# Supplementary material for: Two worlds beneath: Distinct microbial strategies of the rock-attached and planktonic subsurface biosphere
Source: Research Square preprint supplement (doi:10.21203/rs.3.rs-7131340/v1), 2025-07-16
Supplement: Supplementary file 1 [file 6a26823648c3a4cd3f44800e.xlsx]

## Sheet: Table S1
Table S1: Yields of metagenomic sequencing per sample of attached communities in Gbp
Sample	Sequencing yields / Gbp
PS41_06_1	28.0291
PS41_06_2	24.5665
PS41_18_1	35.1002
PS41_18_2	21.6248
PS41_30_1	35.3802
PS41_30_2	23.8486
PS52_06_1	27.2088
PS52_06_2	23.6068
PS52_18_1	20.4787
PS52_18_2	21.3573
RC41_B04_2	21.9045
RC41_B21_3	28.6373
RC41_B44_1	28.0123
RC41_F28_1	26.8827
RC41_F44_3	23.9669
RC52_B28_1	22.9441
RC52_B44_1	25.0724
RC52_F14_3	26.3357
RC52_F28_3	25.0582
RC52_F44_2	23.3203

## Sheet: Table S2
Table S2: Normalized genome coverages, average coverage, standard deviation, genome sizes, genome completeness, and contamination of 605 MAGs from attached communities in the present study.
MAG name	Kingdom	Phylum	Class	Order	Family	Genus	PS41_06_1_1.fastq	PS41_06_2_1.fastq	PS41_18_1_1.fastq	PS41_18_2_1.fastq	PS41_30_1_1.fastq	PS41_30_2_1.fastq	PS52_06_1_1.fastq	PS52_06_2_1.fastq	PS52_18_1_1.fastq	PS52_18_2_1.fastq	Average_attached	Std. dev	Genome size	Completeness	Contamination
PS41_06_1_bin.1	dBacteria	pPatescibacteria	cPaceibacteria	oUBA9983A	fUBA5272	UBA11704	0.554223	0.265548	0.0248815	0.0506044	0.0326762	0.0475662	0.00612191	0.00648552	0.00363376	0.00437458	0.0996115	0.168842	731554	90.7	0
PS41_06_1_bin.11	dBacteria	pPseudomonadota	cAlphaproteobacteria	oCaulobacterales	fCaulobacteraceae	Caulobacter	0.128913	0.107364	0.0160552	0.0153246	0.00863432	0.00783078	0.00951727	0.00741123	0.0114497	0.0100151	0.0322514	0.0433004	2757716	63.2243	2.75974
PS41_06_1_bin.12	dBacteria	pPseudomonadota	cGammaproteobacteria	oBurkholderiales	fBurkholderiaceae	Undibacterium	0.273474	0.313465	0.00633973	0.0106898	0.00468831	0.00478456	0.508199	0.645103	0.229163	0.187154	0.218306	0.214158	4178753	91.0681	2.10159
PS41_06_1_bin.14	dBacteria	pPseudomonadota	cGammaproteobacteria	oBurkholderiales	fBurkholderiaceae	Undibacterium	0.1245	0.0960194	0.00248927	0.00589538	0.00148163	0.0015631	0.216353	0.222217	0.0277939	0.0330993	0.0731412	0.0832624	2943706	68.2829	3.12085
PS41_06_1_bin.15	dBacteria	pPseudomonadota	cGammaproteobacteria	oBurkholderiales	fBurkholderiaceae	Paucibacter	0.189475	0.127118	0.0118548	0.0139548	0.00607514	0.00552628	0.0159795	0.0124518	0.00979736	0.0100856	0.0402318	0.0607326	3761368	65.2482	3.31079
PS41_06_1_bin.17	dBacteria	pPseudomonadota	cGammaproteobacteria	oPseudomonadales	fPseudomonadaceae	Pseudomonas	0.116307	0.116185	0.00435276	0.00485507	0.00274971	0.00276537	0.0110755	0.0128368	0.0054678	0.00580175	0.0282397	0.0441137	1879074	56.4753	0
PS41_06_1_bin.18	dBacteria	pPseudomonadota	cAlphaproteobacteria	oCaulobacterales	fCaulobacteraceae	Phenylobacterium	0.423524	0.422052	0.0316228	0.0320869	0.0136909	0.0120527	0.0140758	0.0129387	0.0394426	0.0245086	0.102599	0.160349	3105264	65.8253	3.73573
PS41_06_1_bin.20	dBacteria	pPseudomonadota	cGammaproteobacteria	oBurkholderiales	fBurkholderiaceae	Rubrivivax	0.402348	0.32031	0.151416	0.120237	0.157836	0.106192	0.0500117	0.0293785	0.0306404	0.0343245	0.140269	0.121153	4517321	61.1691	4.26791
PS41_06_1_bin.21	dBacteria	pPseudomonadota	cGammaproteobacteria	oBurkholderiales	fBurkholderiaceae	Undibacterium	0.976472	0.811782	0.0162758	0.0270237	0.00904331	0.00933876	0.0250282	0.0299974	0.0296264	0.0241569	0.195874	0.351137	4942675	94.7183	1.48044
PS41_06_1_bin.22	dBacteria	pPseudomonadota	cAlphaproteobacteria	oRhizobiales	fXanthobacteraceae	Afipia	0.142233	0.121807	0.132165	0.0906906	0.0877395	0.0846838	0.0337759	0.0332582	0.0314492	0.0300047	0.0787807	0.042073	3596606	80.206	3.08544
PS41_06_1_bin.25	dBacteria	pNitrospirota	cNitrospiria	oNitrospirales	fNitrospiraceae	Palsa-1315	0.355678	0.554591	0.101396	0.120073	0.31544	0.323778	0.0403325	0.0233718	0.0338738	0.0335656	0.19021	0.17486	2798274	83.5038	3.23864
PS41_06_1_bin.26	dBacteria	pActinomycetota	cActinomycetia	oPropionibacteriales	fPropionibacteriaceae	Cutibacterium	0.156098	0.0873065	0.00881243	0.0258584	0.0118521	0.00757541	0.0594164	0.0632674	0.0450713	0.0522909	0.0517549	0.0429492	1804118	72.9671	1.8843
PS41_06_1_bin.28	dBacteria	pPseudomonadota	cGammaproteobacteria	oEnterobacteralesA	fDSM-103792	NA	0.127536	0.110649	0.033803	0.0394806	0.0667052	0.100898	0.00559476	0.00263869	0.00101202	0.00473004	0.0493047	0.0464672	2832458	60.8792	2.5118
PS41_06_1_bin.3	dBacteria	pPseudomonadota	cGammaproteobacteria	oBurkholderiales	fBurkholderiaceae	Aquabacterium	0.144245	0.119066	0.321207	0.242719	0.194932	0.179732	0.0265226	0.0330351	0.0494637	0.0439041	0.135483	0.0948606	4001629	53.3971	0.700935
PS41_06_1_bin.31	dBacteria	pBdellovibrionota	cBacteriovoracia	oBacteriovoracales	fBacteriovoracaceae	Bacteriovorax	0.109693	0.0376646	0.00718659	0.0122033	0.00194802	0.00280954	0.00250231	0.00187813	0.00198392	0.00173728	0.0179607	0.0323332	1967417	51.1483	0
PS41_06_1_bin.32	dBacteria	pPseudomonadota	cGammaproteobacteria	oBurkholderiales	fRhodocyclaceae	Rugosibacter	0.889249	0.957235	0.0762254	0.0808524	0.0632921	0.0572038	0.0224861	0.0226675	0.0200322	0.01861	0.220785	0.352277	2618601	96.8419	0.760719
PS41_06_1_bin.33	dBacteria	pBacteroidota	cBacteroidia	oChitinophagales	fChitinophagaceae	Ferruginibacter	0.0796756	0.0578854	0.0181322	0.0327718	0.143916	0.265133	0.0335024	0.0127627	0.030863	0.0520949	0.0726738	0.0736521	1800081	50.9195	0.782704
PS41_06_1_bin.36	dBacteria	pPseudomonadota	cGammaproteobacteria	oBurkholderiales	fBurkholderiaceae	Hydrogenophaga	0.824207	1.25175	0.247108	0.219738	0.192439	0.151869	0.0283739	0.0409631	0.0203645	0.0193162	0.299613	0.39003	5402147	84.9517	1.32399
PS41_06_1_bin.37	dBacteria	pBacteroidota	cBacteroidia	oFlavobacteriales	fCrocinitomicaceae	JADJGJ01	1.246	0.750091	0.380261	0.678813	0.251305	0.463525	0.0211172	0.0349653	0.00741336	0.0113995	0.384489	0.390139	4558841	99.4595	0
PS41_06_1_bin.39	dBacteria	pActinomycetota	cActinomycetia	oMycobacteriales	fMycobacteriaceae	Rhodococcus	0.133817	0.166357	3.9287	3.61165	2.70354	2.34531	2.40863	1.1859	1.34201	1.72783	1.95537	1.22855	4261960	65.8045	4.19262
PS41_06_1_bin.4	dBacteria	pBacteroidota	cBacteroidia	oAKYH767	fPalsa-965	GCA-2737665	0.244701	0.182328	0.00986422	0.0210214	0.0213709	0.0500149	0.0025683	0.00132194	0.00134656	0.00161272	0.053615	0.0823934	3467175	79.3704	3.04233
PS41_06_1_bin.41	dBacteria	pMyxococcota	cMyxococcia	oMyxococcales	fMyxococcaceae	Archangium	1.02088	0.824104	0.398702	0.369868	0.122234	0.115353	0.0137515	0.0366495	0.0233824	0.0187119	0.294364	0.343699	9360145	90.1971	1.93548
PS41_06_1_bin.42	dBacteria	pPseudomonadota	cGammaproteobacteria	oBurkholderiales	fBurkholderiaceae	Hydrogenophaga	0.184303	0.130231	0.147837	0.111029	0.151351	0.125295	0.0862988	0.04131	0.0396747	0.053051	0.107038	0.0476318	3370217	64.1549	1.51869
PS41_06_1_bin.44	dBacteria	pBacteroidota	cBacteroidia	oFlavobacteriales	fCrocinitomicaceae	Fluviicola	0.386429	0.245872	0.0199774	0.0549069	0.0303718	0.0524828	0.00549124	0.00376688	0.00365749	0.00407007	0.0807026	0.123214	3137186	54.3103	1.72414
PS41_06_1_bin.45	dBacteria	pPseudomonadota	cAlphaproteobacteria	oSphingomonadales	fSphingomonadaceae	Aquisediminimonas	0.526312	0.399346	0.0674621	0.0773359	0.0314629	0.031939	0.0232076	0.018621	0.0250673	0.0210818	0.122184	0.173693	3028621	99.4967	0.0144928
PS41_06_1_bin.48	dBacteria	pPseudomonadota	cGammaproteobacteria	oBurkholderiales	fBurkholderiaceae	Undibacterium	0.751828	0.372791	0.0880165	0.237382	0.0148167	0.0161078	0.0279358	0.0202764	0.0187487	0.017862	0.156576	0.229237	6585993	97.4293	2.15471
PS41_06_1_bin.49	dBacteria	pPseudomonadota	cAlphaproteobacteria	oSphingomonadales	fSphingomonadaceae	Aquisediminimonas	0.398655	0.396371	0.1732	0.132371	0.283987	0.212062	0.0146382	0.0368725	0.0113183	0.0103629	0.166984	0.145653	2837081	97.2069	0.0434783
PS41_06_1_bin.50	dBacteria	pPseudomonadota	cGammaproteobacteria	oBurkholderiales	fBurkholderiaceae	Ideonella	0.192396	0.146657	0.636322	0.505303	0.534946	0.48672	0.118869	0.112161	0.0983825	0.0925066	0.292426	0.207759	3494238	62.8427	2.01058
PS41_06_1_bin.51	dBacteria	pPseudomonadota	cGammaproteobacteria	oBurkholderiales	fNeisseriaceae	QFNR01	0.0981933	0.0544626	0.00247979	0.0184487	0.00297685	0.00243896	0.020845	0.0219292	0.0106201	0.0108731	0.0243268	0.028632	1182327	84.1063	2.24359
PS41_06_1_bin.52	dBacteria	pPseudomonadota	cGammaproteobacteria	oBurkholderiales	fSCOH01	NA	0.305294	0.264211	0.010062	0.0138044	0.0034892	0.00351411	0.567208	0.583165	0.351529	0.520806	0.262308	0.230627	3312534	91.1944	3.63248
PS41_06_1_bin.53	dBacteria	pPseudomonadota	cGammaproteobacteria	oPseudomonadales	fOleiphilaceae	NA	0.164646	0.103959	0.0174639	0.0238464	0.00362246	0.00400138	0.18384	0.237582	0.743595	0.989242	0.24718	0.323978	2713144	73.724	2.51478
PS41_06_1_bin.54	dBacteria	pBacteroidota	cBacteroidia	oFlavobacteriales	fFlavobacteriaceae	Flavobacterium	0.648343	0.330808	0.0588751	0.0876104	0.0608791	0.102892	0.0458675	0.0215693	0.0247132	0.0271087	0.140867	0.18992	4024355	65.3931	4.12586
PS41_06_1_bin.55	dBacteria	pPseudomonadota	cGammaproteobacteria	oBurkholderiales	fBurkholderiaceae	Aquabacterium	0.211301	0.211214	0.354143	0.315196	0.105769	0.0974329	0.0446018	0.0393961	0.021757	0.0264047	0.142722	0.1165	5092956	73.6807	3.9575
PS41_06_1_bin.57	dBacteria	pPseudomonadota	cAlphaproteobacteria	oCaulobacterales	fCaulobacteraceae	Phenylobacterium	0.258274	0.234389	0.0392443	0.0388266	0.0175213	0.0161218	0.0165608	0.0159726	0.0254498	0.0174127	0.0679773	0.0897382	3608731	67.881	2.71104
PS41_06_1_bin.58	dBacteria	pNitrospirota	cNitrospiria	oNitrospirales	fNitrospiraceae	Palsa-1315	0.183132	0.26771	0.0335589	0.054888	0.136639	0.207369	0.0235835	0.0117216	0.0201257	0.0229546	0.0961682	0.0895317	3804335	62.0783	3.74369
PS41_06_1_bin.62	dBacteria	pBacteroidota	cBacteroidia	oAKYH767	fB-17BO	UBA4416	0.383835	0.300434	0.0315272	0.0554954	0.00660743	0.0117979	0.00100696	0.00365766	0.00106554	0.000805816	0.0796234	0.133591	3999279	95.1164	2.1746
PS41_06_1_bin.64	dBacteria	pPseudomonadota	cGammaproteobacteria	oPseudomonadales	fPseudomonadaceae	Pseudomonas	0.432505	0.429866	0.0130248	0.0151028	0.00623046	0.0050802	0.00393043	0.00403476	0.00366069	0.00276348	0.0916199	0.169829	1977151	52.7655	1.2254
PS41_06_1_bin.67	dBacteria	pNitrospirota	cNitrospiria	oNitrospirales	fNitrospiraceae	NitrospiraF	0.223829	0.243617	0.0233825	0.0301173	0.0511189	0.0600177	0.065609	0.0496594	0.0927866	0.0716664	0.0911803	0.0738207	1777073	52.3232	4.54545
PS41_06_1_bin.69	dBacteria	pPseudomonadota	cGammaproteobacteria	oBurkholderiales	fNitrosomonadaceae	Nitrosomonas	0.354959	0.413343	0.0294359	0.051875	0.0486617	0.0689417	0.0308934	0.0285898	0.0581425	0.0409256	0.112577	0.136974	1448686	66.2115	8.19272
PS41_06_1_bin.70	dBacteria	pPseudomonadota	cGammaproteobacteria	oBurkholderiales	fNitrosomonadaceae	Nitrosomonas	0.242248	0.219131	0.0154723	0.0231797	0.020954	0.0258883	0.00985947	0.00822703	0.0136499	0.0113299	0.058994	0.0861774	2765424	64.8914	7.68208
PS41_06_1_bin.71	dBacteria	pPseudomonadota	cAlphaproteobacteria	oRhizobiales	fXanthobacteraceae	Bradyrhizobium	0.221975	0.218041	0.106777	0.0851358	0.101359	0.0874393	0.0384384	0.0376874	0.0841235	0.057072	0.103805	0.0623384	4554779	53.7147	0
PS41_06_1_bin.72	dBacteria	pPseudomonadota	cGammaproteobacteria	oNevskiales	fNevskiaceae	Nevskia	0.103744	0.148436	0.0586373	0.0769921	0.00905805	0.00737941	0.00236093	0.00699996	0.0039784	0.0031263	0.0420712	0.0496778	2386002	62.026	1.718
PS41_06_1_bin.73	dBacteria	pPseudomonadota	cGammaproteobacteria	oPseudomonadales	fCellvibrionaceae	CAMCXE01	0.163482	0.172863	0.00222657	0.0046182	0.00235481	0.0020025	0.00207027	0.000892128	0.00136117	0.00196955	0.0353841	0.0664338	3987583	73.2919	4.68574
PS41_06_1_bin.9	dBacteria	pBacteroidota	cBacteroidia	oFlavobacteriales	fCrocinitomicaceae	Fluviicola	0.45297	0.280772	0.0418081	0.0871554	0.0587544	0.0854428	0.00707387	0.00559751	0.00559273	0.005126	0.103029	0.140748	4090963	90.9369	1.08108
PS41_06_2_bin.12	dBacteria	pPseudomonadota	cGammaproteobacteria	oBurkholderiales	fBurkholderiaceae	Undibacterium	0.0774421	0.158703	0.00238711	0.00574994	0.00133899	0.00140562	0.216472	0.223893	0.028408	0.0332282	0.0749028	0.0860357	2892156	72.9201	2.869
PS41_06_2_bin.14	dBacteria	pPseudomonadota	cAlphaproteobacteria	oRhizobiales	fXanthobacteraceae	Afipia	0.100555	0.16627	0.12839	0.0883533	0.0845201	0.081482	0.0325972	0.0320216	0.0306872	0.0286407	0.0773518	0.0445505	3361084	70.8963	0.316456
PS41_06_2_bin.2	dBacteria	pPseudomonadota	cGammaproteobacteria	oBurkholderiales	fBurkholderiaceae	Rhodoferax	4.13949	3.91285	0.522045	0.628831	0.140578	0.135369	0.154452	0.230685	0.182853	0.136998	1.01842	1.51359	4765625	99.2495	0.498442
PS41_06_2_bin.20	dBacteria	pPseudomonadota	cGammaproteobacteria	oPseudomonadales	fCellvibrionaceae	CAMCXE01	0.0514033	0.822786	0.00292493	0.00600959	0.00273786	0.00185873	0.00139422	0.00280137	0.000611701	0.000962688	0.089349	0.244919	5647167	99.0517	2.06884
PS41_06_2_bin.23	dBacteria	pPseudomonadota	cGammaproteobacteria	oPseudomonadales	fCellvibrionaceae	CAMCXE01	0.12624	0.191611	0.00351253	0.00783718	0.00332829	0.00351671	0.00256094	0.00140343	0.00201542	0.00219611	0.0344221	0.0639664	3802210	56.3745	9.61944
PS41_06_2_bin.24	dBacteria	pPseudomonadota	cAlphaproteobacteria	oSphingomonadales	fSphingomonadaceae	Sphingobium	1.59601	1.51384	0.0916254	0.0926231	0.0326229	0.0260796	0.0417018	0.0332505	0.0434279	0.0311595	0.350234	0.603053	2403362	85.5281	3.35202
PS41_06_2_bin.27	dBacteria	pPseudomonadota	cAlphaproteobacteria	oCaulobacterales	fCaulobacteraceae	Phenylobacterium	0.416722	0.480442	0.0326476	0.0426851	0.0179007	0.0134985	0.0198452	0.0181389	0.041896	0.0288652	0.111264	0.169525	3130761	71.0616	3.94263
PS41_06_2_bin.31	dBacteria	pPseudomonadota	cGammaproteobacteria	oEnterobacteralesA	fDSM-103792	NA	0.0854574	0.156174	0.0328295	0.0378278	0.0652539	0.0985763	0.00586305	0.00251334	0.000916389	0.00426478	0.0489677	0.0492533	2681064	59.7676	3.78378
PS41_06_2_bin.32	dBacteria	pPseudomonadota	cGammaproteobacteria	oBurkholderiales	fRhodocyclaceae	CAJBIL01	0.227259	0.180779	0.00759075	0.0087468	0.00711747	0.00584542	0.460771	0.613667	0.52452	0.374205	0.24105	0.225287	2153343	59.8323	1.18813
PS41_06_2_bin.34	dBacteria	pPatescibacteria	cPaceibacteria	oUBA9983A	fEsbW-18	NA	0.195021	0.236314	0.0772913	0.108496	0.117803	0.130451	0.00735582	0.00960443	0.00320103	0.00471194	0.0890249	0.0796506	574990	74.42	0
PS41_06_2_bin.36	dBacteria	pBacteroidota	cBacteroidia	oFlavobacteriales	fFlavobacteriaceae	Flavobacterium	0.491127	0.348809	0.0469908	0.0684682	0.0511895	0.086798	0.0381882	0.0164529	0.0205504	0.0225773	0.119115	0.155145	2911887	54.8851	1.72414
PS41_06_2_bin.37	dBacteria	pPseudomonadota	cGammaproteobacteria	oPseudomonadales	fPseudomonadaceae	Pseudomonas	0.382177	0.471715	0.0134989	0.014857	0.00547293	0.00461431	0.00332992	0.00330965	0.00263921	0.00224369	0.0903858	0.169519	2439342	51.1962	1.75439
PS41_06_2_bin.38	dBacteria	pPseudomonadota	cGammaproteobacteria	oNevskiales	fNevskiaceae	Panacagrimonas	0.0807015	0.154957	0.217784	0.196812	0.115977	0.0784283	0.00728803	0.0258885	0.0148879	0.0111789	0.0903902	0.0746034	3670294	61.4514	3.59425
PS41_06_2_bin.39	dBacteria	pBacteroidota	cBacteroidia	oFlavobacteriales	fCrocinitomicaceae	Fluviicola	0.304782	0.274288	0.0169314	0.0482329	0.0251004	0.044371	0.0045808	0.00310557	0.0032405	0.00337062	0.0728003	0.109723	2937512	51.8809	0
PS41_06_2_bin.4	dBacteria	pPseudomonadota	cGammaproteobacteria	oPseudomonadales	fPseudomonadaceae	Pseudomonas	0.122855	0.163851	0.00524664	0.00614057	0.00324976	0.00358593	0.0115929	0.013053	0.00632905	0.0070586	0.0342963	0.0553729	2849304	65.4492	0
PS41_06_2_bin.41	dBacteria	pPseudomonadota	cAlphaproteobacteria	oCaulobacterales	fCaulobacteraceae	Phenylobacterium	0.23738	0.240188	0.0342883	0.0331136	0.0146644	0.0140667	0.0141947	0.0131813	0.0224342	0.0156473	0.0639159	0.0877472	3247655	55.5799	3.59307
PS41_06_2_bin.42	dBacteria	pMyxococcota	cUBA727	oUBA727	fVGSZ01	VGSZ01	0.931956	0.990243	0.0655489	0.0783646	0.00922074	0.0086797	0.0115591	0.0119717	0.0121687	0.00902371	0.212874	0.37511	8106014	90.7168	6.77419
PS41_06_2_bin.44	dBacteria	pPseudomonadota	cGammaproteobacteria	oBurkholderiales	fNitrosomonadaceae	VFJL01	0.21504	0.423044	0.0759204	0.094665	0.17845	0.205658	0.0185811	0.00736221	0.00600696	0.0101769	0.12349	0.127324	1329884	73.0177	1.88095
PS41_06_2_bin.45	dBacteria	pBdellovibrionota	cBdellovibrionia	oBdellovibrionales	fBdellovibrionaceae	Pseudobdellovibrio	1.09749	1.26767	0.0818697	0.158861	0.0223151	0.0293393	0.00512473	0.00680276	0.0039865	0.00394795	0.26774	0.461304	3486876	99.0991	1.8018
PS41_06_2_bin.46	dBacteria	pPseudomonadota	cGammaproteobacteria	oBurkholderiales	fRhodocyclaceae	Azonexus	0.546944	0.70399	0.0226648	0.0302302	0.023786	0.023643	0.0249127	0.023557	0.0222138	0.0217602	0.14437	0.243108	3291583	70.3757	3.82245
PS41_06_2_bin.47	dBacteria	pPseudomonadota	cGammaproteobacteria	oBurkholderiales	fBurkholderiaceae	Hydrogenophaga	0.180678	0.199115	0.159539	0.125971	0.158799	0.134429	0.0906792	0.0458739	0.0441329	0.0574052	0.119662	0.0541116	3751946	69.0466	4.40866
PS41_06_2_bin.48	dBacteria	pBacteroidota	cBacteroidia	oFlavobacteriales	fCrocinitomicaceae	Fluviicola	0.325651	0.316748	0.03744	0.0762793	0.0532986	0.0758662	0.00600193	0.00511433	0.00477985	0.00455798	0.0905737	0.118433	3561934	83.0631	1.62162
PS41_06_2_bin.5	dBacteria	pNitrospirota	cNitrospiria	oNitrospirales	fNitrospiraceae	Palsa-1315	0.173533	0.27643	0.0323772	0.0547759	0.136062	0.211916	0.0235732	0.0118898	0.020531	0.0228025	0.0963891	0.0909546	3996070	81.875	4.05682
PS41_06_2_bin.50	dBacteria	pPseudomonadota	cGammaproteobacteria	oBurkholderiales	fBurkholderiaceae	Undibacterium	2.96977	2.51949	0.0914053	0.155221	0.0574171	0.0591616	2.5351	3.50066	4.51139	3.33418	1.97338	1.62527	4557220	97.4198	0.375166
PS41_06_2_bin.51	dBacteria	pPseudomonadota	cAlphaproteobacteria	oSphingomonadales	fSphingomonadaceae	Sphingobium	1.73654	1.69661	0.0552397	0.0632113	0.0228069	0.0193092	0.0303517	0.019018	0.0256142	0.0210418	0.368975	0.674016	3119108	88.7884	0.767918
PS41_06_2_bin.53	dBacteria	pPseudomonadota	cGammaproteobacteria	oBurkholderiales	fRhodocyclaceae	Azonexus	0.334634	0.365096	0.0239293	0.0211241	0.0249857	0.0175487	0.146141	0.183166	0.121052	0.0841104	0.132179	0.122127	1358078	51.2202	1.22696
PS41_06_2_bin.54	dBacteria	pPseudomonadota	cGammaproteobacteria	oBurkholderiales	fBurkholderiaceae	Aquabacterium	0.188421	0.206707	0.337867	0.297809	0.0995172	0.0911467	0.0426438	0.0369631	0.0194214	0.024004	0.13445	0.11075	4863236	73.9531	4.05338
PS41_06_2_bin.56	dBacteria	pPseudomonadota	cAlphaproteobacteria	oCaulobacterales	fCaulobacteraceae	Caulobacter	0.108597	0.125337	0.0157043	0.0144575	0.008463	0.00758338	0.00922208	0.00730804	0.0107398	0.00938558	0.0316797	0.0428872	2481592	52.2582	1.98052
PS41_06_2_bin.58	dBacteria	pPseudomonadota	cGammaproteobacteria	oBurkholderiales	fGallionellaceae	39-52-133	0.178944	0.428175	0.0436771	0.0575573	0.0418705	0.0592445	0.0560564	0.0287827	0.0406774	0.0520697	0.0987055	0.116939	2281417	78.895	2.38095
PS41_06_2_bin.6	dBacteria	pPseudomonadota	cGammaproteobacteria	oBurkholderiales	fBurkholderiaceae	Ideonella	0.125012	0.154972	0.6026	0.471838	0.433828	0.391883	0.103088	0.106698	0.0919705	0.0818401	0.256373	0.1863	3056202	62.0266	2.40229
PS41_06_2_bin.61	dBacteria	pPseudomonadota	cGammaproteobacteria	oEnterobacteralesA	fAlteromonadaceae	Pararheinheimera	0.185257	0.201858	0.0105641	0.0169247	0.00319187	0.00445307	0.00504497	0.00389517	0.00368339	0.00380508	0.0438677	0.0750464	4077174	93.0453	3.57171
PS41_06_2_bin.63	dBacteria	pNitrospirota	cNitrospiria	oNitrospirales	fNitrospiraceae	Nitrospira	0.714268	0.963333	0.0842094	0.0983785	0.127639	0.142705	0.0582859	0.0503794	0.120485	0.0798102	0.243949	0.303863	2386254	53.1035	8.76768
PS41_06_2_bin.65	dBacteria	pPseudomonadota	cAlphaproteobacteria	oRhizobiales	fXanthobacteraceae	Bradyrhizobium	0.191274	0.268838	0.103853	0.0845684	0.0979225	0.0853253	0.0376669	0.0368518	0.0791518	0.0540913	0.103954	0.0689701	5054199	53.9302	9.16419
PS41_06_2_bin.67	dBacteria	pNitrospirota	cNitrospiria	oNitrospirales	fNitrospiraceae	NitrospiraF	0.217446	0.31252	0.0273866	0.0357593	0.0565141	0.0658221	0.0554634	0.0424475	0.0778444	0.0602995	0.0951503	0.0886254	2772807	54.5354	1.51515
PS41_06_2_bin.68	dBacteria	pPseudomonadota	cGammaproteobacteria	oBurkholderiales	fRBG-16-58-11	RBG-16-58-11	0.246508	0.544283	0.0614889	0.085616	0.104367	0.109096	0.0373244	0.0175196	0.034028	0.0298694	0.12701	0.152758	1835835	52.7341	6.65997
PS41_06_2_bin.69	dBacteria	pPseudomonadota	cGammaproteobacteria	oNevskiales	fNevskiaceae	Nevskia	0.105789	0.20806	0.0735635	0.0965825	0.0114869	0.00953743	0.0030038	0.00877061	0.00501652	0.00367067	0.0525481	0.0647723	3714304	89.3594	2.23053
PS41_06_2_bin.70	dBacteria	pPseudomonadota	cGammaproteobacteria	oBurkholderiales	fBurkholderiaceae	LMDS01	0.123511	0.27335	0.179583	0.16986	0.190064	0.117397	0.0153699	0.0312582	0.0141851	0.0126175	0.11272	0.0868912	2865964	77.9877	6.00713
PS41_06_2_bin.8	dBacteria	pPseudomonadota	cGammaproteobacteria	oBurkholderiales	fBurkholderiaceae	Rhodoferax	0.212397	0.148677	0.0178677	0.021628	0.0188471	0.0210575	0.0260811	0.0180921	0.021701	0.0206058	0.0526954	0.0655271	3017193	71.7068	3.12428
PS41_18_1_bin.13	dBacteria	pMyxococcota	cUBA9042	oGCA-2863065	fGCA-2863065	SXOO01	0.0588152	0.0411116	0.184835	0.272216	0.00718944	0.00860719	0.00299898	0.0190953	0.00377669	0.00239101	0.0601036	0.0882099	7448052	84.1598	5.82949
PS41_18_1_bin.15	dBacteria	pPseudomonadota	cAlphaproteobacteria	oSphingomonadales	fSphingomonadaceae	Novosphingobium	0.0876559	0.136159	0.440242	0.339912	0.15588	0.129458	0.0669184	0.107907	0.0669103	0.0575773	0.158862	0.121728	3104522	96.9738	0.560702
PS41_18_1_bin.16	dBacteria	pPseudomonadota	cAlphaproteobacteria	oUBA11222	fUBA11222	UBA11222	0.0342401	0.047127	0.731189	0.945216	0.625741	0.692874	0.0254733	0.090935	0.00696351	0.0122164	0.321197	0.357845	2980366	95.9783	1.95652
PS41_18_1_bin.17	dBacteria	pPseudomonadota	cGammaproteobacteria	oBurkholderiales	fBurkholderiaceae	Polaromonas	0.078977	0.153679	0.860883	0.61031	0.436986	0.357133	0.18169	0.154219	0.0853103	0.118236	0.303742	0.248478	3833211	96.8996	0.186916
PS41_18_1_bin.18	dBacteria	pChloroflexota	cAnaerolineae	oAnaerolineales	fEnvOPS12	UBA12294	0.0540973	0.0645789	0.0784556	0.10611	0.180964	0.225595	0.00857093	0.00600867	0.00690543	0.00936589	0.0740652	0.0731718	2938894	77.9054	1.0101
PS41_18_1_bin.20	dBacteria	pPseudomonadota	cAlphaproteobacteria	oCaulobacterales	fCaulobacteraceae	Phenylobacterium	0.213233	0.21059	0.0484247	0.0308271	0.0143073	0.0131824	0.01411	0.0129434	0.025172	0.0167063	0.0599497	0.0767008	1933422	54.1796	3.26313
PS41_18_1_bin.21	dBacteria	pMyxococcota	cPolyangia	oPolyangiales	fPolyangiaceae	JAAFHV01	0.0387557	0.0695654	0.101135	0.0753069	0.0117813	0.00963897	0.0193243	0.019391	0.0215078	0.0177141	0.038412	0.0304029	6193696	50.3676	1.98157
PS41_18_1_bin.22	dBacteria	pNitrospirota	cNitrospiria	oNitrospirales	fNitrospiraceae	Palsa-1315	0.356827	0.569598	0.114381	0.124349	0.320681	0.331774	0.0423969	0.0247403	0.0356657	0.0352186	0.195563	0.177678	3157078	83.9773	3.25758
PS41_18_1_bin.23	dBacteria	pPseudomonadota	cGammaproteobacteria	oBurkholderiales	fBurkholderiaceae	Aquabacterium	0.214713	0.225155	0.416456	0.366968	0.128952	0.118249	0.0524008	0.0455935	0.0244974	0.0303312	0.162332	0.133543	6089396	94.2765	3.54556
PS41_18_1_bin.24	dBacteria	pPseudomonadota	cAlphaproteobacteria	oMicavibrionales	fMicavibrionaceae	UBA1573	0.190516	0.111917	0.0633461	0.0816378	0.00908647	0.0126878	0.0282664	0.0362906	0.0361664	0.0445883	0.0614502	0.0523387	1920144	85.1528	2.93808
PS41_18_1_bin.27	dBacteria	pPseudomonadota	cAlphaproteobacteria	oUBA11222	fUBA11222	UBA11222	0.0217404	0.045841	1.14164	0.864293	0.615077	0.558741	0.0232366	0.142552	0.00998229	0.0100783	0.343318	0.398223	2670928	73.6166	3.81333
PS41_18_1_bin.28	dBacteria	pPseudomonadota	cGammaproteobacteria	oBurkholderiales	fBurkholderiaceae	Undibacterium	0.564754	0.281565	0.0863428	0.179952	0.0111902	0.0125618	0.0221108	0.0161273	0.0146152	0.0139357	0.120315	0.171682	4783957	66.7524	2.10159
PS41_18_1_bin.29	dBacteria	pPseudomonadota	cGammaproteobacteria	oBurkholderiales	fBurkholderiaceae	Ramlibacter	0.0245676	0.0299303	0.356862	0.369515	0.0545103	0.0536417	0.0868924	0.106913	0.117547	0.083981	0.128436	0.120885	2702554	51.8809	0
PS41_18_1_bin.3	dBacteria	pPseudomonadota	cAlphaproteobacteria	oSphingomonadales	fSphingomonadaceae	Aquisediminimonas	0.0277512	0.0242393	0.0571609	0.0465351	0.0506201	0.0478513	0.0290457	0.013428	0.0133191	0.0188599	0.0328811	0.0154535	2241332	74.1549	2.93478
PS41_18_1_bin.33	dBacteria	pPseudomonadota	cGammaproteobacteria	oBurkholderiales	fBurkholderiaceae	Methylibium	0.0310296	0.0516884	0.747594	0.465055	0.717072	0.658971	0.0473289	0.114879	0.0287314	0.0317314	0.289408	0.301155	3792040	90.5269	1.65498
PS41_18_1_bin.35	dBacteria	pPseudomonadota	cGammaproteobacteria	oPseudomonadales	fKetobacteraceae	Ch67	0.14958	0.153876	2.01968	1.82142	0.830516	0.877071	0.59388	0.35472	0.401721	0.428244	0.76307	0.624679	6214341	98.865	2.8858
PS41_18_1_bin.36	dBacteria	pVerrucomicrobiota	cVerrucomicrobiae	oOpitutales	fOpitutaceae	Lacunisphaera	0.0516251	0.0574451	0.111114	0.0848468	0.455967	0.444141	0.0390961	0.0237853	0.0385212	0.0450201	0.135156	0.159252	2046261	73.623	0.304716
PS41_18_1_bin.37	dBacteria	pMyxococcota	cPolyangia	oPolyangiales	fPolyangiaceae	CAITIQ01	0.102002	0.087487	0.214165	0.144174	0.0754584	0.0912509	0.0362745	0.0327379	0.0247531	0.0239937	0.0832297	0.0574771	8608857	82.1403	4.83871
PS41_18_1_bin.38	dBacteria	pPseudomonadota	cGammaproteobacteria	oBurkholderiales	fBurkholderiaceae	Aquabacterium	0.90197	0.942485	0.0512633	0.0437753	0.0229694	0.0232694	0.227959	0.296217	0.327866	0.319419	0.315719	0.325559	2804898	69.963	2.98799
PS41_18_1_bin.39	dBacteria	pPseudomonadota	cGammaproteobacteria	oBurkholderiales	fBurkholderiaceae	Herbaspirillum	0.00515954	0.00654274	0.0741026	0.0704813	0.164369	0.240344	0.0706258	0.0110994	0.00889906	0.029407	0.068103	0.0741522	4123135	70.9793	1.74095
PS41_18_1_bin.40	dBacteria	pBacteroidota	cBacteroidia	oAKYH767	fB-17BO	JADJDM01	0.0418167	0.0232554	0.107634	0.162436	0.0142497	0.0229807	0.000841899	0.00926573	0.00117334	0.000702032	0.0384355	0.0512899	3114213	71.7407	1.50794
PS41_18_1_bin.41	dBacteria	pPseudomonadota	cGammaproteobacteria	oNevskiales	fNevskiaceae	Panacagrimonas	0.109163	0.168325	0.311869	0.278471	0.167297	0.112678	0.00944397	0.0361957	0.0218674	0.0152773	0.123059	0.10316	5030248	98.4501	2.49094
PS41_18_1_bin.43	dBacteria	pPseudomonadota	cAlphaproteobacteria	oSphingomonadales	fSphingomonadaceae	Sphingopyxis	0.0284073	0.0317735	0.449237	0.374021	0.0295253	0.0222488	0.0391635	0.0697075	0.0717277	0.0401987	0.115601	0.149802	2894272	94.8664	0.887372
PS41_18_1_bin.44	dBacteria	pPatescibacteria	cPaceibacteria	oUBA9983A	fEsbW-18	NA	0.21125	0.2372	0.0888601	0.105453	0.124367	0.149775	0.0205914	0.012482	0.0140246	0.0166079	0.0980611	0.0791828	658903	72.09	4.65
PS41_18_1_bin.46	dBacteria	pPseudomonadota	cGammaproteobacteria	oBurkholderiales	fBurkholderiaceae	Aquabacterium	0.144262	0.139111	0.405593	0.291465	0.231847	0.216805	0.0329203	0.0396647	0.0572262	0.0520279	0.161092	0.118114	4870465	79.462	1.4575
PS41_18_1_bin.47	dBacteria	pBdellovibrionota	cBdellovibrionia	oBdellovibrionales	fBdellovibrionaceae	Pseudobdellovibrio	0.000658164	0.00249188	0.107932	0.123115	0.0234216	0.0301327	0.000912847	0.0122866	0.000805967	0.00044118	0.0302197	0.0439204	2893689	81.3326	2.1021
PS41_18_1_bin.48	dBacteria	pPseudomonadota	cGammaproteobacteria	oGa0077536	fGa0077536	JADJYF01	0.00977684	0.0127707	0.183593	0.122057	0.946673	0.900424	0.033006	0.0244372	0.00246392	0.0129329	0.224813	0.353874	4240554	81.0475	2.24389
PS41_18_1_bin.49	dBacteria	pBacteroidota	cBacteroidia	oAKYH767	fPalsa-965	GCA-2737665	0.923447	0.828889	1.59672	3.28559	0.267518	0.408744	0.0107795	0.127225	0.00879918	0.00599522	0.746371	0.978201	4933529	99.5238	1.5873
PS41_18_1_bin.5	dBacteria	pPatescibacteria	cPaceibacteria	oUBA9983A	fUBA5272	NA	0.00905154	0.0112299	0.172247	0.244644	0.0836863	0.104095	0.012288	0.0170699	0.00895162	0.0084442	0.0671707	0.0793988	891301	90.7	2.33
PS41_18_1_bin.50	dBacteria	pPseudomonadota	cAlphaproteobacteria	oSphingomonadales	fSphingomonadaceae	Sphingopyxis	0.258285	0.46039	9.99108	9.19181	2.95581	2.78156	0.968917	1.74322	1.28117	0.918536	3.05508	3.37922	3744653	99.5249	0.877621
PS41_18_1_bin.52	dBacteria	pMyxococcota	cPolyangia	oHaliangiales	fHaliangiaceae	JABFXX01	0.0734937	0.0744039	0.268497	0.196074	0.213016	0.185845	0.0221631	0.0234092	0.0101973	0.0140065	0.108111	0.0926539	9443619	88.0056	2.96211
PS41_18_1_bin.53	dBacteria	pBdellovibrionota	cBacteriovoracia	oBacteriovoracales	fBacteriovoracaceae	NA	0.000879458	0.00306724	0.119699	0.122782	0.013346	0.0173031	0.00071823	0.00680639	0.000884295	0.000496411	0.0285982	0.0466479	2353970	53.9459	0
PS41_18_1_bin.56	dBacteria	pPseudomonadota	cGammaproteobacteria	oBurkholderiales	fBurkholderiaceae	Hydrogenophaga	0.171727	0.16169	0.233318	0.172154	0.181533	0.15556	0.109553	0.0706879	0.063523	0.0751501	0.13949	0.053823	3174142	55.3204	8.55049
PS41_18_1_bin.57	dBacteria	pActinomycetota	cActinomycetia	oMycobacteriales	fMycobacteriaceae	Mycobacterium	0.0403995	0.060373	1.50781	1.36377	0.716797	0.65015	0.744567	0.434228	0.496968	0.603926	0.661899	0.452623	6944665	98.8208	0.943396
PS41_18_1_bin.59	dBacteria	pPseudomonadota	cGammaproteobacteria	oNevskiales	fNevskiaceae	Nevskia	0.0870121	0.154161	0.0753313	0.0824795	0.00941791	0.00782515	0.00258759	0.0072098	0.00422824	0.00308543	0.0433338	0.0502716	2717080	72.2109	2.34921
PS41_18_1_bin.6	dBacteria	pMyxococcota	cMyxococcia	oMyxococcales	fMyxococcaceae	JAEUJQ01	0.00504375	0.00587906	0.0831459	0.0584474	0.0304478	0.0327388	0.00919741	0.00951941	0.00549238	0.00593302	0.0245845	0.0256609	5669112	67.6231	3.87097
PS41_18_1_bin.60	dBacteria	pPseudomonadota	cGammaproteobacteria	oBurkholderiales	fBurkholderiaceae	LMDS01	0.106998	0.200984	0.182903	0.152255	0.167767	0.103685	0.0118265	0.0274173	0.0113475	0.00968068	0.0974864	0.0731113	2367520	56.1441	1.96262
PS41_18_1_bin.61	dBacteria	pPseudomonadota	cGammaproteobacteria	oBurkholderiales	fBurkholderiaceaeA	CAIZPE01	0.0237922	0.0252866	0.160563	0.0749308	0.115294	0.0925418	0.00910615	0.0199781	0.00669133	0.00713076	0.0535315	0.0513603	3649315	55.2195	8.67627
PS41_18_1_bin.62	dBacteria	pPseudomonadota	cAlphaproteobacteria	oSphingomonadales	fSphingomonadaceae	Novosphingobium	0.0623189	0.0782228	0.168793	0.126212	0.0446844	0.0347078	0.0354827	0.0391735	0.0413957	0.0327081	0.06637	0.0437628	2774594	62.5425	6.16772
PS41_18_1_bin.63	dBacteria	pMyxococcota	cUBA6777	o	f	NA	0.00350048	0.00486277	0.124864	0.0913393	0.112904	0.0879872	0.0444595	0.0133908	0.0113455	0.0238285	0.0518483	0.0451985	4707905	53.9969	4.62366
PS41_18_1_bin.64	dBacteria	pPseudomonadota	cAlphaproteobacteria	oCaulobacterales	fCaulobacteraceae	Caulobacter	0.218176	0.173225	0.187042	0.123018	0.10042	0.0799941	0.0830917	0.0886326	0.115561	0.0999334	0.126909	0.0460979	2877291	67.976	3.08442
PS41_18_1_bin.65	dBacteria	pPseudomonadota	cGammaproteobacteria	oBurkholderiales	fBurkholderiaceae	Piscinibacter	0.0778704	0.0834925	0.211339	0.154389	0.311808	0.319431	0.0947707	0.0229647	0.0230172	0.0515452	0.135063	0.10539	2742439	50.7886	2.70639
PS41_18_1_bin.66	dBacteria	pPseudomonadota	cGammaproteobacteria	oBurkholderiales	fBurkholderiaceae	JAHBZM01	0.00897588	0.0120103	0.138644	0.149902	0.203042	0.162534	0.080492	0.0225334	0.0217639	0.043437	0.0843334	0.0691279	3430973	51.3323	1.72414
PS41_18_1_bin.7	dBacteria	pPseudomonadota	cAlphaproteobacteria	oRhizobiales	fXanthobacteraceae	Afipia	0.121281	0.139154	0.173635	0.103296	0.0980968	0.0962629	0.0403448	0.0370003	0.0380868	0.0361557	0.0883314	0.0463809	3976255	76.1194	5.19998
PS41_18_1_bin.9	dBacteria	pPseudomonadota	cGammaproteobacteria	oBurkholderiales	fBurkholderiaceae	LMDS01	0.0271978	0.0359093	0.259588	0.18426	0.136175	0.12528	0.0565027	0.0603058	0.0444217	0.0435967	0.0973238	0.0732052	3898133	72.235	4.37695
PS41_18_2_bin.10	dBacteria	pPseudomonadota	cGammaproteobacteria	oPseudomonadales	fPseudomonadaceae	Pseudomonas	0.596798	0.491737	0.161838	0.201145	0.234129	0.340114	0.147109	0.0511296	0.0524739	0.0714653	0.234794	0.17775	5215331	89.0351	2.81397
PS41_18_2_bin.12	dBacteria	pPseudomonadota	cAlphaproteobacteria	oMicavibrionales	fMicavibrionaceae	UBA1573	0.183928	0.106223	0.0523052	0.0917388	0.00718208	0.0103085	0.0268026	0.0347101	0.0342482	0.0427495	0.0590196	0.0514907	1711355	73.2006	0.978261
PS41_18_2_bin.13	dBacteria	pFusobacteriota	cFusobacteriia	oFusobacteriales	fFusobacteriaceae	Fusobacterium	0.133767	0.0211409	0.0136933	0.659112	0.000775006	0.000663699	0.0124111	0.000693453	0.000428124	0.00542513	0.0848109	0.195247	1963535	98.3146	0
PS41_18_2_bin.14	dBacteria	pChloroflexota	cAnaerolineae	oAnaerolineales	fEnvOPS12	UBA12294	0.0497783	0.0595836	0.0600691	0.127895	0.170767	0.216897	0.00720059	0.00510872	0.00614264	0.00853351	0.0711976	0.0719005	2789687	63.966	1.17355
PS41_18_2_bin.16	dBacteria	pPseudomonadota	cGammaproteobacteria	oBurkholderiales	fBurkholderiaceae	Aquabacterium	0.145101	0.139042	0.387929	0.313615	0.236138	0.21867	0.0329763	0.0406751	0.0561994	0.0508601	0.162121	0.117671	5243448	79.268	2.25857
PS41_18_2_bin.17	dBacteria	pSpirochaetota	cSpirochaetia	oTreponematales	fTreponemataceae	TreponemaB	0.0470957	0.00676746	0.00695441	0.281633	0.000736654	0.000917484	0.00461041	0.000268198	0.000176171	0.00183469	0.0350994	0.0832682	2709163	54.876	0.909091
PS41_18_2_bin.20	dBacteria	pPseudomonadota	cAlphaproteobacteria	oRhizobiales	fXanthobacteraceae	Afipia	0.0889802	0.103588	0.127981	0.137074	0.0899487	0.0868158	0.0356045	0.0309486	0.0309601	0.0309156	0.0762816	0.0392365	3074079	61.8174	1.63502
PS41_18_2_bin.22	dBacteria	pBdellovibrionota	cBdellovibrionia	oBdellovibrionales	fBdellovibrionaceae	Pseudobdellovibrio	0.000666441	0.00220302	0.0776637	0.154247	0.0214409	0.0273973	0.000912507	0.0113782	0.000846604	0.000435605	0.0297191	0.0472635	2578902	81.2012	3.003
PS41_18_2_bin.23	dBacteria	pActinomycetota	cActinomycetia	oActinomycetales	fActinomycetaceae	Pauljensenia	0.0986804	0.0164328	0.0112232	0.309755	0.00209037	0.00121026	0.0203774	0.000605376	0.000778963	0.00897255	0.0470127	0.0919145	1657238	81.18	4.01659
PS41_18_2_bin.26	dBacteria	pPseudomonadota	cGammaproteobacteria	oBurkholderiales	fBurkholderiaceae	Hydrogenophaga	0.525467	0.781228	4.03078	3.34873	1.18583	0.988039	0.756316	0.754895	0.708588	0.612435	1.36923	1.18326	4453441	94.7026	0.732087
PS41_18_2_bin.27	dBacteria	pBacteroidota	cBacteroidia	oBacteroidales	fPorphyromonadaceae	Porphyromonas	0.0534171	0.00815375	0.00764596	0.307195	0.000556241	0.000381941	0.00751154	0.00019337	0.00015577	0.00323512	0.0388446	0.0907334	1688246	82.8796	2.96122
PS41_18_2_bin.28	dBacteria	pPseudomonadota	cAlphaproteobacteria	oSphingomonadales	fSphingomonadaceae	Aquisediminimonas	0.260573	0.25998	0.113475	0.11599	0.184367	0.139683	0.0101098	0.0243142	0.00711431	0.00697987	0.112259	0.0949176	1834554	60.6825	0.797101
PS41_18_2_bin.37	dBacteria	pMyxococcota	cUBA9042	oGCA-2863065	fGCA-2863065	SXOO01	0.0611611	0.0424972	0.162098	0.335004	0.00734561	0.00902816	0.00316005	0.0198309	0.00397085	0.00263543	0.0646731	0.101383	7993744	88.615	7.92627
PS41_18_2_bin.40	dBacteria	pBacteroidota	cBacteroidia	oBacteroidales	fBacteroidaceae	Prevotella	0.0965608	0.0156182	0.00983958	0.366088	0.00111168	0.000677208	0.0123591	0.000918924	0.000544748	0.00519929	0.0508917	0.108613	2905347	95.9258	0.825826
PS41_18_2_bin.42	dBacteria	pPseudomonadota	cGammaproteobacteria	oBurkholderiales	fBurkholderiaceae	LMDS01	0.044489	0.0553331	0.33816	0.276374	0.219085	0.200705	0.0719596	0.0747122	0.0583679	0.0570448	0.139623	0.103214	4392356	73.6156	4.81288
PS41_18_2_bin.44	dBacteria	pNitrospirota	cNitrospiria	oNitrospirales	fNitrospiraceae	Palsa-1315	0.331357	0.525891	0.0975585	0.138131	0.301951	0.315836	0.0426672	0.0256213	0.0389217	0.0379349	0.185587	0.163367	2709338	81.0795	3.68687
PS41_18_2_bin.46	dBacteria	pPatescibacteria	cPaceibacteria	oUBA9983A	fEsbW-18	NA	0.137091	0.161323	0.0643453	0.109887	0.097583	0.10268	0.00470462	0.00807244	0.00171038	0.00315692	0.0690554	0.0578913	455493	83.72	0
PS41_18_2_bin.47	dBacteria	pPseudomonadota	cGammaproteobacteria	oBurkholderiales	fBurkholderiaceae	Rhodoferax	0.0553331	0.0596967	0.415615	0.356145	0.202637	0.164791	0.085298	0.0871635	0.0364491	0.0361471	0.149928	0.129284	4379881	54.023	7.82508
PS41_18_2_bin.48	dBacteria	pPatescibacteria	cPaceibacteria	oUBA9983A	fUBA5272	NA	0.00179016	0.0035268	0.0921926	0.146735	0.0315185	0.0347415	0.0106179	0.0106842	0.00844767	0.00801623	0.034827	0.0452547	452397	69.77	0
PS41_18_2_bin.49	dBacteria	pPseudomonadota	cGammaproteobacteria	oBurkholderiales	fBurkholderiaceae	Aquabacterium	0.826444	0.867254	0.0343835	0.0674988	0.0219966	0.022388	0.213292	0.2777	0.307916	0.303138	0.294201	0.297596	2055042	50.2347	2.37539
PS41_18_2_bin.6	dBacteria	pPseudomonadota	cGammaproteobacteria	oGa0077536	fGa0077536	JADJYF01	0.00908371	0.0120249	0.14395	0.163372	0.888804	0.846009	0.0293884	0.0223286	0.00248706	0.0116054	0.212905	0.331897	3419642	68.5642	2.00509
PS41_18_2_bin.7	dBacteria	pBacteroidota	cBacteroidia	oAKYH767	fB-17BO	JADJDM01	0.0426493	0.0224591	0.103274	0.1952	0.0130435	0.0226335	0.0008165	0.00993025	0.00120814	0.000637674	0.0411852	0.0590874	3433272	76.1481	1.98413
PS41_18_2_bin.8	dBacteria	pBacteroidota	cBacteroidia	oBacteroidales	fTannerellaceae	Tannerella	0.0309128	0.00483273	0.00504485	0.224724	0.000382688	0.000289995	0.00372802	0.000168652	0.000130787	0.00170428	0.0271918	0.0664291	1564861	52.9459	2.87896
PS41_30_1_bin.1	dBacteria	pPseudomonadota	cGammaproteobacteria	oBurkholderiales	fBurkholderiaceae	Aquabacterium	0.153404	0.14817	0.476217	0.367726	0.266233	0.23261	0.0503387	0.063526	0.0752027	0.0652731	0.18987	0.13728	5487652	73.1074	2.03438
PS41_30_1_bin.10	dBacteria	pMyxococcota	cJAADFL01	o	f	NA	0.00338159	0.0052468	0.0936658	0.100768	0.202908	0.125996	0.061387	0.015072	0.0131374	0.0317609	0.0653324	0.0620539	6189651	73.468	6.12135
PS41_30_1_bin.11	dBacteria	pVerrucomicrobiota	cVerrucomicrobiae	oPedosphaerales	fSXQI01	NA	0.0234001	0.019652	0.0169103	0.0245054	0.23055	0.202391	0.00702394	0.00214997	0.00450619	0.00629511	0.0537385	0.0819583	4965081	77.3914	2.7027
PS41_30_1_bin.12	dBacteria	pPseudomonadota	cGammaproteobacteria	oBurkholderiales	fBurkholderiaceae	Piscinibacter	0.0853207	0.0906097	0.186098	0.160654	0.368021	0.340659	0.107732	0.0215349	0.0235859	0.0567424	0.144096	0.11646	3519415	65.0387	1.39531
PS41_30_1_bin.14	dBacteria	pPseudomonadota	cAlphaproteobacteria	oSphingomonadales	fSphingomonadaceae	Sphingorhabus	0.00702459	0.00642591	0.00186431	0.00191611	0.0976109	0.0823213	0.0384883	0.00225573	0.00138128	0.0181248	0.0257413	0.0340487	2478870	77.2273	2.06379
PS41_30_1_bin.16	dBacteria	pPseudomonadota	cAlphaproteobacteria	oSphingomonadales	fSphingomonadaceae	Aquisediminimonas	0.0241489	0.0203498	0.0369083	0.04161	0.0680728	0.0447065	0.0266103	0.0118224	0.0126498	0.0174924	0.0304371	0.0166528	2237102	70.2462	2.14097
PS41_30_1_bin.17	dBacteria	pPseudomonadota	cAlphaproteobacteria	oRhizobiales	fDevosiaceae	Devosia	0.044158	0.0405322	0.0929308	0.0594314	0.323959	0.262916	0.0258125	0.012557	0.0099724	0.0150966	0.0887366	0.105946	3581560	79.8059	4.43989
PS41_30_1_bin.18	dBacteria	pCyanobacteriota	cVampirovibrionia	oObscuribacterales	fObscuribacteraceae	Ga0077546	0.00083537	0.0011637	0.0077362	0.0116793	0.402816	0.811959	0.257475	0.00581389	0.0031741	0.073636	0.157629	0.253974	7353711	96.1538	4.8433
PS41_30_1_bin.2	dBacteria	pBdellovibrionota	cBdellovibrionia	oBdellovibrionales	fBdellovibrionaceae	UBA2316	0.00209141	0.00319863	0.00597206	0.00723374	0.249607	0.45626	0.00761542	0.000419406	0.000372857	0.00321717	0.0735988	0.147133	3761915	94.37	2.02009
PS41_30_1_bin.20	dBacteria	pPlanctomycetota	cUBA1135	oUBA1135	fUBA1135	NA	0.0250721	0.0266938	0.029504	0.0289767	0.220531	0.173878	0.0137204	0.00280441	0.00172552	0.00568166	0.0528588	0.0736272	2688083	82.8906	2.21379
PS41_30_1_bin.21	dBacteria	pPseudomonadota	cGammaproteobacteria	oBurkholderiales	fBurkholderiaceae	Rhodoferax	0.0256886	0.0233813	0.0413498	0.0286191	0.20913	0.170531	0.0670437	0.0517382	0.0462107	0.0526717	0.0716364	0.0610861	4074155	75.3514	4.07321
PS41_30_1_bin.24	dBacteria	pPatescibacteria	cPaceibacteria	oUBA9983A	fUBA5272	UBA11704	0.0018141	0.00189006	0.000661235	0.00133993	1.3531	1.84716	0.229627	0.00320885	0.00160358	0.0865709	0.352697	0.637116	771292	97.67	0
PS41_30_1_bin.25	dBacteria	pAcidobacteriota	cVicinamibacteria	oFen-336	fJAGNNV01	JAGNNV01	0.0251713	0.0307606	0.0301837	0.023568	0.230743	0.195579	0.0095233	0.00621446	0.00508288	0.00592183	0.0562749	0.0794114	3125966	53.7583	3.04487
PS41_30_1_bin.26	dBacteria	pBacteroidota	cBacteroidia	oChitinophagales	fSaprospiraceae	NA	0.0125426	0.0122418	0.03952	0.0491724	0.206694	0.216387	0.0217637	0.00351022	0.00556428	0.0137991	0.0581195	0.0779496	4598538	85.077	1.92519
PS41_30_1_bin.29	dBacteria	pPseudomonadota	cAlphaproteobacteria	oMicavibrionales	fMicavibrionaceae	UBA1672	0.000295344	0.000434862	0.000168199	0.000294564	0.150065	0.130172	0.0454836	0.000646811	0.000272759	0.0220217	0.0349855	0.0545702	2060389	80.1748	2.49934
PS41_30_1_bin.30	dBacteria	pPatescibacteria	cPaceibacteria	oMoranbacterales	fUBA1568	UBA1568	0.00146223	0.00145252	0.00377585	0.00435769	0.418908	0.178084	0.00689822	0.00161881	0.00195093	0.00459678	0.0623106	0.129802	741644	88.37	0
PS41_30_1_bin.31	dBacteria	pMyxococcota	cPolyangia	oHaliangiales	fHaliangiaceae	JABFXX01	0.00500443	0.00587778	0.0325402	0.0274943	0.232448	0.195411	0.0618317	0.00664516	0.00479828	0.0277318	0.0599782	0.0792321	9377040	73.9872	0.877193
PS41_30_1_bin.33	dBacteria	pBacteroidota	cBacteroidia	oChitinophagales	fSaprospiraceae	JAAFJT01	0.00459376	0.00403731	0.00246788	0.0044017	0.116849	0.14823	0.0238929	0.000840454	0.000666654	0.0109821	0.0316962	0.0513174	5402207	78.1188	1.48515
PS41_30_1_bin.35	dBacteria	pChloroflexota	cLimnocylindria	oLimnocylindrales	fCSP1-4	CAKKPP01	0.0739775	0.123938	0.0917164	0.0633636	0.391476	0.248458	0.0209722	0.0166873	0.0106593	0.0147832	0.105603	0.117378	3303023	94.2284	1.77984
PS41_30_1_bin.38	dBacteria	pPseudomonadota	cGammaproteobacteria	oPseudomonadales	fPseudomonadaceae	Pseudomonas	0.628585	0.535286	0.162117	0.181544	0.266579	0.373936	0.152779	0.0514191	0.0529396	0.0744107	0.24796	0.192683	5747729	95.9948	1.82426
PS41_30_1_bin.39	dBacteria	pMyxococcota	cUBA796	oUBA796	fSXON01	NA	0.00444282	0.00580646	0.0696093	0.0478085	0.1457	0.183285	0.0101581	0.00425178	0.00260146	0.00528862	0.0478952	0.0626283	4822984	72.9665	1.75439
PS41_30_1_bin.4	dBacteria	pMyxococcota	cMyxococcia	oMyxococcales	fMyxococcaceae	JAEUJQ01	0.00881802	0.0103514	0.0524513	0.0397231	0.163742	0.111284	0.0246257	0.00976555	0.00861006	0.0140031	0.0443374	0.0500234	6055538	68.0978	2.35279
PS41_30_1_bin.40	dBacteria	pNitrospirota	cNitrospiria	oNitrospirales	fNitrospiraceae	Nitrospira	0.704411	0.837125	0.12063	0.141167	0.191492	0.198644	0.0847668	0.0591715	0.113309	0.0894478	0.254017	0.263413	2595216	92.25	3.48485
PS41_30_1_bin.43	dBacteria	pPseudomonadota	cGammaproteobacteria	oBurkholderiales	fBurkholderiaceae	Aquabacterium	0.151782	0.160284	0.3162	0.270561	0.0952916	0.078497	0.0392192	0.0329772	0.0150678	0.0200695	0.117995	0.10059	4447837	72.6223	2.80374
PS41_30_1_bin.44	dBacteria	pPseudomonadota	cAlphaproteobacteria	oVGDZ01	f	NA	0.109788	0.103392	0.103192	0.0811679	0.272866	0.19689	0.00711732	0.00674415	0.00398414	0.00494374	0.0890085	0.0860889	5723008	80.2484	5.15942
PS41_30_1_bin.46	dBacteria	pPseudomonadota	cAlphaproteobacteria	oRhizobiales	fXanthobacteraceae	Afipia	0.133322	0.191134	0.135231	0.128273	0.125622	0.0894539	0.0377699	0.0504674	0.0364105	0.0326306	0.0960314	0.0519373	3312077	54.685	0.316456
PS41_30_1_bin.48	dBacteria	pNitrospirota	cNitrospiria	oNitrospirales	fNitrospiraceae	Palsa-1315	0.177879	0.269575	0.0356702	0.0554094	0.147662	0.191645	0.0237016	0.012793	0.0225909	0.0233251	0.0960251	0.0876114	3256214	61.9937	3.0303
PS41_30_1_bin.49	dBacteria	pPseudomonadota	cGammaproteobacteria	oEnterobacteralesA	fDSM-103792	NA	0.0873135	0.109142	0.0354161	0.0419156	0.113483	0.110461	0.0114076	0.00787481	0.00842388	0.0109031	0.0536341	0.0438666	2265808	51.3921	7.44792
PS41_30_1_bin.5	dBacteria	pBacteroidota	cBacteroidia	oChitinophagales	fChitinophagaceae	VBAR01	0.122804	0.113993	0.101987	0.168366	0.654233	1.13349	0.026947	0.0105632	0.00649459	0.0144502	0.235333	0.350275	4677333	98.9874	0
PS41_30_1_bin.53	dBacteria	pPseudomonadota	cAlphaproteobacteria	oCaulobacterales	fTH1-2	Vitreimonas	0.0121125	0.0123671	0.017096	0.0165084	0.214787	0.1679	0.0419786	0.00541961	0.00643238	0.0192637	0.0513865	0.0714049	2343462	54.0304	7.10666
PS41_30_1_bin.54	dBacteria	pPlanctomycetota	cPlanctomycetia	oPlanctomycetales	fPlanctomycetaceae	SXXK01	0.00715002	0.006682	0.0128599	0.011873	0.437401	0.389747	0.0104332	0.00185749	0.000780094	0.0044755	0.0883259	0.163016	8241817	91.7623	0.40858
PS41_30_1_bin.56	dBacteria	pVerrucomicrobiota	cVerrucomicrobiae	oOpitutales	fOpitutaceae	Lacunisphaera	0.052111	0.0586012	0.0783125	0.0846359	0.498639	0.445599	0.0393716	0.0260675	0.0435638	0.0480364	0.137494	0.168533	2263496	86.0923	4.43164
PS41_30_1_bin.57	dBacteria	pPseudomonadota	cGammaproteobacteria	oBurkholderiales	fBurkholderiaceae	JAHBZM01	0.0114396	0.0149106	0.145464	0.174418	0.236874	0.183202	0.0904838	0.0260828	0.0253945	0.0494788	0.0957747	0.0786379	3951188	76.6758	1.29283
PS41_30_1_bin.59	dBacteria	pPseudomonadota	cAlphaproteobacteria	oRhizobiales	fRhizobiaceae	Mesorhizobium	0.00386717	0.00618786	0.0750865	0.0118959	0.315277	0.260689	0.103556	0.00368916	0.00369251	0.0473612	0.0831302	0.108203	3138481	63.7365	1.1612
PS41_30_1_bin.6	dBacteria	pPseudomonadota	cGammaproteobacteria	oGa0077536	fGa0077536	JADJYF01	0.00821287	0.0105242	0.123417	0.0963165	0.806616	0.7212	0.0255935	0.019178	0.00199319	0.0102377	0.182329	0.293962	3011698	62.7397	1.49648
PS41_30_1_bin.60	dBacteria	pAcidobacteriota	cBlastocatellia	oPyrinomonadales	fPyrinomonadaceae	JAIBCC01	0.00621902	0.00874438	0.00307803	0.00658129	3.05878	3.92589	0.985117	0.014443	0.00474924	0.472152	0.848575	1.36973	6065969	96.5812	4.32099
PS41_30_1_bin.61	dBacteria	pPseudomonadota	cGammaproteobacteria	oBurkholderiales	fBurkholderiaceae	CAISIP01	0.0968151	0.106326	0.213142	0.15594	1.18717	0.838442	0.0239283	0.0378321	0.0107339	0.0150679	0.26854	0.385227	6267953	97.4104	0.498442
PS41_30_1_bin.62	dBacteria	pEisenbacteria	cRBG-16-71-46	oSZUA-252	fSZUA-252	SZUA-252	0.0748123	0.0967052	0.0858128	0.0766735	0.373573	0.3134	0.0169309	0.0139066	0.00734133	0.010973	0.107013	0.123331	3079454	91.7582	2.5641
PS41_30_1_bin.64	dBacteria	pBacteroidota	cUBA10030	oUBA10030	fSZUA-254	NA	0.0341503	0.0351516	0.0219569	0.0365205	0.138754	0.170327	0.0244307	0.0126278	0.0506095	0.046822	0.057135	0.0503462	2663712	67.0591	5.13661
PS41_30_1_bin.65	dBacteria	pPseudomonadota	cGammaproteobacteria	oBurkholderiales	fBurkholderiaceae	LMDS01	0.0243283	0.032146	0.226151	0.167796	0.148331	0.117526	0.0521929	0.0544052	0.040259	0.0394243	0.090256	0.0664357	3626734	73.2631	2.76778
PS41_30_1_bin.66	dBacteria	pPseudomonadota	cGammaproteobacteria	oBurkholderiales	fBurkholderiaceae	Hydrogenophaga	0.367793	0.538364	3.10464	2.58738	1.44422	1.222	0.620072	0.573423	0.507847	0.477608	1.14433	0.918792	4486323	89.9526	0.83774
PS41_30_1_bin.67	dBacteria	pBacteroidota	cBacteroidia	oChitinophagales	fChitinophagaceae	Ferruginibacter	0.0849942	0.0864195	0.0254578	0.0483492	0.219074	0.392132	0.0418629	0.0146226	0.0341186	0.0555952	0.100263	0.111864	3495654	94.5813	0.492611
PS41_30_1_bin.70	dBacteria	pBacteroidota	cBacteroidia	oChitinophagales	fChitinophagaceae	JJ008	0.0436826	0.0382642	0.0340501	0.0484358	0.596922	0.629066	0.0337049	0.0212523	0.063711	0.0409366	0.155003	0.229343	3712874	96.0591	0.0273673
PS41_30_1_bin.73	dArchaea	NA	NA	NA	NA	NA	0.190629	0.103331	0.0313164	0.0410525	0.141253	0.203774	0.0689306	0.0133098	0.0160518	0.0289544	0.0838603	0.0684531	4016478	76.6581	7.51654
PS41_30_1_bin.74	dBacteria	pBacteroidota	cBacteroidia	oFlavobacteriales	fFlavobacteriaceae	Flavobacterium	0.00284009	0.00356905	0.00152391	0.00165091	0.140665	0.123777	0.0819246	0.00453883	0.00542251	0.0358162	0.0401728	0.0519991	3866615	89.2003	3.78664
PS41_30_1_bin.75	dBacteria	pPseudomonadota	cGammaproteobacteria	oXanthomonadales	fXanthomonadaceae	SCMT01	0.188896	0.218779	0.0523898	0.102327	0.296946	0.333861	0.0133406	0.00827453	0.00877738	0.0108007	0.123439	0.120196	665431	55.8003	4.36893
PS41_30_1_bin.78	dArchaea	NA	NA	NA	NA	NA	0.00995916	0.0104184	0.0750168	0.0605439	0.507889	0.444615	0.0609342	0.0264339	0.0237176	0.0363665	0.125589	0.177117	2052840	93.4066	0
PS41_30_1_bin.8	dBacteria	pPseudomonadota	cAlphaproteobacteria	oRickettsiales	fUBA3002	QFOX01	0.803477	0.650015	0.312982	0.294131	0.117174	0.0907169	0.00991036	0.0281452	0.0167449	0.0136678	0.233696	0.270137	7236780	64.5714	1.64875
PS41_30_1_bin.80	dBacteria	pMyxococcota	cMyxococcia	oMyxococcales	fMyxococcaceae	Archangium	0.00915845	0.0103057	0.092247	0.0744604	0.22025	0.153218	0.0511667	0.0141703	0.0241986	0.0368981	0.0686073	0.0662766	7591951	79.7696	4.0553
PS41_30_1_bin.81	dBacteria	pMyxococcota	cUBA796	oUBA796	fSXON01	NA	0.00153632	0.00105565	0.00660976	0.00403356	0.159968	0.165894	0.059678	0.00180645	0.00119842	0.0246629	0.0426443	0.0625804	8349532	90.7552	2.92627
PS41_30_1_bin.83	dBacteria	pMyxococcota	cMyxococcia	oMyxococcales	fMyxococcaceae	JAEUJT01	0.0239756	0.027844	0.168258	0.138261	0.769846	0.698802	0.318262	0.0547614	0.0689383	0.155176	0.242412	0.259855	4397821	97.6448	0.316456
PS41_30_1_bin.86	dBacteria	pPseudomonadota	cAlphaproteobacteria	oRhizobiales	fXanthobacteraceae	Afipia	0.0222393	0.0196917	0.0112043	0.0164575	0.179301	0.259024	0.0111337	0.00148588	0.0010389	0.00389936	0.0525475	0.0854698	4904246	52.7645	1.95652
PS41_30_1_bin.87	dBacteria	pAcidobacteriota	cTerriglobia	oBryobacterales	fBryobacteraceae	Ga0077553	0.0118636	0.0114178	0.0131124	0.0160981	0.330336	0.391142	0.0618664	0.00296713	0.00248798	0.0256638	0.0866955	0.13862	1391205	59.8328	6.26959
PS41_30_1_bin.88	dBacteria	pPatescibacteria	cPaceibacteria	oUBA9983A	fUBA918	OLB19	0.00454019	0.00706233	0.0828835	0.0665628	0.215069	0.116606	0.00527698	0.0133596	0.00344481	0.00393684	0.0518743	0.0667434	1378050	53.49	4.65
PS41_30_1_bin.9	dBacteria	pPseudomonadota	cGammaproteobacteria	oPseudomonadales	fPorticoccaceae	JAGPUQ01	0.0218593	0.0300002	0.0840122	0.0607017	0.468008	0.256405	0.0351427	0.0241473	0.0057517	0.0167292	0.100276	0.140881	5607074	86.9706	8.80515
PS41_30_2_bin.10	dBacteria	pActinomycetota	cAcidimicrobiia	oAcidimicrobiales	f	NA	0.324763	0.518918	0.0954232	0.1165	0.299538	0.332445	0.0399294	0.0232509	0.0344218	0.0336584	0.181885	0.164712	2568322	76.7109	2.72727
PS41_30_2_bin.11	dBacteria	pNitrospirota	cNitrospiria	oNitrospirales	fNitrospiraceae	Palsa-1315	0.00557171	0.00741422	0.0764846	0.0888488	0.202158	0.309852	0.0874127	0.0130497	0.0101776	0.0357415	0.0836711	0.0948103	5479577	93.5119	1.1421
PS41_30_2_bin.12	dBacteria	pPseudomonadota	cGammaproteobacteria	oBurkholderiales	fBurkholderiaceae	Herbaspirillum	0.162643	0.169993	0.324996	0.28342	0.105466	0.112596	0.0419566	0.0352386	0.0193867	0.0245183	0.128021	0.10256	4290030	64.6719	2.34424
PS41_30_2_bin.15	dBacteria	pPseudomonadota	cGammaproteobacteria	oBurkholderiales	fBurkholderiaceae	Aquabacterium	0.0536513	0.070335	0.750137	0.405826	5.43055	5.44902	0.987332	0.162207	0.142902	0.432444	1.38844	2.0457	7150983	98.9428	1.56522
PS41_30_2_bin.19	dBacteria	pPseudomonadota	cGammaproteobacteria	oBurkholderiales	fBurkholderiaceae	Ideonella	0.155431	0.236282	0.0285338	0.050943	0.123049	0.210184	0.0220518	0.0105299	0.0188946	0.0220317	0.0877931	0.0819017	3291872	64.9596	3.48485
PS41_30_2_bin.2	dBacteria	pNitrospirota	cNitrospiria	oNitrospirales	fNitrospiraceae	Palsa-1315	5.23928	4.86976	2.57616	4.352	1.22214	1.52672	0.540906	0.533906	0.429019	0.398617	2.16885	1.85599	1330894	67.094	0
PS41_30_2_bin.21	dBacteria	pPatescibacteria	JAEDAM01	oBD1-5	pPatescibacteria	JABFSX01	0.0382459	0.0601699	1.03053	0.899503	0.675394	0.605607	0.0230433	0.154054	0.0128905	0.0125123	0.351195	0.386044	1925440	67.3981	8.62069
PS41_30_2_bin.22	dBacteria	pPseudomonadota	cAlphaproteobacteria	oUBA11222	fUBA11222	UBA11222	0.00491456	0.00416554	0.00242263	0.00464923	0.100573	0.184371	0.0249449	0.000802596	0.00055946	0.0114828	0.0338886	0.0578337	5725668	74.5792	2.84928
PS41_30_2_bin.23	dBacteria	pBacteroidota	cBacteroidia	oChitinophagales	fSaprospiraceae	JAAFJT01	0.368006	0.357548	1.06457	0.697184	1.70715	1.43	0.157883	0.11036	0.0494521	0.0802766	0.602243	0.571046	5952836	98.3353	0.983768
PS41_30_2_bin.24	dBacteria	pPseudomonadota	cGammaproteobacteria	oBurkholderiales	fBurkholderiaceae	Rubrivivax	0.00610112	0.0077299	0.0169224	0.0134837	0.190952	0.177262	0.0661898	0.00905834	0.0078594	0.0267182	0.0522276	0.0681256	3344055	71.4037	3.16978
PS41_30_2_bin.25	dBacteria	pPseudomonadota	cGammaproteobacteria	oBurkholderiales	fBurkholderiaceae	Polaromonas	0.026664	0.0474343	0.748611	0.827787	2.28401	1.95556	0.0502331	0.134129	0.00986329	0.0249115	0.61092	0.811081	3135127	99.5652	0
PS41_30_2_bin.26	dBacteria	pPseudomonadota	cAlphaproteobacteria	oUBA11222	fUBA11222	UBA11222	0.0814537	0.0874638	0.18079	0.152615	0.316144	0.375288	0.102132	0.0215034	0.02497	0.0552432	0.13976	0.114144	3365534	55.768	0.862069
PS41_30_2_bin.27	dBacteria	pPseudomonadota	cGammaproteobacteria	oBurkholderiales	fBurkholderiaceae	Piscinibacter	0.00168278	0.00119551	0.00614791	0.00383278	0.132782	0.181749	0.0554275	0.00167171	0.00113258	0.0228697	0.0408491	0.061346	7671242	78.3528	3.15924
PS41_30_2_bin.28	dBacteria	pMyxococcota	cMyxococcia	oMyxococcales	fMyxococcaceae	JAEUJT01	0.0227295	0.0201182	0.0109256	0.0165792	0.150213	0.29735	0.0111844	0.00155226	0.000968943	0.00393427	0.0535555	0.0915196	5405339	58.5624	0.986842
PS41_30_2_bin.3	dBacteria	pAcidobacteriota	cTerriglobia	oBryobacterales	fBryobacteraceae	Ga0077553	0.175159	0.0919918	0.0299813	0.0386978	0.104385	0.272714	0.0740458	0.0127741	0.0156589	0.0297266	0.0845135	0.0788407	4242590	52.5862	3.44828
PS41_30_2_bin.30	dBacteria	pBacteroidota	cBacteroidia	oFlavobacteriales	fFlavobacteriaceae	Flavobacterium	0.00544736	0.00629524	0.0298982	0.0255683	0.198153	0.195887	0.0530375	0.00602078	0.00415412	0.0235662	0.0548028	0.0725547	7976331	56.5115	2.60369
PS41_30_2_bin.31	dBacteria	pMyxococcota	cPolyangia	oHaliangiales	fHaliangiaceae	JABFXX01	0.0588941	0.0700202	0.0703618	0.1224	0.203467	0.276397	0.00763879	0.00552139	0.00559765	0.00814842	0.0828446	0.0881205	3638553	87.7273	2.30303
PS41_30_2_bin.32	dBacteria	pChloroflexota	cAnaerolineae	oAnaerolineales	fEnvOPS12	UBA12294	0.0608362	0.0537425	0.377845	0.38524	0.860199	0.858401	0.0223278	0.0215541	0.00403047	0.00968598	0.265386	0.327313	5520844	97.8079	3.41493
PS41_30_2_bin.33	dBacteria	pPseudomonadota	cGammaproteobacteria	oGa0077536	fGa0077536	NA	0.020393	0.0166561	0.0148367	0.0214748	0.170875	0.224212	0.00579004	0.00177466	0.00401095	0.00510202	0.0485125	0.0757548	4098697	61.9283	1.76868
PS41_30_2_bin.34	dBacteria	pVerrucomicrobiota	cVerrucomicrobiae	oPedosphaerales	fSXQI01	NA	0.00279755	0.0040509	0.00548787	0.00498691	0.594648	0.435257	0.261648	0.00585013	0.00635556	0.109841	0.143092	0.20469	5670901	94.4444	2.13675
PS41_30_2_bin.36	dBacteria	pActinomycetota	cAcidimicrobiia	oAcidimicrobiales	fIlumatobacteraceae	NA	0.054848	0.0606492	0.0786476	0.0866554	0.465697	0.519003	0.0417344	0.0275762	0.044634	0.0502143	0.142966	0.175853	2306876	86.5759	0.675676
PS41_30_2_bin.41	dBacteria	pVerrucomicrobiota	cVerrucomicrobiae	oOpitutales	fOpitutaceae	Lacunisphaera	0.131509	0.192491	2.36923	1.91907	2.98162	2.48838	0.663989	0.418488	0.278353	0.408598	1.18517	1.0605	3698796	81.0685	0
PS41_30_2_bin.42	dBacteria	pPseudomonadota	cGammaproteobacteria	oBurkholderiales	fBurkholderiaceae	Hydrogenophaga	0.0029515	0.00409349	0.00211677	0.00368579	0.0894513	0.222619	0.0103796	0.000731972	0.000675607	0.00385752	0.0340562	0.0679188	1049297	67.1526	5.48589
PS41_30_2_bin.45	dBacteria	pPatescibacteria	cPaceibacteria	oUBA9983A	fPALSA-1337	CAIOGI01	0.00311468	0.00496894	0.088072	0.0942047	0.151957	0.1883	0.0587628	0.0142763	0.0122271	0.0301351	0.0646019	0.0618013	5430639	81.4	2.33
PS41_30_2_bin.46	dBacteria	pMyxococcota	c	o	f	NA	0.00884455	0.0103514	0.0472309	0.0364773	0.0949586	0.157781	0.021079	0.0088805	0.00749706	0.0122648	0.0405365	0.0468576	4022331	51.0722	2.21454
PS41_30_2_bin.47	dBacteria	pMyxococcota	cMyxococcia	oMyxococcales	fMyxococcaceae	JAEUJQ01	0.83131	1.11092	4.18633	3.15501	1.95887	1.7393	0.117022	0.253718	0.0552329	0.0706685	1.34784	1.34857	5156210	99.3808	0.556854
PS41_30_2_bin.48	dBacteria	pPseudomonadota	cGammaproteobacteria	oBurkholderiales	fBurkholderiaceae	RubrivivaxA	0.124213	0.172965	0.984339	0.865732	2.77738	2.25375	1.15614	0.217267	0.15676	0.548818	0.925736	0.87731	5217299	98.3489	0.46729
PS41_30_2_bin.49	dBacteria	pPseudomonadota	cGammaproteobacteria	oBurkholderiales	fBurkholderiaceae	JADJDQ01	0.00830017	0.010498	0.118633	0.0791787	0.786315	0.623364	0.267947	0.0324846	0.0274962	0.129583	0.20838	0.261452	8295952	90.7527	4.37788
PS41_30_2_bin.51	dBacteria	pMyxococcota	cUBA727	oUBA727	fVGSZ01	VGSZ01	0.0811275	0.102244	0.0346394	0.0389046	0.0700809	0.178303	0.00565221	0.00224686	0.000753127	0.00540208	0.0519354	0.0543565	2264883	57.212	3.83398
PS41_30_2_bin.53	dBacteria	pPseudomonadota	cGammaproteobacteria	oEnterobacteralesA	fDSM-103792	NA	0.00342768	0.00451554	0.0024171	0.00227091	0.110701	0.126965	0.0675735	0.00394044	0.00477447	0.029561	0.0356147	0.0460568	3069759	72.0305	2.85495
PS41_30_2_bin.55	dBacteria	pPseudomonadota	cGammaproteobacteria	oXanthomonadales	fXanthomonadaceae	SCMT01	0.13468	0.129131	0.364052	0.278334	0.221007	0.225671	0.0314877	0.0370258	0.0524662	0.0478929	0.152175	0.109739	4728463	64.0891	1.11955
PS41_30_2_bin.56	dBacteria	pPseudomonadota	cGammaproteobacteria	oBurkholderiales	fBurkholderiaceae	Aquabacterium	0.0241752	0.0245423	0.0500403	0.0741138	0.131651	0.283326	0.0672525	0.0111941	0.00924067	0.0271883	0.0702725	0.079297	3033800	63.1678	2.85714
PS41_30_2_bin.59	dBacteria	pBacteroidota	cBacteroidia	oCytophagales	fCyclobacteriaceae	ELB16-189	0.19059	0.193914	1.10791	0.911268	1.46465	1.37144	0.270983	0.195266	0.173875	0.185493	0.606538	0.515282	5813232	95.306	2.463
PS41_30_2_bin.60	dBacteria	pPseudomonadota	cGammaproteobacteria	oBurkholderiales	fBurkholderiaceae	Ideonella	0.0341306	0.035231	0.02151	0.0365271	0.112522	0.208058	0.0242068	0.0123851	0.0517768	0.0465265	0.0582874	0.0563588	2693454	65.4752	4.89485
PS41_30_2_bin.63	dBacteria	pBacteroidota	cUBA10030	oUBA10030	fSZUA-254	NA	0.000493824	0.00103904	8.46475e-05	0.00021566	0.305688	0.941999	0.038991	0.000929592	0.000582198	0.0164481	0.130639	0.284941	601879	51.6507	0.854701
PS41_30_2_bin.65	dBacteria	pPatescibacteria	cPaceibacteria	oUBA9983A	fUBA5272	UBA11704	0.0126516	0.0125237	0.0398032	0.0503038	0.181763	0.265813	0.0219535	0.00344886	0.00565916	0.0138802	0.06078	0.0847954	4773791	79.07	2.33
PS41_30_2_bin.68	dBacteria	pBacteroidota	cBacteroidia	oChitinophagales	fSaprospiraceae	NA	0.0252658	0.0340162	0.215544	0.162833	0.122009	0.146242	0.0494591	0.0522947	0.0387353	0.03887	0.0885269	0.0639252	3133646	61.0025	3.93302
PS41_30_2_bin.69	dBacteria	pPseudomonadota	cGammaproteobacteria	oBurkholderiales	fBurkholderiaceae	LMDS01	0.0265796	0.0248594	0.0650131	0.0365294	0.202436	0.233323	0.0282992	0.0086502	0.0069787	0.0159944	0.0648663	0.0783641	1796492	50.9144	3.31325
PS41_30_2_bin.7	dBacteria	pPseudomonadota	cAlphaproteobacteria	oRhizobiales	fDevosiaceae	Devosia	0.00610453	0.00729256	0.0861369	0.0610429	0.170952	0.245551	0.0141098	0.00559862	0.00394531	0.00770669	0.060844	0.0800259	5451097	72.4117	2.58065
PS41_30_2_bin.70	dBacteria	pMyxococcota	cUBA796	oUBA796	fSXON01	NA	0.000383749	0.000436631	0.000189664	0.000331711	0.103646	0.138198	0.0362601	0.000630194	0.000306699	0.0178011	0.0298184	0.0475211	1465165	51.2411	1.26812
PS41_30_2_bin.71	dBacteria	pPseudomonadota	cAlphaproteobacteria	oMicavibrionales	fMicavibrionaceae	UBA1672	0.02066	0.0205441	0.0136302	0.0200013	0.131457	0.286444	0.00872926	0.00207446	0.00333253	0.00525604	0.0512128	0.0864045	4357949	58.8245	7.39289
PS41_30_2_bin.72	dBacteria	pAcidobacteriota	cBlastocatellia	oRBC074	fRBC074	JACPYM01	0.515165	0.402928	0.0681418	0.241715	0.300126	0.43418	0.0646597	0.049246	0.0400149	0.0532025	0.216938	0.176017	781667	56.1115	3.79637
PS41_30_2_bin.73	dBacteria	pPatescibacteria	cABY1	oSG8-24	fUBA9934	CAIKHN01	0.00158796	0.00245807	0.000856879	0.00198658	0.267943	0.332756	0.0389313	0.0013189	0.0016047	0.0161366	0.0665579	0.118327	969550	76.74	0
PS41_30_2_bin.74	dBacteria	pMyxococcota	cUBA796	oUBA796	fSXON01	NA	0.00694566	0.00829144	0.0743684	0.0581441	0.161709	0.177229	0.0318609	0.0093544	0.0146422	0.022362	0.0564906	0.0604096	5425512	53.2826	7.33231
PS41_30_2_bin.75	dBacteria	pPlanctomycetota	cUBA1135	oUBA1135	fUBA1135	NA	0.020353	0.0213422	0.023306	0.024051	0.171829	0.174629	0.0108682	0.00229041	0.00140375	0.00430708	0.0454379	0.0644278	1933451	61.0038	1.17302
PS41_30_2_bin.9	dBacteria	pPseudomonadota	cGammaproteobacteria	oGa0077536	fGa0077536	JADJYF01	0.00784893	0.010472	0.122381	0.0969536	0.762111	0.772973	0.025643	0.0190158	0.0020417	0.00999742	0.182944	0.294837	3136782	64.6089	1.29108
PS52_06_1_bin.1	dBacteria	pPseudomonadota	cGammaproteobacteria	oBurkholderiales	fBurkholderiaceae	Rhodoferax	0.150093	0.131222	0.040914	0.0442409	0.0120939	0.00995689	0.179689	0.196772	0.274442	0.250533	0.128996	0.0929072	3049131	54.693	3.48576
PS52_06_1_bin.14	dBacteria	pNitrospirota	cRBG-16-64-22	oRBG-16-64-22	fRBG-16-64-22	RBG-16-64-22	0.000886281	0.00105896	0.00053967	0.000568028	0.00116907	0.00120566	0.0761694	0.0387751	0.152375	0.103146	0.0375893	0.0519983	1854344	63.3535	1.21212
PS52_06_1_bin.15	dBacteria	pPlanctomycetota	cBrocadiia	oBrocadiales	fBrocadiaceae	JACVXV01	0.00142466	0.00187926	0.000298161	0.000533641	0.000965651	0.00114971	0.0895653	0.0668431	0.340204	0.280168	0.0783032	0.120589	2543172	71.9584	3.66104
PS52_06_1_bin.18	dBacteria	pPseudomonadota	cGammaproteobacteria	oBurkholderiales	fBurkholderiaceae	Undibacterium	0.159732	0.186158	0.00427483	0.00704103	0.00350576	0.00348806	1.1037	1.39584	0.50182	0.407971	0.377353	0.471286	4546694	98.0175	0.498008
PS52_06_1_bin.19	dBacteria	pPseudomonadota	cGammaproteobacteria	oBurkholderiales	fSCOH01	NA	0.0377932	0.0172356	0.00244178	0.00288261	0.00251948	0.00277154	0.0949136	0.115305	0.25976	0.547544	0.108317	0.165533	3159108	73.3073	2.5641
PS52_06_1_bin.20	dBacteria	pPseudomonadota	cGammaproteobacteria	oBurkholderiales	fBurkholderiaceae	Aquabacterium	0.461955	0.282226	0.0386189	0.0475827	0.0189049	0.0176856	0.828614	0.993802	0.832693	1.08557	0.460765	0.41479	3711717	98.5556	0
PS52_06_1_bin.21	dBacteria	pPseudomonadota	cGammaproteobacteria	oXanthomonadales	fXanthomonadaceae	SCMT01	0.00217893	0.00300666	0.00165839	0.00136849	0.104129	0.098505	0.0801806	0.0038122	0.00487844	0.0284343	0.0328152	0.0413182	2815056	67.7136	2.99048
PS52_06_1_bin.22	dBacteria	pPseudomonadota	cGammaproteobacteria	oBurkholderiales	fBurkholderiaceae	Rhodoferax	0.0393626	0.0380215	0.0389154	0.0277479	0.0276708	0.0233137	0.618237	0.206337	0.0427652	0.0456394	0.110801	0.176783	4157240	80.9806	1.38629
PS52_06_1_bin.23	dBacteria	pPseudomonadota	cGammaproteobacteria	oBurkholderiales	fBurkholderiaceae	Aquabacterium	0.648282	0.683207	0.0259072	0.0318247	0.0167207	0.0176369	0.259466	0.321184	0.383638	0.372987	0.276085	0.241633	2343415	54.3103	1.72414
PS52_06_1_bin.24	dBacteria	pPseudomonadota	cGammaproteobacteria	oBurkholderiales	fBurkholderiaceae	Rhodoferax	0.0465899	0.0512677	0.00662846	0.00614021	0.051625	0.0494645	0.758012	0.609675	0.176171	0.156712	0.191229	0.254203	4421438	91.3451	3.75974
PS52_06_1_bin.25	dBacteria	pPseudomonadota	cGammaproteobacteria	oBurkholderiales	fGallionellaceae	Gallionella	0.00767491	0.00642296	0.00117317	0.00147909	0.00233327	0.00301299	0.372261	0.211089	0.216777	0.201287	0.102351	0.128843	2656239	82.3341	2.28141
PS52_06_1_bin.27	dBacteria	pBacteroidota	cBacteroidia	oFlavobacteriales	fFlavobacteriaceae	Flavobacterium	0.164475	0.105578	0.0340288	0.0493238	0.0890538	0.169008	0.0970939	0.0162826	0.0181963	0.0282459	0.0771286	0.0544214	3375274	52.3967	9.02415
PS52_06_1_bin.29	dBacteria	pAcidobacteriota	cHolophagae	oHolophagales	fHolophagaceae	Holophaga	0.00179995	0.00284799	0.00051863	0.000513648	0.0014975	0.00139154	0.274239	0.145778	0.026333	0.0457861	0.0500706	0.0861358	4063171	82.6511	4.88426
PS52_06_1_bin.3	dBacteria	pBacteroidota	cBacteroidia	oChitinophagales	fChitinophagaceae	Ferruginibacter	0.0228608	0.0222973	0.00731673	0.0150597	0.0695982	0.147498	0.0953557	0.0473034	0.133453	0.194295	0.0755038	0.0614671	3371265	96.0263	1.88834
PS52_06_1_bin.30	dBacteria	pPlanctomycetota	cUBA1135	oUBA1135	fJACQFD01	JACQFD01	0.00145733	0.00142023	0.000821834	0.000993221	0.00341122	0.0039423	0.279967	0.121447	0.148331	0.176338	0.0738129	0.0958006	4389473	85.5392	3.5124
PS52_06_1_bin.32	dBacteria	pCampylobacterota	cCampylobacteria	oCampylobacterales	fSulfurimonadaceae	Sulfuricurvum	0.00296121	0.0034735	6.03849e-05	0.00019909	0.000134756	0.000170633	0.146069	0.0534241	0.00664368	0.0101743	0.0223251	0.0440138	1239036	54.5574	1.22951
PS52_06_1_bin.34	dBacteria	pPseudomonadota	cGammaproteobacteria	oBurkholderiales	fBurkholderiaceae	Rubrivivax	0.247469	0.241511	0.733291	0.455236	1.16731	0.95438	0.115631	0.0736866	0.0308429	0.0507535	0.407011	0.387779	4031287	72.0529	2.42335
PS52_06_1_bin.35	dBacteria	pPatescibacteria	JAEDAM01	oBD1-5	pPatescibacteria	NA	0.00113727	0.000919027	0.000386385	0.00057087	0.000315219	0.00041868	0.280704	0.189487	0.0223422	0.026544	0.0522825	0.0941128	1511141	93.02	4.65
PS52_06_1_bin.39	dBacteria	pBacteroidota	cBacteroidia	oBacteroidales	fProlixibacteraceae	UBA6024	0.00131216	0.00101252	8.78152e-05	0.000254591	0.000212089	0.000285392	0.589725	0.345896	0.233113	0.392693	0.15645	0.207648	2641834	53.1069	1.63082
PS52_06_1_bin.4	dBacteria	pPseudomonadota	cGammaproteobacteria	oBurkholderiales	fBurkholderiaceae	Giesbergeria	0.0312228	0.0308725	0.00470742	0.00462509	0.00397395	0.00356406	0.286579	0.501967	0.506535	0.361427	0.173547	0.205455	2154971	57.6432	2.17532
PS52_06_1_bin.42	dBacteria	pPseudomonadota	cGammaproteobacteria	oBurkholderiales	fBurkholderiaceae	Aquabacterium	0.187055	0.198498	0.37294	0.333903	0.113593	0.106082	0.0585468	0.0405984	0.0209302	0.0268603	0.145901	0.119369	4662695	62.8341	4.36972
PS52_06_1_bin.43	dBacteria	pPseudomonadota	cAlphaproteobacteria	oRhodobacterales	fRhodobacteraceae	Tabrizicola	0.0117321	0.00779123	0.0022804	0.00194266	0.00434919	0.00375509	0.0687352	0.0661222	0.0389529	0.0441258	0.0249787	0.0256166	2992068	68.1189	1.85606
PS52_06_1_bin.46	dBacteria	pPseudomonadota	cGammaproteobacteria	oBurkholderiales	fNitrosomonadaceae	Nitrosomonas	0.0344092	0.0489343	0.00182125	0.00329717	0.00381297	0.00600991	0.105664	0.0555923	0.0725337	0.0495142	0.038159	0.0332425	1634734	76.9154	4.00762
PS52_06_1_bin.5	dBacteria	pPseudomonadota	cGammaproteobacteria	oBurkholderiales	fBurkholderiaceae	Rhodoferax	0.110102	0.0936613	0.0229471	0.0254913	0.0109157	0.00915439	0.552716	0.767481	0.637866	0.533887	0.276422	0.290622	3971338	70.7496	4.71573
PS52_06_1_bin.50	dBacteria	pPseudomonadota	cGammaproteobacteria	oBurkholderiales	fRhodocyclaceae	Azonexus	0.221243	0.225521	0.0183741	0.0191853	0.021087	0.0189819	0.234995	0.251682	0.206012	0.13836	0.135544	0.0988674	2552671	58.8883	9.18794
PS52_06_1_bin.52	dBacteria	pBacteroidota	cBacteroidia	oBacteroidales	fJAIFNC01	JAIFNC01	0.000175139	0.00016968	5.259e-05	0.000113122	9.62943e-05	0.000135148	0.164027	0.099363	0.0691811	0.0711155	0.040428	0.0550137	4901037	94.7672	3.37566
PS52_06_1_bin.55	dBacteria	pFibrobacterota	cFibrobacteria	oUBA5070	fUBA5070	UBA5070	0.00201876	0.00278506	0.000726848	0.000330611	0.000419093	0.000411747	0.0913951	0.0761734	0.0667533	0.106705	0.0347719	0.0423314	4079963	90.4654	1.1988
PS52_06_1_bin.56	dBacteria	pPatescibacteria	JAEDAM01	oBD1-5	pPatescibacteria	UBA1545	0.00710192	0.00653277	0.00333978	0.00458978	0.00204407	0.00235185	0.366484	0.312569	0.0510249	0.0621027	0.0818142	0.131023	1230831	95.35	2.33
PS52_06_1_bin.59	dBacteria	pNitrospirota	c9FT-COMBO-42-15	o9FT-COMBO-42-15	f9FT-COMBO-42-15	9FT-COMBO-42-15	0.000220466	0.000283265	7.78431e-05	8.54368e-05	0.000394592	0.000371708	0.152652	0.0865446	0.226953	0.283547	0.0750966	0.103092	2497184	88.8333	5
PS52_06_1_bin.6	dBacteria	pPseudomonadota	cGammaproteobacteria	oBurkholderiales	fBurkholderiaceae	Undibacterium	0.00545758	0.00713033	0.000265493	0.000461132	0.000293477	0.000321762	0.140933	0.165105	0.0286477	0.0276774	0.0376293	0.0588472	4207034	63.3856	1.72414
PS52_06_1_bin.60	dBacteria	pPseudomonadota	cGammaproteobacteria	oBurkholderiales	fBurkholderiaceae	Undibacterium	0.129947	0.0829113	0.00779262	0.0114678	0.00522725	0.00576493	1.58521	2.54947	1.01199	0.955541	0.634533	0.833522	3870609	94.5115	0.866232
PS52_06_1_bin.62	dBacteria	pAcidobacteriota	cHolophagae	oHolophagales	fHolophagaceae	Holophaga	0.000385675	0.000404533	0.000267794	0.000334484	0.000454398	0.000484485	0.359226	0.354616	0.0193614	0.0201864	0.0755722	0.140879	3937078	94.7368	0
PS52_06_1_bin.64	dBacteria	pPseudomonadota	cGammaproteobacteria	oBurkholderiales	fBurkholderiaceae	Undibacterium	0.062982	0.0763671	0.0018694	0.00408002	0.00105832	0.00116658	0.610524	0.641757	0.0765595	0.0925708	0.156893	0.23721	4444624	99.3426	0.704326
PS52_06_1_bin.69	dBacteria	pPseudomonadota	cGammaproteobacteria	oAcidiferrobacterales	fUBA6901	UBA6901	0.0244718	0.0436357	0.00790443	0.0110419	0.0130776	0.0182993	0.47882	0.1771	0.671762	0.70932	0.215543	0.274524	2014536	60.6538	8.87534
PS52_06_1_bin.7	dBacteria	pPseudomonadota	cGammaproteobacteria	oBurkholderiales	fRhodocyclaceae	Azonexus	0.0587411	0.0443307	0.00336848	0.00420065	0.00231961	0.0021721	0.310218	0.20911	0.109399	0.139115	0.0882974	0.0993849	2549103	63.5715	1.21271
PS52_06_1_bin.72	dBacteria	pPseudomonadota	cGammaproteobacteria	oBurkholderiales	fBurkholderiaceae	Herbaspirillum	0.00399256	0.00532543	0.056027	0.0616327	0.144568	0.215015	0.0798065	0.00938356	0.0075253	0.0258676	0.0609144	0.0664761	3127369	58.8401	1.72414
PS52_06_1_bin.74	dBacteria	pDesulfobacterota	cDesulfuromonadia	oGeobacterales	fGeobacteraceaeA	VEOV01	0.000276857	0.0002892	0.000103521	0.000100294	0.00024525	0.000298972	0.181307	0.194703	0.221234	0.127888	0.0726446	0.0912739	1842800	61.4081	5.80645
PS52_06_1_bin.76	dBacteria	pPseudomonadota	cGammaproteobacteria	oBurkholderiales	fBurkholderiaceae	Rhodoferax	1.89588	1.82094	0.187639	0.239809	0.0355797	0.0369226	0.0993932	0.134808	0.113424	0.0727462	0.463714	0.700101	2594420	52.306	0.876168
PS52_06_1_bin.81	dBacteria	pPseudomonadota	cGammaproteobacteria	oBurkholderiales	fBurkholderiaceae	LMDS01	0.0325539	0.0429282	0.255618	0.1945	0.14739	0.134835	0.0824065	0.0602292	0.0449921	0.0448465	0.10403	0.0722559	2668852	52.5962	3.0876
PS52_06_1_bin.83	dBacteria	pPseudomonadota	cGammaproteobacteria	oBurkholderiales	fRhodocyclaceae	Azonexus	0.155902	0.133836	0.00969004	0.00981479	0.00746836	0.0068172	0.619634	0.446712	0.168707	0.194845	0.175343	0.19621	2312613	52.3141	1.32965
PS52_06_1_bin.84	dBacteria	pPatescibacteria	cSaccharimonadia	oSaccharimonadales	fJACPYF01	JACPYF01	0.000326719	0.000483211	6.53301e-05	0.000158361	0.000176889	0.000261553	0.118561	0.102517	0.179891	0.180794	0.058317	0.074564	493008	60.47	0
PS52_06_1_bin.85	dBacteria	pPatescibacteria	cPaceibacteria	oUBA9983A	fUBA9973	UBA9973	0.00056693	0.00058306	0.000159137	0.000246488	0.000332714	0.000682786	0.105315	0.0531448	0.150355	0.138969	0.0450355	0.0596271	545339	76.74	0
PS52_06_1_bin.9	dBacteria	pPseudomonadota	cAlphaproteobacteria	oCaulobacterales	fCaulobacteraceae	Caulobacter	0.0226891	0.0227251	0.00546226	0.00506699	0.0060189	0.00507276	0.0925984	0.126599	0.190945	0.0885367	0.0565714	0.0616814	2998345	70.0732	2.04082
PS52_06_2_bin.10	dBacteria	pDesulfobacterota	cDesulfuromonadia	oGeobacterales	fGeobacteraceaeA	VEOV01	0.000344671	0.000330897	0.000111103	0.000138172	0.000283484	0.00024302	0.142995	0.21405	0.218845	0.125303	0.0702644	0.0897152	1394407	53.5088	0
PS52_06_2_bin.15	dBacteria	pPseudomonadota	cGammaproteobacteria	oBurkholderiales	fBurkholderiaceae	Rhodoferax	0.0539436	0.0432471	0.00454365	0.00441129	0.00322788	0.00263844	0.394477	0.310702	0.0155276	0.0173155	0.0850035	0.136114	2958973	73.2775	0.560748
PS52_06_2_bin.17	dBacteria	pPatescibacteria	cPaceibacteria	oUBA9983A	fGWA1-40-21	GWA1-40-21	0.00777978	0.00695087	0.00144573	0.00207184	0.00255937	0.00405026	1.37167	1.26738	2.35071	2.12843	0.714304	0.918781	1114833	97.67	4.65
PS52_06_2_bin.2	dBacteria	pPseudomonadota	cGammaproteobacteria	oPseudomonadales	fPseudomonadaceae	Pseudomonas	0.493146	0.400268	0.139067	0.150618	0.190831	0.273752	0.12714	0.0778369	0.0459556	0.0618814	0.19605	0.141633	3679449	63.7951	4.7354
PS52_06_2_bin.20	dBacteria	pPlanctomycetota	cBrocadiia	oBrocadiales	fBrocadiaceae	JACVXV01	0.000923353	0.00116672	0.000155729	0.000265526	0.000393588	0.000517581	0.0652044	0.085453	0.323559	0.257858	0.0735497	0.113421	2273331	73.429	4.46571
PS52_06_2_bin.22	dBacteria	pPseudomonadota	cGammaproteobacteria	oBurkholderiales	fBurkholderiaceae	Ideonella	0.115963	0.114453	0.837853	0.661884	0.515237	0.466651	0.136907	0.180351	0.118458	0.104543	0.32523	0.258525	3613607	78.0281	2.00279
PS52_06_2_bin.23	dBacteria	pDesulfobacterota	cDesulfuromonadia	oGeobacterales	fGeobacteraceaeA	VEOV01	0.000660212	0.000687603	0.000204213	0.000254987	0.000528593	0.000548862	1.34405	1.25676	1.196	0.968828	0.476853	0.590008	4339545	98.0645	0.967742
PS52_06_2_bin.24	dBacteria	pPseudomonadota	cGammaproteobacteria	oBurkholderiales	fBurkholderiaceae	Rhodoferax	0.0678671	0.0632274	0.010968	0.0104534	0.00704882	0.00558903	0.382995	0.512443	0.430759	0.427337	0.191869	0.204507	5802441	79.6388	8.15087
PS52_06_2_bin.29	dBacteria	pNitrospirota	c9FT-COMBO-42-15	o9FT-COMBO-42-15	f9FT-COMBO-42-15	9FT-COMBO-42-15	8.01801e-05	0.00011911	2.22727e-05	6.59328e-05	0.000204544	0.000249139	0.0991914	0.0953782	0.202713	0.218298	0.0616153	0.0834849	1202713	60.178	1.09091
PS52_06_2_bin.30	dBacteria	pDesulfobacterota	cDesulfuromonadia	oGeobacterales	fPseudopelobacteraceae	JACRCG01	0.00106559	0.00175376	0.000338933	0.000487008	0.00113343	0.00104287	0.920044	1.0167	0.498493	0.373931	0.281499	0.384196	4066829	50.8772	9.64912
PS52_06_2_bin.33	dBacteria	pPseudomonadota	cGammaproteobacteria	oBurkholderiales	fBurkholderiaceae	Rubrivivax	0.237376	0.230704	0.692685	0.442751	1.10925	0.916631	0.101525	0.0875588	0.0299431	0.0500799	0.38985	0.368457	3479382	62.494	0.482866
PS52_06_2_bin.34	dBacteria	pPseudomonadota	cGammaproteobacteria	oBurkholderiales	fRhodocyclaceae	Azonexus	0.068951	0.0510021	0.00363393	0.00469517	0.0025901	0.0023478	0.273916	0.223691	0.105694	0.133617	0.0870139	0.0926182	2634050	69.7426	1.88807
PS52_06_2_bin.35	dBacteria	pPseudomonadota	cGammaproteobacteria	oBurkholderiales	fBurkholderiaceae	UBA2334	0.029081	0.0351753	0.00305994	0.00295859	0.00265261	0.00217396	0.105833	0.174591	0.0656677	0.0543049	0.0475498	0.0533357	3113437	64.8065	1.75234
PS52_06_2_bin.36	dBacteria	pDesulfobacterota	cDesulfuromonadia	oGeobacterales	fPseudopelobacteraceae	JACRCG01	0.000535497	0.000730355	0.000217831	0.000287041	0.000607456	0.000608561	1.82493	2.09558	1.1854	0.982252	0.609115	0.79885	3034214	95.8664	0.645161
PS52_06_2_bin.38	dBacteria	pPseudomonadota	cGammaproteobacteria	oBurkholderiales	fBurkholderiaceae	Aquabacterium	0.657447	0.693868	0.0259526	0.0332773	0.0171717	0.0174272	0.23326	0.333072	0.382509	0.370086	0.276407	0.245088	2198838	62.3946	0.965732
PS52_06_2_bin.39	dBacteria	pPseudomonadota	cAlphaproteobacteria	oRhodobacterales	fRhodobacteraceae	Tabrizicola	0.0117165	0.0079606	0.0017182	0.00151058	0.00404852	0.00344878	0.0572946	0.0795708	0.0396843	0.0444618	0.0251415	0.0266066	3237280	81.0643	2.01632
PS52_06_2_bin.4	dBacteria	pPseudomonadota	cAlphaproteobacteria	oSphingomonadales	fSphingomonadaceae	Novosphingobium	0.0631356	0.100347	0.324213	0.251367	0.113288	0.0946917	0.0492472	0.0979405	0.0497709	0.0424909	0.118649	0.0892635	2468288	67.1179	4.12725
PS52_06_2_bin.40	dBacteria	pPseudomonadota	cGammaproteobacteria	oBurkholderiales	fBurkholderiaceae	Undibacterium	0.00404212	0.00585737	0.000202763	0.000368729	0.000253823	0.000261401	0.115537	0.172051	0.0271192	0.0259994	0.0351693	0.0566073	4137240	89.7282	1.70983
PS52_06_2_bin.48	dBacteria	pPseudomonadota	cGammaproteobacteria	oBurkholderiales	fBurkholderiaceae	Rhodoferax	0.0119775	0.0111889	0.00289499	0.00284178	0.00273257	0.00247488	1.01065	1.52799	0.70137	0.82347	0.409759	0.533617	3828957	95.1519	1.26168
PS52_06_2_bin.49	dBacteria	pPseudomonadota	cGammaproteobacteria	oBurkholderiales	fBurkholderiaceae	Rhodoferax	0.122269	0.102035	0.0145214	0.0127418	0.0103129	0.00832306	0.728455	1.12079	1.57858	1.00396	0.470199	0.55693	3901984	76.0602	3.6215
PS52_06_2_bin.5	dBacteria	pPseudomonadota	cGammaproteobacteria	oBurkholderiales	fBurkholderiaceae	Rhodoferax	0.118768	0.100736	0.00788858	0.00764369	0.00838256	0.00759553	0.36794	0.658567	0.190699	0.162699	0.163092	0.197596	3826191	91.5359	2.24883
PS52_06_2_bin.52	dBacteria	pBacteroidota	cBacteroidia	oBacteroidales	fJAIFNC01	JAIFNC01	0.000115282	9.453e-05	5.42868e-05	0.000123135	8.0018e-05	0.000118087	0.107075	0.0934283	0.0515675	0.0529411	0.0305368	0.0403942	3004211	63.7593	2.53968
PS52_06_2_bin.57	dBacteria	pPseudomonadota	cGammaproteobacteria	oBurkholderiales	fRhodocyclaceae	NA	0.0531929	0.0957177	0.00981912	0.0372379	0.00580203	0.00549553	0.580376	1.41514	1.75678	0.94494	0.49045	0.626639	3942703	99.2101	0.473934
PS52_06_2_bin.59	dBacteria	pFibrobacterota	cFibrobacteria	oUBA5070	fUBA5070	UBA5070	0.00185989	0.00261586	0.000686479	0.000273798	0.000438047	0.000418301	0.086429	0.086887	0.0670577	0.108554	0.035522	0.0432355	4209307	82.3177	3.2967
PS52_06_2_bin.61	dBacteria	pPseudomonadota	cGammaproteobacteria	oBurkholderiales	fRhodocyclaceae	Azonexus	0.194467	0.187186	0.0135541	0.0124996	0.0129547	0.00983745	0.231338	0.313548	0.208454	0.138129	0.132197	0.106331	2596479	58.3639	1.54028
PS52_06_2_bin.63	dBacteria	pDesulfobacterota	cDesulfuromonadia	oGeobacterales	fGeobacteraceaeA	VEOV01	0.000233736	0.000273471	7.15957e-05	9.30717e-05	0.000183507	0.000219355	0.137301	0.173983	0.244532	0.153352	0.0710078	0.0905484	2487269	56.7168	4.19355
PS52_06_2_bin.65	dBacteria	pPlanctomycetota	cBrocadiia	oBrocadiales	fBrocadiaceae	XYD2-FULL-41-16	0.011504	0.0194552	0.00210231	0.00329234	0.00437033	0.006417	0.213143	0.189532	0.593316	0.545526	0.158866	0.218901	1273007	51.2277	4.11941
PS52_06_2_bin.7	dBacteria	pBacteroidota	cBacteroidia	oBacteroidales	fProlixibacteraceae	UBA6024	0.00156668	0.00122933	0.000116031	0.000254977	0.000313549	0.000428901	0.631524	0.445623	0.271743	0.458891	0.181169	0.235289	3192949	62.3656	4.83871
PS52_06_2_bin.9	dBacteria	pPseudomonadota	cGammaproteobacteria	oBurkholderiales	fBurkholderiaceae	Rugamonas	0.0772725	0.072142	0.0162777	0.017368	0.0174943	0.0186308	0.264259	0.377839	0.114932	0.108403	0.108462	0.115027	5110724	92.7593	1.86255
PS52_18_1_bin.1	dBacteria	pChloroflexota	cAnaerolineae	oAnaerolineales	fVGOW01	VGOW01	0.0225601	0.027123	0.0112683	0.0171648	0.0236569	0.0228111	0.0585393	0.0372693	0.228414	0.184995	0.0633802	0.0733401	2252159	50.4477	6.43802
PS52_18_1_bin.11	dBacteria	pDesulfobacterota	cDesulfobacteria	oDesulfobacterales	fDesulfatibacillaceae	JACRLG01	0.000123695	0.000171557	6.94093e-05	9.31252e-05	0.000193185	0.000181067	0.00256977	0.00463237	0.13374	0.166531	0.0308142	0.060118	2981383	71.448	0.865335
PS52_18_1_bin.12	dBacteria	pPseudomonadota	cGammaproteobacteria	oAcidiferrobacterales	fUBA6901	UBA6901	0.0215564	0.0377236	0.00739646	0.00983678	0.0116252	0.0163262	0.458514	0.167348	0.653926	0.678747	0.2063	0.265217	1634641	53.0721	6.89655
PS52_18_1_bin.16	dBacteria	pPseudomonadota	cGammaproteobacteria	oBurkholderiales	fBurkholderiaceae	Aquabacterium	0.67458	0.711252	0.02685	0.034594	0.0171111	0.017412	0.285865	0.389252	0.662867	0.636639	0.345642	0.290982	3066155	90.037	0.683411
PS52_18_1_bin.18	dBacteria	pBacteroidota	cBacteroidia	oBacteroidales	fProlixibacteraceae	UBA6024	0.00153945	0.00109589	0.000175975	0.000272973	0.000264024	0.000426228	0.643604	0.400603	0.357315	0.472949	0.187825	0.239434	3344788	68.7634	2.15054
PS52_18_1_bin.2	dBacteria	pPseudomonadota	cGammaproteobacteria	oBurkholderiales	fRhodocyclaceae	Azonexus	0.209736	0.204379	0.0148112	0.0143228	0.0141401	0.0105333	0.246927	0.301718	0.257438	0.146009	0.142002	0.111558	2604506	64.4025	1.39547
PS52_18_1_bin.20	dBacteria	pPseudomonadota	cGammaproteobacteria	oAcidiferrobacterales	fSulfurifustaceae	CAKKRZ01	0.0178012	0.0298498	0.00608792	0.0118545	0.0118787	0.0131738	0.156676	0.0961896	0.349981	0.344302	0.103779	0.129934	1654641	52.1003	7.46951
PS52_18_1_bin.23	dBacteria	pDesulfobacterota	cDesulfobacteria	oDesulfobacterales	fDesulfolunaceae	DYJE01	0.00133639	0.00172524	0.00029908	0.000720917	0.000496154	0.000537497	0.0400076	0.081005	2.68263	3.26375	0.60725	1.19034	5806174	96.0215	1.6129
PS52_18_1_bin.26	dBacteria	pPseudomonadota	cGammaproteobacteria	oXanthomonadales	fXanthomonadaceae	Thermomonas	0.0180636	0.0212485	0.00466761	0.00417894	0.0131723	0.010922	0.0636705	0.0985502	0.243242	0.147785	0.06255	0.0753377	2059633	82.0907	3.99425
PS52_18_1_bin.27	dBacteria	pPseudomonadota	cGammaproteobacteria	oBurkholderiales	fBurkholderiaceae	Rhodoferax	0.189006	0.16677	0.0505899	0.0549763	0.0155983	0.0125472	0.158034	0.205176	0.358377	0.273822	0.14849	0.109321	3447583	68.6391	6.981
PS52_18_1_bin.28	dBacteria	pFibrobacterota	cFibrobacteria	oUBA5070	fUBA5070	UBA5070	0.00140993	0.00219519	0.000493057	0.000121115	0.000275352	0.000223223	0.0726866	0.0649826	0.0758432	0.0929264	0.0311157	0.037708	2267416	50.1342	0
PS52_18_1_bin.29	dBacteria	pNitrospirota	cUBA9217	oUBA9217	fUBA9217	GWC2-56-14	0.000523883	0.000667657	0.000318078	0.000404206	0.000996728	0.000898238	0.00898785	0.0136202	0.36879	0.436934	0.083214	0.160605	3032693	89.4949	0.909091
PS52_18_1_bin.3	dBacteria	pPseudomonadota	cGammaproteobacteria	oPseudomonadales	fOleiphilaceae	NA	0.0973487	0.0735887	0.0124622	0.0169066	0.00267825	0.00276969	0.430309	0.558089	1.78691	2.37744	0.53585	0.805351	3741863	97.5762	0.251437
PS52_18_1_bin.30	dBacteria	pDesulfobacterota	cGWC2-55-46	oGWC2-55-46	fGWC2-55-46	GWB2-55-19	0.000430039	0.000506235	0.00020297	0.000187474	0.000558404	0.000490721	0.0560196	0.074145	0.535584	0.323661	0.0991785	0.173747	2421305	91.2903	1.29032
PS52_18_1_bin.33	dBacteria	pPseudomonadota	cGammaproteobacteria	oBurkholderiales	fBurkholderiaceae	Piscinibacter	0.0848139	0.0797936	0.106516	0.108711	0.130512	0.176649	0.0437319	0.0584314	0.433045	0.212669	0.143487	0.10824	3798018	84.2392	2.76869
PS52_18_1_bin.34	dBacteria	pNitrospirota	cNitrospiria	oNitrospirales	fNitrospiraceae	Nitrospira	0.378049	0.49961	0.0454112	0.0534911	0.0777236	0.0864548	0.120357	0.110363	0.335237	0.188111	0.189481	0.150458	2529839	68.25	1.79924
PS52_18_1_bin.35	dBacteria	pPatescibacteria	JAEDAM01	oBD1-5	pPatescibacteria	CAIVSN01	0.00769584	0.00619328	0.000749096	0.00092639	0.000381005	0.000453398	1.18171	1.5805	0.511495	0.482224	0.377233	0.544576	1237592	95.35	4.65
PS52_18_1_bin.37	dBacteria	pPatescibacteria	cABY1	oBM507	fUBA12075	UBA12075	0.000647483	0.00090574	0.000261027	0.000395923	0.000823963	0.00101603	0.0160703	0.0164347	0.156426	0.213885	0.0406865	0.073616	1026263	86.05	11.63
PS52_18_1_bin.38	dBacteria	pPseudomonadota	cGammaproteobacteria	oBurkholderiales	fBurkholderiaceae	Rhodoferax	1.79512	1.73851	0.163136	0.210759	0.0280038	0.0296962	0.0695564	0.137878	0.166574	0.0787984	0.441803	0.665092	3193264	77.6815	0.704829
PS52_18_1_bin.42	dBacteria	pPseudomonadota	cGammaproteobacteria	oPseudomonadales	fPseudomonadaceae	Pseudomonas	0.508799	0.416313	0.142111	0.154945	0.198398	0.283996	0.126814	0.0467614	0.0793544	0.0625089	0.202	0.147257	3172616	56.4071	1.81048
PS52_18_1_bin.44	dBacteria	pChloroflexota	cAnaerolineae	oAnaerolineales	fEnvOPS12	OLB14	0.00548931	0.00587594	0.00258567	0.00397327	0.00690836	0.00741949	0.0515708	0.0379712	0.204498	0.227831	0.0554122	0.082044	2385666	54.5464	8.573
PS52_18_1_bin.45	dBacteria	pPseudomonadota	cGammaproteobacteria	oBurkholderiales	fRhodocyclaceae	Azonexus	0.064879	0.0485813	0.00364903	0.00465388	0.00247285	0.00219587	0.273019	0.199478	0.139207	0.142013	0.0880149	0.0911188	3158737	80.7967	4.70294
PS52_18_1_bin.46	dBacteria	pDesulfobacterota	cDesulfobacteria	oDesulfobacterales	fJAHIVH01	JAHIVH01	0.000157085	0.000232867	5.38792e-05	0.000119659	0.000105735	0.00011558	0.0146839	0.0143721	0.147812	0.215413	0.0393012	0.0729542	3440163	59.8214	0
PS52_18_1_bin.47	dBacteria	pPseudomonadota	cGammaproteobacteria	oBurkholderiales	fSCOH01	NA	0.132734	0.12118	0.0050728	0.00698211	0.00244871	0.00242679	2.18539	2.24095	1.35253	1.98388	0.80336	0.956109	4095630	99.5726	1.28205
PS52_18_1_bin.48	dBacteria	pPatescibacteria	cSaccharimonadia	oSaccharimonadales	pPatescibacteria	2011-GWC2-44-17	0.362859	0.418839	9.03623	10.747	5.35121	5.72763	2.80698	2.12281	1.96325	2.2262	4.0763	3.3754	1301573	100	20.93
PS52_18_1_bin.51	dBacteria	pPseudomonadota	cGammaproteobacteria	oBurkholderiales	fBurkholderiaceae	Rhodoferax	0.0115532	0.0105215	0.00373254	0.00345286	0.00621406	0.0063477	0.173921	0.281248	0.237626	0.168352	0.0902968	0.106288	4105567	72.5982	0.529595
PS52_18_1_bin.53	dBacteria	pPlanctomycetota	cBrocadiia	oBrocadiales	fBrocadiaceae	JACVXV01	0.00384731	0.00410172	0.000926135	0.00131704	0.00186792	0.00227705	0.0966084	0.0863807	0.431144	0.372653	0.100112	0.15536	3517784	86.8132	3.66986
PS52_18_1_bin.54	dBacteria	pPseudomonadota	cGammaproteobacteria	oBurkholderiales	fNitrosomonadaceae	Nitrosomonas	0.044729	0.0601823	0.0025436	0.00507772	0.00526032	0.00715853	0.0630658	0.0635903	0.158112	0.0665807	0.0476301	0.0452781	1364629	65.8709	1.21309
PS52_18_1_bin.55	dBacteria	pPseudomonadota	cGammaproteobacteria	oBurkholderiales	fBurkholderiaceae	Giesbergeria	0.0207718	0.01871	0.00470139	0.00420892	0.00462287	0.0040229	0.213868	0.451734	0.483509	0.322019	0.152817	0.188311	3652072	66.9881	7.79439
PS52_18_1_bin.60	dBacteria	pPseudomonadota	cGammaproteobacteria	oBurkholderiales	fBurkholderiaceae	Rhodoferax	0.0701325	0.0884862	0.00535159	0.00542558	0.00951863	0.0089846	4.12191	5.47306	2.21063	1.59192	1.35854	1.89532	3951470	97.2196	0.772975
PS52_18_1_bin.62	dBacteria	pPlanctomycetota	cBrocadiia	oBrocadiales	fScalinduaceae	Scalindua	0.00127804	0.0023206	0.000297287	0.000439966	0.00106803	0.00112444	0.0892792	0.0558262	0.212544	0.167753	0.0531931	0.074912	1172048	54.2477	0
PS52_18_1_bin.63	dBacteria	pPseudomonadota	cGammaproteobacteria	oBurkholderiales	fBurkholderiaceae	Ideonella	0.112338	0.108946	0.800181	0.630471	0.534678	0.482997	0.134623	0.141019	0.152206	0.10227	0.319973	0.250848	3885453	78.6387	1.88919
PS52_18_1_bin.65	dBacteria	pNitrospirota	cRBG-16-64-22	oRBG-16-64-22	fRBG-16-64-22	RBG-16-64-22	0.00118121	0.00136565	0.000544941	0.000575489	0.00143612	0.00138331	0.0721201	0.0496911	0.209331	0.125742	0.0463371	0.0677035	2698047	91.4899	0.454545
PS52_18_1_bin.66	dBacteria	pPseudomonadota	cGammaproteobacteria	oBurkholderiales	fBurkholderiaceae	Giesbergeria	0.0414118	0.0373295	0.00655193	0.0062363	0.00540975	0.00471171	0.332265	0.650759	0.873775	0.585278	0.254373	0.315612	2413759	65.0991	1.65841
PS52_18_1_bin.69	dBacteria	pPseudomonadota	cGammaproteobacteria	oBurkholderiales	fBurkholderiaceae	Undibacterium	0.0481979	0.0583259	0.00149581	0.00333728	0.000848232	0.00082541	0.453786	0.473961	0.0798108	0.0722332	0.119282	0.174816	3099080	64.8993	0.734498
PS52_18_1_bin.7	dBacteria	pPatescibacteria	cPaceibacteria	oUBA9983A	fUBA9973	UBA9973	0.000755307	0.000495061	0.000138551	0.000227247	0.000757171	0.0020726	0.0966335	0.058386	0.170085	0.146461	0.0476012	0.0636191	545228	81.4	0
PS52_18_1_bin.70	dBacteria	pAcidobacteriota	cHolophagae	oHolophagales	fHolophagaceae	JADJVL01	0.00180238	0.00258416	0.000528057	0.000630424	0.00175495	0.00166675	0.0479347	0.0330825	0.213034	0.158749	0.0461767	0.0725745	1853402	52.913	3.50877
PS52_18_1_bin.71	dBacteria	pPatescibacteria	cABY1	oBM507	fUBA12075	JAHILH01	0.0001257	0.000176395	0.000142171	0.000212251	0.000125902	0.000132024	0.000387631	0.00545786	0.276985	0.224023	0.0507768	0.100576	1151871	53.49	0
PS52_18_1_bin.72	dBacteria	pNitrospirota	cUBA9217	oJACRHJ01	fJACRHJ01	NA	0.000256131	0.000349435	0.000146019	0.000189473	0.000424624	0.000607107	0.0339134	0.0311856	0.257233	0.169661	0.0493966	0.0852507	1488790	57.1439	1.81818
PS52_18_1_bin.74	dBacteria	pPseudomonadota	cAlphaproteobacteria	oRhizobiales	fXanthobacteraceae	Bradyrhizobium	0.0860278	0.101639	0.0602588	0.0522896	0.0525962	0.0490709	0.0684597	0.097957	0.352835	0.244053	0.116519	0.0958341	3047366	52.8628	2.51027
PS52_18_1_bin.9	dBacteria	pActinomycetota	cActinomycetia	oMycobacteriales	fMycobacteriaceae	Rhodococcus	0.122278	0.204895	4.90681	4.48938	3.50673	3.03558	3.07237	1.49898	1.69727	2.18448	2.47188	1.5504	6166016	98.4962	1.85195
PS52_18_2_bin.1	dBacteria	pNitrospirota	cThermodesulfovibrionia	oThermodesulfovibrionales	fUBA6898	UBA6898	0.000310793	0.000413149	8.53564e-05	0.000121387	0.000281068	0.000342888	0.0951667	0.0678305	1.30715	0.956796	0.242841	0.452548	3303672	93.0934	5.9596
PS52_18_2_bin.10	dBacteria	pPseudomonadota	cGammaproteobacteria	oBurkholderiales	fBurkholderiaceae	Rhodoferax	0.0538	0.0499867	0.00819648	0.00785649	0.00556999	0.00457099	0.327321	0.431718	0.370156	0.381719	0.164089	0.176795	3626715	52.0624	0.891745
PS52_18_2_bin.16	dBacteria	pNitrospirota	c9FT-COMBO-42-15	o9FT-COMBO-42-15	f9FT-COMBO-42-15	9FT-COMBO-42-15	0.000143866	0.000178625	4.07751e-05	6.17011e-05	0.000282534	0.00033553	0.143854	0.0917606	0.238453	0.316243	0.0791251	0.111067	2700960	87.4697	6.13636
PS52_18_2_bin.18	dBacteria	pPseudomonadota	cGammaproteobacteria	oBurkholderiales	fBurkholderiaceae	Undibacterium	0.0507963	0.0618562	0.00160924	0.0033903	0.000890784	0.000911161	0.49804	0.519066	0.0818592	0.106381	0.13248	0.191417	3804242	80.2919	2.29462
PS52_18_2_bin.19	dBacteria	pPseudomonadota	cGammaproteobacteria	oNevskiales	fNevskiaceae	JACPFV01	0.0136165	0.0195917	0.00451403	0.0050297	0.00411912	0.00407977	0.105195	0.105844	0.499097	0.41083	0.117192	0.1742	1673359	72.8159	1.69082
PS52_18_2_bin.2	dBacteria	pDesulfobacterota	cDesulfobacteria	oDesulfobacterales	fDesulfolunaceae	DYJE01	0.00399603	0.00324251	0.000842924	0.00130713	0.000870718	0.00107278	0.0162159	0.0310591	1.25821	2.05577	0.337258	0.683601	5290136	79.339	0.803891
PS52_18_2_bin.21	dBacteria	pPseudomonadota	cGammaproteobacteria	oBurkholderiales	fRhodocyclaceae	Sulfuritalea	0.0437338	0.0395552	0.0415195	0.0399729	0.0515072	0.0466312	0.107583	0.182923	1.51952	1.05845	0.313139	0.500534	3109055	86.3511	2.28671
PS52_18_2_bin.24	dBacteria	pPseudomonadota	cAlphaproteobacteria	oCaulobacterales	fCaulobacteraceae	Phenylobacterium	0.0258715	0.027459	0.00654613	0.00710831	0.0077697	0.00677229	0.0561887	0.111875	0.534613	0.394381	0.117858	0.178812	2744037	85.3086	4.329
PS52_18_2_bin.25	dBacteria	pPseudomonadota	cGammaproteobacteria	oBurkholderiales	fRhodocyclaceae	CAJBIL01	0.287764	0.19621	0.0100793	0.0112197	0.0101681	0.00816987	0.618502	0.813143	0.685851	0.508741	0.314985	0.300417	3539309	89.0751	0.561286
PS52_18_2_bin.26	dBacteria	pFibrobacterota	cFibrobacteria	oUBA5070	fUBA5070	UBA5070	0.00190241	0.00251076	0.000577371	0.000192521	0.000330091	0.000324814	0.0853922	0.0751972	0.0662138	0.119125	0.0351767	0.04377	4215430	80.2296	0.0999001
PS52_18_2_bin.28	dBacteria	pDesulfobacterota	cDesulfobacteria	oDesulfobacterales	fDesulfatibacillaceae	JACRLG01	0.000217717	0.000252935	0.000102613	0.00020592	0.000227347	0.000191478	0.00333915	0.00583155	0.138722	0.224714	0.0373804	0.0747077	3953963	91.8049	1.6129
PS52_18_2_bin.29	dBacteria	pBacteroidota	cBacteroidia	oBacteroidales	fProlixibacteraceae	UBA6024	0.00123004	0.000806329	6.93697e-05	0.000220118	0.000146546	0.000236704	0.553229	0.353622	0.243726	0.483652	0.163687	0.213653	2526535	56.5347	1.64875
PS52_18_2_bin.3	dBacteria	pPatescibacteria	cABY1	oBM507	fUBA12075	UBA12075	0.000911547	0.0010646	0.000676039	0.000859953	0.000752618	0.00081353	0.0145764	0.0162795	0.150809	0.266953	0.0453696	0.085968	1149706	95.35	2.33
PS52_18_2_bin.30	dBacteria	pBacteroidota	cBacteroidia	oChitinophagales	fChitinophagaceae	Ferruginibacter	0.0229771	0.0216781	0.00733897	0.0154363	0.0712314	0.154548	0.095151	0.055498	0.157445	0.232058	0.0833362	0.0718147	3553184	97.0443	1.23153
PS52_18_2_bin.36	dBacteria	pChloroflexota	cAnaerolineae	oAnaerolineales	fVGOW01	VGOW01	0.0224238	0.0274553	0.0114186	0.0170799	0.0229145	0.0232127	0.0579732	0.0361995	0.163958	0.237882	0.0620518	0.072374	2072003	58.6295	1.29293
PS52_18_2_bin.4	dBacteria	pPseudomonadota	cGammaproteobacteria	oBurkholderiales	fBurkholderiaceae	Giesbergeria	0.0478953	0.0444861	0.00972349	0.00965521	0.00985519	0.00908036	0.322408	0.627872	0.798403	0.563137	0.244252	0.293393	2501572	65.4088	1.16372
PS52_18_2_bin.41	dBacteria	pPseudomonadota	cGammaproteobacteria	oBurkholderiales	fRhodocyclaceae	Azonexus	0.0661252	0.0495717	0.00363334	0.00438652	0.00246541	0.00217314	0.278451	0.204965	0.115575	0.170019	0.0897365	0.0938916	3198033	82.1435	3.4718
PS52_18_2_bin.44	dBacteria	pPseudomonadota	cGammaproteobacteria	oPseudomonadales	fPseudomonadaceae	Pseudomonas	0.553292	0.454826	0.151116	0.166287	0.218558	0.31511	0.137271	0.049347	0.0491842	0.0981057	0.21931	0.162143	4548119	83.029	5.03977
PS52_18_2_bin.47	dBacteria	pNitrospirota	cRBG-16-64-22	oRBG-16-64-22	fRBG-16-64-22	RBG-16-64-22	0.00256007	0.0027359	0.00131284	0.00164569	0.002341	0.00251304	0.0607592	0.0416471	0.169426	0.136842	0.0421783	0.059243	2278675	78.221	1.04167
PS52_18_2_bin.48	dBacteria	pPseudomonadota	cGammaproteobacteria	oAcidiferrobacterales	fSulfurifustaceae	CAKKRZ01	0.0381326	0.0509345	0.00881598	0.0134476	0.0145671	0.0148746	0.180464	0.127535	0.300633	0.331214	0.108062	0.116997	1850598	64.9898	7.15447
PS52_18_2_bin.49	dBacteria	pPseudomonadota	cGammaproteobacteria	oBurkholderiales	fBurkholderiaceae	Piscinibacter	0.063514	0.0590895	0.080542	0.0771112	0.112041	0.13255	0.0523267	0.0510191	0.326944	0.218261	0.11734	0.0850096	4230322	53.2759	3.44828
PS52_18_2_bin.50	dBacteria	pPseudomonadota	cGammaproteobacteria	oBurkholderiales	fBurkholderiaceae	Ideonella	0.103738	0.0991593	0.68894	0.554686	0.667231	0.604617	0.142212	0.126942	0.104912	0.13101	0.322345	0.252807	3807763	78.6948	2.33112
PS52_18_2_bin.53	dBacteria	pBacteroidota	cBacteroidia	oBacteroidales	fProlixibacteraceae	UBA6024	0.00283614	0.00196658	8.57718e-05	0.000200014	0.000186293	0.000255961	0.200692	0.171244	0.201929	0.537769	0.111708	0.165765	5235176	85.6631	1.6129
PS52_18_2_bin.55	dBacteria	pPseudomonadota	cAlphaproteobacteria	oRhizobiales	fXanthobacteraceae	Afipia	0.0158719	0.0180272	0.107149	0.0874677	0.486355	0.439867	0.201244	0.0362022	0.0466005	0.132305	0.157109	0.1626	2900739	58.0374	2.83052
PS52_18_2_bin.58	dBacteria	pPseudomonadota	cGammaproteobacteria	oBurkholderiales	fSCOH01	NA	0.0524812	0.0239535	0.00339192	0.00421957	0.00384972	0.00427241	0.109317	0.160653	0.360923	0.761992	0.148505	0.230545	4275094	98.2639	0.854701
PS52_18_2_bin.59	dBacteria	pDesulfobacterota	cDesulfobacteria	oDesulfobacterales	fJAHIVH01	JAHIVH01	0.000256953	0.000377192	0.000106475	0.000195926	0.000219605	0.000256735	0.021831	0.0223785	0.142816	0.304407	0.0492846	0.0947356	4860932	94.3728	4.13978
PS52_18_2_bin.6	dBacteria	pPatescibacteria	JAEDAM01	oBD1-5	pPatescibacteria	JABFSX01	0.144853	0.128492	0.0145513	0.021016	0.0251347	0.0307098	5.68986	6.7379	4.10401	4.20773	2.11043	2.60427	1485047	100	0
PS52_18_2_bin.61	dBacteria	pPlanctomycetota	cBrocadiia	oBrocadiales	fBrocadiaceae	JACVXV01	0.0010065	0.00119929	0.0001523	0.000216925	0.000519355	0.000614199	0.0739266	0.0725799	0.361976	0.296509	0.08087	0.128172	3182323	88.4615	3.52148
PS52_18_2_bin.62	dBacteria	pPatescibacteria	cPaceibacteria	oUBA9983A	fUBA9973	UBA9973	0.00129522	0.00138281	0.000238405	0.0003897	0.000806251	0.000936877	0.0864484	0.0523975	0.156959	0.164946	0.04658	0.0635378	556861	81.4	2.33
PS52_18_2_bin.63	dBacteria	pPseudomonadota	cGammaproteobacteria	oBurkholderiales	fSCOH01	NA	0.0325146	0.0314698	0.0124191	0.0144158	0.0128556	0.0136793	0.868612	0.800557	1.07098	2.64628	0.550378	0.807389	4143332	98.7179	0.42735
PS52_18_2_bin.66	dBacteria	pBacteroidota	cIgnavibacteria	oIgnavibacteriales	fMelioribacteraceae	XYB12-FULL-38-5	0.000394492	0.000350028	8.60685e-05	0.000154879	0.000146784	0.000227841	0.0140999	0.00996015	0.0943557	0.228812	0.0348501	0.0702886	2915768	69.3821	6.74115
PS52_18_2_bin.68	dBacteria	pNitrospirota	cThermodesulfovibrionia	oUBA6902	fUBA6902	Glo-13	0.000302142	0.000376239	9.01491e-05	9.45298e-05	0.000196331	0.000193519	0.0417741	0.0338025	0.199808	0.245785	0.0522237	0.0871372	1331617	51.6212	1.81818
PS52_18_2_bin.69	dBacteria	pDesulfobacterota	cDesulfuromonadia	oGeobacterales	fGeobacteraceaeA	VEOV01	0.000488591	0.000572247	8.81626e-05	0.000141825	0.000156777	0.000152325	0.128265	0.130672	0.23118	0.187633	0.0679261	0.087193	1896996	50.4798	3.27957
PS52_18_2_bin.70	dBacteria	pPseudomonadota	cGammaproteobacteria	oXanthomonadales	fXanthomonadaceae	Thermomonas	0.0176357	0.0213074	0.00523481	0.00484982	0.0128237	0.00990267	0.0525183	0.0798549	0.165742	0.155468	0.0525338	0.0585289	1259822	51.465	0.833735
PS52_18_2_bin.71	dBacteria	pChloroflexota	cAnaerolineae	oAnaerolineales	fEnvOPS12	OLB14	0.0040221	0.0047674	0.00247311	0.00381311	0.00614476	0.00671651	0.057198	0.0384122	0.185537	0.285637	0.0594721	0.0924838	3245131	67.8733	0.454545
PS52_18_2_bin.72	dBacteria	pPatescibacteria	cSaccharimonadia	oSaccharimonadales	fJACPYF01	JACPYF01	0.00256507	0.00226864	0.00112773	0.00129867	0.00170171	0.00161616	0.0942103	0.0999647	0.164177	0.220247	0.0589177	0.0772261	558564	65.9248	0
PS52_18_2_bin.73	dBacteria	pDesulfobacterota	cDesulfuromonadia	oGeobacterales	fGeobacteraceaeA	VEOV01	0.000280701	0.000303121	0.00010995	8.96331e-05	0.000245931	0.000273957	0.159878	0.197667	0.220398	0.171298	0.0750455	0.0928548	1179967	52.7035	3.88889
PS52_18_2_bin.74	dBacteria	pPseudomonadota	cGammaproteobacteria	oBurkholderiales	fGallionellaceae	VIKH01	0.00489992	0.00602943	0.00140025	0.00161822	0.00268824	0.0028905	0.0766921	0.0805068	0.247678	0.334633	0.0759037	0.113205	1840116	54.0136	5.49607
PS52_18_2_bin.8	dBacteria	pBacteroidota	cBacteroidia	oBacteroidales	fProlixibacteraceae	UBA6024	0.00157378	0.00133274	0.000159397	0.000282681	0.000247247	0.000323385	0.441374	0.296221	0.190097	0.318775	0.125039	0.162472	5401036	52.4528	7.81362
PS52_18_2_bin.9	dBacteria	pElusimicrobiota	cElusimicrobia	oElusimicrobiales	fUBA9959	UBA9959	0.000532905	0.000682999	0.000466277	0.000449132	0.000979854	0.000942687	0.00332283	0.00690371	0.231425	0.304529	0.0550234	0.107741	2164522	68.0306	1.31086
RC41_B04_2_bin.1	dBacteria	pPseudomonadota	cAlphaproteobacteria	oCaulobacterales	fCaulobacteraceae	Caulobacter	0.0994473	0.0933462	0.0137115	0.0130017	0.00736494	0.00655894	0.00795806	0.00583845	0.00923585	0.00818178	0.0264645	0.0350764	2304325	55.0518	2.30519
RC41_B04_2_bin.10	dBacteria	pPseudomonadota	cGammaproteobacteria	oBurkholderiales	fRhodocyclaceae	Azonexus	0.0575915	0.047005	0.00326401	0.00436094	0.00255262	0.00178521	0.210752	0.166248	0.0961806	0.118253	0.0707992	0.0712245	1762806	50.3491	1.19297
RC41_B04_2_bin.12	dBacteria	pPseudomonadota	cGammaproteobacteria	oBurkholderiales	fBurkholderiaceae	Undibacterium	0.0377356	0.0467495	0.00131853	0.00255687	0.000819823	0.000867957	0.0152707	0.0163766	0.00430388	0.00496372	0.0130963	0.015648	3891115	63.976	0
RC41_B04_2_bin.13	dBacteria	pPseudomonadota	cAlphaproteobacteria	oCaulobacterales	fCaulobacteraceae	Phenylobacterium	0.229646	0.218388	0.0369793	0.0339035	0.0164889	0.0150641	0.0151955	0.0133579	0.023073	0.0154285	0.0617524	0.0815429	3473304	67.5392	3.44828
RC41_B04_2_bin.14	dBacteria	pPseudomonadota	cAlphaproteobacteria	oCaulobacterales	fCaulobacteraceae	Phenylobacterium	0.399668	0.437303	0.031007	0.0304109	0.012909	0.0105718	0.0126018	0.0110964	0.0308406	0.019686	0.0996094	0.159854	2698175	64.8325	2.55489
RC41_B04_2_bin.15	dBacteria	pPseudomonadota	cAlphaproteobacteria	oSphingomonadales	fSphingomonadaceae	Sphingorhabus	0.075648	0.0945812	0.0454073	0.047012	0.0164651	0.0125625	0.0131507	0.0147406	0.0152288	0.01287	0.0347666	0.0284072	2822863	97.1099	0.0731351
RC41_B04_2_bin.17	dBacteria	pPseudomonadota	cAlphaproteobacteria	oSphingomonadales	fSphingomonadaceae	Novosphingobium	1.00968	1.12429	0.589453	0.523509	0.373232	0.295071	0.0751271	0.13881	0.0736607	0.0607226	0.426356	0.367097	3015871	99.4198	0.0487567
RC41_B04_2_bin.18	dBacteria	pPseudomonadota	cGammaproteobacteria	oBurkholderiales	fBurkholderiaceae	Hydrogenophaga	0.214942	0.189183	0.0766575	0.0652356	0.0972099	0.0852954	0.0641811	0.0435796	0.0362438	0.0449899	0.0917517	0.0583263	5070415	99.6729	0.184969
RC41_B04_2_bin.19	dBacteria	pPseudomonadota	cGammaproteobacteria	oBurkholderiales	fBurkholderiaceae	Rhodoferax	0.15687	0.207575	0.00827953	0.00937614	0.00763752	0.00758769	0.0239886	0.0295138	0.0212513	0.0200312	0.0492111	0.0678602	3901206	98.5025	0.46729
RC41_B04_2_bin.2	dBacteria	pPseudomonadota	cGammaproteobacteria	oBurkholderiales	fBurkholderiaceae	Telluria	0.834446	1.02568	0.0440143	0.0525229	0.0236493	0.0222975	0.0289834	0.020388	0.0175663	0.0181663	0.208771	0.363333	5608820	95.8004	1.16961
RC41_B04_2_bin.20	dBacteria	pPseudomonadota	cGammaproteobacteria	oBurkholderiales	fBurkholderiaceae	Rhodoferax	0.288479	0.167811	0.0248564	0.0285643	0.0263703	0.0292561	0.0388234	0.0278291	0.0311004	0.0292463	0.0692337	0.0839864	3946378	99.3524	0.264798
RC41_B04_2_bin.22	dBacteria	pPseudomonadota	cAlphaproteobacteria	oCaulobacterales	fCaulobacteraceae	Caulobacter	0.315454	0.329091	0.0526219	0.0511383	0.0315227	0.021799	0.0105931	0.0139196	0.0245007	0.016647	0.0867287	0.118587	2494018	50.9224	1.75866
RC41_B04_2_bin.23	dBacteria	pPseudomonadota	cGammaproteobacteria	oPseudomonadales	fPseudomonadaceae	Pseudomonas	0.324413	0.363277	0.0126144	0.0132932	0.00596394	0.00511066	0.00346592	0.00370508	0.00251307	0.00220455	0.0736561	0.135424	2412342	56.7053	2.51817
RC41_B04_2_bin.24	dBacteria	pPseudomonadota	cGammaproteobacteria	oPseudomonadales	fPseudomonadaceae	Pseudomonas	0.060418	0.0661154	0.00429174	0.00442649	0.00339368	0.00352126	0.0305916	0.0317316	0.012241	0.0124005	0.0229131	0.0225383	2314408	51.7241	1.72414
RC41_B04_2_bin.3	dBacteria	pPseudomonadota	cGammaproteobacteria	oBurkholderiales	fBurkholderiaceae	Rhodoferax	0.134716	0.172802	0.0055728	0.00620856	0.00791714	0.00791121	1.43597	1.91228	0.781285	0.569729	0.50344	0.645564	3497049	81.1042	0.554907
RC41_B04_2_bin.5	dBacteria	pPseudomonadota	cGammaproteobacteria	oBurkholderiales	fBurkholderiaceae	Undibacterium	0.0638817	0.0415133	0.00284919	0.00479903	0.00756699	0.00852909	0.00778776	0.0083021	0.00781244	0.00541226	0.0158454	0.019169	4171033	97.7092	1.20186
RC41_B04_2_bin.6	dBacteria	pMyxococcota	cPolyangia	oPolyangiales	fSandaracinaceae	NA	0.00922231	0.0149116	0.00313489	0.00277339	0.00519422	0.00427473	0.00233214	0.00184781	0.00319632	0.00240819	0.00492956	0.00389927	7337789	89.7849	4.35484
RC41_B21_3_bin.11	dBacteria	pMyxococcota	cUBA727	oUBA727	fVGSZ01	VGSZ01	0.0437361	0.0212968	0.00260282	0.00310664	0.00191299	0.00173855	0.00248773	0.00116746	0.00192929	0.00178012	0.00817584	0.0131739	6522734	72.9892	7.09677
RC41_B21_3_bin.14	dBacteria	pBacteroidota	cBacteroidia	oFlavobacteriales	fCrocinitomicaceae	Fluviicola	0.0312413	0.0334078	0.00170136	0.00354213	0.0276464	0.0363379	0.0053655	0.000742408	0.000675016	0.00252215	0.0143182	0.0147593	3976869	99.7297	0
RC41_B21_3_bin.18	dBacteria	pPseudomonadota	cGammaproteobacteria	oBurkholderiales	fBurkholderiaceae	Aquabacterium	0.865606	0.913589	0.0337839	0.0416312	0.0214303	0.0215361	0.189801	0.240711	0.288052	0.283627	0.289977	0.316897	2257895	61.7355	1.69607
RC41_B21_3_bin.2	dBacteria	pPseudomonadota	cAlphaproteobacteria	oSphingomonadales	fSphingomonadaceae	Sphingopyxis	0.0328665	0.0440303	0.0334388	0.0247168	0.0353969	0.0300283	0.0151006	0.0118165	0.0153556	0.0120817	0.0254832	0.0107614	2494244	68.2734	1.44482
RC41_B21_3_bin.22	dBacteria	pPseudomonadota	cGammaproteobacteria	oEnterobacteralesA	fDSM-103792	NA	0.102594	0.12692	0.0363346	0.0437415	0.0718887	0.106318	0.00701721	0.00282037	0.00111186	0.00474486	0.0503491	0.0459019	3238595	82.6424	2.23938
RC41_B21_3_bin.24	dBacteria	pPseudomonadota	cGammaproteobacteria	oEnterobacteralesA	fDSM-103792	Permianibacter	0.0467111	0.0866466	0.00833753	0.00800887	0.0326277	0.0442535	0.0350302	0.0275159	0.0347501	0.0511465	0.0375028	0.0214227	3886944	89.1859	2.07207
RC41_B21_3_bin.27	dBacteria	pPseudomonadota	cAlphaproteobacteria	oRhodobacterales	fRhodobacteraceae	Cypionkella	0.0179563	0.0158688	0.00365348	0.00299388	0.00723429	0.00664727	0.00642777	0.0049694	0.00481578	0.00479353	0.00753605	0.00487175	3056505	77.4058	2.36985
RC41_B21_3_bin.28	dBacteria	pBacteroidota	cBacteroidia	oChitinophagales	fChitinophagaceae	Sediminibacterium	0.00549717	0.00175165	0.00177317	0.00227507	0.0124455	0.0171309	0.00399744	0.000744049	0.000822475	0.00245889	0.00488963	0.0052358	3742819	88.9628	1.98686
RC41_B21_3_bin.3	dBacteria	pPseudomonadota	cAlphaproteobacteria	oCaulobacterales	fCaulobacteraceae	Phenylobacterium	0.266908	0.252491	0.0430524	0.0421664	0.0201323	0.0190903	0.0207619	0.0197461	0.0282449	0.0207909	0.0733383	0.093626	3812414	61.8182	3.27586
RC41_B21_3_bin.30	dBacteria	pPseudomonadota	cAlphaproteobacteria	oSphingomonadales	fSphingomonadaceae	Sphingorhabus	0.0331411	0.0458178	0.0160892	0.0150797	0.0124173	0.0110029	0.00490506	0.00460693	0.00401822	0.00386108	0.0150939	0.0132559	2958451	96.6766	0.59727
RC41_B21_3_bin.32	dBacteria	pDependentiae	cBabeliae	oBabeliales	fBabeliaceae	PRDV01	0.0041926	0.00162024	0.00123853	0.00375454	0.00620696	0.00641121	0.00290707	0.00298016	0.0225597	0.012317	0.0064188	0.00617603	1143723	72.9035	0.102145
RC41_B21_3_bin.33	dBacteria	pPseudomonadota	cGammaproteobacteria	oBurkholderiales	fBurkholderiaceae	Rhodoferax	0.365717	0.29136	0.0407185	0.0454357	0.015681	0.0134922	0.0950705	0.12868	0.132361	0.131786	0.12603	0.111552	4274470	57.4565	3.86293
RC41_B44_1_bin.1	dBacteria	pPseudomonadota	cGammaproteobacteria	oBurkholderiales	fBurkholderiaceae	Aquabacterium	0.10415	0.0761607	0.0112474	0.0133442	0.0102207	0.00944045	0.0186169	0.0212013	0.0178315	0.017516	0.0299729	0.0309564	3935666	99.7858	0
RC41_B44_1_bin.10	dBacteria	pBacteroidota	cBacteroidia	oFlavobacteriales	fCrocinitomicaceae	Fluviicola	0.0765474	0.0786409	0.00593979	0.00826367	0.0022775	0.00400988	0.00216747	0.00186133	0.00189182	0.00180757	0.0183407	0.0296983	4325479	97.8018	0.837019
RC41_B44_1_bin.13	dBacteria	pPseudomonadota	cGammaproteobacteria	oBurkholderiales	fBurkholderiaceae	Hydrogenophaga	0.617749	0.812529	3.69159	3.12906	1.11314	0.93664	0.707182	0.701749	0.650038	0.570624	1.29303	1.07696	4159494	76.7018	3.82788
RC41_B44_1_bin.14	dBacteria	pPseudomonadota	cAlphaproteobacteria	oMicavibrionales	fMicavibrionaceae	UBA1573	0.218379	0.128754	0.0636591	0.0910819	0.0110079	0.0140984	0.0367681	0.0472642	0.045877	0.0559129	0.0712802	0.0591128	1957801	94.2857	0.217391
RC41_B44_1_bin.17	dBacteria	pPseudomonadota	cAlphaproteobacteria	oSphingomonadales	fSphingomonadaceae	Aquisediminimonas	0.0212046	0.019148	0.0375502	0.0439313	0.0611386	0.0553998	0.0300037	0.0143028	0.0164821	0.0194294	0.031859	0.0160228	3282229	91.1779	0.434783
RC41_B44_1_bin.19	dBacteria	pMyxococcota	cUBA727	oUBA727	fVGSZ01	VGSZ01	0.0468211	0.0227373	0.00278237	0.00337112	0.00186168	0.0016884	0.00268004	0.00124555	0.00207762	0.00189663	0.00871618	0.0141122	5936536	69.8105	5.20737
RC41_B44_1_bin.2	dBacteria	pPseudomonadota	cAlphaproteobacteria	oSphingomonadales	fSphingomonadaceae	Sphingorhabus	0.00564536	0.00607957	0.0032435	0.00339149	0.10543	0.109126	0.0515471	0.00281633	0.00130964	0.0240376	0.0312626	0.0407256	3132372	98.8423	0.786756
RC41_B44_1_bin.20	dBacteria	pBdellovibrionota	cBdellovibrionia	oBdellovibrionales	fBdellovibrionaceae	Pseudobdellovibrio	0.0477666	0.0443666	0.00739793	0.00978153	0.0052864	0.00536717	0.00431312	0.00438852	0.00524237	0.00480423	0.0138714	0.0161909	3256696	98.1982	1.8018
RC41_B44_1_bin.21	dBacteria	pPseudomonadota	cGammaproteobacteria	oBurkholderiales	fBurkholderiaceae	Pelomonas	0.0247633	0.0170725	0.0120921	0.0102333	0.012928	0.0112107	0.00757376	0.00615912	0.0084076	0.00969792	0.0120138	0.00514933	4650924	85.9443	3.76947
RC41_B44_1_bin.22	dBacteria	pPseudomonadota	cGammaproteobacteria	oPseudomonadales	fPseudomonadaceae	Pseudomonas	0.33774	0.405912	0.0140839	0.0147769	0.00769966	0.00617285	0.00434925	0.00479753	0.00299003	0.00265774	0.0801179	0.146702	3316406	85.2971	1.85499
RC41_B44_1_bin.23	dBacteria	pPseudomonadota	cGammaproteobacteria	oBurkholderiales	fBurkholderiaceae	Undibacterium	0.0748404	0.0732072	0.0083367	0.0117428	0.00198779	0.00265624	0.00483199	0.00479753	0.0057376	0.00469981	0.0192838	0.0274982	6654389	98.5923	2.42364
RC41_B44_1_bin.24	dBacteria	pBacteroidota	cBacteroidia	oNS11-12g	fUKL13-3	JAAFJM01	0.0363486	0.041501	0.00400688	0.00365658	0.00362741	0.00324437	0.0769512	0.108282	0.0528824	0.040802	0.0371302	0.0337904	3441903	76.2698	3.66667
RC41_B44_1_bin.26	dBacteria	pBdellovibrionota	cBdellovibrionia	oBdellovibrionales	fBdellovibrionaceae	UBA2316	0.0613308	0.0703719	0.00480624	0.00952052	0.00754272	0.0151835	0.00570526	0.0015033	0.00132381	0.00273556	0.0180024	0.024327	2609899	52.8584	0.446429
RC41_B44_1_bin.28	dBacteria	pPseudomonadota	cGammaproteobacteria	oBurkholderiales	fBurkholderiaceae	Aquabacterium	0.215874	0.169293	0.0209157	0.0247029	0.0254268	0.0264943	0.0416444	0.0292069	0.0272522	0.0308345	0.0611645	0.0667292	3745248	55.7994	0
RC41_B44_1_bin.29	dBacteria	pMyxococcota	cWYAZ01	oWYAZ01	fWYAZ01	NA	0.178509	0.164118	0.045466	0.0569606	0.0272512	0.0263483	0.0267082	0.0193405	0.0367768	0.0274811	0.0608959	0.0562677	10284818	92.9032	8.1106
RC41_F28_1_bin.11	dBacteria	pPseudomonadota	cGammaproteobacteria	oPseudomonadales	fPseudomonadaceae	Pseudomonas	0.160532	0.188756	0.00585392	0.00687185	0.00350757	0.00365989	0.0111918	0.0127286	0.00608927	0.00690764	0.0406098	0.0673698	3975619	94.125	1.9724
RC41_F28_1_bin.12	dBacteria	pPseudomonadota	cAlphaproteobacteria	oRickettsiales	fRickettsiaceae	GCA-2402195	0.0133327	0.0124749	0.00393712	0.00791406	0.00469595	0.00689238	0.0031091	0.00259552	0.00207602	0.00221394	0.00592416	0.00394627	2164412	85.614	6.69856
RC41_F28_1_bin.13	dBacteria	pPseudomonadota	cGammaproteobacteria	oBurkholderiales	fBurkholderiaceae	Methylibium	0.0242289	0.0246795	0.0266454	0.0202957	0.0316606	0.0299299	0.0101184	0.00743346	0.0148888	0.0118805	0.0201761	0.0081603	2600698	51.2832	2.16511
RC41_F28_1_bin.17	dBacteria	pMyxococcota	cPolyangia	oPolyangiales	fSandaracinaceae	NA	0.13989	0.129897	0.0197488	0.0181543	0.010768	0.00981788	0.0113343	0.00869245	0.01333	0.0121723	0.0373805	0.0489197	8208889	93.0108	4.58781
RC41_F28_1_bin.20	dBacteria	pCyanobacteriota	cSericytochromatia	oUBA7694	fUBA7694	CAJYHH01	0.0331353	0.0195214	0.0340757	0.0276003	0.000963177	0.00209537	0.000449632	0.00278692	0.000855176	0.0006308	0.0122114	0.0138752	4237282	63.4154	3.84615
RC41_F28_1_bin.21	dBacteria	pPseudomonadota	cGammaproteobacteria	oPseudomonadales	fPseudomonadaceae	Pseudomonas	0.591467	0.520087	0.147679	0.168206	0.245631	0.365922	0.145026	0.0475832	0.0488484	0.0702308	0.235068	0.185123	5657002	92.6187	4.03363
RC41_F28_1_bin.22	dBacteria	pPseudomonadota	cGammaproteobacteria	oBurkholderiales	fBurkholderiaceae	Undibacterium	0.0330087	0.0427127	0.00112937	0.0024242	0.000579971	0.000734286	0.0197186	0.0199552	0.00426153	0.00524563	0.012977	0.0143898	3847777	91.4966	2.73572
RC41_F28_1_bin.24	dBacteria	pPseudomonadota	cGammaproteobacteria	oBurkholderiales	fBurkholderiaceae	Rhodoferax	1.20743	1.09935	0.061809	0.0809205	0.0244468	0.0203473	0.663576	0.959576	0.558064	0.650723	0.532624	0.440108	3499860	99.6814	0.654206
RC41_F28_1_bin.25	dBacteria	pPseudomonadota	cGammaproteobacteria	oBurkholderiales	fBurkholderiaceae	Methylibium	0.122337	0.131814	0.48378	0.374155	0.344864	0.329255	0.0619355	0.0844295	0.0463299	0.0467483	0.202565	0.154495	3911195	50.8075	5.59897
RC41_F28_1_bin.26	dBacteria	pPseudomonadota	cAlphaproteobacteria	oSphingomonadales	fSphingomonadaceae	Aquisediminimonas	0.0284082	0.0242308	0.0509016	0.0570907	0.062344	0.0596601	0.0362996	0.0157488	0.0169498	0.0240854	0.0375719	0.0173413	2756666	90.7557	0.434783
RC41_F28_1_bin.31	dBacteria	pBdellovibrionota	cBacteriovoracia	oBacteriovoracales	fBacteriovoracaceae	Bacteriovorax	0.101211	0.043244	0.0102547	0.01672	0.00226315	0.00326055	0.00270944	0.00234221	0.00229763	0.00222962	0.0186532	0.0300963	3227638	87.8795	1.73611
RC41_F28_1_bin.33	dBacteria	pPseudomonadota	cGammaproteobacteria	oBurkholderiales	fBurkholderiaceae	Aquabacterium	1.36408	1.42033	0.0491276	0.0619539	0.0309142	0.0308348	0.242902	0.303901	0.369011	0.363592	0.423665	0.501101	3502578	98.5249	0.0292056
RC41_F28_1_bin.35	dBacteria	pPseudomonadota	cGammaproteobacteria	oBurkholderiales	fRhodocyclaceae	Azonexus	0.0833003	0.0625523	0.00446582	0.00595501	0.00310422	0.0029511	0.282076	0.229753	0.14016	0.166929	0.0981247	0.0972134	4106326	99.6051	0.189573
RC41_F28_1_bin.37	dBacteria	pPseudomonadota	cGammaproteobacteria	oBurkholderiales	fBurkholderiaceae	Paucibacter	0.1506	0.132701	0.0122882	0.0142529	0.00590857	0.00551744	0.0173495	0.0134202	0.0105092	0.0108749	0.0373422	0.0524164	3837341	64.7673	4.28349
RC41_F28_1_bin.38	dBacteria	pPseudomonadota	cAlphaproteobacteria	oRhodobacterales	fRhodobacteraceae	Cypionkella	0.030249	0.0379807	0.0984187	0.0817332	0.0609805	0.0435601	0.02572	0.0226563	0.0219515	0.0204176	0.0443668	0.0259416	3869581	96.6061	2.21717
RC41_F28_1_bin.6	dBacteria	pPseudomonadota	cGammaproteobacteria	oBurkholderiales	fBurkholderiaceae	Telluria	0.511809	0.631455	0.0249728	0.0365435	0.0164292	0.0145546	0.121776	0.120982	0.0468019	0.0413994	0.156672	0.212375	6546965	90.6536	2.45494
RC41_F44_3_bin.11	dBacteria	pMyxococcota	cPolyangia	oPolyangiales	fPolyangiaceae	JAAFHV01	0.0379409	0.0651005	0.076371	0.07259	0.0190966	0.0179171	0.0195423	0.0191516	0.020556	0.0179011	0.0366167	0.0235563	6074669	50.64	4.47005
RC41_F44_3_bin.13	dBacteria	pPseudomonadota	cAlphaproteobacteria	oCaulobacterales	fCaulobacteraceae	Phenylobacterium	0.222316	0.223775	0.0368397	0.0355392	0.0168769	0.0152204	0.0174109	0.0164856	0.0319314	0.020537	0.0636933	0.0800528	3743043	94.4023	2.00216
RC41_F44_3_bin.17	dBacteria	pPseudomonadota	cGammaproteobacteria	oBurkholderiales	fBurkholderiaceae	Rhizobacter	0.114223	0.110192	0.0426124	0.0412239	0.0540317	0.0523197	0.0343181	0.0289335	0.0176401	0.0230812	0.0518576	0.0321371	6167306	97.5078	2.80374
RC41_F44_3_bin.18	dBacteria	pPseudomonadota	cAlphaproteobacteria	oRhodobacterales	fRhodobacteraceae	Cypionkella	0.0112262	0.00869768	0.00374296	0.00301201	0.00342294	0.00363886	0.00357715	0.00313229	0.00435377	0.00304466	0.00478485	0.00267584	3975090	96.8936	0.674603
RC41_F44_3_bin.2	dBacteria	pPseudomonadota	cGammaproteobacteria	oBurkholderiales	fBurkholderiaceae	Aquabacterium	0.17846	0.183022	0.334893	0.290597	0.119548	0.110871	0.0522693	0.0400581	0.026158	0.0306296	0.136651	0.103805	6316952	98.4407	1.40187
RC41_F44_3_bin.20	dBacteria	pPseudomonadota	cGammaproteobacteria	oBurkholderiales	fBurkholderiaceae	Hydrogenophaga	0.207518	0.177431	0.18106	0.139947	0.184742	0.154068	0.107236	0.0517507	0.0495106	0.0660968	0.131936	0.0563087	4540827	89.5275	2.06632
RC41_F44_3_bin.21	dBacteria	pPseudomonadota	cAlphaproteobacteria	oSphingomonadales	fSphingomonadaceae	Sphingobium	0.0544879	0.0507388	0.0142699	0.0131673	0.0215373	0.0165325	0.00908042	0.00761139	0.0162468	0.0104487	0.0214121	0.0160819	5360773	98.4606	3.89078
RC41_F44_3_bin.22	dBacteria	pPseudomonadota	cAlphaproteobacteria	oCaulobacterales	fCaulobacteraceae	Phenylobacterium	0.0147469	0.0164627	0.00568576	0.00511201	0.0140288	0.0118571	0.00551449	0.0038805	0.00779192	0.00609016	0.00911703	0.00443192	4784631	91.1844	3.73377
RC41_F44_3_bin.23	dBacteria	pPseudomonadota	cGammaproteobacteria	oBurkholderiales	fRhodocyclaceae	Methyloversatilis	0.00799605	0.00937838	0.010609	0.0104224	0.030891	0.065236	0.0118906	0.0101298	0.0814243	0.0432785	0.0281256	0.0253368	4066751	95.907	1.62563
RC41_F44_3_bin.24	dBacteria	pMyxococcota	cMyxococcia	oMyxococcales	fMyxococcaceae	JAEUJQ01	0.00706859	0.00836231	0.064334	0.0441715	0.0931223	0.108157	0.0224482	0.00934127	0.00778539	0.0123818	0.0377172	0.036275	8346034	81.9734	1.16487
RC41_F44_3_bin.25	dBacteria	pBacteroidota	cBacteroidia	oChitinophagales	fSaprospiraceae	M3007	0.0380609	0.025206	0.0679447	0.0760857	0.340009	0.447385	0.092624	0.0133645	0.0118451	0.0517146	0.116424	0.142925	6042715	99.505	0.165017
RC41_F44_3_bin.28	dBacteria	pPseudomonadota	cGammaproteobacteria	oBurkholderiales	fBurkholderiaceae	Ideonella	0.37504	0.304231	0.910199	0.789477	0.944858	0.842754	0.215386	0.174286	0.150857	0.157546	0.486464	0.323391	5046476	85.3658	2.08671
RC41_F44_3_bin.29	dBacteria	pPseudomonadota	cGammaproteobacteria	oDSM-16500	fDSM-16500	JAKBCU01	0.0117768	0.0153079	0.00270014	0.00399531	0.00274842	0.00316093	0.000872054	0.000663522	0.000555905	0.000672808	0.00424538	0.00485339	2317045	97.6744	0
RC41_F44_3_bin.30	dBacteria	pPseudomonadota	cGammaproteobacteria	oBurkholderiales	fBurkholderiaceae	Rubrivivax	0.054887	0.0512335	0.150469	0.109322	0.108162	0.0910469	0.046339	0.0367806	0.0314575	0.0321307	0.0711827	0.0388205	5438165	98.567	0.487316
RC41_F44_3_bin.31	dBacteria	pBacteroidota	cBacteroidia	oNS11-12g	fUKL13-3	JAAFJM01	0.0651269	0.0736596	0.00632336	0.0113965	0.00840039	0.0165957	0.00672586	0.00222363	0.00214803	0.00381575	0.0196416	0.0252874	2973257	64.3333	2.56614
RC41_F44_3_bin.34	dBacteria	pPseudomonadota	cGammaproteobacteria	oBurkholderiales	fBurkholderiaceae	Methylibium	0.0187206	0.0306147	0.395467	0.251546	0.388682	0.358483	0.0257972	0.0622331	0.0156546	0.0175732	0.156477	0.161488	2641458	51.3711	2.34403
RC41_F44_3_bin.35	dBacteria	pPseudomonadota	cAlphaproteobacteria	oCaulobacterales	fTH1-2	VFBF01	0.0171783	0.0176173	0.0457476	0.0400294	0.0514452	0.0489606	0.0146683	0.00914788	0.00921313	0.0111095	0.0265117	0.0168013	3804431	97.3485	0.660946
RC41_F44_3_bin.36	dBacteria	pPatescibacteria	cPaceibacteria	oUBA9983A	fUBA2103	C7867-001	0.0525848	0.037406	0.0240213	0.0245476	0.0194374	0.0201053	0.00831569	0.00375782	0.00590371	0.00795854	0.0204038	0.0146435	794902	95.35	0
RC41_F44_3_bin.37	dBacteria	pBacteroidota	cBacteroidia	oChitinophagales	fChitinophagaceae	Sediminibacterium	0.00441579	0.001207	0.00119399	0.00159713	0.0094106	0.0126129	0.00290479	0.000482907	0.000424492	0.0016157	0.00358653	0.00394218	2312182	52.0224	1.35742
RC41_F44_3_bin.39	dBacteria	pPseudomonadota	cAlphaproteobacteria	oRhizobiales	fRhizobiaceae	FKL33	0.00930003	0.00981891	0.00295173	0.0030371	0.00990534	0.00838412	0.00554145	0.00192687	0.00518385	0.0141911	0.00702405	0.0037223	4264746	80.5508	3.47943
RC41_F44_3_bin.5	dBacteria	pPseudomonadota	cGammaproteobacteria	oBurkholderiales	fBurkholderiaceae	Acidovorax	0.125091	0.0860326	0.02247	0.0221105	0.0174039	0.0165622	0.0191124	0.0149252	0.0212319	0.0152096	0.0360149	0.0359441	6597734	65.9875	0
RC41_F44_3_bin.6	dBacteria	pBacteroidota	cBacteroidia	oChitinophagales	fSaprospiraceae	Haliscomenobacter	0.0200613	0.0180277	0.01858	0.0219976	0.0306372	0.0413586	0.0213886	0.00625692	0.0129477	0.0143654	0.0205621	0.00921066	8723880	99.4949	2.0202
RC41_F44_3_bin.8	dBacteria	pPseudomonadota	cGammaproteobacteria	oBurkholderiales	fBurkholderiaceae	Acidovorax	0.416202	0.325834	0.0579151	0.0602048	0.0198303	0.0180842	0.0336076	0.0345931	0.0376457	0.0289523	0.103287	0.136011	5615814	98.8636	2.6738
RC52_B28_1_bin.13	dBacteria	pPseudomonadota	cGammaproteobacteria	oXanthomonadales	fXanthomonadaceae	Pseudoxanthomonas	1.11451	0.810684	0.33537	0.34669	0.0588262	0.0536814	0.0897541	0.0894242	0.098216	0.0730332	0.307019	0.350253	4006947	99.9507	2.1954
RC52_B28_1_bin.20	dBacteria	pPseudomonadota	cGammaproteobacteria	oPseudomonadales	fPseudomonadaceae	Stutzerimonas	0.0116198	0.010581	0.0034307	0.00362146	0.00426542	0.00443432	0.00391209	0.00316318	0.00336858	0.0031498	0.00515464	0.00300991	4613349	99.5902	0.136612
RC52_B28_1_bin.22	dBacteria	pPseudomonadota	cGammaproteobacteria	oBurkholderiales	fRhodocyclaceae	CAJBIL01	0.0991115	0.0818765	0.0049863	0.00490156	0.00678335	0.00604344	0.268126	0.236586	0.166034	0.129158	0.100361	0.0938346	2369907	66.1892	2.64636
RC52_B28_1_bin.24	dBacteria	pPseudomonadota	cGammaproteobacteria	oBurkholderiales	fBurkholderiaceae	Aquabacterium	0.0750066	0.0715704	0.00960354	0.00944138	0.0100849	0.00902125	0.0295392	0.0344597	0.025491	0.0239861	0.0298204	0.0234635	4068854	88.5365	1.22664
RC52_B28_1_bin.25	dBacteria	pPseudomonadota	cAlphaproteobacteria	oRhodobacterales	fRhodobacteraceae	Cypionkella	0.0123562	0.0138775	0.00495378	0.00424522	0.00305547	0.00298981	0.00449086	0.00396188	0.00534874	0.00358119	0.00588607	0.00370051	4112031	99.5354	0
RC52_B28_1_bin.26	dBacteria	pBdellovibrionota	cBdellovibrionia	oBdellovibrionales	fBdellovibrionaceae	Pseudobdellovibrio	0.0720342	0.0568016	0.00975101	0.0155693	0.00676858	0.00796145	0.0060383	0.00665145	0.00783549	0.00743671	0.0196848	0.0227695	3307167	99.0991	0.900901
RC52_B28_1_bin.27	dBacteria	pPseudomonadota	cGammaproteobacteria	oBurkholderiales	fBurkholderiaceae	Undibacterium	0.0333128	0.0276698	0.00141888	0.00210204	0.0046343	0.00505655	0.0198137	0.0250233	0.0193714	0.0149067	0.015331	0.0109301	3500507	81.5565	4.10691
RC52_B28_1_bin.33	dBacteria	pPseudomonadota	cGammaproteobacteria	oBurkholderiales	fBurkholderiaceae	Undibacterium	0.0277654	0.0210957	0.000988045	0.00257845	0.00114042	0.00163982	0.0027965	0.0023649	0.00171547	0.00148848	0.00635732	0.00917594	4515929	92.4121	2.18037
RC52_B28_1_bin.34	dBacteria	pPseudomonadota	cGammaproteobacteria	oBurkholderiales	fRhodocyclaceae	Azonexus	0.068564	0.0531485	0.00401611	0.00491309	0.00291453	0.00258401	0.277946	0.211842	0.140547	0.167623	0.0934099	0.0950312	3138229	88.5404	0.0315956
RC52_B28_1_bin.35	dBacteria	pPseudomonadota	cAlphaproteobacteria	oRhizobiales	fDevosiaceae	Devosia	0.0343322	0.0370183	0.0177931	0.0167671	0.0176368	0.0153603	0.0441453	0.0447892	0.0999861	0.0903938	0.0418222	0.0288547	3706641	78.9381	2.78005
RC52_B28_1_bin.37	dBacteria	pPseudomonadota	cGammaproteobacteria	oBurkholderiales	fRhodocyclaceae	Sulfuritalea	0.0283084	0.0294938	0.00958091	0.00892724	0.0119209	0.0110983	0.111951	0.142125	0.235407	0.215611	0.0804424	0.0848737	2880940	50.2502	2.53913
RC52_B28_1_bin.7	dBacteria	pPseudomonadota	cGammaproteobacteria	oBurkholderiales	fBurkholderiaceae	Undibacterium	0.0642207	0.0747779	0.00215499	0.00445488	0.00128789	0.00127197	0.440867	0.455645	0.0951876	0.0955244	0.123539	0.166519	4006309	84.9897	4.72929
RC52_B28_1_bin.8	dBacteria	pPseudomonadota	cAlphaproteobacteria	oCaulobacterales	fCaulobacteraceae	Brevundimonas	0.0261919	0.0205187	0.0114017	0.0100686	0.0135859	0.0163888	0.00970451	0.00607672	0.0108601	0.00850286	0.01333	0.00579688	2490674	54.3887	0
RC52_B44_1_bin.1	dBacteria	pBacteroidota	cBacteroidia	oBacteroidales	fBacteroidaceae	Prevotella	0.0155441	0.0125763	0.000861527	0.00413275	0.00525258	0.0012889	0.00491859	0.00263768	0.00177961	0.00354513	0.00525372	0.0046661	2108545	98.1794	0
RC52_B44_1_bin.14	dBacteria	pPseudomonadota	cAlphaproteobacteria	oRhizobiales	fDevosiaceae	Devosia	0.0269731	0.0150654	0.00120422	0.00373423	0.00447694	0.00111001	0.00662478	0.00833639	0.00647038	0.00536758	0.00793631	0.0073851	3336522	71.3698	1.69057
RC52_B44_1_bin.16	dBacteria	pBacillota	cClostridia	oTissierellales	fPeptoniphilaceae	Anaerococcus	0.0286281	0.0243054	0.000814282	0.0103541	0.0136163	0.00268794	0.00819878	0.00288821	0.00176067	0.00570193	0.00989557	0.00918025	1470409	58.0168	2.28659
RC52_B44_1_bin.18	dBacteria	pBacillota	cBacilli	oLactobacillales	fLactobacillaceae	Lactobacillus	0.141952	0.119125	0.00637568	0.0280712	0.0283932	0.00716587	0.0343859	0.0281195	0.0204096	0.0239849	0.0437983	0.0445077	2030229	96.7532	0.0927644
RC52_B44_1_bin.19	dBacteria	pPseudomonadota	cGammaproteobacteria	oPseudomonadales	fPseudomonadaceae	Pseudomonas	0.0584436	0.0623757	0.00370116	0.00411444	0.00288044	0.00268241	0.0400463	0.0425192	0.0146099	0.0162706	0.0247644	0.0226043	3211418	80.3702	2.1826
RC52_B44_1_bin.2	dBacteria	pPseudomonadota	cAlphaproteobacteria	oSphingomonadales	fSphingomonadaceae	Sphingorhabus	0.0158889	0.0111251	0.00285886	0.00487444	0.0064909	0.00171612	0.00675219	0.00737525	0.00513257	0.00462719	0.00668415	0.0039268	2553914	93.4038	1.27986
RC52_B44_1_bin.23	dBacteria	pPseudomonadota	cAlphaproteobacteria	oSphingomonadales	fSphingomonadaceae	Novosphingobium	0.0765814	0.0732752	0.0129754	0.0140444	0.00834576	0.00800071	0.533662	0.441459	0.955191	0.555717	0.267925	0.315402	2840364	55.4244	8.87053
RC52_B44_1_bin.24	dBacteria	pActinomycetota	cActinomycetia	oMycobacteriales	fMycobacteriaceae	Corynebacterium	0.083308	0.0535615	0.00911163	0.0255577	0.00978162	0.00642386	0.0305328	0.0370243	0.0262291	0.0190342	0.0300565	0.0223643	1807346	74.7887	4.38501
RC52_B44_1_bin.25	dBacteria	pPseudomonadota	cAlphaproteobacteria	oRhodobacterales	fRhodobacteraceae	Tabrizicola	0.756906	0.78809	0.0416014	0.0519567	0.0289813	0.0302018	0.289127	0.384512	0.524092	0.50814	0.340361	0.283909	3459174	66.8809	0.862069
RC52_B44_1_bin.28	dBacteria	pBacteroidota	cBacteroidia	oChitinophagales	fChitinophagaceae	Sediminibacterium	0.0335561	0.0460464	0.00549634	0.00674548	0.00681726	0.00892317	0.00253009	0.00278951	0.00219471	0.00169138	0.011679	0.0145119	2934338	99.5074	0
RC52_B44_1_bin.3	dBacteria	pBacteroidota	cBacteroidia	oAKYH767	fB-17BO	UBA2475	0.030431	0.0293042	0.0120081	0.0180969	0.0113655	0.0211498	0.00501423	0.00254747	0.00299206	0.00332103	0.013623	0.0101425	4491879	99.5238	1.5873
RC52_B44_1_bin.31	dBacteria	pActinomycetota	cActinomycetia	oMycobacteriales	fMycobacteriaceae	Corynebacterium	0.0343168	0.0241173	0.0041273	0.00650869	0.0097777	0.00354549	0.0109464	0.0132291	0.0105125	0.0078476	0.0124929	0.00912724	1792119	61.3393	6.54762
RC52_B44_1_bin.33	dBacteria	pActinomycetota	cActinomycetia	oActinomycetales	fBrevibacteriaceae	Brevibacterium	0.0232038	0.0184639	0.00151393	0.00413481	0.0175418	0.00233316	0.0126575	0.0141272	0.0130102	0.00712958	0.0114116	0.00699658	2305244	95.0097	0.193798
RC52_B44_1_bin.34	dBacteria	pBacillota	cBacilli	oStaphylococcales	fSalinicoccaceae	Nosocomiicoccus	0.0858199	0.0717522	0.00372983	0.024416	0.0292685	0.00718908	0.0257007	0.0188149	0.0377855	0.0184385	0.0322915	0.0252718	1263144	72.3278	5.22099
RC52_B44_1_bin.35	dBacteria	pBacillota	cClostridia	oTissierellales	fPeptoniphilaceae	Ezakiella	0.064546	0.0535186	0.00236404	0.026624	0.0243678	0.00515413	0.0141681	0.00448407	0.00325662	0.0102173	0.02087	0.0208457	1334036	72.0513	1.1655
RC52_B44_1_bin.37	dBacteria	pMyxococcota	cUBA796	oUBA796	fSXON01	SXON01	0.0125316	0.0135032	0.00380262	0.00334962	0.00486641	0.00439831	0.00172522	0.00158752	0.00554771	0.00456925	0.00558815	0.00391105	5157254	77.2876	3.68814
RC52_B44_1_bin.38	dBacteria	pBacillota	cBacilli	oLactobacillales	fLactobacillaceae	Lactobacillus	0.0108063	0.00417209	0.000157565	0.00120942	0.000770468	0.000645019	0.00313629	0.00189739	0.000867386	0.00178447	0.00254464	0.00298833	1361535	99.41	0.442478
RC52_B44_1_bin.39	dBacteria	pPseudomonadota	cGammaproteobacteria	oBurkholderiales	fBurkholderiaceae	Polaromonas	0.00883849	0.0106371	0.0197227	0.0159074	0.117185	0.102619	0.0483237	0.0141413	0.0161808	0.0237529	0.0377308	0.0377111	3835364	78.9711	2.97631
RC52_B44_1_bin.4	dBacteria	pPseudomonadota	cGammaproteobacteria	oJAGOUN01	fJAGOUN01	NA	0.0294437	0.0220981	0.0239977	0.0192067	0.0279826	0.026335	0.0113999	0.00919257	0.0113247	0.0120875	0.0193068	0.007334	2023755	86.0465	1.74419
RC52_B44_1_bin.41	dBacteria	pPseudomonadota	cGammaproteobacteria	oBurkholderiales	fBurkholderiaceae	Hydrogenophaga	0.0265864	0.0241473	0.0292819	0.0223008	0.0988505	0.0831236	0.0435332	0.0171302	0.0188876	0.0259919	0.0389833	0.02711	2147621	52.4237	2.16511
RC52_B44_1_bin.42	dBacteria	pPseudomonadota	cAlphaproteobacteria	oSphingomonadales	fSphingomonadaceae	Novosphingobium	0.0179234	0.0181085	0.00606254	0.00531567	0.00845472	0.00685276	0.0661874	0.0791968	0.320942	0.132696	0.066174	0.0939722	3166299	98.8794	1.01835
RC52_B44_1_bin.43	dBacteria	pPseudomonadota	cAlphaproteobacteria	oRhizobiales	fRhizobiaceae	Mesorhizobium	0.00410548	0.00454682	0.00482785	0.00255845	0.0215521	0.0195872	0.0106987	0.00254862	0.00678911	0.00923672	0.0086451	0.00648476	4048249	87.6486	2.56148
RC52_B44_1_bin.45	dBacteria	pPseudomonadota	cGammaproteobacteria	oBurkholderiales	fBurkholderiaceae	Acidovorax	0.671325	0.489926	0.183133	0.189409	0.0269232	0.0243553	0.047295	0.0478187	0.0553017	0.040216	0.17757	0.213383	2537265	63.1877	0.974026
RC52_B44_1_bin.47	dBacteria	pPseudomonadota	cAlphaproteobacteria	oCaulobacterales	fCaulobacteraceae	Caulobacter	0.293924	0.30953	0.0518936	0.0495062	0.0317668	0.0212951	0.010439	0.0138658	0.0245691	0.0171584	0.0823948	0.110507	2984575	65.3135	0.862069
RC52_B44_1_bin.48	dBacteria	pActinomycetota	cActinomycetia	oMycobacteriales	fMycobacteriaceae	Corynebacterium	0.0584301	0.0417967	0.00443161	0.00900526	0.0249146	0.0043592	0.0248823	0.0279487	0.0232685	0.0162194	0.0235256	0.0160366	1934170	82.2565	2.43689
RC52_B44_1_bin.49	dBacteria	pPseudomonadota	cGammaproteobacteria	oBurkholderiales	fNeisseriaceae	QFNR01	0.0906323	0.0577271	0.00275005	0.0206431	0.00322139	0.00244577	0.021995	0.0235991	0.0117692	0.0112899	0.0246073	0.0269224	1209900	85.1719	2.46104
RC52_B44_1_bin.51	dBacteria	pPseudomonadota	cGammaproteobacteria	oEnterobacteralesA	fAlteromonadaceae	Pararheinheimera	0.206587	0.161645	0.0134384	0.020748	0.00361879	0.00463093	0.00782094	0.00601019	0.00568676	0.00552292	0.0435709	0.0711539	4564349	97.7699	0.785634
RC52_B44_1_bin.52	dBacteria	pActinomycetota	cActinomycetia	oMycobacteriales	fMycobacteriaceae	Corynebacterium	0.0691518	0.0546267	0.00474071	0.0125062	0.0392397	0.0056643	0.0255414	0.0252498	0.0329454	0.0164281	0.0286094	0.0199424	2011471	89.5586	2.05099
RC52_B44_1_bin.53	dBacteria	pMyxococcota	cMyxococcia	oMyxococcales	fMyxococcaceae	JAEUJQ01	0.00636071	0.00806399	0.102717	0.10948	0.0226863	0.0260634	0.00992985	0.0160127	0.00805703	0.00736529	0.0316736	0.0377863	7750485	90.3226	1.02663
RC52_B44_1_bin.54	dBacteria	pBacteroidota	cBacteroidia	oBacteroidales	fBacteroidaceae	Prevotella	0.0177539	0.0125836	0.000824	0.00466606	0.00397187	0.00091635	0.00440442	0.00290943	0.00184753	0.0023169	0.0052194	0.00526152	2577003	88.4802	1.64171
RC52_B44_1_bin.55	dBacteria	pPseudomonadota	cGammaproteobacteria	oBurkholderiales	fBurkholderiaceae	Giesbergeria	0.0193765	0.0204735	0.00499521	0.00451485	0.00503592	0.00427822	0.195984	0.386932	0.271929	0.199287	0.111281	0.13373	4045252	74.3516	9.68164
RC52_B44_1_bin.56	dBacteria	pPseudomonadota	cGammaproteobacteria	oBurkholderiales	fBurkholderiaceae	Rhodoferax	0.15561	0.136175	0.0404034	0.0432632	0.0125825	0.0100706	0.159666	0.203652	0.285455	0.254859	0.130174	0.0951185	2612586	50.2378	2.00315
RC52_B44_1_bin.57	dBacteria	pPseudomonadota	cGammaproteobacteria	oBurkholderiales	fBurkholderiaceae	Giesbergeria	0.0526487	0.0585603	0.00934698	0.00841461	0.0107436	0.00920897	0.393531	0.691121	0.424587	0.371845	0.203001	0.233565	2293972	55.5185	1.15951
RC52_B44_1_bin.58	dBacteria	pPseudomonadota	cAlphaproteobacteria	oReyranellales	fReyranellaceae	Reyranella	0.204084	0.256085	0.108579	0.115618	0.286654	0.268133	0.111862	0.0298227	0.0380591	0.0580569	0.147695	0.0930241	4124496	73.6774	3.14777
RC52_B44_1_bin.59	dBacteria	pBacillota	cBacilli	oLactobacillales	fStreptococcaceae	Streptococcus	0.0616626	0.0482573	0.00260382	0.0177589	0.00512173	0.00370826	0.0253736	0.029559	0.0158114	0.0168798	0.0226736	0.0184519	1248487	67.7743	4.29615
RC52_B44_1_bin.6	dBacteria	pPseudomonadota	cGammaproteobacteria	oBurkholderiales	fBurkholderiaceae	Polaromonas	0.0483249	0.067195	0.0512485	0.0290228	0.0368688	0.0378578	0.116946	0.146115	0.170692	0.116783	0.0821053	0.0484755	4608542	96.9364	0.687305
RC52_B44_1_bin.60	dBacteria	pActinomycetota	cActinomycetia	oMycobacteriales	fMycobacteriaceae	Corynebacterium	0.0988598	0.0685793	0.00553546	0.0258244	0.0199808	0.00529555	0.028781	0.0284925	0.0184598	0.0224213	0.032223	0.0277518	1393703	65.7089	3.94273
RC52_B44_1_bin.61	dBacteria	pPseudomonadota	cGammaproteobacteria	oBurkholderiales	fBurkholderiaceae	Hydrogenophaga	0.0451303	0.0424819	0.150968	0.106729	0.274703	0.223958	0.146626	0.0523561	0.0530447	0.0859642	0.118196	0.076409	2969637	61.8892	2.71807
RC52_B44_1_bin.62	dBacteria	pPseudomonadota	cAlphaproteobacteria	oCaulobacterales	fCaulobacteraceae	Phenylobacterium	0.0455904	0.0527878	0.00647464	0.00657772	0.00860907	0.00739302	0.00882403	0.00770977	0.0338669	0.0212522	0.0199086	0.0168862	4966398	51.5094	9.03709
RC52_B44_1_bin.8	dBacteria	pBacillota	cClostridia	oTissierellales	fPeptoniphilaceae	Anaerococcus	0.0149808	0.00932694	0.000428658	0.00338497	0.00396114	0.000939052	0.0047272	0.00256808	0.00145257	0.00261653	0.00443859	0.00424872	1945759	52.8997	3.44828
RC52_F14_3_bin.10	dBacteria	pPseudomonadota	cGammaproteobacteria	oBurkholderiales	fBurkholderiaceae	Rhodoferax	0.0187382	0.0177238	0.00380092	0.00369963	0.00365992	0.00340607	1.56377	2.24041	1.28091	1.29695	0.643307	0.81547	3830350	88.007	0.977414
RC52_F14_3_bin.11	dBacteria	pPseudomonadota	cAlphaproteobacteria	oRhizobiales	fRhizobiaceae	Aminobacter	0.00500451	0.00549506	0.00325159	0.00248599	0.0107408	0.0103689	0.00433338	0.00189387	0.00393859	0.00461423	0.00521269	0.00286913	4867555	91.1753	0.478142
RC52_F14_3_bin.12	dBacteria	pPseudomonadota	cGammaproteobacteria	oBurkholderiales	fBurkholderiaceae	Giesbergeria	0.0198101	0.0206431	0.00520199	0.00473479	0.00532337	0.00446557	0.23228	0.414475	0.393212	0.26965	0.13698	0.163203	2966160	73.5312	2.35247
RC52_F14_3_bin.13	dBacteria	pPseudomonadota	cGammaproteobacteria	oBurkholderiales	fNeisseriaceae	QFNR01	0.0838451	0.0524719	0.00257296	0.0188924	0.00288765	0.00245525	0.0203137	0.0223419	0.0113183	0.010969	0.0228068	0.0247385	1133765	82.4324	0.452489
RC52_F14_3_bin.14	dBacteria	pPseudomonadota	cGammaproteobacteria	oEnterobacteralesA	fAlteromonadaceae	Pararheinheimera	0.0758521	0.047704	0.00437222	0.0171168	0.00576277	0.00272175	0.0258258	0.0325669	0.0239775	0.0151645	0.0251064	0.0214734	5256514	97.1579	0.355406
RC52_F14_3_bin.16	dBacteria	pPseudomonadota	cGammaproteobacteria	oBurkholderiales	fBurkholderiaceae	Giesbergeria	0.0129833	0.0133902	0.00358781	0.00332356	0.00373268	0.00338126	0.171279	0.353193	0.276163	0.18773	0.102876	0.126551	3995782	84.8451	8.39646
RC52_F14_3_bin.17	dBacteria	pPseudomonadota	cGammaproteobacteria	oBurkholderiales	fBurkholderiaceae	Acidovorax	0.172415	0.13136	0.0304657	0.0309089	0.00991436	0.00877564	0.0373078	0.0407504	0.0502111	0.0313859	0.0543495	0.0510502	4479729	80.7355	0.473485
RC52_F14_3_bin.18	dBacteria	pActinomycetota	cActinomycetia	oActinomycetales	fMicrococcaceae	Micrococcus	0.136561	0.101995	0.0121821	0.019518	0.0129268	0.0106401	0.0644929	0.0723466	0.0478787	0.0415851	0.0520126	0.0402783	1843020	74.6134	1.99159
RC52_F14_3_bin.22	dBacteria	pBacillota	cBacilli	oLactobacillales	fLactobacillaceae	Lactobacillus	0.123043	0.102326	0.00532819	0.0237744	0.0242681	0.00601644	0.0293827	0.0246967	0.0176248	0.0211538	0.0377615	0.0384723	1467767	65.3424	1.25077
RC52_F14_3_bin.24	dBacteria	pPatescibacteria	JAEDAM01	oBD1-5	pPatescibacteria	CAIVSN01	0.0319603	0.0305487	0.00153076	0.00222739	0.000496325	0.000750801	0.553214	0.671879	0.0829836	0.110359	0.148595	0.236155	1104011	97.67	2.33
RC52_F14_3_bin.25	dBacteria	pActinomycetota	cActinomycetia	oActinomycetales	fBrevibacteriaceae	Brevibacterium	0.018638	0.0155726	0.00125611	0.00280138	0.0112518	0.00195308	0.00939304	0.0115736	0.0113391	0.00528658	0.00890654	0.00561393	1670170	82.7519	1.93798
RC52_F14_3_bin.30	dBacteria	pPseudomonadota	cAlphaproteobacteria	oCaulobacterales	fCaulobacteraceae	Phenylobacterium	0.536333	0.484191	0.0611638	0.136765	0.0636042	0.0477382	0.236274	0.258421	0.183919	0.171172	0.217958	0.161722	2428803	56.557	2.53247
RC52_F14_3_bin.32	dBacteria	pActinomycetota	cActinomycetia	oMycobacteriales	fMycobacteriaceae	Corynebacterium	0.0351867	0.0212836	0.00742749	0.0109117	0.0108106	0.00477429	0.0120998	0.0129198	0.011583	0.00912596	0.0136123	0.00826331	2216807	81.9715	4.90455
RC52_F14_3_bin.33	dBacteria	pPlanctomycetota	cBrocadiia	oBrocadiales	fScalinduaceae	Scalindua	0.0058461	0.00962547	0.0010165	0.00175966	0.00228841	0.00366943	0.13107	0.0869332	0.301645	0.285523	0.0829376	0.113408	1644135	50.6889	5.68182
RC52_F14_3_bin.35	dBacteria	pPseudomonadota	cAlphaproteobacteria	oCaulobacterales	fCaulobacteraceae	Caulobacter	0.0428345	0.0424246	0.0103452	0.0104859	0.0117422	0.01042	0.106077	0.18117	0.272947	0.126659	0.0815106	0.0850153	4146023	100	1.68831
RC52_F14_3_bin.38	dBacteria	pPseudomonadota	cGammaproteobacteria	oBurkholderiales	fRhodocyclaceae	CAJBIL01	0.192862	0.136973	0.00947509	0.00967644	0.00891266	0.0072438	0.409217	0.514477	0.432011	0.312251	0.20331	0.189527	2611806	67.8621	1.56816
RC52_F14_3_bin.41	dBacteria	pPseudomonadota	cGammaproteobacteria	oBurkholderiales	fBurkholderiaceae	Aquabacterium	0.463372	0.486669	0.0251575	0.0312903	0.0143682	0.013894	0.555243	0.681815	0.5488	0.537531	0.335814	0.262516	2692710	74.7324	0.525701
RC52_F14_3_bin.44	dBacteria	pActinomycetota	cAcidimicrobiia	oUBA5794	fUBA11373	NA	0.000949942	0.00112179	0.000692467	0.00071765	0.00215299	0.00154071	0.017219	0.016109	0.0737468	0.0560273	0.0170278	0.0249887	1955732	75.8068	5.55556
RC52_F14_3_bin.45	dBacteria	pActinomycetota	cActinomycetia	oPropionibacteriales	fPropionibacteriaceae	Cutibacterium	0.163161	0.118687	0.0118518	0.0351915	0.0156409	0.0102593	0.0794075	0.0862448	0.0611128	0.068647	0.0650204	0.0472772	2403648	99.8904	0.657895
RC52_F14_3_bin.47	dBacteria	pBacteroidota	cUBA10030	oUBA10030	fUBA8401	NA	0.000801796	0.000776767	0.000288637	0.000496693	0.000798277	0.00119805	0.0103082	0.00547823	0.0213216	0.0214658	0.00629339	0.00811935	2017349	93.6066	1.63934
RC52_F14_3_bin.49	dBacteria	pActinomycetota	cActinomycetia	oMycobacteriales	fMycobacteriaceae	Corynebacterium	0.0167267	0.0130874	0.00115085	0.00209168	0.00250585	0.000787159	0.0142076	0.0185666	0.00900772	0.00665011	0.00847817	0.00645606	1970868	87.6456	1.40235
RC52_F14_3_bin.5	dBacteria	pPseudomonadota	cGammaproteobacteria	oBurkholderiales	fBurkholderiaceae	Rhodoferax	0.0235427	0.0207345	0.0047025	0.0048062	0.00647436	0.00654679	0.205767	0.328408	0.265029	0.198568	0.106458	0.121508	4580182	81.3448	1.82243
RC52_F14_3_bin.50	dBacteria	pAcidobacteriota	cHolophagae	oHolophagales	fHolophagaceae	JAFDVN01	0.0821834	0.10784	0.00590829	0.00588173	0.0407487	0.039221	0.0367425	0.0303797	0.0383396	0.0395674	0.0426812	0.0295691	2562254	67.723	1.05994
RC52_F14_3_bin.51	dBacteria	pPseudomonadota	cGammaproteobacteria	oPseudomonadales	fPseudomonadaceae	Pseudomonas	0.0136469	0.0140142	0.00243393	0.00291625	0.00281772	0.00294156	0.00925827	0.00674783	0.00335188	0.00385245	0.00619811	0.00432225	3222325	66.7069	2.20367
RC52_F14_3_bin.6	dBacteria	pPseudomonadota	cGammaproteobacteria	oBurkholderiales	fBurkholderiaceae	Undibacterium	0.0189213	0.0139752	0.000988931	0.00150061	0.00456676	0.00488185	0.0112854	0.0128641	0.0118001	0.0077768	0.0088561	0.00556326	3560031	85.7334	2.63327
RC52_F14_3_bin.7	dBacteria	pPseudomonadota	cGammaproteobacteria	oBurkholderiales	fRhodocyclaceae	Sulfuritalea	0.0312339	0.0323267	0.0113936	0.0107528	0.0140439	0.0129452	0.123704	0.16755	0.282877	0.262899	0.0949725	0.102442	4200356	75.6188	2.63916
RC52_F14_3_bin.8	dBacteria	pPlanctomycetota	cBrocadiia	oBrocadiales	fBrocadiaceae	XYD2-FULL-41-16	0.0183422	0.0259046	0.00258283	0.00566977	0.00636157	0.00877802	0.248903	0.167922	0.655398	0.613556	0.175342	0.242871	951375	50.5495	2.40642
RC52_F28_3_bin.1	dBacteria	pPseudomonadota	cGammaproteobacteria	oPseudomonadales	fPseudomonadaceae	Pseudomonas	0.0750979	0.076523	0.00430126	0.0046209	0.00321553	0.00295233	0.0471018	0.0465113	0.0177877	0.0182837	0.0296395	0.0279319	3816366	91.7033	0.179582
RC52_F28_3_bin.11	dBacteria	pPseudomonadota	cGammaproteobacteria	oEnterobacteralesA	fAlteromonadaceae	Pararheinheimera	0.148745	0.108081	0.00565893	0.00616646	0.00609249	0.00537346	0.325763	0.396879	0.323632	0.236624	0.156302	0.146289	4623071	98.6893	1.17685
RC52_F28_3_bin.17	dBacteria	pPseudomonadota	cGammaproteobacteria	oBurkholderiales	fBurkholderiaceae	Hydrogenophaga	0.125453	0.15772	0.448658	0.385923	0.371555	0.322391	0.15557	0.0943323	0.0825032	0.0998496	0.224396	0.133857	4172728	85.0954	3.81764
RC52_F28_3_bin.19	dBacteria	pActinomycetota	cActinomycetia	oActinomycetales	fCellulomonadaceae	JAJDFX01	0.0127565	0.0106428	0.00210258	0.00199085	0.00342654	0.00284095	0.440582	0.418575	0.952352	0.418269	0.226354	0.306461	3234230	70.15	1.12717
RC52_F28_3_bin.25	dBacteria	pPseudomonadota	cGammaproteobacteria	oXanthomonadales	fXanthomonadaceae	Arenimonas	0.0220332	0.0279126	0.00923342	0.00841291	0.0269118	0.0238164	0.00865588	0.00555008	0.0138743	0.0114825	0.0157883	0.00805878	3322729	98.6782	0.465517
RC52_F28_3_bin.26	dBacteria	pPseudomonadota	cGammaproteobacteria	oPseudomonadales	fPseudomonadaceae	Pseudomonas	0.222041	0.21013	0.0360359	0.0386822	0.0380525	0.0393474	0.0437339	0.0332112	0.0259175	0.0222326	0.0709384	0.0728746	5317333	89.5611	3.76806
RC52_F28_3_bin.28	dBacteria	pPseudomonadota	cGammaproteobacteria	oEnterobacterales	fEnterobacteriaceae	Pantoea	0.0180414	0.0137869	0.000806575	0.00142443	0.00110665	0.00504067	0.00460921	0.00284046	0.00725463	0.0130267	0.00679376	0.00578765	4797688	98.623	1.20297
RC52_F28_3_bin.29	dBacteria	pBacteroidota	cBacteroidia	oChitinophagales	fChitinophagaceae	Sediminibacterium	0.0111982	0.0117451	0.0038546	0.00351488	0.00367422	0.00313096	0.205051	0.474355	0.323415	0.215049	0.125499	0.161467	3345024	99.0148	0
RC52_F28_3_bin.32	dBacteria	pPseudomonadota	cAlphaproteobacteria	oCaulobacterales	fCaulobacteraceae	Phenylobacterium	0.437956	0.45985	0.03938	0.0532809	0.0264569	0.0221941	0.0967999	0.106304	0.0944031	0.0774629	0.141409	0.156355	4157430	99.543	1.67749
RC52_F28_3_bin.33	dBacteria	pCyanobacteriota	cSericytochromatia	oUBA7694	fUBA7694	GCA-2770975	0.0225444	0.0187871	0.0113516	0.0243481	0.0016387	0.00135497	0.0019846	0.0028367	0.0032265	0.00414209	0.00922148	0.00881256	3999864	52.6591	3.4188
RC52_F28_3_bin.34	dBacteria	pPseudomonadota	cGammaproteobacteria	oBurkholderiales	fBurkholderiaceae	Rhodoferax	0.139722	0.0844708	0.0131217	0.0147823	0.0140558	0.0157376	0.0217972	0.0162533	0.0171377	0.016118	0.0353196	0.0403874	2842157	72.6697	2.42601
RC52_F28_3_bin.40	dBacteria	pPseudomonadota	cGammaproteobacteria	oPseudomonadales	fPseudomonadaceae	Pseudomonas	0.013835	0.0143407	0.0024895	0.00256608	0.00275046	0.0028682	0.0094812	0.00658077	0.00334294	0.00375364	0.00620084	0.00446761	3577279	61.1643	0
RC52_F28_3_bin.41	dBacteria	pPseudomonadota	cGammaproteobacteria	oBurkholderiales	fBurkholderiaceae	Hydrogenophaga	0.0303517	0.0285082	0.0348847	0.0275976	0.105474	0.0885553	0.0463039	0.0184645	0.0204329	0.0280534	0.0428627	0.0282787	3637599	73.2645	4.50402
RC52_F28_3_bin.7	dBacteria	pPseudomonadota	cGammaproteobacteria	oBurkholderiales	fBurkholderiaceae	Hydrogenophaga	0.0283859	0.0263423	0.0353553	0.0273885	0.0643837	0.0589658	0.0419526	0.0190738	0.0188856	0.0251785	0.0345912	0.0150697	3521179	90.2083	1.51869
RC52_F28_3_bin.9	dBacteria	pBacteroidota	cUBA10030	oUBA10030	fUBA8401	NA	0.000322443	0.000303997	0.000150668	0.000279583	0.00030144	0.000358776	0.00694886	0.00323289	0.0147297	0.0148562	0.00414846	0.00569938	1405549	76.3115	1.38434
RC52_F44_2_bin.10	dBacteria	pPseudomonadota	cAlphaproteobacteria	oRhizobiales	fRhizobiaceae	Mesorhizobium	0.00409425	0.00465048	0.00509694	0.0026702	0.020379	0.0184036	0.00963734	0.00234294	0.00601669	0.00818459	0.0081476	0.00602673	4778787	82.1338	3.50286
RC52_F44_2_bin.12	dBacteria	pPseudomonadota	cGammaproteobacteria	oBurkholderiales	fBurkholderiaceae	Undibacterium	0.0679903	0.0538308	0.00319446	0.00977292	0.00752965	0.00614208	0.0293966	0.0360068	0.025963	0.022538	0.0262365	0.0204444	2440629	55.3185	7.61952
RC52_F44_2_bin.16	dBacteria	pPseudomonadota	cAlphaproteobacteria	oCaulobacterales	fCaulobacteraceae	Brevundimonas	0.124216	0.150464	0.020089	0.0174407	0.0356974	0.0303213	0.0191259	0.018895	0.0415785	0.0295033	0.0487331	0.0453248	3389674	99.2424	1.40693
RC52_F44_2_bin.17	dBacteria	pPseudomonadota	cAlphaproteobacteria	oRhizobiales	fDevosiaceae	Devosia	0.665501	1.14944	0.031448	0.502166	0.0476425	0.0233124	0.0644973	0.322553	0.0845265	0.0565483	0.294764	0.356338	3627915	86.3173	2.78005
RC52_F44_2_bin.21	dBacteria	pBdellovibrionota	cBdellovibrionia	oBdellovibrionales	fBdellovibrionaceae	Pseudobdellovibrio	0.044051	0.0335248	0.00352014	0.00728433	0.00092823	0.00100686	0.000165041	0.000562183	0.000706901	0.000550356	0.00922998	0.0151028	2217477	66.1324	2.07708
RC52_F44_2_bin.23	dBacteria	pPseudomonadota	cGammaproteobacteria	oBurkholderiales	fBurkholderiaceae	Rhodoferax	0.158092	0.140203	0.0424771	0.0465784	0.0116731	0.00900738	0.179929	0.227683	0.322165	0.29403	0.143184	0.108758	4191535	59.8119	3.44828
RC52_F44_2_bin.24	dBacteria	pPseudomonadota	cGammaproteobacteria	oBurkholderiales	fRhodocyclaceae	Methyloversatilis	0.00602268	0.0071413	0.00331714	0.0030377	0.00524102	0.00554143	0.00481224	0.00427184	0.0115523	0.00925216	0.00601899	0.00252707	4243736	96.7158	1.38506
RC52_F44_2_bin.25	dBacteria	pPseudomonadota	cGammaproteobacteria	oBurkholderiales	fBurkholderiaceae	Aquabacterium	0.577465	0.611232	0.0234041	0.0292078	0.0147192	0.0146532	0.243081	0.327275	0.493207	0.47833	0.281257	0.235817	2577491	69.7364	3.49299
RC52_F44_2_bin.26	dBacteria	pPseudomonadota	cAlphaproteobacteria	oRhizobiales	fPhreatobacteraceae	Phreatobacter	0.00651421	0.00730531	0.00504087	0.00476504	0.0106064	0.010054	0.00442508	0.00272643	0.00645871	0.0059337	0.00638297	0.00232404	4439397	99.5781	0.316456
RC52_F44_2_bin.29	dBacteria	pPseudomonadota	cAlphaproteobacteria	oSphingomonadales	fSphingomonadaceae	Sphingomonas	0.014155	0.00946181	0.00192388	0.00170001	0.00489549	0.00406965	0.0694468	0.0818556	0.0490397	0.0542933	0.0290841	0.0295872	4033831	99.5449	2.05103
RC52_F44_2_bin.33	dBacteria	pPatescibacteria	cPaceibacteria	oUBA9983A	fGWA1-40-21	GWA1-40-21	0.110717	0.106026	0.0137983	0.0137932	0.00626434	0.00487927	0.788689	0.701516	1.79434	1.62631	0.516633	0.658296	842102	81.4	2.33
RC52_F44_2_bin.36	dBacteria	pBacillota	cBacilli	oErysipelotrichales	fErysipelotrichaceae	UBA2212	0.0342441	0.0316955	0.0461954	0.0355804	0.126094	0.104936	0.0541692	0.0206649	0.0224405	0.0319867	0.0508007	0.0340141	1321630	56.4461	0.786164
RC52_F44_2_bin.40	dBacteria	pCyanobacteriota	cSericytochromatia	oUBA7694	fUBA7694	GCA-2770975	0.0336835	0.0283597	0.0173768	0.0378059	0.00202761	0.00177812	0.00217533	0.00315734	0.00337107	0.00529268	0.0135028	0.0138137	5148266	72.874	2.65907
RC52_F44_2_bin.41	dBacteria	pPseudomonadota	cGammaproteobacteria	oBurkholderiales	fBurkholderiaceae	Giesbergeria	0.238936	0.150517	0.0132147	0.0971026	0.0333226	0.0149963	0.262084	0.432852	0.390643	0.288427	0.19221	0.145973	3051825	73.8904	1.26263
RC52_F44_2_bin.43	dBacteria	pBacteroidota	cBacteroidia	oFlavobacteriales	fVicingaceae	Vicingus	0.00745759	0.00413348	0.000704013	0.0014895	0.00104344	0.00151475	0.0278167	0.0312231	0.040925	0.0268606	0.0143168	0.0147448	3485204	100	0.358423
RC52_F44_2_bin.45	dBacteria	pPseudomonadota	cGammaproteobacteria	oBurkholderiales	fBurkholderiaceae	Polaromonas	0.00711366	0.00870906	0.0112662	0.00861049	0.202911	0.174095	0.0698949	0.00851818	0.00856209	0.0281573	0.0527838	0.0705494	3809370	89.0249	1.16822
RC52_F44_2_bin.46	dBacteria	pMyxococcota	cMyxococcia	oMyxococcales	fMyxococcaceae	JAEUJQ01	0.00347207	0.00337157	0.0134392	0.0114527	0.0171745	0.0166446	0.00488411	0.00294676	0.00331207	0.00399302	0.00806906	0.00561748	9360190	96.7742	1.09831
RC52_F44_2_bin.47	dBacteria	pPseudomonadota	cGammaproteobacteria	oBurkholderiales	fBurkholderiaceae	Acidovorax	0.36621	0.2876	0.0560179	0.0603657	0.0132379	0.0120543	0.0244072	0.0220721	0.0261962	0.0199735	0.0888135	0.121333	3073783	63.4289	1.95286
RC52_F44_2_bin.48	dBacteria	pPseudomonadota	cAlphaproteobacteria	oCaulobacterales	fCaulobacteraceae	Caulobacter	0.122815	0.120349	0.0258323	0.0246334	0.0173332	0.0136086	0.0117852	0.0126032	0.0212463	0.0162065	0.0386413	0.0417223	4837763	54.3103	9.82759
RC52_F44_2_bin.6	dBacteria	pPseudomonadota	cAlphaproteobacteria	oCaulobacterales	fCaulobacteraceae	Brevundimonas	0.0317797	0.0260322	0.0144236	0.0120538	0.0157857	0.0201378	0.0116855	0.00789294	0.0127112	0.0103728	0.0162875	0.00714747	2583717	63.9393	4.61039
RC52_F44_2_bin.7	dBacteria	pPseudomonadota	cAlphaproteobacteria	oCaulobacterales	fCaulobacteraceae	Brevundimonas	0.0286677	0.033575	0.0110606	0.0099732	0.0176971	0.0142605	0.00850674	0.00840473	0.0191692	0.0133257	0.016464	0.00815386	2944528	51.2069	0.862069
RC52_F44_2_bin.8	dBacteria	pPseudomonadota	cGammaproteobacteria	oBurkholderiales	fNitrosomonadaceae	Nitrosomonas	0.0423356	0.0598913	0.0025065	0.00482798	0.0053047	0.00774103	0.112946	0.079372	0.0910399	0.0594642	0.0465429	0.0383607	2412183	98.5247	0
RC52_F44_2_bin.9	dBacteria	pPseudomonadota	cGammaproteobacteria	oBurkholderiales	fBurkholderiaceae	Rhodoferax	0.0747001	0.0692944	0.0110337	0.0105251	0.00685758	0.00554993	0.469893	0.615545	0.512264	0.524614	0.230028	0.248776	6344904	91.4491	2.72586

## Sheet: Table S3
Table S3: Normalized genome coverages, average coverage, standard deviation, genome sizes, genome completeness, and contamination of 891 bins from planktonic communities in the previous study (Chaudhari et al., 2019; Overholt et al., 2021).
MAG name	GTDB taxonomy_Kingdom	Phylum	Class	Order	Family	Genus	Species	H14 0.2μm	H32 0.2μm	H41 0.2μm	H43 0.2μm	H51 0.2μm	H52 0.2μm	Average_planktonic	Std. dev	Genome size	Completeness	Contamination
H14-bin002_1	d__Bacteria	p__Proteobacteria	c__Alphaproteobacteria	o__Sphingomonadales	f__Sphingomonadaceae	g__Sphingobium	s__Sphingobium xenophagum	0.0241647	0.00590879	0.000672531	0.00319722	0.00217268	0.651282	0.114566	1.72871	3197162	94.3662	0
H14-bin003_1	d__Archaea	p__Nanoarchaeota	c__Nanoarchaeia	o__Pacearchaeales	f__GW2011-AR1	g__	s__	0.699178	0.000442279	6.51674e-05	0.000701825	0.000272437	0.412862	0.185587	1.02431	554999	55.2632	0
H14-bin004_1	d__Bacteria	p__Patescibacteria	c__Microgenomatia	o__GWA2-44-7	f__UBA8517	g__RBG-13-46-13	s__	0.241791	0.00905719	0.00123849	0.0279436	0.00162217	0.339343	0.103499	0.844953	1098925	50.7042	8.4507
H14-bin005_1	d__Bacteria	p__Patescibacteria	c__Paceibacteria	o__Paceibacterales	f__Staskawiczbacteraceae	g__	s__	0.380453	0.00313304	6.21978e-05	0.00055034	0.000557633	0.376533	0.126882	1.00521	607914	56.338	1.40845
H14-bin007_1	d__Bacteria	p__Patescibacteria	c__Paceibacteria	o__GWC2-36-17_A	f__UBA10092	g__UBA10092	s__	1.43306	0.0222616	0.00386902	0.0175354	0.0123591	0.782636	0.37862	1.86395	722279	63.3803	0
H14-bin010_1	d__Bacteria	p__Patescibacteria	c__Microgenomatia	o__Levybacterales	f__UBA12049	g__	s__	1.93786	9.15235e-05	2.14324e-05	0.00165572	0.000304419	0.270327	0.368376	0.600376	1569968	87.3239	0
H14-bin011_1	d__Archaea	p__Crenarchaeota	c__Nitrososphaeria	o__Nitrososphaerales	f__Nitrosopumilaceae	g__	s__	1.34847	0.0723062	0.0165926	0.0157041	0.138476	0.231485	0.303839	0.405194	896434	82.8947	1.31579
H14-bin012_1	d__Bacteria	p__Proteobacteria	c__Gammaproteobacteria	o__Pseudomonadales	f__Pseudohongiellaceae	g__UBA5078	s__	0.84134	0.000554147	0.00550322	0.0910211	0.0210684	0.114485	0.178995	0.248728	2382533	54.9296	0
H14-bin013_1	d__Bacteria	p__Patescibacteria	c__Paceibacteria	o__UBA9983_A	f__Zambryskibacteraceae	g__UBA5004	s__	1.03422	0.00225236	0.000105961	0.0016448	0.000450579	0.376659	0.235889	0.839734	487853	53.5211	0
H14-bin014_1	d__Bacteria	p__Proteobacteria	c__Alphaproteobacteria	o__Caulobacterales	f__Caulobacteraceae	g__Phenylobacterium	s__Phenylobacterium sp001429025	13.5126	0.0185402	0.0421108	0.339534	0.0324969	2.0964	2.67362	4.33336	4725235	92.9577	1.40845
H14-bin017_1	d__Bacteria	p__Nitrospirota	c__Nitrospiria	o__2-01-FULL-66-17	f__	g__	s__	1.65163	0.0506615	0.000446439	0.000372244	0.0440978	0.209519	0.326122	0.491358	1396926	73.2394	1.40845
H14-bin022_1	d__Bacteria	p__Patescibacteria	c__Paceibacteria	o__2-02-FULL-40-12	f__GWA2-44-9	g__2-01-FULL-43-22	s__	1.43083	0.0128606	0.00106754	0.0210376	0.00733267	0.444842	0.319662	0.923163	642562	71.831	1.40845
H14-bin023_1	d__Bacteria	p__Patescibacteria	c__Paceibacteria	o__UBA6257	f__MFKM01	g__	s__	1.46703	0.034176	0.000465732	0.00077935	0.00690567	0.340542	0.308316	0.66972	533116	59.1549	0
H14-bin024_1	d__Bacteria	p__Patescibacteria	c__Paceibacteria	o__2-02-FULL-40-12	f__	g__	s__	0.816703	0.147135	0.0182419	0.00921778	0.110918	0.266544	0.228127	0.358949	516924	57.7465	4.22535
H14-bin025_1	d__Bacteria	p__Patescibacteria	c__Paceibacteria	o__Ryanbacterales	f__2-02-FULL-48-12	g__02-FULL-45-17b	s__	1.11067	0.0577678	0.0198357	0.00304738	0.0581403	0.307848	0.259552	0.539917	508495	57.7465	0
H14-bin026_1	d__Bacteria	p__Patescibacteria	c__Paceibacteria	o__WO2-41-13	f__H02-45-28	g__HO2-45-28	s__	1.36719	0.00462855	9.29753e-05	0.00347752	0.000905357	0.286555	0.277141	0.569351	694658	71.831	0
H14-bin027_1	d__Bacteria	p__Patescibacteria	c__Microgenomatia	o__Levybacterales	f__UBA12049	g__	s__	1.38302	0.00393065	0.000140705	0.0133216	0.000853164	0.303276	0.28409	0.600309	819306	73.2394	0
H14-bin028_1	d__Bacteria	p__Patescibacteria	c__Paceibacteria	o__2-02-FULL-40-12	f__GWA2-44-9	g__	s__	1.3352	0.049951	0.00686105	0.00382339	0.0298456	0.297087	0.287128	0.553978	468256	53.5211	0
H14-bin029_1	d__Bacteria	p__Patescibacteria	c__ABY1	o__SG8-24	f__GWA2-47-26	g__	s__	1.54163	0.0177017	0.00175491	0.00313237	0.0132074	0.245355	0.303798	0.501937	952815	69.0141	0
H14-bin032_1	d__Bacteria	p__Methylomirabilota	c__Methylomirabilia	o__Rokubacteriales	f__GWA2-73-35	g__CSP1-6	s__	0.95485	0.0646139	0.017918	0.136278	0.166937	0.164756	0.250892	0.279549	921336	52.1127	0
H14-bin036_1	d__Bacteria	p__Chloroflexota	c__Dehalococcoidia	o__	f__	g__	s__	0.59767	0.000927275	0.000925168	0.0183044	0.00114855	0.069497	0.114745	0.177475	953082	53.5211	1.40845
H14-bin037_1	d__Bacteria	p__Verrucomicrobiota_A	c__Chlamydiia	o__Parachlamydiales	f__Ga0074140	g__PSRO01	s__	0.889853	0.00011696	2.82675e-05	0.0100661	0.000123063	0.100044	0.166705	0.264835	1257396	61.9718	0
H14-bin039_1	d__Bacteria	p__Proteobacteria	c__Gammaproteobacteria	o__Burkholderiales	f__SG8-39	g__RBG-16-66-20	s__	2.62175	0.0702153	0.0180364	0.0389185	0.125846	0.360997	0.539293	0.782603	1666150	53.5211	4.22535
H14-bin040_1	d__Bacteria	p__Patescibacteria	c__Paceibacteria	o__UBA9983_A	f__UBA2163	g__C7867-001	s__	1.05418	0.0458603	0.0082898	0.711041	0.00471185	0.434899	0.376497	0.530739	544279	61.9718	0
H14-bin041_1	d__Bacteria	p__Nitrospirota	c__Nitrospiria	o__Nitrospirales	f__	g__	s__	1.80566	1.22342	0.0519857	0.00462347	1.08211	0.458892	0.771114	0.632047	1459779	64.7887	0
H14-bin042_1	d__Bacteria	p__Patescibacteria	c__Paceibacteria	o__2-02-FULL-40-12	f__	g__	s__	0.709522	0.116436	0.0104101	0.00954252	0.068645	0.202203	0.186127	0.286995	418797	57.7465	0
H14-bin043_1	d__Bacteria	p__Patescibacteria	c__Paceibacteria	o__Paceibacterales	f__	g__	s__	1.59696	0.00871881	0.00663134	0.105661	0.00584788	0.329828	0.342274	0.596552	706169	78.8732	0
H14-bin046	d__Bacteria	p__Methylomirabilota	c__Methylomirabilia	o__Rokubacteriales	f__GWA2-73-35	g__	s__	1.34266	0.0868107	0.0161761	0.0644157	0.228009	0.232542	0.328436	0.407431	2709420	73.2394	1.40845
H14-bin049_1	d__Bacteria	p__Actinobacteriota	c__Acidimicrobiia	o__IMCC26256	f__	g__	s__	0.814885	0.00476893	0.000519188	0.000211181	0.0330866	0.0920901	0.157593	0.241842	1593275	53.5211	0
H14-bin050_1	d__Bacteria	p__Chloroflexota	c__Dehalococcoidia	o__	f__	g__	s__	0.726215	0.00146327	0.00125563	0.0278418	0.00191264	0.0842991	0.140498	0.215433	1917426	53.5211	1.40845
H14-bin051_1	d__Bacteria	p__Chloroflexota	c__Dehalococcoidia	o__JdFR-54	f__	g__	s__	0.857925	0.00191952	0.0142497	0.150166	0.0288005	0.117625	0.195114	0.252076	1481237	56.338	0
H14-bin052	d__Bacteria	p__Margulisbacteria	c__WOR-1	o__	f__	g__	s__	0.758557	0.00165175	5.53522e-05	0.00249116	0.000255657	0.106503	0.144919	0.235196	1361639	61.9718	2.8169
H14-bin053_1	d__Bacteria	p__GWC2-55-46	c__GWC2-55-46	o__GWC2-55-46	f__UBA9637	g__	s__	2.29103	0.19553	0.00796689	0.0111133	0.312664	0.383788	0.533682	0.702107	1479340	90.1408	0
H14-bin054_1	d__Bacteria	p__Nitrospirota	c__Nitrospiria	o__	f__	g__	s__	1.48753	0.0462079	0.000398039	0.000467	0.0418461	0.190384	0.294472	0.442843	1239214	64.7887	0
H14-bin056_1	d__Archaea	p__Nanoarchaeota	c__Nanoarchaeia	o__Woesearchaeales	f__GW2011-AR4	g__GCA-2688775	s__	3.59856	0.0225509	0.00588024	0.00823281	0.0408355	0.447582	0.687274	1.07568	1683760	84.2105	2.63158
H14-bin061_1	d__Bacteria	p__Chloroflexota	c__Dehalococcoidia	o__	f__	g__	s__	0.739202	0.00125611	0.00123017	0.0285331	0.00167244	0.0850562	0.142825	0.219321	1380473	56.338	1.40845
H14-bin062_1	d__Bacteria	p__UBA8248	c__UBA8248	o__UBA8248	f__UBA8248	g__2-12-FULL-69-37	s__	1.11445	0.00400567	0.00316954	0.0459422	0.0176644	0.15775	0.22383	0.33879	3415909	78.8732	2.8169
H14-bin063_1	d__Archaea	p__Nanoarchaeota	c__Nanoarchaeia	o__Woesearchaeales	f__UBA10107	g__	s__	0.650226	0.0151608	0.00269835	0.00220704	0.0401744	0.0986204	0.134848	0.200359	1082187	52.6316	0
H32-bin001_1	d__Bacteria	p__Proteobacteria	c__Gammaproteobacteria	o__Thiohalomonadales	f__SG8-11	g__	s__	0.00406175	0.301971	0.000666219	0.000503277	0.00101508	0.0345164	0.0571223	0.0896718	3304039	97.1831	0
H32-bin002_1	d__Archaea	p__Iainarchaeota	c__Iainarchaeia	o__Iainarchaeales	f__Iainarchaeaceae	g__Iainarchaeum	s__	0.00123748	0.377245	0.00285046	0.00060606	0.0135133	0.0466842	0.0736895	0.111004	986348	85.5263	1.31579
H32-bin003	d__Bacteria	p__Patescibacteria	c__Paceibacteria	o__UBA9983	f__	g__	s__	0.00823677	0.32417	0.0021758	0.0264592	0.00629603	0.0480095	0.0692246	0.0933217	636021	76.0563	1.40845
H32-bin004	d__Bacteria	p__Patescibacteria	c__Gracilibacteria	o__UBA1369	f__UM-FILTER-53-11	g__	s__	0.00806034	0.269244	0.012255	0.012347	0.0243594	0.0350067	0.0602121	0.0783584	1383857	83.0986	0
H32-bin005_1	d__Bacteria	p__Nitrospirota	c__Thermodesulfovibrionia	o__	f__	g__	s__	0.00561555	0.300197	0.0228611	0.0134451	0.34303	0.0712999	0.126075	0.125726	2013754	85.9155	0
H32-bin006_1	d__Bacteria	p__Patescibacteria	c__Paceibacteria	o__UBA9983_A	f__UBA1539	g__	s__	0.00872222	0.270391	0.0181102	0.00339581	0.0304858	0.0943253	0.0709051	0.139141	649881	63.3803	0
H32-bin007_1	d__Bacteria	p__Patescibacteria	c__ABY1	o__UBA9570	f__	g__	s__	0.00357516	0.188102	0.00146901	0.00352213	0.0133302	0.0219533	0.0386586	0.055497	952874	74.6479	0
H32-bin008_1	d__Bacteria	p__Proteobacteria	c__Gammaproteobacteria	o__Burkholderiales	f__Burkholderiaceae	g__Delftia	s__Delftia tsuruhatensis	0.194	0.203262	0.00986061	0.0878117	0.0131155	0.244984	0.125506	0.260694	6501554	83.0986	1.40845
H32-bin009_1	d__Bacteria	p__Patescibacteria	c__Paceibacteria	o__UBA6257	f__UBA9933	g__	s__	0.0337382	4.59812	0.00753049	0.00857082	0.049567	0.744908	0.907072	1.41586	441327	69.0141	0
H32-bin010	d__Archaea	p__Nanoarchaeota	c__Nanoarchaeia	o__Pacearchaeales	f__GW2011-AR1	g__ASMP01	s__	0.0642484	0.27839	0.0125712	0.218684	0.014894	0.232602	0.136898	0.272969	649515	52.6316	2.63158
H32-bin011_1	d__Bacteria	p__Proteobacteria	c__Gammaproteobacteria	o__Pseudomonadales	f__Moraxellaceae	g__Perlucidibaca	s__	0.230899	2.11908	0.00200967	0.0389738	0.00449115	0.269532	0.444164	0.624702	2875157	100	0
H32-bin012_1	d__Archaea	p__Crenarchaeota	c__Nitrososphaeria	o__Nitrososphaerales	f__Nitrosopumilaceae	g__Nitrosoarchaeum	s__	0.306618	0.412253	0.697567	0.217867	0.518139	0.247734	0.40003	0.220491	580933	67.1053	0
H32-bin015_1	d__Bacteria	p__Proteobacteria	c__Gammaproteobacteria	o__Burkholderiales	f__Burkholderiaceae	g__Aquabacterium	s__	0.552389	1.11836	0.0100752	0.110162	0.00763565	0.19561	0.332372	0.345959	3462045	94.3662	1.40845
H32-bin016_1	d__Bacteria	p__Bacteroidota	c__UBA10030	o__UBA10030	f__UBA8401	g__	s__	0.0991019	1.35944	0.00311892	0.0104886	9.54743	1.27175	2.04855	2.8043	586453	54.9296	0
H32-bin018_1	d__Bacteria	p__Patescibacteria	c__Paceibacteria	o__UBA9983_A	f__UBA2163	g__C7867-001	s__	0.0238197	1.41331	0.0339541	0.0162051	0.0552461	0.203425	0.290994	0.406382	813663	64.7887	0
H32-bin019_1	d__Bacteria	p__Patescibacteria	c__Paceibacteria_A	o__Moranbacterales	f__UBA1568	g__UBA1568	s__	0.00315038	1.10985	0.00116803	0.0012308	0.00543466	0.114256	0.205849	0.331893	759386	83.0986	1.40845
H32-bin021_1	d__Archaea	p__Nanoarchaeota	c__Nanoarchaeia	o__Pacearchaeales	f__	g__	s__	0.00490756	0.365821	0.00354912	0.0119356	0.0186802	0.0563353	0.0768714	0.10549	986349	59.2105	1.31579
H32-bin022_1	d__Bacteria	p__Patescibacteria	c__Microgenomatia	o__UBA1400	f__	g__	s__	0.00111906	0.249853	0.0230326	0.00698968	0.344109	0.0664478	0.115258	0.117444	417576	56.338	0
H32-bin025_1	d__Bacteria	p__Patescibacteria	c__Saccharimonadia	o__Saccharimonadales	f__UBA4665	g__	s__	0.00807692	0.3625	0.000288323	0.00801456	0.00164213	0.0425672	0.0705149	0.106977	902484	80.2817	2.8169
H32-bin027_1	d__Bacteria	p__Nitrospinota	c__UBA9942	o__UBA9942	f__UBA9942	g__PLOWO2-12-39-15	s__	0.000611161	0.120999	0.00117508	0.000224982	0.144654	0.0273816	0.0491743	0.053002	1495734	66.1972	0
H32-bin030_1	d__Bacteria	p__Nitrospirota	c__Nitrospiria	o__Nitrospirales	f__Nitrospiraceae	g__Nitrospira_D	s__	0.00819663	0.785794	0.234185	0.0107246	0.042197	0.147421	0.204753	0.243777	351271	53.5211	0
H32-bin031_1	d__Bacteria	p__Nitrospirota	c__Nitrospiria	o__Nitrospirales	f__	g__	s__	0.671943	1.03346	0.0637061	0.00668394	0.81561	0.282197	0.478934	0.379614	1371664	69.0141	0
H32-bin032_1	d__Bacteria	p__Patescibacteria	c__Paceibacteria	o__UBA9983_A	f__UBA11359_A	g__2-02-FULL-44-35	s__	0.0563061	0.160565	0.0418034	0.232262	0.0793952	0.148248	0.119763	0.120587	537694	74.6479	0
H32-bin033_1	d__Archaea	p__Thermoplasmatota	c__E2	o__UBA9212	f__GCA-002838935	g__	s__	0.0559354	1.62781	0.00882094	0.0190497	0.00495155	0.199224	0.319299	0.482395	1699269	96.0526	0
H32-bin034_1	d__Bacteria	p__Nitrospirota	c__Nitrospiria	o__Nitrospirales	f__Nitrospiraceae	g__2-02-FULL-62-14	s__	0.228839	0.162696	0.00380858	0.00165517	0.0208159	0.0740246	0.0819733	0.1057	1361953	60.5634	0
H32-bin035	d__Bacteria	p__Patescibacteria	c__Paceibacteria	o__UBA9983_A	f__	g__	s__	1.0272	1.35103	0.00288241	0.0013563	0.027582	0.330899	0.456824	0.496538	754830	63.3803	2.8169
H32-bin038_1	d__Archaea	p__Thermoplasmatota	c__E2	o__UBA9212	f__	g__	s__	0.0347747	0.87629	0.000408848	0.00125157	0.000487391	0.103086	0.169383	0.260087	2068438	90.7895	0
H32-bin039_1	d__Bacteria	p__Proteobacteria	c__Gammaproteobacteria	o__Nevskiales	f__Nevskiaceae	g__	s__	0.0161699	0.79365	0.0033811	0.00248293	0.00303156	0.0887084	0.151237	0.235767	2522519	95.7746	0
H32-bin043_1	d__Bacteria	p__Patescibacteria	c__Paceibacteria	o__UBA9983_A	f__	g__	s__	0.00345612	0.165223	0.009611	0.00192074	0.0678802	0.117635	0.0609543	0.227732	469358	59.1549	1.40845
H32-bin045_1	d__Bacteria	p__Patescibacteria	c__Paceibacteria	o__UBA6257	f__MFKM01	g__MFKM01	s__	0.0152769	0.270828	0.0640686	0.00961882	0.0515334	0.146689	0.0930024	0.219156	604402	71.831	0
H32-bin046_1	d__Bacteria	p__Proteobacteria	c__Gammaproteobacteria	o__Burkholderiales	f__SG8-41	g__	s__	0.0432846	0.28827	0.0107883	0.0124604	0.0240906	0.0413963	0.0700483	0.0835182	3348884	83.0986	2.8169
H32-bin048_1	d__Bacteria	p__Eisenbacteria	c__RBG-16-71-46	o__RBG-16-71-46	f__RBG-16-71-46	g__	s__	0.119423	0.250653	0.0270061	0.154968	0.0746222	0.0662883	0.115494	0.0803502	2267608	53.5211	0
H32-bin049_1	d__Bacteria	p__Patescibacteria	c__Paceibacteria	o__UBA9983_A	f__UBA9973	g__UBA9973	s__	0.00273947	0.282667	0.00573899	0.00113558	0.00361333	0.034848	0.0551237	0.0828572	605971	61.9718	0
H32-bin050_1	d__Bacteria	p__Patescibacteria	c__Saccharimonadia	o__Saccharimonadales	f__UBA4665	g__	s__	0.0149483	0.542851	0.000687386	0.00450628	0.0113464	0.0650735	0.106569	0.159708	942914	87.3239	2.8169
H32-bin051_1	d__Bacteria	p__Patescibacteria	c__Paceibacteria	o__2-02-FULL-40-12	f__	g__	s__	0.0385391	0.255054	0.00814772	0.015298	0.0468482	0.0622991	0.0710311	0.0764852	520072	57.7465	0
H32-bin052_1	d__Bacteria	p__Patescibacteria	c__Microgenomatia	o__UBA1406	f__GWC2-37-13	g__GWC2-37-13	s__	0.00603572	0.197456	0.272151	0.012125	0.0298991	0.071592	0.0982099	0.0919697	571355	59.1549	0
H32-bin053_1	d__Bacteria	p__Patescibacteria	c__Paceibacteria	o__GWC2-36-17	f__M10-OD1-4	g__M10-OD1-4	s__	0.0045773	0.648017	0.00353335	0.00166422	0.0412339	0.0740423	0.128845	0.191721	692188	77.4648	0
H32-bin054_1	d__Archaea	p__Nanoarchaeota	c__Nanoarchaeia	o__Woesearchaeales	f__GW2011-AR9	g__UBA10204	s__	0.00366926	0.594958	0.0300173	0.00562106	0.0930045	0.0965114	0.137297	0.170391	497408	60.5263	1.31579
H32-bin055_1	d__Archaea	p__Nanoarchaeota	c__Nanoarchaeia	o__SCGC-AAA011-G17	f__UBA489	g__	s__	0.00253611	0.443446	0.0013534	0.00246611	0.0380802	0.0601987	0.0913468	0.12933	779494	61.8421	0
H32-bin056_1	d__Bacteria	p__Nitrospirota	c__Nitrospiria	o__HDB-SIOI813	f__HDB-SIOI813	g__RBG-16-43-11	s__RBG-16-43-11 sp001805165	0.00561937	0.162463	0.00752143	0.0054657	0.070701	0.0262632	0.0463389	0.0496663	1325170	71.831	1.40845
H32-bin058_1	d__Bacteria	p__Patescibacteria	c__Microgenomatia	o__UBA1406	f__GWC2-37-13	g__GWC2-37-13	s__	0.00516895	0.160211	0.109561	0.106852	0.0306819	0.0551746	0.0779415	0.0501121	1148287	64.7887	1.40845
H32-bin060_1	d__Bacteria	p__Actinobacteriota	c__Acidimicrobiia	o__Microtrichales	f__Ilumatobacteraceae	g__	s__	0.00951795	0.265675	0.0453291	0.00270732	0.0181775	0.0358149	0.0628702	0.0776731	1298997	67.6056	0
H32-bin062_1	d__Bacteria	p__Patescibacteria	c__Gracilibacteria	o__Peribacterales	f__	g__	s__	0.028335	0.165566	0.00619377	0.0013193	0.0846014	0.0327257	0.0531236	0.0505804	1053849	64.7887	0
H32-bin065_1	d__Bacteria	p__Nitrospinota	c__UBA9942	o__UBA9942	f__UBA9942	g__	s__	0.000822953	0.255473	0.000913305	0.000144145	0.0865348	0.0354699	0.0632263	0.0776172	2380550	90.1408	2.8169
H32-bin066_1	d__Bacteria	p__Proteobacteria	c__Gammaproteobacteria	o__Ga0077554	f__Ga007554	g__	s__	0.00681893	0.15179	0.000762398	0.00229893	0.0090656	0.0195858	0.0317203	0.0445962	2395710	85.9155	0
H32-bin068_1	d__Archaea	p__Crenarchaeota	c__Nitrososphaeria	o__Nitrososphaerales	f__Nitrosopumilaceae	g__CSP1-1	s__	0.897858	0.0858805	0.0149219	0.013626	0.119371	0.166649	0.216384	0.268936	948916	65.7895	2.63158
H32-bin070_1	d__Bacteria	p__Actinobacteriota	c__Acidimicrobiia	o__Microtrichales	f__Ilumatobacteraceae	g__	s__	0.011943	0.29504	0.0377651	0.00472658	0.0207814	0.0390613	0.0682196	0.0860096	1165968	67.6056	0
H32-bin072_1	d__Bacteria	p__Patescibacteria	c__Paceibacteria	o__Sungbacterales	f__	g__	s__	0.353861	0.181756	0.0147951	0.00412313	0.0979154	0.114959	0.127902	0.12606	307738	56.338	0
H32-bin079_1	d__Bacteria	p__Nitrospirota	c__Nitrospiria	o__2-01-FULL-66-17	f__	g__	s__	0.000948897	0.646888	0.000162582	0.00025838	0.000792279	0.0711129	0.120027	0.192802	1007061	64.7887	4.22535
H32-bin080_1	d__Bacteria	p__Nitrospirota	c__Nitrospiria	o__2-01-FULL-66-17	f__	g__	s__	0.00158612	0.559209	0.000700431	0.000821045	0.00236318	0.0581217	0.1038	0.167095	1364001	64.7887	0
H32-bin081_1	d__Bacteria	p__Patescibacteria	c__UBA1384	o__2-12-FULL-50-11	f__2-12-FULL-50-11	g__	s__	0.00158576	0.510821	0.000647783	0.00622882	0.0147745	0.0670547	0.100186	0.150507	578417	73.2394	0
H32-bin084_1	d__Archaea	p__Nanoarchaeota	c__Nanoarchaeia	o__Pacearchaeales	f__UBA73	g__ARS50	s__	0.00443533	0.426044	0.0355264	0.00923399	0.0345983	0.0592085	0.0948411	0.123024	684767	55.2632	0
H32-bin086_1	d__Bacteria	p__Chloroflexota_A	c__Ellin6529	o__P2-11E	f__P2-11E	g__	s__	0.163996	0.108801	0.0239781	0.108843	0.0249235	0.0476527	0.0796992	0.0554734	1284213	66.1972	0
H32-bin088_1	d__Bacteria	p__Patescibacteria	c__ABY1	o__UBA2169	f__UBA2169	g__2-02-FULL-48-11-A	s__	0.00711946	0.297805	0.00821249	0.00561757	0.069745	0.0491619	0.0729436	0.0872727	543830	59.1549	0
H32-bin092_1	d__Bacteria	p__Patescibacteria	c__ABY1	o__UBA10025	f__PEXW01	g__PEXW01	s__	0.00259304	0.316224	0.000539241	0.000546644	0.00227148	0.0332862	0.0592434	0.0943301	850625	84.507	0
H32-bin094_1	d__Bacteria	p__GWC2-55-46	c__GWC2-55-46	o__GWC2-55-46	f__	g__	s__	7.44612e-05	0.170263	4.85818e-05	0.00015267	0.000123387	0.0172975	0.0313266	0.0509929	1406215	69.0141	1.40845
H32-bin095_1	d__Bacteria	p__Nitrospirota	c__Nitrospiria	o__Nitrospirales	f__Nitrospiraceae	g__Nitrospira_D	s__	0.00851131	0.863992	0.273524	0.0117056	0.0532541	0.16051	0.228583	0.265097	993223	56.338	1.40845
H32-bin096_1	d__Bacteria	p__Nitrospirota	c__Nitrospiria	o__Nitrospirales	f__	g__	s__	0.728377	1.18323	0.0849787	0.00959709	0.925714	0.319152	0.541842	0.428629	1475868	76.0563	0
H32-bin097_1	d__Archaea	p__Crenarchaeota	c__Nitrososphaeria	o__Nitrososphaerales	f__Nitrosopumilaceae	g__Nitrosoarchaeum	s__	0.259319	0.366026	0.536923	0.164433	0.463929	0.207271	0.332983	0.181351	454998	53.9474	0
H32-bin099_1	d__Archaea	p__Nanoarchaeota	c__Nanoarchaeia	o__Pacearchaeales	f__UBA73	g__UBA73	s__	0.750073	0.398779	0.0501935	0.0557362	0.107879	0.170987	0.255608	0.229272	850789	60.5263	0
H32-bin100	d__Bacteria	p__Patescibacteria	c__Paceibacteria	o__UBA6257	f__UBA9933	g__	s__	0.00477237	0.153528	0.917515	0.0284759	0.189423	0.720173	0.335648	1.07834	341304	56.338	0
H32-bin101_1	d__Archaea	p__Nanoarchaeota	c__Nanoarchaeia	o__Pacearchaeales	f__GW2011-AR1	g__	s__	0.00417759	0.440123	0.00101336	0.00207797	0.0477382	0.124103	0.103206	0.226768	726871	55.2632	0
H32-bin102_1	d__Bacteria	p__Gemmatimonadota	c__Gemmatimonadetes	o__Gemmatimonadales	f__GWC2-71-9	g__	s__	0.0961407	0.235052	0.0318895	0.0307404	0.173102	0.0664602	0.105564	0.076484	2705529	85.9155	0
H32-bin103_1	d__Bacteria	p__Nitrospirota	c__Nitrospiria	o__2-01-FULL-66-17	f__	g__	s__	0.00234166	0.768133	0.000564362	0.00116357	0.00158584	0.0855597	0.143225	0.228796	1055915	60.5634	0
H32-bin106_1	d__Bacteria	p__Proteobacteria	c__Gammaproteobacteria	o__Burkholderiales	f__SG8-39	g__2-12-FULL-64-23	s__	0.141132	0.21479	0.158196	0.44877	0.094097	0.113711	0.195116	0.132459	1567495	57.7465	1.40845
H32-bin107_1	d__Bacteria	p__Patescibacteria	c__Paceibacteria	o__UBA6257	f__02-FULL-45-10c	g__	s__	0.0395326	0.160245	0.141798	0.00819422	0.0582315	0.062416	0.078403	0.0485017	712656	57.7465	1.40845
H32-bin108_1	d__Bacteria	p__Patescibacteria	c__Paceibacteria	o__UBA9983_A	f__UBA11359	g__UBA6065	s__	0.020954	0.156162	0.00514867	0.0856904	0.00795068	0.070016	0.0576536	0.0866469	493773	74.6479	0
H32-bin109_1	d__Bacteria	p__Gemmatimonadota	c__Gemmatimonadetes	o__Gemmatimonadales	f__GWC2-71-9	g__SZUA-320	s__	0.00363461	0.120798	0.0513528	0.00152951	0.0545943	0.0254535	0.0428939	0.037567	1982313	69.0141	0
H32-bin110_1	d__Bacteria	p__Eisenbacteria	c__RBG-16-71-46	o__RBG-16-71-46	f__RBG-16-71-46	g__	s__	0.144903	0.261714	0.0288288	0.158624	0.0772174	0.0712342	0.123754	0.084944	1503964	59.1549	0
H32-bin111_1	d__Bacteria	p__Patescibacteria	c__ABY1	o__UBA1544	f__	g__	s__	0.00240075	0.384171	0.000507524	0.00134031	0.00570378	0.0403308	0.072409	0.114642	1091771	81.6901	1.40845
H32-bin112_1	d__Bacteria	p__Proteobacteria	c__Alphaproteobacteria	o__Rhodospirillales_A	f__2-12-FULL-67-15	g__2-12-FULL-67-15	s__	0.215784	0.152359	0.0660414	0.201032	0.0877167	0.087661	0.135099	0.0752172	1593266	54.9296	1.40845
H32-bin113_1	d__Bacteria	p__Planctomycetota	c__Brocadiae	o__Brocadiales	f__Brocadiaceae	g__2-12-FULL-39-13	s__2-12-FULL-39-13 sp001824485	0.0633104	0.108541	0.0575176	0.00858554	0.109345	0.0390644	0.064394	0.0412389	1328034	61.9718	0
H32-bin115_1	d__Bacteria	p__Nitrospirota	c__Nitrospiria	o__2-01-FULL-66-17	f__	g__	s__	0.00518661	0.431502	0.00402992	0.000333283	0.00663248	0.046056	0.0822901	0.128524	1684599	95.7746	0
H32-bin116_1	d__Bacteria	p__Patescibacteria	c__ABY1	o__UBA11705	f__UBA11705	g__	s__	0.173473	0.277842	0.00841598	0.016164	0.123078	0.0707895	0.111627	0.0895319	977108	71.831	0
H32-bin117_1	d__Bacteria	p__Patescibacteria	c__ABY1	o__UBA2169	f__UBA2169	g__CG10-46-32	s__	0.0891902	0.333384	0.00725698	0.0107437	0.0206232	0.0556325	0.0861385	0.0966779	436071	64.7887	1.40845
H32-bin118_1	d__Bacteria	p__Patescibacteria	c__Paceibacteria	o__UBA6257	f__	g__	s__	0.00216207	0.283891	0.000275714	0.000925102	0.0211819	0.0888762	0.0662187	0.151326	625089	64.7887	0
H32-bin119_1	d__Bacteria	p__Patescibacteria	c__Paceibacteria	o__UBA9983_A	f__UBA2163	g__C7867-001	s__	0.0027938	0.0977101	0.000460919	0.000974106	0.0207144	0.0236928	0.024391	0.0330095	387405	50.7042	0
H32-bin121_1	d__Bacteria	p__Methylomirabilota	c__Methylomirabilia	o__Rokubacteriales	f__GWA2-73-35	g__UBA12499	s__UBA12499 sp001788395	0.0507414	0.20441	0.0577014	0.0386272	0.211084	0.0598817	0.103741	0.0765205	3845436	94.3662	2.8169
H32-bin122_1	d__Bacteria	p__Nitrospirota	c__Nitrospiria	o__HDB-SIOI813	f__HDB-SIOI813	g__RBG-16-43-11	s__RBG-16-43-11 sp001805165	0.0046164	0.171468	0.00825821	0.00564409	0.0770021	0.0276595	0.049108	0.0527616	1355893	60.5634	0
H32-bin123_1	d__Bacteria	p__Patescibacteria	c__Microgenomatia	o__UBA10105	f__UBA927	g__	s__	0.00365118	0.12672	0.00677067	0.0814697	0.0321778	0.0517311	0.0504201	0.0419334	782900	54.9296	0
H32-bin126_1	d__Bacteria	p__Verrucomicrobiota	c__Verrucomicrobiae	o__Pedosphaerales	f__Pedosphaeraceae	g__	s__	0.00784488	0.160778	0.0793429	0.00945627	0.0601362	0.0333972	0.0584925	0.0498911	1595114	63.3803	2.8169
H32-bin128_1	d__Bacteria	p__Nitrospirota	c__Nitrospiria	o__9FT-COMBO-42-15	f__9FT-COMBO-42-15	g__9FT-COMBO-42-15	s__	0.00726102	0.410299	0.0160336	0.00392613	0.314681	0.11065	0.143809	0.141417	2300239	91.5493	0
H32-bin129_1	d__Archaea	p__Nanoarchaeota	c__Nanoarchaeia	o__Pacearchaeales	f__	g__	s__	0.00499594	0.174827	0.00233371	0.00716504	0.0514916	0.034486	0.0458832	0.0525013	908692	50	0
H32-bin130_1	d__Archaea	p__Hydrothermarchaeota	c__Hydrothermarchaeia	o__Hydrothermarchaeales	f__	g__	s__	0.376718	0.164494	0.0242922	0.0547809	0.00969773	0.0732804	0.117211	0.113421	1488392	86.8421	0
H32-bin131_1	d__Bacteria	p__Patescibacteria	c__ABY1	o__SG8-24	f__GWA2-47-26	g__	s__	0.00438099	0.396918	0.00923779	0.00228501	0.0268033	0.047775	0.0812334	0.116597	795295	81.6901	0
H32-bin132_1	d__Bacteria	p__Patescibacteria	c__ABY1	o__UBA10025	f__PEXW01	g__PEXW01	s__	0.00110381	0.0692793	0.00978064	0.00258646	0.00417732	0.0250765	0.0186673	0.0394833	775455	67.6056	0
H32-bin133_1	d__Bacteria	p__Patescibacteria	c__ABY1	o__Magasanikbacterales	f__UBA922	g__	s__	0.0161838	0.177245	0.00490822	0.00403928	0.0269563	0.0245736	0.0423176	0.0515366	1090794	53.5211	1.40845
H32-bin134_1	d__Bacteria	p__Patescibacteria	c__Gracilibacteria	o__UBA1369	f__	g__	s__	0.00161169	0.188335	0.0355351	0.0144737	0.0460838	0.0312865	0.0528877	0.0544182	1123569	78.8732	0
H32-bin138_1	d__Bacteria	p__Nitrospinota	c__UBA9942	o__UBA9942	f__UBA9942	g__UBA9942	s__	0.00143867	0.224582	0.00146039	0.000958841	0.09595	0.0345602	0.059825	0.0692556	2963777	90.1408	1.40845
H32-bin139_1	d__Bacteria	p__Myxococcota	c__Polyangia	o__Palsa-1104	f__	g__	s__	0.0698963	0.223946	0.00905846	0.00285977	0.0197535	0.0334383	0.0598254	0.0666306	3390575	83.0986	0
H32-bin140_1	d__Bacteria	p__Margulisbacteria	c__ZB3	o__	f__	g__	s__	0.000369071	0.258777	0.00749705	0.00023404	0.0343678	0.0307905	0.0553392	0.0766487	1031094	70.4225	0
H32-bin141_1	d__Bacteria	p__Elusimicrobiota	c__Elusimicrobia	o__	f__	g__	s__	0.000553681	0.121066	0.0541869	0.000923239	0.00487364	0.0241863	0.0342983	0.0382637	2027530	77.4648	0
H32-bin142_1	d__Bacteria	p__Patescibacteria	c__ABY1	o__SG8-24	f__2-12-FULL-60-25	g__SZUA-46	s__	0.0107297	0.163682	0.00163163	0.000765148	0.0184538	0.0204271	0.0359483	0.0480731	699340	63.3803	0
H32-bin143_1	d__Bacteria	p__CG2-30-53-67	c__CG2-30-53-67	o__CG2-30-53-67	f__CG2-30-53-67	g__CG2-30-53-67	s__	0.00276849	0.362455	0.00381956	0.0511011	0.0386113	0.0468875	0.0842738	0.106576	2956888	91.5493	1.40845
H32-bin144_1	d__Bacteria	p__Nitrospirota	c__Thermodesulfovibrionia	o__Thermodesulfovibrionales	f__UBA9159	g__	s__	0.000624131	0.192443	0.0332216	0.00210095	0.082805	0.0318917	0.0571811	0.0590327	2052474	91.5493	0
H32-bin145_1	d__Bacteria	p__Patescibacteria	c__ABY1	o__UBA10025	f__PEXW01	g__	s__	0.00206728	0.310629	0.00182094	0.127697	0.0165333	0.048511	0.084543	0.0947998	1091590	85.9155	0
H41-bin001_1	d__Bacteria	p__Bdellovibrionota	c__Bdellovibrionia	o__Bdellovibrionales	f__Bdellovibrionaceae	g__UBA5009	s__	0.010166	0.000594635	0.233051	0.00208463	0.00105847	0.0488966	0.0493085	0.0905001	3003295	94.3662	0
H41-bin002_1	d__Bacteria	p__Patescibacteria	c__Paceibacteria	o__UBA9983_A	f__UBA11359	g__C7867-002	s__	0.0100163	0.00502425	0.0458859	0.00559356	0.0565059	0.108659	0.0386141	0.184681	643359	74.6479	0
H41-bin003_1	d__Bacteria	p__Patescibacteria	c__Paceibacteria	o__UBA9983_A	f__UBA9988	g__	s__	0.0251508	0.00794858	0.205706	0.00576447	0.0121439	0.111902	0.0614361	0.210645	589918	73.2394	0
H41-bin004_1	d__Bacteria	p__Patescibacteria	c__Paceibacteria	o__2-02-FULL-40-12	f__	g__	s__	0.0254161	0.00530714	0.0275435	0.00704501	0.00649223	0.0557622	0.021261	0.113468	560224	73.2394	0
H41-bin005_1	d__Bacteria	p__Patescibacteria	c__Paceibacteria	o__UBA9983_A	f__UBA11359_A	g__	s__	0.00997162	0.000543626	0.106966	0.00455194	0.00248195	0.0628452	0.0312267	0.109714	794270	76.0563	1.40845
H41-bin006_1	d__Bacteria	p__Nitrospirota	c__Nitrospiria	o__Nitrospirales	f__Nitrospiraceae	g__Palsa-1315	s__	0.124559	0.0397713	7.07154	0.0642982	0.963931	0.893892	1.52633	2.07854	3777348	95.7746	0
H41-bin009_1	d__Bacteria	p__Patescibacteria	c__Paceibacteria	o__UBA9983_A	f__21-14-all-36-13	g__	s__	0.012556	0.000803014	0.15281	0.00325078	0.00135862	0.170375	0.0568588	0.432567	593410	78.8732	0
H41-bin010_1	d__Bacteria	p__Patescibacteria	c__Paceibacteria	o__UBA9983_A	f__UBA9973	g__UBA9973	s__	0.0609973	0.00417982	0.28421	0.0124883	0.00509348	0.121614	0.0814304	0.213532	654179	87.3239	1.40845
H41-bin011_1	d__Bacteria	p__Patescibacteria	c__Paceibacteria	o__UBA6257	f__WO2-44-18	g__2011-GWA2-47-8b	s__	0.00446268	0.00135556	0.0703432	0.000982869	0.0472698	0.041849	0.0277105	0.0541035	851357	67.6056	0
H41-bin012_1	d__Bacteria	p__Patescibacteria	c__Paceibacteria	o__UBA9983_A	f__Zambryskibacteraceae	g__UBA5004	s__	0.00361057	0.0014983	0.0221305	0.00126902	0.000588992	0.0343351	0.0105721	0.0793052	465047	69.0141	0
H41-bin014_1	d__Bacteria	p__Patescibacteria	c__Microgenomatia	o__UBA1400	f__MFAQ01	g__2-01-FULL-50-23	s__	0.00112593	0.110076	0.070134	0.159085	0.0104798	0.101538	0.0754064	0.125973	577808	66.1972	0
H41-bin015_1	d__Bacteria	p__Patescibacteria	c__Paceibacteria	o__UBA9983_A	f__UBA2163	g__C7867-001	s__	0.00866606	0.000575516	0.0755524	0.00179601	0.000745076	0.0514297	0.0231275	0.120684	703483	84.507	0
H41-bin016	d__Bacteria	p__Patescibacteria	c__Paceibacteria_A	o__Moranbacterales	f__UBA1568	g__UBA1568	s__	0.00363578	0.000121411	0.0488648	0.000349878	0	0.0169515	0.0116539	0.0347184	547910	50.7042	2.8169
H41-bin017_1	d__Bacteria	p__Patescibacteria	c__Paceibacteria	o__UBA9983_A	f__UBA1539	g__UBA1550	s__	0.00701722	0.0130787	0.262841	0.011592	0.00963244	0.088383	0.0654241	0.155446	799763	77.4648	0
H41-bin018_1	d__Bacteria	p__Bacteroidota	c__UBA10030	o__UBA10030	f__UBA10030	g__	s__	0.071496	0.00605776	0.00757558	0.00307392	0.0126034	0.167012	0.0446364	0.399	719447	50.7042	0
H41-bin019_1	d__Bacteria	p__Nitrospirota	c__Nitrospiria	o__Nitrospirales	f__Nitrospiraceae	g__Nitrospira_D	s__	0.00424463	0.188028	0.75428	0.0136701	0.0567018	0.121878	0.1898	0.219281	1301644	81.6901	0
H41-bin020_1	d__Bacteria	p__Patescibacteria	c__Paceibacteria	o__2-02-FULL-40-12	f__GWA2-44-9	g__2-01-FULL-41-21	s__	0.0192598	0.0754822	0.064588	0.420231	0.0268636	0.332738	0.156527	0.460556	578705	70.4225	0
H41-bin024_1	d__Bacteria	p__Nitrospirota	c__UBA9217	o__UBA9217	f__UBA9217	g__	s__	0.00388582	0.0357064	0.0673051	0.0121458	0.0221886	0.121389	0.0437701	0.264	3450293	94.3662	4.22535
H41-bin025_1	d__Bacteria	p__Patescibacteria	c__Paceibacteria	o__2-02-FULL-40-12	f__GWA2-44-9	g__	s__	0.0190556	0.001151	0.0134303	0.00322648	0.00692873	0.0400444	0.0139728	0.0548615	422812	63.3803	0
H41-bin026_1	d__Bacteria	p__Patescibacteria	c__Paceibacteria	o__2-02-FULL-40-12	f__GWA2-44-9	g__2-02-FULL-46-19	s__	0.0384978	0.0416348	0.0669581	0.0119383	0.0188295	0.133633	0.0519152	0.274233	647023	70.4225	1.40845
H41-bin027_1	d__Bacteria	p__Patescibacteria	c__Paceibacteria	o__UBA6257	f__UBA9933	g__	s__	0.00354064	0.0631951	0.0190108	0.00444056	0.0741564	0.181895	0.0577065	0.271041	392385	59.1549	0
H41-bin028_1	d__Bacteria	p__Patescibacteria	c__Paceibacteria	o__2-02-FULL-40-12	f__GWA2-44-9	g__2-01-FULL-41-21	s__	0.0238386	0.000223389	0.0098046	0.0018089	0.000390501	0.0293133	0.0108965	0.0473661	690527	69.0141	2.8169
H41-bin030_1	d__Bacteria	p__Patescibacteria	c__Paceibacteria	o__UBA9983_A	f__UBA2135	g__	s__	0.00429227	0.843372	0.0827476	0.0216936	0.0670967	0.146595	0.194299	0.239453	641819	63.3803	0
H41-bin031_1	d__Bacteria	p__Patescibacteria	c__Paceibacteria	o__UBA9983_A	f__UBA9973	g__UBA4124	s__	0.0449319	0.000342492	0.036979	0.000822546	0.000448869	0.0346967	0.0197036	0.044749	578508	66.1972	0
H41-bin033_1	d__Bacteria	p__Bacteroidota	c__Bacteroidia	o__Cytophagales	f__Cyclobacteriaceae	g__ELB16-189	s__	0.00398714	0.000194122	0.054439	0.0200285	0.00379134	0.0463893	0.0214716	0.0860206	4326142	90.1408	0
H41-bin034_1	d__Bacteria	p__Patescibacteria	c__Paceibacteria	o__UBA9983_A	f__UBA11359	g__C7867-002	s__	0.00212306	0.0151236	0.0350599	0.636072	0.00801446	0.207703	0.150683	0.399229	538574	54.9296	0
H41-bin036_1	d__Bacteria	p__Patescibacteria	c__Paceibacteria	o__UBA9983_A	f__UBA2163	g__UBA10103	s__	0.0289589	0.00241738	0.126447	0.015753	0.013299	0.0636377	0.0417522	0.0866212	904968	84.507	0
H41-bin037_1	d__Bacteria	p__Patescibacteria	c__Paceibacteria	o__UBA9983_A	f__UBA11359	g__PALSA-1337	s__	0.00148264	0.0002354	0.00670671	0.0137807	0.000110592	0.0212156	0.00725527	0.0352645	394027	60.5634	1.40845
H41-bin038_1	d__Bacteria	p__Patescibacteria	c__Paceibacteria	o__UBA9983_A	f__	g__	s__	0.008424	0.0641449	0.0452957	0.00307908	0.00374659	0.0514445	0.0293558	0.0982605	672210	80.2817	0
H41-bin040_1	d__Bacteria	p__Patescibacteria	c__Paceibacteria	o__	f__	g__	s__	0.000802743	0.0593424	0.199805	0.054624	0.0293662	0.0484306	0.0653952	0.0564994	450550	50.7042	0
H41-bin041_1	d__Bacteria	p__Patescibacteria	c__Microgenomatia	o__GWA2-44-7	f__UBA8517	g__	s__	0.000674528	0.000413904	0.00537886	0.000693457	0.000832829	0.0194194	0.00456883	0.0460011	751650	64.7887	2.8169
H41-bin042_1	d__Bacteria	p__Patescibacteria	c__Paceibacteria	o__UBA6257	f__2-01-FULL-56-20	g__	s__	0.00782709	0.0630065	0.0542876	0.000800822	0.0146127	0.045787	0.0310536	0.0594707	609858	73.2394	0
H41-bin044_1	d__Bacteria	p__Patescibacteria	c__Paceibacteria	o__UBA9983_A	f__UBA2163	g__OLB19	s__	0.015122	0.000758945	0.210577	0.00260648	0.000588381	0.0625316	0.0486974	0.118122	985780	87.3239	1.40845
H41-bin045_1	d__Bacteria	p__Patescibacteria	c__Microgenomatia	o__Levybacterales	f__UBA12049	g__	s__	0.00230199	0.00407636	0.042818	0.000826695	0.016781	0.0540436	0.0201413	0.0931676	1047892	81.6901	4.22535
H41-bin046_1	d__Bacteria	p__Patescibacteria	c__Microgenomatia	o__GWA2-44-7	f__UBA8517	g__	s__	0.00100382	0.00120758	0.0197168	0.00162759	0.00231223	0.0291945	0.00917708	0.0641787	842639	76.0563	0
H41-bin047_1	d__Bacteria	p__Patescibacteria	c__Paceibacteria	o__UBA6257	f__UBA9933	g__	s__	0.00196693	0.00122558	0.0565975	0.00139662	0.000792264	0.0430252	0.0175007	0.106632	558453	70.4225	0
H41-bin048_1	d__Bacteria	p__Spirochaetota	c__Brachyspirae	o__Brachyspirales	f__	g__	s__	0.00321739	0.000700228	0.0164089	0.00113821	0.00149164	0.0185473	0.00691729	0.0444301	5129657	97.1831	1.40845
H41-bin049_1	d__Bacteria	p__Patescibacteria	c__Paceibacteria	o__UBA6257	f__UBA9933	g__	s__	0.00762028	0.0208008	0.282358	0.160856	0.0191626	0.8168	0.217933	1.66653	582449	56.338	0
H41-bin050_1	d__Bacteria	p__Patescibacteria	c__Paceibacteria	o__UBA9983_A	f__UBA11359	g__C7867-002	s__	0.0125225	0.000140679	0.189595	0.00180032	0.000240331	0.222956	0.0712092	0.579128	671122	76.0563	0
H41-bin051_1	d__Archaea	p__Nanoarchaeota	c__Nanoarchaeia	o__Pacearchaeales	f__UBA73	g__1-14-0-10-34-76	s__	0.00435765	0.00504424	0.0860021	0.00225027	0.00236783	0.106655	0.0344461	0.264727	844273	60.5263	0
H41-bin052_1	d__Bacteria	p__Patescibacteria	c__Paceibacteria	o__UBA9983_A	f__UBA9973	g__UBA9973	s__	0.00466008	0.000846048	0.197154	0.00305643	0.00216045	0.137017	0.0574824	0.335112	544886	78.8732	0
H41-bin053_1	d__Archaea	p__Nanoarchaeota	c__Nanoarchaeia	o__Pacearchaeales	f__UBA73	g__1-14-0-10-34-76	s__	0.00249607	0.0026444	0.0527061	0.000634848	0.000574604	0.0871971	0.0243755	0.231384	782892	59.2105	0
H41-bin055_1	d__Bacteria	p__Patescibacteria	c__Paceibacteria	o__UBA9983_A	f__UBA11359	g__C7867-002	s__	0.00222195	3.1079e-06	0.0470416	0.000369536	1.02317e-05	0.0359165	0.0142605	0.0894197	787486	76.0563	0
H41-bin056_1	d__Bacteria	p__Patescibacteria	c__Paceibacteria	o__UBA6257	f__UBA9933	g__	s__	0.000423034	0.000425965	0.0396873	0.00080842	0.000314328	0.0330241	0.0124472	0.0828075	429123	66.1972	0
H41-bin057_1	d__Bacteria	p__Patescibacteria	c__Paceibacteria	o__UBA9983_A	f__UBA2163	g__OLB19	s__	0.00155416	0.0001256	0.341958	0.00176404	3.86816e-05	0.0636574	0.068183	0.1262	781180	78.8732	1.40845
H41-bin059_1	d__Bacteria	p__Patescibacteria	c__Paceibacteria	o__UBA9983_A	f__UBA11359_A	g__2-02-FULL-44-35	s__	0.0549742	0.0885717	0.0329332	0.153295	0.0595606	0.10862	0.0829924	0.0797326	423535	63.3803	0
H41-bin060_1	d__Bacteria	p__Proteobacteria	c__Gammaproteobacteria	o__Burkholderiales	f__Burkholderiaceae	g__Cupriavidus	s__Cupriavidus metallidurans	0.017508	0.00633466	0.000344325	0.00167084	0.000426338	0.0888135	0.0191829	0.145345	4117394	73.2394	4.22535
H41-bin061_1	d__Bacteria	p__Patescibacteria	c__Paceibacteria	o__2-02-FULL-40-12	f__	g__	s__	0.0662385	0.300762	0.0568606	0.0801245	0.0773386	0.127271	0.118099	0.0903309	512287	60.5634	0
H41-bin062_1	d__Archaea	p__Nanoarchaeota	c__Nanoarchaeia	o__Pacearchaeales	f__UBA73	g__UBA73	s__	0.0384125	0.00226153	0.0212111	0.00149162	0.00566806	0.08951	0.0264258	0.145443	657728	55.2632	0
H41-bin063_1	d__Archaea	p__Nanoarchaeota	c__Nanoarchaeia	o__Pacearchaeales	f__UBA73	g__1-14-0-10-34-76	s__	0.00289887	0.145006	0.0334379	0.000601067	0.00377391	0.0804409	0.0443597	0.139294	836590	59.2105	0
H41-bin064_1	d__Bacteria	p__Patescibacteria	c__Microgenomatia	o__GWA2-44-7	f__UBA8517	g__UBA12026	s__	0.0154972	0.113488	0.156388	0.0076697	0.0876255	0.317019	0.116281	0.412675	620921	71.831	0
H41-bin066_1	d__Archaea	p__Nanoarchaeota	c__Nanoarchaeia	o__Pacearchaeales	f__UBA73	g__UBA73	s__	0.00280249	0.000353841	0.0147475	0.0533391	7.87858e-05	0.0632751	0.0224328	0.110755	793522	61.8421	2.63158
H41-bin067_1	d__Bacteria	p__Patescibacteria	c__Paceibacteria	o__UBA9983_A	f__UBA1539	g__UBA1550	s__	0.0498747	0.0240342	0.711734	0.0860283	0.0159232	0.265503	0.192183	0.44568	751365	76.0563	1.40845
H41-bin069_1	d__Bacteria	p__Bacteroidota	c__UBA10030	o__UBA10030	f__UBA10030	g__2-02-FULL-55-14	s__	0.000392253	0.00113391	0.014304	0.0160461	0.00450572	0.0261821	0.0104273	0.0324768	1881766	78.8732	0
H41-bin070_1	d__Bacteria	p__Patescibacteria	c__Saccharimonadia	o__Saccharimonadales	f__UBA4665	g__UBA5150	s__	0.00314292	0.000217471	0.106058	0.0513586	6.87553e-05	0.03745	0.0330493	0.0486491	786323	54.9296	1.40845
H41-bin073_1	d__Bacteria	p__Patescibacteria	c__Paceibacteria	o__UBA9983_A	f__UBA1539	g__UBA1550	s__	0.000480022	0.00456276	0.0430882	0.00189555	0.00363201	0.0454746	0.0165222	0.0899424	472673	61.9718	0
H41-bin074	d__Bacteria	p__Patescibacteria	c__Paceibacteria	o__UBA9983_A	f__XYD1-FULL-46-19	g__21-14-all-37-9	s__	0.000404789	0.00189469	0.0242477	0.000393667	0.0105275	0.0272922	0.0107934	0.0370474	500987	50.7042	0
H41-bin075_1	d__Bacteria	p__Patescibacteria	c__Paceibacteria	o__UBA9983_A	f__Zambryskibacteraceae	g__	s__	0.000656369	0.000244694	0.0379911	0.0007465	0.000104396	0.0288712	0.0114357	0.072063	601069	71.831	1.40845
H41-bin076_1	d__Bacteria	p__Patescibacteria	c__Paceibacteria	o__Ryanbacterales	f__GWA2-47-10b	g__GWA2-47-10b	s__	0.0054677	0.000244183	0.0267512	0.000389773	0.000220281	0.0311374	0.0107018	0.0750708	855657	77.4648	0
H41-bin077_1	d__Bacteria	p__Patescibacteria	c__Paceibacteria	o__UBA9983_A	f__UBA2163	g__1-14-0-10-45-20	s__	0.0024982	6.7542e-05	0.0236252	0.000510894	5.37693e-05	0.012739	0.00658245	0.0279867	614486	59.1549	1.40845
H41-bin078_1	d__Bacteria	p__Patescibacteria	c__ABY1	o__SG8-24	f__2-12-FULL-60-25	g__21-14-all-47-17	s__	0.0256773	0.052612	0.444338	0.0117057	0.0569253	0.132555	0.120635	0.177652	931406	83.0986	0
H41-bin079	d__Bacteria	p__Patescibacteria	c__Paceibacteria	o__UBA9983_A	f__UBA2163	g__C7867-001	s__	0.015177	0.00693939	0.0560858	0.00720923	0.00376944	0.0482068	0.022898	0.0921172	670881	77.4648	0
H41-bin080	d__Bacteria	p__Patescibacteria	c__Paceibacteria	o__UBA9983_A	f__UBA2163	g__C7867-001	s__	0.017808	0.000969738	0.0851805	0.00753434	0.0170634	0.0415823	0.0283564	0.0476654	658598	85.9155	0
H41-bin081	d__Bacteria	p__Patescibacteria	c__Paceibacteria	o__UBA9983_A	f__UBA2163	g__1-14-0-10-45-20	s__	0.0050998	0.000312199	0.0347871	0.000990829	0.000548512	0.0196929	0.0102386	0.0413994	864785	78.8732	0
H41-bin082_1	d__Bacteria	p__Patescibacteria	c__Paceibacteria	o__UBA6257	f__GWB1-50-10	g__	s__	0.0269206	0.0593685	0.0826426	0.0128423	0.0639315	0.132222	0.0629879	0.169731	654420	73.2394	0
H41-bin083_1	d__Bacteria	p__Patescibacteria	c__ABY1	o__SG8-24	f__2-12-FULL-57-11	g__	s__	0.00883994	0.00843554	0.135904	0.0132588	0.00871317	0.0320448	0.0345327	0.0472479	889201	67.6056	0
H41-bin084_1	d__Bacteria	p__Elusimicrobiota	c__Elusimicrobia	o__UBA1565	f__UBA9628	g__GWA2-66-18	s__	0.108953	0.0286424	0.0780468	0.0264371	0.0273305	0.0565956	0.0543342	0.0581576	2762165	84.507	0
H41-bin087_1	d__Bacteria	p__Patescibacteria	c__Paceibacteria	o__UBA9983_A	f__UBA9973	g__UBA9973	s__	0.00825669	0.0173714	0.0453936	0.00627218	0.0031855	0.0544842	0.0224939	0.120059	535736	77.4648	1.40845
H41-bin088_1	d__Archaea	p__Nanoarchaeota	c__Nanoarchaeia	o__Woesearchaeales	f__GW2011-AR9	g__	s__	0.00416115	0.113738	0.16137	0.00982096	0.234041	0.109451	0.10543	0.0941931	554810	51.3158	3.94737
H41-bin089_1	d__Bacteria	p__Patescibacteria	c__Paceibacteria	o__2-02-FULL-40-12	f__	g__	s__	0.0213139	0.0137846	0.0670739	0.00692288	0.0419099	0.0667862	0.0362986	0.0628124	741722	76.0563	0
H41-bin090_1	d__Bacteria	p__Patescibacteria	c__Paceibacteria	o__Ryanbacterales	f__GWA2-47-10b	g__GWA2-47-10b	s__	0.0276885	0.00249795	0.0473653	0.00612227	0.0114823	0.0421489	0.0228842	0.052715	471869	66.1972	0
H41-bin091_1	d__Archaea	p__Nanoarchaeota	c__Nanoarchaeia	o__Pacearchaeales	f__GW2011-AR1	g__ASMP01	s__	0.00118025	0.0128017	0.0351533	0.0010594	0.0012356	0.0480979	0.016588	0.121184	874611	63.1579	0
H41-bin092_1	d__Bacteria	p__Patescibacteria	c__Paceibacteria	o__2-02-FULL-40-12	f__IGHO2-01-FULL-4-A	g__2-01-FULL-44-17	s__	0.00409993	0.021066	0.0286729	0.002376	0.000891772	0.0230673	0.0133623	0.0320156	695018	60.5634	0
H41-bin093_1	d__Bacteria	p__Elusimicrobiota	c__Elusimicrobia	o__	f__	g__	s__	0.00433482	0.00701661	0.0785784	0.0023455	0.00369378	0.0209312	0.0194834	0.0348304	1641627	74.6479	0
H41-bin094_1	d__Bacteria	p__Patescibacteria	c__Microgenomatia	o__UBA1406	f__GWC2-37-13	g__GWC2-37-13	s__	0.000715899	0.0974059	0.151221	0.128802	0.0254489	0.0583502	0.0769907	0.0524465	786610	69.0141	0
H41-bin097_1	d__Bacteria	p__Patescibacteria	c__Microgenomatia	o__Levybacterales	f__	g__	s__	0.000622707	0.0486033	0.0341474	0.0475743	0.00358279	0.0330161	0.0279244	0.0341205	511997	67.6056	1.40845
H41-bin099_1	d__Bacteria	p__Patescibacteria	c__Microgenomatia	o__GWA2-44-7	f__Amesbacteraceae	g__	s__	0.00186193	9.13217e-05	0.0244922	0.000641961	2.46131e-05	0.0123533	0.00657754	0.0269569	787288	60.5634	4.22535
H41-bin100_1	d__Bacteria	p__Patescibacteria	c__Paceibacteria	o__UBA9983_A	f__UBA9988	g__	s__	0.0155109	0.000845998	0.0399449	0.0167846	0.00194138	0.0535124	0.0214234	0.105499	618632	77.4648	0
H41-bin101_1	d__Bacteria	p__Patescibacteria	c__ABY1	o__SG8-24	f__UBA9934	g__UBA11707	s__	0.00201924	0.000313661	0.249534	0.0070994	7.18211e-05	0.0342666	0.0488842	0.0754189	603063	57.7465	0
H41-bin102_1	d__Bacteria	p__Patescibacteria	c__WWE3	o__UBA101185	f__2-01-FULL-41-18	g__	s__	0.00041889	0.000864632	0.329326	0.00476471	0.0136018	0.059256	0.0680387	0.108844	958710	84.507	5.6338
H41-bin103_1	d__Bacteria	p__Proteobacteria	c__Gammaproteobacteria	o__Burkholderiales	f__Burkholderiaceae	g__Cupriavidus	s__Cupriavidus metallidurans	0.0154554	0.00563848	0.000376944	0.00166575	0.000417257	0.0748433	0.0163995	0.122793	2727828	53.5211	1.40845
H41-bin104_1	d__Bacteria	p__Nitrospirota	c__Nitrospiria	o__Nitrospirales	f__Nitrospiraceae	g__Nitrospira_D	s__	0.0038047	0.155452	0.639083	0.014083	0.0526594	0.104307	0.161565	0.185367	1168126	61.9718	0
H41-bin109_1	d__Bacteria	p__Nitrospirota	c__Thermodesulfovibrionia	o__Thermodesulfovibrionales	f__UBA1546	g__UBA1546	s__	0.00417366	0.204949	1.49742	0.282659	1.80299	0.415951	0.701357	0.626434	742237	63.3803	0
H41-bin111_1	d__Bacteria	p__Patescibacteria	c__Paceibacteria	o__2-02-FULL-40-12	f__	g__	s__	0.00346096	0.00651791	0.0528656	0.00215374	0.010297	0.0837401	0.0265059	0.140035	656334	74.6479	0
H41-bin112_1	d__Bacteria	p__Patescibacteria	c__Paceibacteria	o__UBA9983_A	f__UBA9973	g__UBA9973	s__	0.0522885	0.00784205	0.10788	1.4296	0.026671	0.65434	0.37977	1.24958	576619	80.2817	0
H41-bin114_1	d__Bacteria	p__Patescibacteria	c__Paceibacteria	o__Sungbacterales	f__	g__	s__	0.041008	0.491633	0.077667	0.00219811	0.137885	0.125173	0.145927	0.151172	534997	61.9718	0
H41-bin115_1	d__Bacteria	p__Patescibacteria	c__Paceibacteria	o__UBA9983_A	f__UBA1539	g__	s__	0.00330034	0.292426	0.0492323	0.00112695	0.00247109	0.12744	0.0793328	0.198721	478913	57.7465	0
H41-bin116_1	d__Archaea	p__Nanoarchaeota	c__Nanoarchaeia	o__Pacearchaeales	f__GW2011-AR1	g__ASMP01	s__	0.000232607	0.000699295	0.0206373	0.0516777	0.00033303	0.0907613	0.0273902	0.162664	705108	64.4737	0
H41-bin117_1	d__Bacteria	p__Bdellovibrionota	c__Bacteriovoracia	o__UBA1018	f__UBA1018	g__	s__	0.00294012	5.81236e-05	0.0115318	0.00950369	0.0120832	0.029073	0.010865	0.0393356	2668842	67.6056	0
H41-bin121_1	d__Bacteria	p__Patescibacteria	c__Paceibacteria	o__UBA9983_A	f__UBA9973	g__UBA9973	s__	0.0372791	0.00127973	0.0930955	0.00110039	0.000301307	0.0323466	0.0275671	0.0448675	765419	83.0986	0
H41-bin122_1	d__Bacteria	p__Desulfuromonadota	c__	o__	f__	g__	s__	0.00614544	0.0803899	0.940268	0.248352	0.0615949	0.151235	0.247998	0.272131	589787	54.9296	0
H41-bin123_1	d__Bacteria	p__Patescibacteria	c__Microgenomatia	o__GWA2-44-7	f__UBA8517	g__	s__	0.0004501	0.0269026	0.119561	0.00435434	0.00441962	0.242503	0.066365	0.466743	521008	52.1127	1.40845
H41-bin124_1	d__Archaea	p__Nanoarchaeota	c__Nanoarchaeia	o__Pacearchaeales	f__GW2011-AR1	g__RBG-13-33-26	s__	0.00550046	0.0387069	0.0342983	0.00355621	0.0329996	0.0426121	0.0262789	0.0498109	751621	60.5263	2.63158
H41-bin125_1	d__Bacteria	p__Patescibacteria	c__Paceibacteria	o__Ryanbacterales	f__GWA2-47-10b	g__	s__	0.0107201	0.000176522	0.0403663	0.00142668	0.000226056	0.0245681	0.012914	0.0469711	815181	78.8732	0
H41-bin126_1	d__Bacteria	p__Patescibacteria	c__Paceibacteria	o__UBA9983	f__UBA9983	g__	s__	0.00213747	0.0704153	0.100202	0.0190019	0.105415	0.089934	0.0645177	0.103993	529230	76.0563	0
H41-bin127_1	d__Bacteria	p__Patescibacteria	c__Microgenomatia	o__UBA10105	f__UBA927	g__UBA927	s__	0.000674222	0.0838269	0.0683587	0.025604	0.00196294	0.050603	0.038505	0.0476345	829154	67.6056	0
H41-bin128_1	d__Bacteria	p__Patescibacteria	c__Paceibacteria	o__UBA9983_A	f__UBA11359_A	g__	s__	0.0142971	0.00532436	0.113653	0.0120863	0.00122817	0.0295297	0.0293532	0.0446279	843795	76.0563	0
H41-bin131_1	d__Bacteria	p__Patescibacteria	c__Paceibacteria	o__GWC2-36-17	f__M10-OD1-4	g__MEYI01	s__	0.00221299	0.00812198	0.0473203	0.0104444	0.0100821	0.0233938	0.0169293	0.025626	637247	73.2394	0
H41-bin132_1	d__Bacteria	p__Patescibacteria	c__Microgenomatia	o__UBA1406	f__GWC2-37-13	g__GWC2-37-13	s__	0.00249582	0.0710708	1.08494	0.0206272	0.0325922	0.190927	0.233775	0.350916	1029983	80.2817	0
H41-bin134_1	d__Bacteria	p__Patescibacteria	c__Microgenomatia	o__Curtissbacterales	f__GWA2-41-24	g__	s__	0.00536662	0.000851071	0.0335046	0.00106239	0.00997008	0.0476808	0.0164059	0.0866809	1028971	90.1408	1.40845
H41-bin135_1	d__Bacteria	p__Patescibacteria	c__Paceibacteria	o__UBA9983_A	f__UBA11359	g__	s__	0.0250677	0.00328565	0.0631634	0.0201411	0.0170013	0.0526824	0.0302236	0.0473443	791691	74.6479	1.40845
H41-bin136_1	d__Bacteria	p__Patescibacteria	c__Microgenomatia	o__Curtissbacterales	f__GWA2-41-24	g__	s__	0.00225474	0.0768886	0.0358534	0.00149716	0.0361943	0.0533446	0.0343388	0.0706323	689862	66.1972	0
H41-bin139_1	d__Bacteria	p__Patescibacteria	c__Paceibacteria	o__UBA9983_A	f__UBA2163	g__1-14-0-10-45-20	s__	0.000518003	0.000196741	0.0252843	0.000273914	0.000724739	0.00917223	0.00602833	0.0185557	696352	56.338	0
H41-bin140_1	d__Bacteria	p__Patescibacteria	c__Paceibacteria	o__UBA9983_A	f__UBA11359	g__PALSA-1337	s__	0.00607133	3.54211e-05	0.214772	0.0013301	4.84476e-05	0.192587	0.0691407	0.49612	635871	70.4225	1.40845
H41-bin141_1	d__Bacteria	p__Patescibacteria	c__Paceibacteria	o__UBA6257	f__2-01-FULL-56-20	g__	s__	0.00144424	0.000574689	0.0940458	0.000686218	0.0184673	0.0272826	0.0237501	0.0358881	652589	61.9718	1.40845
H41-bin142_1	d__Bacteria	p__Patescibacteria	c__Microgenomatia	o__UBA1406	f__GWC2-37-13	g__GWC2-37-13	s__	0.000750304	0.100838	0.45383	0.0132354	0.00681328	0.0728932	0.10806	0.135178	937584	80.2817	0
H41-bin144_1	d__Bacteria	p__Patescibacteria	c__Paceibacteria	o__UBA9983_A	f__UBA2163	g__	s__	0.0014703	0.000592049	0.0223411	0.000785416	0.0184842	0.0298587	0.0122553	0.0482982	637265	69.0141	0
H41-bin145_1	d__Bacteria	p__Patescibacteria	c__Saccharimonadia	o__Saccharimonadales	f__UBA10212	g__UBA6824	s__	0.0021868	0.00460447	0.0216578	0.000648275	0.0207605	0.0232967	0.0121924	0.0344	698901	74.6479	5.6338
H41-bin147_1	d__Bacteria	p__Patescibacteria	c__Paceibacteria	o__UBA9983_A	f__UBA11359	g__PALSA-1337	s__	0.00139557	9.33025e-05	0.0255955	0.000793858	1.2557e-05	0.0132497	0.00685676	0.0294072	540587	50.7042	1.40845
H41-bin149_1	d__Bacteria	p__Patescibacteria	c__Microgenomatia	o__UBA10105	f__UBA927	g__MFJZ01	s__	0.00110133	0.0171497	0.248014	0.0083012	0.0104742	0.0601721	0.0575354	0.0977856	1226197	77.4648	0
H41-bin150_1	d__Bacteria	p__Patescibacteria	c__Paceibacteria	o__UBA9983_A	f__Zambryskibacteraceae	g__UBA5004	s__	0.00297389	0.000214319	0.0197031	0.000745556	0.0014253	0.0239578	0.00817	0.0520102	506783	63.3803	0
H41-bin151_1	d__Bacteria	p__Patescibacteria	c__ABY1	o__UBA1558	f__2-01-FULL-52-15	g__	s__	0.00042444	0.000810282	0.0748749	0.000564802	0.00139738	0.0153916	0.0155772	0.0290164	1161276	78.8732	0
H41-bin152_1	d__Bacteria	p__Patescibacteria	c__Microgenomatia	o__UBA10105	f__UBA10105	g__	s__	0.000552788	0.00116578	0.0656441	0.00136686	0.00669362	0.0150091	0.015072	0.024229	1318333	64.7887	2.8169
H41-bin153_1	d__Archaea	p__Nanoarchaeota	c__Nanoarchaeia	o__Woesearchaeales	f__GW2011-AR9	g__	s__	0.00209362	0.00109282	0.064637	0.0194942	0.0171544	0.0196517	0.0206873	0.0207139	871486	52.6316	2.63158
H41-bin154_1	d__Bacteria	p__Patescibacteria	c__Paceibacteria	o__UBA6257	f__2-01-FULL-56-20	g__	s__	0.0003644	0.000194271	0.0530097	0.000674347	0.000399045	0.0214171	0.0126765	0.0476304	868523	78.8732	1.40845
H41-bin155_1	d__Bacteria	p__Patescibacteria	c__Paceibacteria	o__UBA9983_A	f__UBA2163	g__1-14-0-10-45-20	s__	0.00689188	0.0208587	0.0467311	0.00147202	0.000302243	0.0251022	0.016893	0.0453895	715012	83.0986	0
H41-bin156_1	d__Bacteria	p__Patescibacteria	c__Paceibacteria_A	o__Moranbacterales	f__UBA2206	g__UM-FILTER-42-9	s__	0.000490949	0.00479379	0.124982	0.0110801	0.00128008	0.0333059	0.0293222	0.0595359	717640	77.4648	0
H41-bin157_1	d__Bacteria	p__Patescibacteria	c__Paceibacteria	o__UBA9983_A	f__	g__	s__	0.00878189	0.00197279	0.0782056	0.00333725	0.00768949	0.0552291	0.0258694	0.112396	631992	77.4648	1.40845
H41-bin158_1	d__Bacteria	p__Proteobacteria	c__Alphaproteobacteria	o__Sphingomonadales	f__Sphingomonadaceae	g__	s__	0.00402023	0.000351948	0.222134	0.00208262	0.00115803	0.0250264	0.0424623	0.0658543	2343313	84.507	1.40845
H41-bin159_1	d__Bacteria	p__Planctomycetota	c__Phycisphaerae	o__UBA1845	f__UBA1845	g__	s__	0.0163486	0.0380961	0.272925	0.0645208	0.0735616	0.0504203	0.0859788	0.0780971	1418723	63.3803	0
H41-bin160_1	d__Bacteria	p__Elusimicrobiota	c__Elusimicrobia	o__UBA1565	f__UBA9628	g__GWA2-66-18	s__	0.00919101	0.00264831	0.266095	0.0171045	0.00841558	0.0343294	0.0562972	0.0776745	2677051	80.2817	1.40845
H41-bin161_1	d__Bacteria	p__Zixibacteria	c__MSB-5A5	o__GN15	f__FEB-12	g__	s__	0.00267073	0.0264727	0.181507	0.00343266	0.00251432	0.0233161	0.0399855	0.0532621	1675000	57.7465	0
H41-bin162	d__Bacteria	p__Patescibacteria	c__UBA1384	o__2-12-FULL-50-11	f__	g__	s__	0.00753487	0.0144337	0.168713	0.0112036	0.0347681	0.0295362	0.0443648	0.0473348	561124	71.831	1.40845
H41-bin163	d__Bacteria	p__Proteobacteria	c__Alphaproteobacteria	o__Caulobacterales	f__Parvularculaceae	g__CV81	s__	0.00600852	0.00158313	0.159371	0.00201244	0.00134179	0.0192128	0.0315883	0.0468977	2457310	73.2394	4.22535
H41-bin164_1	d__Bacteria	p__Bdellovibrionota	c__Bdellovibrionia	o__Bdellovibrionales	f__Bdellovibrionaceae	g__Bdellovibrio_A	s__	0.00249945	0.01296	0.21833	0.00356028	0.00804683	0.028152	0.0455914	0.0638631	2049158	76.0563	0
H41-bin165_1	d__Bacteria	p__Cyanobacteria	c__Sericytochromatia	o__	f__	g__	s__	0.00347865	0.000333138	0.206535	0.00136061	0.00845276	0.0252023	0.0408937	0.0607522	4306155	80.2817	1.40845
H41-bin166_1	d__Bacteria	p__Proteobacteria	c__Alphaproteobacteria	o__Sphingomonadales	f__Sphingomonadaceae	g__UBA1936	s__	0.00241356	0.000289367	0.227737	0.00160476	0.000271625	0.025003	0.0428865	0.0676912	2573104	84.507	0
H41-bin170_1	d__Bacteria	p__Nitrospirota	c__Nitrospiria	o__Nitrospirales	f__Nitrospiraceae	g__Palsa-1315	s__	0.039056	0.126768	0.69646	0.0347505	0.174581	0.124773	0.199398	0.198516	4206648	53.5211	1.40845
H41-bin172_1	d__Bacteria	p__Proteobacteria	c__Gammaproteobacteria	o__Acidiferrobacterales	f__Sulfurifustaceae	g__Sulfuricaulis	s__	0.037531	0.12089	0.223158	0.0496156	0.393953	0.0870817	0.152038	0.121765	1314874	57.7465	0
H41-bin173_1	d__Bacteria	p__Patescibacteria	c__Paceibacteria	o__UBA9983_A	f__	g__	s__	0.00208286	0.00177467	0.151103	0.00117696	0.000827495	0.0854945	0.0404099	0.203555	630764	61.9718	0
H41-bin176_1	d__Bacteria	p__Patescibacteria	c__Paceibacteria	o__UBA9983_A	f__UBA2163	g__UBA10103	s__	0.00288287	0.142306	0.440855	0.00596399	0.149001	0.0887191	0.138288	0.129621	486591	63.3803	0
H41-bin177_1	d__Bacteria	p__Nitrospirota	c__Thermodesulfovibrionia	o__UBA6902	f__UBA6902	g__	s__	0.000904995	0.0189267	0.164067	0.0828944	0.015638	0.0299753	0.0520677	0.0505933	1805992	64.7887	1.40845
H41-bin178_1	d__Bacteria	p__Patescibacteria	c__ABY1	o__SG8-24	f__UBA9934	g__UBA11707	s__	0.00741177	0.00599664	0.261107	0.00162717	0.00363843	0.0355123	0.052549	0.0776833	827057	69.0141	0
H41-bin179_1	d__Bacteria	p__Patescibacteria	c__ABY1	o__SG8-24	f__	g__	s__	0.00181214	0.00236725	0.180391	0.00609393	0.0167829	0.0245963	0.0386739	0.0526975	617961	66.1972	0
H41-bin180_1	d__Bacteria	p__Patescibacteria	c__ABY1	o__SG8-24	f__UBA9934	g__UBA11707	s__	0.00617512	0.000682115	0.157435	0.00173412	0.00226744	0.0207534	0.0315079	0.0466193	954109	78.8732	2.8169
H41-bin181_1	d__Bacteria	p__Patescibacteria	c__Paceibacteria	o__UBA9983_A	f__UBA1539	g__UBA1550	s__	0.000667062	0.000473506	0.410123	0.0127569	0.000111817	0.081629	0.0842936	0.155805	629186	73.2394	2.8169
H41-bin182_1	d__Bacteria	p__Patescibacteria	c__ABY1	o__SG8-24	f__UBA9934	g__UBA11707	s__	0.0117635	0.00597752	0.349831	0.0044146	0.00171243	0.0451757	0.0698125	0.103529	1051274	80.2817	1.40845
H41-bin183_1	d__Bacteria	p__Proteobacteria	c__Alphaproteobacteria	o__UBA3830	f__	g__	s__	0.00288864	0.000785754	0.283165	0.00173102	0.013063	0.0335569	0.0558651	0.0835911	427831	54.9296	1.40845
H41-bin184_1	d__Bacteria	p__Nitrospirota	c__Nitrospiria	o__Nitrospirales	f__Nitrospiraceae	g__Nitrospira_D	s__	0.00812802	0.279987	1.0374	0.0229831	0.0933686	0.171395	0.268877	0.301718	2599820	81.6901	0
H41-bin186_1	d__Bacteria	p__Nitrospirota	c__Nitrospiria	o__Nitrospirales	f__Nitrospiraceae	g__Palsa-1315	s__	0.0705801	0.148313	0.818384	0.101237	1.43084	0.289359	0.476452	0.44378	3306525	60.5634	2.8169
H41-bin188_1	d__Bacteria	p__Actinobacteriota	c__Acidimicrobiia	o__Microtrichales	f__Ilumatobacteraceae	g__	s__	0.00778962	0.239571	0.0741729	0.00363174	0.0115556	0.0356284	0.0620583	0.0711015	1477265	56.338	0
H41-bin189_1	d__Bacteria	p__Nitrospirota	c__Nitrospiria	o__Nitrospirales	f__Nitrospiraceae	g__Nitrospira	s__	0.00489274	0.00347071	0.802407	0.0139656	0.0930418	0.108752	0.171088	0.233859	3050953	59.1549	0
H41-bin190_1	d__Bacteria	p__Proteobacteria	c__Gammaproteobacteria	o__Burkholderiales	f__Nitrosomonadaceae	g__Nitrosomonas	s__	0.00328729	0.000346371	0.371077	0.0119451	0.0339465	0.0535035	0.0790176	0.108117	966894	60.5634	0
H41-bin191_1	d__Bacteria	p__Proteobacteria	c__Gammaproteobacteria	o__Burkholderiales	f__RBG-16-58-11	g__RBG-16-58-11	s__	0.118441	0.148684	0.346265	0.0168606	0.0265315	0.0743172	0.12185	0.102652	2578016	91.5493	1.40845
H41-bin193_1	d__Bacteria	p__Proteobacteria	c__Gammaproteobacteria	o__Burkholderiales	f__Nitrosomonadaceae	g__	s__	0.00325002	0.00221956	0.289906	0.0532421	0.678891	0.105978	0.188915	0.208793	1334254	53.5211	0
H41-bin194_1	d__Bacteria	p__Eisenbacteria	c__RBG-16-71-46	o__SZUA-252	f__SZUA-252	g__SZUA-252	s__	0.030595	0.0656652	0.344196	0.0156227	0.110751	0.0613863	0.104703	0.099828	2227979	61.9718	0
H41-bin195_1	d__Bacteria	p__Planctomycetota	c__Brocadiae	o__Brocadiales	f__Brocadiaceae	g__XYD2-FULL-41-16	s__	0.00300532	0.00359955	0.0541776	0.0399759	0.0659867	0.0180646	0.0308016	0.0238602	1139880	56.338	0
H41-bin196_1	d__Bacteria	p__Patescibacteria	c__Saccharimonadia	o__Saccharimonadales	f__2-12-FULL-41-12	g__2-12-FULL-41-12	s__	0.0013988	0.00052231	0.111281	0.014513	0.00101647	0.0217353	0.0250778	0.0343538	747762	54.9296	1.40845
H41-bin197_1	d__Bacteria	p__Patescibacteria	c__Microgenomatia	o__UBA1406	f__GWC2-37-13	g__GWC2-37-13	s__	0.0012016	0.0114224	0.147875	0.00768548	0.124258	0.0447214	0.056194	0.0527263	688952	60.5634	1.40845
H41-bin198_1	d__Bacteria	p__Chloroflexota	c__Dehalococcoidia	o__SM23-28-2	f__RBG-16-64-32	g__	s__	0.00894163	0.0540659	0.116488	0.00413321	0.0176131	0.0217627	0.0371674	0.0350381	1550620	57.7465	1.40845
H41-bin199_1	d__Archaea	p__Nanoarchaeota	c__Nanoarchaeia	o__Woesearchaeales	f__GW2011-AR15	g__GW2011-AR15	s__	0.000684867	0.00559008	0.155896	0.00167191	0.0273257	0.0219333	0.035517	0.0454107	974228	61.8421	0
H41-bin200_1	d__Bacteria	p__Proteobacteria	c__Gammaproteobacteria	o__Burkholderiales	f__Nitrosomonadaceae	g__Nitrosomonas	s__	0.000923877	0.000235519	0.298493	0.00588111	0.142913	0.0480195	0.0827443	0.0932676	2102653	90.1408	0
H41-bin201_1	d__Bacteria	p__Acidobacteriota	c__Blastocatellia	o__Pyrinomonadales	f__Pyrinomonadaceae	g__	s__	0.00335669	0.000472448	0.143828	0.000569228	0.00493974	0.0169972	0.0283605	0.0423886	2509116	61.9718	4.22535
H41-bin202_1	d__Bacteria	p__Patescibacteria	c__Gracilibacteria	o__UBA1369	f__LOWO2-01-FULL-3	g__2-01-FULL-39-12	s__	0.000487411	0.0527848	0.143044	0.0445081	0.024295	0.0297637	0.0491471	0.0416633	950065	76.0563	0
H41-bin204_1	d__Archaea	p__Nanoarchaeota	c__Nanoarchaeia	o__Woesearchaeales	f__GW2011-AR9	g__	s__	0.00337772	0.00174304	0.846862	0.128473	0.0151192	0.127707	0.187214	0.249344	1176572	76.3158	2.63158
H41-bin206_2	d__Bacteria	p__Patescibacteria	c__ABY1	o__SG8-24	f__UBA11717	g__	s__	0.000159214	0.0225146	0.142507	0.0443354	0.0829234	0.033749	0.0543648	0.0436078	385025	57.7465	0
H41-bin208_1	d__Bacteria	p__Patescibacteria	c__ABY1	o__SG8-24	f__SG8-24	g__	s__	0.00175221	0.000174749	0.138739	0.00172921	0.0145609	0.0213361	0.0297154	0.0412704	1098164	67.6056	0
H41-bin209_1	d__Bacteria	p__Patescibacteria	c__ABY1	o__Magasanikbacterales	f__UBA922	g__	s__	0.00364771	0.0020715	0.198832	0.00621422	0.0170294	0.026754	0.0424248	0.0580373	1070347	81.6901	1.40845
H41-bin210_1	d__Archaea	p__Micrarchaeota	c__Micrarchaeia	o__UBA8480	f__	g__	s__	3.36544e-05	5.11654e-05	0.14623	0.000819576	9.75995e-05	0.0198159	0.0278413	0.0446895	798496	57.8947	0
H41-bin211_1	d__Bacteria	p__Patescibacteria	c__ABY1	o__UBA2591	f__UBA4787	g__4787	s__	0.000368866	0.000417566	0.186131	0.00761278	0.0114125	0.0259003	0.0386406	0.0545615	643917	73.2394	0
H41-bin212_1	d__Bacteria	p__Proteobacteria	c__Gammaproteobacteria	o__Burkholderiales	f__Burkholderiaceae	g__Limnohabitans	s__	0.0870977	0.00341053	0.363589	0.0353788	0.0499437	0.0635283	0.100491	0.103684	3487738	83.0986	1.40845
H41-bin213_1	d__Bacteria	p__Gemmatimonadota	c__Gemmatimonadetes	o__Gemmatimonadales	f__Gemmatimonadaceae	g__Fen-1231	s__	0.0196167	0.193151	0.243665	0.158105	0.0713075	0.0728773	0.126454	0.0864933	2353989	81.6901	0
H41-bin214_1	d__Bacteria	p__Nitrospirota	c__Nitrospiria	o__Nitrospirales	f__Nitrospiraceae	g__Nitrospira_D	s__	0.00460957	0.237067	0.649315	0.0146943	0.0584471	0.116788	0.180153	0.192194	1496627	77.4648	0
H41-bin216_1	d__Bacteria	p__Nitrospirota	c__Nitrospiria	o__Nitrospirales	f__Nitrospiraceae	g__Nitrospira	s__	0.007082	0.00508238	5.95901	0.0965102	0.213943	0.678253	1.15998	1.76285	3561934	91.5493	0
H41-bin217_1	d__Bacteria	p__Patescibacteria	c__Paceibacteria	o__UBA6257	f__02-FULL-45-10c	g__	s__	0.0313998	0.0576999	0.28809	0.00405879	0.0615356	0.0679611	0.0851241	0.0788012	613295	64.7887	0
H41-bin218_1	d__Bacteria	p__Proteobacteria	c__Gammaproteobacteria	o__Burkholderiales	f__Nitrosomonadaceae	g__Nitrosomonas	s__	0.00223022	0.000859452	0.703601	0.374246	0.113763	0.134252	0.221492	0.219018	2089745	94.3662	0
H41-bin220_1	d__Bacteria	p__Proteobacteria	c__Gammaproteobacteria	o__Burkholderiales	f__Nitrosomonadaceae	g__Nitrosomonas	s__	0.00221708	0.00129195	1.4479	0.0129659	0.0091431	0.160773	0.272382	0.429996	1525204	73.2394	0
H41-bin222_1	d__Bacteria	p__Planctomycetota	c__Brocadiae	o__Brocadiales	f__Brocadiaceae	g__	s__	0.00402477	0.00453744	0.0681006	0.0466558	0.0852131	0.0226168	0.0385248	0.0301205	1879638	56.338	1.40845
H41-bin223_1	d__Bacteria	p__Planctomycetota	c__Brocadiae	o__	f__	g__	s__	0.000561898	0.0300955	2.32613	0.139018	0.0431027	0.270523	0.468239	0.687266	1271282	74.6479	1.40845
H41-bin224_1	d__Bacteria	p__Fibrobacterota	c__Fibrobacteria	o__UBA5070	f__UBA5070	g__UBA5070	s__	0.00162031	0.000428922	0.115643	0.0539477	0.00652461	0.0203105	0.0330791	0.0352741	4259539	61.9718	1.40845
H41-bin225_1	d__Bacteria	p__Patescibacteria	c__CPR2	o__UBA1875	f__	g__	s__	0.00148604	0.000237858	0.232623	0.0594469	0.00497975	0.0563439	0.0591862	0.0847377	609889	69.0141	0
H41-bin227_1	d__Bacteria	p__Nitrospirota	c__Nitrospiria	o__Nitrospirales	f__	g__	s__	0.309515	0.643236	0.171148	0.0140768	0.574457	0.185783	0.316369	0.232419	1271910	56.338	0
H41-bin234_1	d__Bacteria	p__Planctomycetota	c__Phycisphaerae	o__UBA1845	f__UBA1845	g__	s__	0.003056	0.00122159	0.133698	0.00412842	0.00168283	0.0291176	0.0288174	0.0511807	4553775	94.3662	1.40845
H41-bin235_1	d__Bacteria	p__Chloroflexota	c__Anaerolineae	o__Anaerolineales	f__	g__	s__	0.00562392	0.0476769	0.0944374	0.0467607	0.140756	0.0392497	0.0624175	0.0437056	4653590	61.9718	0
H41-bin236_1	d__Bacteria	p__Patescibacteria	c__Paceibacteria	o__UBA9983	f__UBA9983	g__UBA9983	s__	0.00748143	0.0290001	0.89892	0.119585	0.0667849	0.147797	0.211595	0.259062	329028	50.7042	0
H41-bin237_1	d__Bacteria	p__Gemmatimonadota	c__Gemmatimonadetes	o__Gemmatimonadales	f__GWC2-71-9	g__SZUA-320	s__	0.00249778	0.0322703	0.103034	0.00402955	0.0238097	0.0182734	0.0306525	0.0300774	2493627	87.3239	0
H41-bin238_1	d__Bacteria	p__Patescibacteria	c__Paceibacteria	o__UBA9983_A	f__GWA1-40-21	g__GWA1-40-21	s__	0.00523156	0.0242662	0.153087	0.00712287	0.00974223	0.0709924	0.0450737	0.131253	508875	66.1972	0
H41-bin239_1	d__Bacteria	p__Patescibacteria	c__Paceibacteria	o__UBA9983_A	f__UBA9973	g__UBA9973	s__	0.00635399	0.0206389	0.469842	0.00797331	0.0945322	0.12795	0.121215	0.16162	317562	52.1127	1.40845
H41-bin242_1	d__Bacteria	p__Proteobacteria	c__Alphaproteobacteria	o__Caulobacterales	f__Hyphomonadaceae	g__UBA1942	s__	0.000458557	4.74545e-05	0.166975	0.000850756	4.73826e-05	0.0191125	0.0312486	0.0494868	1236835	50.7042	0
H41-bin244_1	d__Bacteria	p__Verrucomicrobiota	c__Verrucomicrobiae	o__Pedosphaerales	f__Pedosphaeraceae	g__	s__	0.00755491	0.000802347	0.220126	0.0037628	0.00169403	0.0267642	0.0434508	0.0648605	2644910	52.1127	5.6338
H41-bin245_1	d__Bacteria	p__Planctomycetota	c__Brocadiae	o__Brocadiales	f__Scalinduaceae	g__Scalindua	s__	0.00208145	0.0120912	0.232302	0.00565586	0.0515943	0.0363612	0.056681	0.0667627	2733070	94.3662	0
H41-bin247_1	d__Bacteria	p__Nitrospirota	c__Thermodesulfovibrionia	o__UBA6902	f__UBA6902	g__	s__	0.000277523	0.0160007	0.15609	0.0778785	0.00696443	0.0272303	0.047407	0.0484562	1623867	60.5634	1.40845
H41-bin248_1	d__Bacteria	p__Nitrospirota	c__UBA9217	o__UBA9217	f__UBA9217	g__	s__	0.000818939	0.000572739	0.1413	0.00320835	0.0075667	0.0163263	0.0282988	0.0417415	2950882	60.5634	7.04225
H41-bin249_1	d__Bacteria	p__Patescibacteria	c__ABY1	o__Magasanikbacterales	f__UBA10003	g__	s__	0.0010044	0.0259548	0.112482	0.0434571	0.14352	0.0365481	0.0604944	0.0479381	591437	61.9718	0
H41-bin250_1	d__Bacteria	p__Patescibacteria	c__Microgenomatia	o__UBA10105	f__UBA927	g__	s__	0.00357217	0.00524614	0.474942	0.0188675	0.00355056	0.100506	0.101114	0.15077	1058146	73.2394	1.40845
H41-bin251_1	d__Bacteria	p__Patescibacteria	c__ABY1	o__Magasanikbacterales	f__2-02-FULL-50-9b	g__	s__	0.00997722	0.000969476	0.546299	0.00306736	0.000812652	0.0933069	0.109072	0.18466	907835	81.6901	0
H41-bin252_1	d__Bacteria	p__Planctomycetota	c__Brocadiae	o__MHYJ01	f__	g__	s__	0.00015198	0.00868633	0.189244	0.00441659	0.00366386	0.0218091	0.0379954	0.0559363	2503359	84.507	1.40845
H41-bin253_1	d__Bacteria	p__Patescibacteria	c__UBA1384	o__2-12-FULL-50-11	f__	g__	s__	0.000728724	0.0807218	0.209672	0.00822956	0.122849	0.0446737	0.0778124	0.0678877	839581	80.2817	1.40845
H41-bin254_1	d__Bacteria	p__Patescibacteria	c__ABY1	o__SG8-24	f__	g__	s__	0.029874	0.00106614	0.502946	0.00507632	0.00163352	0.067051	0.101274	0.148037	1087502	83.0986	2.8169
H41-bin255_1	d__Bacteria	p__Patescibacteria	c__Gracilibacteria	o__UBA1369	f__UBA12463	g__	s__	0.0019137	0.00042588	0.323622	0.00494923	0.00130162	0.0370942	0.0615512	0.0960923	1018961	81.6901	1.40845
H41-bin256_1	d__Bacteria	p__Patescibacteria	c__Paceibacteria	o__Sungbacterales	f__	g__	s__	0.00257381	0.0301428	0.315524	0.00325216	0.0144021	0.0533336	0.0698715	0.0955817	699755	74.6479	0
H41-bin257_1	d__Bacteria	p__Patescibacteria	c__Doudnabacteria	o__UBA920	f__	g__	s__	0.0106282	0.197063	0.44859	0.0297811	0.0018847	0.212072	0.150003	0.379563	724694	84.507	2.8169
H41-bin258_1	d__Bacteria	p__Proteobacteria	c__Alphaproteobacteria	o__	f__	g__	s__	0.0307576	0.00335356	1.4405	0.0155561	0.021073	0.171207	0.280407	0.42561	2095094	98.5915	0
H41-bin260_1	d__Bacteria	p__Chloroflexota_A	c__Ellin6529	o__CSP1-4	f__CSP1-4	g__	s__	0.0167303	0.0505216	0.533186	0.00812185	0.0124543	0.0726582	0.115612	0.155022	3043168	94.3662	1.40845
H41-bin261_1	d__Bacteria	p__Patescibacteria	c__Paceibacteria	o__UBA9983_A	f__21-14-all-36-13	g__	s__	0.00314726	0.0380447	1.52289	0.0555056	0.0722954	0.363881	0.342627	0.554366	422486	53.5211	0
H41-bin263_1	d__Bacteria	p__Patescibacteria	c__Paceibacteria	o__UBA6257	f__UBA9933	g__	s__	0.00659507	0.00843133	0.387363	0.0120188	0.00530526	0.141122	0.0934727	0.287683	434406	66.1972	0
H41-bin264_1	d__Bacteria	p__GWC2-55-46	c__GWC2-55-46	o__	f__	g__	s__	0.00245464	0.0591144	0.97917	0.216355	0.0450151	0.143364	0.240912	0.285271	345751	59.1549	0
H41-bin265_1	d__Bacteria	p__Patescibacteria	c__ABY1	o__SG8-24	f__2-12-FULL-60-25	g__SZUA-46	s__	0.0106804	0.00852582	0.612561	0.06757	0.520118	0.140526	0.226664	0.215052	1088280	78.8732	0
H41-bin266_1	d__Bacteria	p__Patescibacteria	c__Gracilibacteria	o__UBA1369	f__LOWO2-01-FULL-3	g__2-01-FULL-39-12	s__	0.000272368	0.0368575	0.106254	0.0354714	0.0165939	0.0219431	0.0362321	0.0309685	565623	53.5211	0
H41-bin267_1	d__Bacteria	p__Patescibacteria	c__WWE3	o__PEYW01	f__	g__	s__	0.000727814	0.0376249	0.380107	0.0118953	0.0209561	0.0500209	0.0835553	0.111062	968139	74.6479	1.40845
H41-bin268_1	d__Bacteria	p__Nitrospirota	c__Nitrospiria	o__Nitrospirales	f__Nitrospiraceae	g__Nitrospira_D	s__	0.00509506	0.230449	0.699498	0.0168891	0.0667867	0.122177	0.190149	0.205219	1636521	66.1972	0
H41-bin269_1	d__Bacteria	p__Nitrospirota	c__Nitrospiria	o__Nitrospirales	f__	g__	s__	0.326682	0.693156	0.172536	0.0143752	0.675796	0.203273	0.347636	0.260444	1504325	63.3803	0
H41-bin270_1	d__Bacteria	p__Nitrospirota	c__Nitrospiria	o__Nitrospirales	f__Nitrospiraceae	g__Palsa-1315	s__	0.0895511	0.705536	0.440836	0.105128	0.13381	0.179276	0.27569	0.220905	2532508	74.6479	0
H41-bin272_1	d__Bacteria	p__Patescibacteria	c__Paceibacteria	o__UBA6257	f__UBA9933	g__UM-FILTER-39-64	s__	0.00450674	0.10698	1.08301	0.0267185	0.154388	0.747677	0.353879	1.21377	259573	50.7042	0
H41-bin274_1	d__Bacteria	p__Nitrospirota	c__Nitrospiria	o__Nitrospirales	f__Nitrospiraceae	g__Nitrospira_A	s__	0.00480527	0.0206479	2.19136	0.0201822	0.0100792	0.240604	0.414613	0.651048	4240547	100	0
H41-bin275_1	d__Bacteria	p__Gemmatimonadota	c__Gemmatimonadetes	o__Gemmatimonadales	f__GWC2-71-9	g__SZUA-320	s__	0.00187703	0.0247253	0.0750976	0.00255531	0.018592	0.0136192	0.0227444	0.0220036	1660257	70.4225	0
H41-bin276	d__Bacteria	p__Eisenbacteria	c__RBG-16-71-46	o__SZUA-252	f__SZUA-252	g__SZUA-252	s__	0.0788324	0.00900344	0.233884	0.0101948	0.058813	0.0445741	0.0725504	0.0681007	2946627	61.9718	2.8169
H41-bin277_1	d__Bacteria	p__Nitrospirota	c__UBA9217	o__UBA9217	f__UBA9217	g__	s__	0.00165135	0.00096582	0.369037	0.00763232	0.00148843	0.177964	0.0931231	0.406883	3668535	94.3662	4.22535
H41-bin278_1	d__Bacteria	p__Planctomycetota	c__Brocadiae	o__Brocadiales	f__Brocadiaceae	g__XYD2-FULL-41-16	s__	0.00280936	0.00461923	0.0545262	0.0397406	0.0670597	0.0184747	0.031205	0.0239278	1065995	54.9296	1.40845
H41-bin279_1	d__Bacteria	p__GWC2-55-46	c__GWC2-55-46	o__GWC2-55-46	f__GWC2-55-46	g__	s__	0.00365735	0.500253	0.70623	0.0195907	0.0711677	0.140007	0.240151	0.237757	2455452	95.7746	0
H41-bin280_1	d__Bacteria	p__Nitrospirota	c__Thermodesulfovibrionia	o__Thermodesulfovibrionales	f__UBA1546	g__	s__	0.00122016	0.00767931	0.301355	0.103105	0.145198	0.0599438	0.103084	0.0935081	2056698	77.4648	4.22535
H41-bin281_1	d__Bacteria	p__MBNT15	c__MBNT15	o__MBNT15	f__MBNT15	g__CG2-30-66-27	s__	0.00258733	0.0251627	0.379602	0.172625	0.088803	0.0702327	0.123169	0.115648	1237018	71.831	0
H41-bin282	d__Bacteria	p__Bacteroidota	c__Bacteroidia	o__AKYH767	f__Palsa-948	g__Palsa-948	s__	0.019903	0.00692082	0.158286	0.0321802	0.0184398	0.025086	0.0434693	0.0454809	2386678	70.4225	1.40845
H41-bin283_1	d__Bacteria	p__Patescibacteria	c__ABY1	o__SG8-24	f__UBA9934	g__UBA11707	s__	0.00115332	0.000445049	0.123838	0.00223846	0.00233168	0.0145044	0.0240852	0.0365722	987981	50.7042	8.4507
H41-bin285_1	d__Bacteria	p__Patescibacteria	c__Gracilibacteria	o__UBA1369	f__2-02-FULL-48-14	g__	s__	0.00659989	0.000291247	0.149772	0.000802581	0.000449057	0.0191689	0.029514	0.0443116	832597	59.1549	1.40845
H41-bin286_1	d__Bacteria	p__Patescibacteria	c__ABY1	o__Magasanikbacterales	f__GWA2-37-8	g__2-02-FULL-45-10	s__	0.00855954	0.00167024	0.218597	0.0169998	0.000462005	0.0322424	0.0464219	0.0644413	938994	76.0563	1.40845
H41-bin287_1	d__Bacteria	p__Patescibacteria	c__ABY1	o__SG8-24	f__UBA9568	g__	s__	0.0024118	0.000305181	0.180984	0.033022	0.239892	0.0502479	0.0844771	0.0818315	683018	73.2394	0
H43-bin001_1	d__Bacteria	p__Patescibacteria	c__Microgenomatia	o__GWA2-44-7	f__UBA8517	g__UBA12026	s__	0.0017012	0.000769876	0.000856666	0.0883766	0.000411838	0.0562134	0.0247216	0.132444	672986	69.0141	2.8169
H43-bin002	d__Bacteria	p__Patescibacteria	c__ABY1	o__Magasanikbacterales	f__UBA10197	g__	s__	0.00146288	0.00390339	0.11111	0.260364	0.0102489	0.0777206	0.0774683	0.100487	635655	67.6056	0
H43-bin004_1	d__Bacteria	p__Patescibacteria	c__Microgenomatia	o__GWA2-44-7	f__	g__	s__	0.00112679	0.00713213	0.000416886	0.0393583	0.00452411	0.047723	0.0167135	0.0945963	411049	57.7465	0
H43-bin006_1	d__Bacteria	p__Patescibacteria	c__Paceibacteria	o__UBA6257	f__2-01-FULL-56-20	g__	s__	0.0039477	0.0417313	0.0425572	0.150705	0.00369169	0.0894248	0.055343	0.130819	758531	74.6479	1.40845
H43-bin007_1	d__Archaea	p__Nanoarchaeota	c__Nanoarchaeia	o__Pacearchaeales	f__UBA73	g__UBA73	s__	0.00071414	0.000156411	3.78576e-05	0.166984	0.000197246	0.0462889	0.0357297	0.0948897	658329	52.6316	0
H43-bin009_1	d__Bacteria	p__Patescibacteria	c__Paceibacteria	o__Ryanbacterales	f__GWA2-47-10b	g__GWA2-47-10b	s__	0.00215691	0.000243755	0.000192487	0.0777382	0.000300576	0.0393528	0.0199975	0.0915451	837161	74.6479	0
H43-bin010_1	d__Bacteria	p__Patescibacteria	c__Paceibacteria	o__UBA6257	f__GWB1-50-10	g__GCA-2686365	s__	0.00317201	0.00903634	0.00262233	0.144079	0.0181269	0.0502907	0.0378878	0.0781178	670619	71.831	1.40845
H43-bin011_1	d__Bacteria	p__Patescibacteria	c__Paceibacteria	o__UBA6257	f__2-01-FULL-56-20	g__2-01-FULL-56-20	s__	0.0011903	0.00451784	0.000667283	0.127523	0.000463513	0.0367546	0.0285195	0.074451	699541	63.3803	1.40845
H43-bin012_1	d__Bacteria	p__Patescibacteria	c__Paceibacteria	o__UBA9983_A	f__	g__	s__	0.00665873	0.00175397	0.00249468	0.382657	0.00177291	0.113572	0.0848183	0.23017	701796	78.8732	0
H43-bin013	d__Bacteria	p__Patescibacteria	c__ABY1	o__Buchananbacterales	f__2-01-FULL-39-33	g__	s__	1.48986e-05	0.000104828	1.98235e-05	0.0930087	8.29392e-05	0.0252464	0.0197463	0.0522578	562229	52.1127	1.40845
H43-bin014_1	d__Archaea	p__Nanoarchaeota	c__Nanoarchaeia	o__Pacearchaeales	f__GW2011-AR1	g__	s__	0.00405167	0.00293966	0.000832897	0.0638008	0.00243766	0.0599119	0.0223291	0.147974	615462	57.8947	1.31579
H43-bin015_1	d__Bacteria	p__Patescibacteria	c__Paceibacteria	o__UBA9983_A	f__UBA9988	g__	s__	0.00108114	0.000633642	0.000654894	0.405508	0.000380177	0.10174	0.0849997	0.206545	586584	53.5211	0
H43-bin017_1	d__Bacteria	p__Patescibacteria	c__Paceibacteria	o__UBA9983_A	f__Zambryskibacteraceae	g__UBA5004	s__	0.183871	0.00192708	0.000214004	0.09542	0.000662209	0.13421	0.0693841	0.20489	456841	69.0141	0
H43-bin018_1	d__Bacteria	p__Patescibacteria	c__Microgenomatia	o__GWA2-44-7	f__UBA8517	g__	s__	0.00659439	0.0194384	0.00391486	0.100145	0.0041718	0.0979355	0.0387	0.201748	701678	76.0563	2.8169
H43-bin019_1	d__Bacteria	p__Patescibacteria	c__Paceibacteria	o__UBA9983_A	f__Zambryskibacteraceae	g__WO2-35-19	s__	0.025902	0.00847814	0.200047	0.216811	0.0137797	0.342061	0.134513	0.545365	603254	71.831	0
H43-bin020	d__Archaea	p__Nanoarchaeota	c__Nanoarchaeia	o__Woesearchaeales	f__ARS49	g__	s__	0.0832899	0.000145976	4.04627e-05	0.220912	6.72341e-05	0.0577179	0.0603622	0.0807212	900825	50	1.31579
H43-bin022_1	d__Bacteria	p__Patescibacteria	c__Paceibacteria	o__UBA9983_A	f__Zambryskibacteraceae	g__UBA5004	s__	0.0102144	8.30202e-05	1.38608e-05	0.0410787	4.7399e-05	0.0367852	0.0147038	0.0802939	353006	54.9296	1.40845
H43-bin024_1	d__Bacteria	p__Patescibacteria	c__Paceibacteria	o__UBA9983_A	f__UBA9973	g__UBA8515	s__	0.0235016	0.00105735	0.000910509	0.222471	0.00653015	0.0897516	0.0573704	0.172608	647918	77.4648	2.8169
H43-bin025_1	d__Bacteria	p__Patescibacteria	c__Paceibacteria	o__UBA9983_A	f__UBA2163	g__GWA1-54-10	s__	0.0154032	0.0117463	0.000423675	0.0967872	0.00277426	0.0496859	0.0294701	0.0910275	658595	63.3803	0
H43-bin026_1	d__Bacteria	p__Patescibacteria	c__Paceibacteria	o__2-02-FULL-40-12	f__IGHO2-01-FULL-4-A	g__	s__	0.0338756	0.0197087	0.0145505	0.110737	0.0307848	0.0887447	0.0497335	0.126273	528978	70.4225	0
H43-bin027_1	d__Bacteria	p__Patescibacteria	c__Microgenomatia	o__GWA2-44-7	f__UBA8517	g__RBG-13-46-13	s__	0.000876757	0.00995265	0.000270814	0.040169	0.000521802	0.0485235	0.0167191	0.11914	711443	50.7042	4.22535
H43-bin028_1	d__Archaea	p__Nanoarchaeota	c__Nanoarchaeia	o__SCGC-AAA011-G17	f__	g__	s__	0.00268734	0.00478718	0.0180945	0.21894	0.0279721	0.0754636	0.0579908	0.111882	931160	75	1.31579
H43-bin029_1	d__Bacteria	p__Patescibacteria	c__Paceibacteria	o__UBA9983_A	f__UBA1539	g__	s__	0.00430746	0.0672735	0.00944737	0.911146	0.00266866	0.132321	0.187861	0.274471	682114	73.2394	1.40845
H43-bin030_1	d__Bacteria	p__Patescibacteria	c__Paceibacteria	o__UBA9983_A	f__UBA2163	g__UBA10103	s__	0.00867942	0.000485179	0.000445588	0.0937486	0.000471087	0.052383	0.0260355	0.120739	630455	67.6056	0
H43-bin034_1	d__Bacteria	p__Patescibacteria	c__Paceibacteria	o__UBA9983	f__	g__	s__	4.1936e-05	0.0075462	0.00238829	0.167534	0.00318392	0.038617	0.036552	0.0715747	317963	50.7042	0
H43-bin036_1	d__Archaea	p__Nanoarchaeota	c__Nanoarchaeia	o__Pacearchaeales	f__	g__	s__	0.00603814	0.000267673	0.000159893	0.177467	0.000147874	0.0772887	0.0435616	0.173048	723900	52.6316	2.63158
H43-bin037_1	d__Bacteria	p__Patescibacteria	c__Microgenomatia	o__UBA10105	f__UBA927	g__	s__	0.000594856	0.0542354	0.00465863	0.248108	0.00115388	0.0610818	0.0616388	0.104975	545833	63.3803	0
H43-bin038_1	d__Bacteria	p__Patescibacteria	c__Microgenomatia	o__Levybacterales	f__UBA12049	g__UBA12049	s__	0.0008312	0.00358415	0.00154632	0.0812041	0.00362053	0.0370212	0.0213013	0.0783274	539873	61.9718	4.22535
H43-bin039_1	d__Bacteria	p__Patescibacteria	c__Paceibacteria	o__UBA6257	f__GWB1-50-10	g__	s__	0.00129467	0.0134996	0.0035756	0.0802862	0.00187721	0.0296332	0.0216944	0.0536955	565645	54.9296	0
H43-bin040_1	d__Bacteria	p__Patescibacteria	c__Paceibacteria	o__UBA9983_A	f__UBA11359	g__C7867-002	s__	0.00125012	0.000230839	9.53712e-05	0.075302	9.61257e-05	0.0337486	0.0184538	0.0773035	820555	61.9718	5.6338
H43-bin041_1	d__Archaea	p__Nanoarchaeota	c__Nanoarchaeia	o__Pacearchaeales	f__GW2011-AR1	g__ASMP01	s__	0.000653317	0.00346034	0.000930256	0.154119	0.00111429	0.0948786	0.042526	0.228877	889329	60.5263	0
H43-bin043_1	d__Bacteria	p__Patescibacteria	c__UBA1384	o__2-12-FULL-50-11	f__2-12-FULL-50-11	g__	s__	0.00030495	0.000220369	3.35608e-05	0.261876	5.68842e-05	0.0730426	0.0559224	0.15169	562380	70.4225	1.40845
H43-bin044_1	d__Bacteria	p__Patescibacteria	c__Paceibacteria	o__UBA6257	f__2-01-FULL-56-20	g__	s__	0.000106962	0.000290639	0.000359021	0.0457807	0.000347903	0.0327347	0.01327	0.0816142	461151	59.1549	0
H43-bin045_1	d__Bacteria	p__Patescibacteria	c__Doudnabacteria	o__UBA920	f__2-01-FULL-50-11	g__	s__	5.80078e-05	2.76177e-05	3.90028e-05	0.18623	3.18068e-05	0.0466268	0.0388355	0.0954289	748173	60.5634	1.40845
H43-bin046_1	d__Archaea	p__Nanoarchaeota	c__Nanoarchaeia	o__Pacearchaeales	f__	g__	s__	0.00106325	0.00333405	0.000744772	0.18832	0.00405873	0.0564521	0.0423289	0.114412	983931	53.9474	1.31579
H43-bin047_1	d__Bacteria	p__Patescibacteria	c__Paceibacteria_A	o__Moranbacterales	f__UBA1568	g__UBA1568	s__	0.232591	0.0124392	0.00490543	0.473586	0.00311177	0.124877	0.141918	0.159687	768992	80.2817	0
H43-bin049_1	d__Bacteria	p__Proteobacteria	c__Alphaproteobacteria	o__Sphingomonadales	f__Sphingomonadaceae	g__Sphingobium	s__	0.0362919	0.00552112	0.000863727	0.00428411	0.00300881	0.0436592	0.0156048	0.0829345	1876397	73.2394	0
H43-bin050_1	d__Bacteria	p__Patescibacteria	c__Paceibacteria	o__UBA9983_A	f__UBA11359	g__UBA6065	s__	0.029799	0.0766131	0.0066451	0.134588	0.011325	0.0895106	0.0580802	0.124328	408983	66.1972	0
H43-bin051_1	d__Bacteria	p__Patescibacteria	c__Paceibacteria	o__UBA6257	f__2-01-FULL-56-20	g__	s__	0.0580513	0.0380866	0.0235889	0.38416	0.00729644	0.10093	0.102019	0.146922	693689	67.6056	0
H43-bin052_1	d__Bacteria	p__Patescibacteria	c__Paceibacteria	o__Paceibacterales	f__2-02-FULL-43-13	g__2-02-FULL-43-13	s__	0.000600979	0.000842355	0.000780716	0.444984	0.000441065	0.18263	0.105047	0.418583	471884	71.831	0
H43-bin053_1	d__Bacteria	p__Patescibacteria	c__ABY1	o__Buchananbacterales	f__2-01-FULL-39-33	g__	s__	0.000977433	0.00143855	0.00113289	1.08852	0.00219684	0.18526	0.213254	0.374494	811691	84.507	0
H43-bin054_1	d__Bacteria	p__Patescibacteria	c__Paceibacteria	o__UBA9983_A	f__UBA1539	g__	s__	0.00227528	0.00281846	0.00704509	0.205566	0.00188112	0.0952931	0.0524799	0.206306	503589	69.0141	0
H43-bin055_1	d__Bacteria	p__Patescibacteria	c__Paceibacteria	o__UBA9983_A	f__UBA1539	g__	s__	0.00102436	0.000246831	5.67514e-05	0.0510337	0.000170729	0.0535947	0.0176878	0.142043	600238	76.0563	1.40845
H43-bin056_1	d__Bacteria	p__Patescibacteria	c__Paceibacteria	o__UBA9983_A	f__Zambryskibacteraceae	g__WO2-35-19	s__	0.000858957	4.36406e-06	0.000134109	0.152829	6.36308e-05	0.0939796	0.0413117	0.233257	617967	77.4648	0
H43-bin057	d__Bacteria	p__Patescibacteria	c__Paceibacteria	o__Portnoybacterales	f__GWB1-42-6	g__GWB1-42-6	s__	9.77154e-05	0.00415419	0.0107064	0.174398	0.00327863	0.0521992	0.0408056	0.0972	584987	59.1549	5.6338
H43-bin058_1	d__Bacteria	p__Patescibacteria	c__UBA1384	o__UBA12157	f__UBA12157	g__	s__	0.000135186	5.59191e-05	1.79596e-05	0.0943359	5.4426e-05	0.0679931	0.0270987	0.172803	583070	69.0141	0
H43-bin061_1	d__Bacteria	p__Patescibacteria	c__Microgenomatia	o__Levybacterales	f__UBA12049	g__2-01-FULL-39-10-A	s__	0.00175302	0.126495	0.00231429	0.0227903	0.00222784	0.0524088	0.0346648	0.0754449	745021	70.4225	2.8169
H43-bin063_1	d__Bacteria	p__Patescibacteria	c__Paceibacteria	o__UBA9983_A	f__UBA2163	g__C7867-001	s__	0.0148688	0.0394034	0.0310196	0.707256	0.00755447	0.226348	0.171075	0.404425	516631	57.7465	0
H43-bin064_1	d__Bacteria	p__Patescibacteria	c__Paceibacteria	o__2-02-FULL-40-12	f__GWA2-44-9	g__	s__	0.00608475	0.000827662	0.000116612	0.0322911	0.000159651	0.0519394	0.0152365	0.120376	477081	57.7465	0
H43-bin065	d__Archaea	p__Nanoarchaeota	c__Nanoarchaeia	o__Woesearchaeales	f__ARS49	g__	s__	0.00270427	0.00025492	0.0017515	0.035	0.00266115	0.0398997	0.0137119	0.0650547	703488	51.3158	1.31579
H43-bin068_1	d__Bacteria	p__Patescibacteria	c__Paceibacteria	o__UBA9983_A	f__UBA2163	g__GWA1-54-10	s__	0.00585444	9.99099e-05	4.32714e-05	0.0554109	0.000146339	0.0566987	0.0197089	0.142584	657193	81.6901	0
H43-bin070_1	d__Bacteria	p__Patescibacteria	c__Microgenomatia	o__GWA2-44-7	f__	g__	s__	0.00200177	0.11559	0.00393776	0.246619	0.0125602	0.0828384	0.0772577	0.121513	626873	64.7887	0
H43-bin071	d__Bacteria	p__Patescibacteria	c__Andersenbacteria	o__UBA10190	f__UBA10190	g__HO2-45-11b	s__	0.00120537	0.000215021	0.000136313	0.0578474	9.0317e-05	0.0222826	0.0136295	0.0487441	1102030	60.5634	2.8169
H43-bin072_1	d__Bacteria	p__Patescibacteria	c__Paceibacteria	o__WOR2-41-13_A	f__2-01-FULL-45-33	g__	s__	0.000982539	0.00134979	0.00037389	0.336766	0.00134069	0.0666416	0.0679091	0.131359	711390	63.3803	0
H43-bin073_1	d__Bacteria	p__Patescibacteria	c__Paceibacteria	o__UBA9983_A	f__UBA9988	g__	s__	0.000919616	7.0502e-05	0.000257593	0.0691647	0.0198798	0.0565833	0.0244793	0.0953904	503877	63.3803	0
H43-bin074_1	d__Bacteria	p__Patescibacteria	c__Paceibacteria	o__UBA6257	f__GWB1-50-10	g__	s__	0.000218798	0.000650211	0.0190252	0.130693	0.000742975	0.0656079	0.0361563	0.124372	481057	70.4225	0
H43-bin075_1	d__Bacteria	p__Patescibacteria	c__Paceibacteria	o__Paceibacterales	f__	g__	s__	0.00022584	0.00214341	0.00340272	0.843504	0.000486903	0.128071	0.162972	0.2701	469535	67.6056	1.40845
H43-bin076_1	d__Bacteria	p__Patescibacteria	c__Paceibacteria	o__UBA6257	f__GWB1-50-10	g__GWA1-48-11	s__	0.000587554	0.0001386	4.3503e-05	0.150818	8.64796e-05	0.0927475	0.0407369	0.230523	605612	73.2394	0
H43-bin077_1	d__Bacteria	p__Proteobacteria	c__Gammaproteobacteria	o__Burkholderiales	f__Burkholderiaceae	g__Cupriavidus	s__Cupriavidus metallidurans	0.0392979	0.00510014	0.000700812	0.00341088	0.000965574	0.183714	0.0388649	0.31089	5640740	98.5915	2.8169
H43-bin078_1	d__Archaea	p__Nanoarchaeota	c__Nanoarchaeia	o__Pacearchaeales	f__PFDC01	g__	s__	0.00464758	0.0010803	6.44516e-05	0.179603	0.000570898	0.120734	0.0511168	0.295036	847022	63.1579	1.31579
H43-bin079_1	d__Bacteria	p__Patescibacteria	c__Paceibacteria	o__UBA6257	f__2-01-FULL-56-20	g__	s__	0.00707881	0.00185261	0.000867271	0.187886	0.00198058	0.0747623	0.0457379	0.158365	687839	78.8732	0
H43-bin081_1	d__Bacteria	p__Patescibacteria	c__Paceibacteria	o__Paceibacterales	f__Staskawiczbacteraceae	g__UBA11703	s__	0.0127899	0.00234689	0.000900504	0.313375	0.000991279	0.13658	0.0778305	0.292635	754610	84.507	1.40845
H43-bin083_1	d__Archaea	p__Nanoarchaeota	c__Nanoarchaeia	o__Pacearchaeales	f__UBA73	g__UBA73	s__	0.0105138	0.00247367	0.00619673	0.18604	0.00197377	0.152924	0.0600203	0.355664	880030	61.8421	2.63158
H43-bin084_1	d__Archaea	p__Nanoarchaeota	c__Nanoarchaeia	o__Pacearchaeales	f__UBA73	g__	s__	0.000347366	5.19983e-05	2.06904e-05	0.16462	0.000174617	0.166417	0.0552719	0.438839	748836	55.2632	0
H43-bin086_1	d__Bacteria	p__Proteobacteria	c__Alphaproteobacteria	o__Sphingomonadales	f__Sphingomonadaceae	g__Sphingobium	s__Sphingobium yanoikuyae	0.0316158	0.00473726	0.00103003	0.00567121	0.00261039	0.279426	0.0541818	0.528003	4959667	98.5915	0
H43-bin087_1	d__Archaea	p__Nanoarchaeota	c__Nanoarchaeia	o__SCGC-AAA011-G17	f__GW2011-AR20	g__GW2011-AR20	s__	0.00792835	0.02314	0.0144757	0.276053	0.0150709	0.145019	0.0802811	0.272152	416017	51.3158	0
H43-bin088_1	d__Bacteria	p__Patescibacteria	c__Paceibacteria	o__Paceibacterales	f__Staskawiczbacteraceae	g__	s__	0.00986222	0.0150682	0.0404631	0.600265	0.0605185	0.229253	0.159238	0.362707	594103	78.8732	1.40845
H43-bin089_1	d__Bacteria	p__Patescibacteria	c__Paceibacteria	o__UBA6257	f__UBA9933	g__	s__	0.00578818	0.0961364	0.00819399	0.0945696	0.0627388	0.135137	0.067094	0.18626	284148	54.9296	1.40845
H43-bin091_1	d__Bacteria	p__Patescibacteria	c__Paceibacteria	o__UBA9983_A	f__UBA9973	g__UBA9973	s__	0.0145169	0.0674744	0.000849642	0.111635	0.00108708	0.0727848	0.0447246	0.142997	373902	56.338	0
H43-bin093_1	d__Bacteria	p__Patescibacteria	c__Paceibacteria	o__UBA9983_A	f__UBA2163	g__UBA10103	s__	0.0358794	0.108917	0.00289306	0.54242	0.00298522	0.147545	0.140107	0.249324	672518	63.3803	0
H43-bin094_1	d__Archaea	p__Nanoarchaeota	c__Nanoarchaeia	o__Pacearchaeales	f__GW2011-AR1	g__ASMP01	s__	0.00202302	0.00399474	0.000242874	0.0497326	0.00107047	0.0598164	0.01948	0.148243	536211	53.9474	0
H43-bin095_1	d__Bacteria	p__Patescibacteria	c__Microgenomatia	o__Levybacterales	f__UBA12049	g__	s__	0.00303489	0.00105665	0.000125053	0.0917183	0.000242545	0.0606592	0.0261394	0.146803	709822	83.0986	1.40845
H43-bin096_1	d__Bacteria	p__Patescibacteria	c__Paceibacteria	o__UBA9983_A	f__Zambryskibacteraceae	g__UBA5004	s__	0.00141732	0.021664	0.00280844	0.0684515	0.00165784	0.044689	0.023448	0.0935457	451115	63.3803	0
H43-bin096_2	d__Bacteria	p__Patescibacteria	c__Paceibacteria	o__UBA9983_A	f__Zambryskibacteraceae	g__UBA5004	s__	0.00125295	0.021852	0.00267361	0.0679858	0.00164714	0.0447873	0.0233665	0.0938779	451115	63.3803	0
H43-bin099_1	d__Bacteria	p__Planctomycetota	c__Brocadiae	o__	f__	g__	s__	0.00166896	0.000281391	0.00028211	0.25684	0.000543918	0.0262079	0.0476374	0.0768796	2092064	71.831	2.8169
H43-bin101_1	d__Bacteria	p__Chloroflexota	c__Anaerolineae	o__Anaerolineales	f__	g__	s__	0.00280591	0.0229957	0.00480526	0.251923	0.0462728	0.0356751	0.0607463	0.0732914	773150	64.7887	0
H43-bin103_1	d__Bacteria	p__Patescibacteria	c__Paceibacteria	o__UBA9983	f__UBA9983	g__UBA9983	s__	0.0102041	0.038742	0.530145	0.178416	0.0673459	0.111586	0.156073	0.149456	434014	53.5211	0
H43-bin104_1	d__Bacteria	p__Gemmatimonadota	c__Gemmatimonadetes	o__Gemmatimonadales	f__GWC2-71-9	g__	s__	0.00475279	0.109079	0.00990714	0.331566	0.0220934	0.0516768	0.0881791	0.0982532	1834736	63.3803	0
H43-bin105_1	d__Bacteria	p__Patescibacteria	c__Paceibacteria	o__UBA9983_A	f__UBA9973	g__	s__	0.0996283	0.052081	0.00707671	0.3737	0.00689449	0.0588216	0.0997004	0.109103	510745	66.1972	0
H43-bin107_1	d__Bacteria	p__Chloroflexota	c__Dehalococcoidia	o__UBA6952	f__	g__	s__	0.0510927	0.00700072	0.0161622	0.31978	0.00548591	0.0416027	0.0735207	0.0938421	1273786	54.9296	0
H43-bin109_1	d__Bacteria	p__Patescibacteria	c__Paceibacteria	o__UBA9983_A	f__UBA9973	g__UBA9973	s__	0.00557291	0.0620106	0.0335613	0.456591	0.0477602	0.079585	0.11418	0.13053	462455	74.6479	1.40845
H43-bin110_1	d__Bacteria	p__Patescibacteria	c__Paceibacteria	o__UBA9983_A	f__UBA6899	g__UBA6899	s__	0.0323332	0.0052507	0.00968935	0.268088	0.0012291	0.0328731	0.058244	0.0789355	802139	50.7042	1.40845
H43-bin111_1	d__Bacteria	p__Chloroflexota	c__Dehalococcoidia	o__JdFR-54	f__	g__	s__	0.00296345	0.00253268	0.00202682	0.19705	0.00383587	0.0211573	0.038261	0.058644	1529680	57.7465	1.40845
H43-bin112_1	d__Bacteria	p__Patescibacteria	c__ABY1	o__BM507	f__GWE2-39-37	g__	s__	0.00065359	0.00233527	0.177548	1.03194	0.0158192	0.125481	0.225629	0.30651	700322	74.6479	0
H43-bin113_1	d__Bacteria	p__Patescibacteria	c__Microgenomatia	o__UBA10105	f__UBA927	g__MFJZ01	s__	0.00035269	0.055946	0.00161477	0.545832	0.0411376	0.0693937	0.119046	0.159902	842050	76.0563	0
H43-bin115_1	d__Bacteria	p__Patescibacteria	c__Gracilibacteria	o__UBA1369	f__LOWO2-01-FULL-3	g__	s__	0.027012	0.000354803	0.000533376	0.832415	0.000958529	0.0908763	0.158692	0.247434	1413916	92.9577	1.40845
H43-bin118_1	d__Bacteria	p__Planctomycetota	c__Brocadiae	o__Brocadiales	f__Brocadiaceae	g__XYD2-FULL-41-16	s__	0.538349	0.548661	1.42457	0.463557	2.53532	0.605862	1.01939	0.754431	903225	53.5211	1.40845
H43-bin119_1	d__Bacteria	p__Methylomirabilota	c__Methylomirabilia	o__Rokubacteriales	f__GWA2-73-35	g__AR19	s__	0.49294	0.0310732	0.00456245	0.158972	0.104548	0.101027	0.148854	0.149501	1728648	52.1127	1.40845
H43-bin120_1	d__Bacteria	p__Methylomirabilota	c__Methylomirabilia	o__Rokubacteriales	f__GWA2-73-35	g__CSP1-6	s__	0.74088	0.129043	0.0288536	0.59984	0.311897	0.20762	0.336356	0.256302	2287466	84.507	1.40845
H43-bin121_1	d__Bacteria	p__Proteobacteria	c__Gammaproteobacteria	o__Burkholderiales	f__SG8-41	g__PALSA-1004	s__	0.59558	0.0635352	0.0332497	0.865117	0.107322	0.188684	0.308915	0.283827	1629328	57.7465	0
H43-bin122_1	d__Bacteria	p__Patescibacteria	c__Paceibacteria	o__UBA9983_A	f__Zambryskibacteraceae	g__UBA5004	s__	0.0112291	0.00224545	0.00143531	0.694331	0.00110063	0.461788	0.195355	1.14116	374157	63.3803	0
H43-bin123_1	d__Bacteria	p__Patescibacteria	c__Paceibacteria_A	o__Moranbacterales	f__UBA1568	g__UBA1568	s__	0.158988	0.00930987	0.00310813	0.391935	0.00211211	0.0874721	0.108821	0.121284	626165	74.6479	0
H43-bin124_1	d__Bacteria	p__Proteobacteria	c__Alphaproteobacteria	o__Reyranellales	f__Reyranellaceae	g__Reyranella	s__	0.614822	0.0777578	0.0231026	1.49369	0.0517791	0.252393	0.418924	0.451222	1712119	57.7465	0
H43-bin125_1	d__Bacteria	p__Nitrospirota	c__Thermodesulfovibrionia	o__UBA6902	f__UBA6902	g__	s__	0.00211117	0.345942	0.344596	0.178289	1.38378	0.230949	0.414278	0.406544	828679	50.7042	0
H43-bin126_1_1	d__Bacteria	p__Methylomirabilota	c__Methylomirabilia	o__Methylomirabilales	f__Methylomirabilaceae	g__	s__	0.177293	0.0628	0.0165493	0.206858	0.133918	0.0655154	0.110489	0.0749694	975649	70.4225	0
H43-bin127_1	d__Bacteria	p__Binatota	c__Binatia	o__UBA9968	f__UBA9968	g__UBA9968	s__UBA9968 sp001799045	0.0352791	0.046934	0.00748955	0.181731	0.116944	0.0412931	0.0716119	0.0577987	1935779	67.6056	0
H43-bin129_1	d__Bacteria	p__Chloroflexota	c__Anaerolineae	o__Anaerolineales	f__	g__	s__	0.0119605	0.0371154	0.026338	0.182119	0.0171729	0.0290129	0.0506198	0.0523167	2732393	54.9296	0
H43-bin133_1	d__Archaea	p__Thermoplasmatota	c__Thermoplasmata	o__RBG-16-68-12	f__RBG-16-68-12	g__RBG-16-68-12	s__	0.00410601	0.0533872	0.0233599	0.240639	0.0295871	0.0364358	0.0645857	0.0700047	1820500	77.6316	0
H43-bin135_1	d__Archaea	p__Nanoarchaeota	c__Nanoarchaeia	o__Woesearchaeales	f__GW2011-AR4	g__GCA-2688775	s__	0.0690215	0.034515	0.149356	0.575128	0.0762392	0.101289	0.167591	0.163007	1438295	71.0526	2.63158
H43-bin137_1	d__Bacteria	p__Patescibacteria	c__Paceibacteria	o__Sungbacterales	f__	g__	s__	0.00350297	0.029292	0.0110115	0.226303	0.0301696	0.0725581	0.0621395	0.10179	467050	50.7042	2.8169
H43-bin138_1	d__Bacteria	p__Patescibacteria	c__Paceibacteria	o__Paceibacterales	f__Staskawiczbacteraceae	g__GWA2-37-10	s__	0.00226913	0.0591387	0.0167879	0.389491	0.0190922	0.191465	0.113041	0.354394	580099	70.4225	0
H43-bin140_1	d__Bacteria	p__Patescibacteria	c__Paceibacteria	o__UBA9983_A	f__UBA9973	g__UBA9973	s__	0.00974691	0.00136076	0.00125804	0.40612	0.00138062	0.165969	0.0976393	0.372348	496714	53.5211	4.22535
H43-bin141_1	d__Bacteria	p__Bacteroidota	c__Bacteroidia	o__Cytophagales	f__Spirosomaceae	g__UBA6715	s__	0.221944	0.000171661	0.100677	0.368546	0.0405584	0.079861	0.135293	0.116438	1768748	78.8732	0
H43-bin143_1	d__Bacteria	p__Methylomirabilota	c__Methylomirabilia	o__Methylomirabilales	f__2-02-FULL-66-22	g__2-02-FULL-66-22	s__2-02-FULL-66-22 sp001771285	0.0637766	0.0571278	0.0104049	0.241044	0.132268	0.0531827	0.0929674	0.0742503	3013031	78.8732	1.40845
H43-bin145_1	d__Bacteria	p__Patescibacteria	c__Paceibacteria	o__Paceibacterales	f__Staskawiczbacteraceae	g__	s__	0.00309576	0.00134408	0.00264967	0.521919	0.0035902	0.0960502	0.104775	0.186371	682240	77.4648	1.40845
H43-bin147_1	d__Bacteria	p__Patescibacteria	c__ABY1	o__UBA2591	f__PGYQ01	g__PGYQ01	s__	0.00521467	0.00614745	0.570552	1.45787	0.0100586	0.209863	0.376617	0.448517	723049	84.507	1.40845
H43-bin151_1	d__Bacteria	p__Desulfobacterota	c__Syntrophia	o__Syntrophales	f__UBA5619	g__UBA5619	s__UBA5619 sp001830835	0.00310932	0.0022055	0.0152046	0.226668	0.0153438	0.0270459	0.0482628	0.0667528	1913825	70.4225	1.40845
H43-bin153_1	d__Bacteria	p__Acidobacteriota	c__Acidobacteriae	o__Bryobacterales	f__Bryobacteraceae	g__	s__	0.00384612	0.00197171	0.00375432	0.356195	0.00293471	0.0373137	0.0676693	0.106302	5176588	52.1127	1.40845
H43-bin155	d__Bacteria	p__Patescibacteria	c__ABY1	o__Magasanikbacterales	f__UBA10003	g__UBA10003	s__	0.000390295	0.0376188	0.0201977	0.278805	0.0872771	0.0548054	0.0798491	0.0803311	656466	60.5634	0
H43-bin159_1	d__Archaea	p__Nanoarchaeota	c__Nanoarchaeia	o__Woesearchaeales	f__	g__	s__	0.00146403	0.000666846	0.000790374	0.335791	0.0016572	0.0387076	0.0631795	0.0998873	1567515	81.5789	0
H43-bin161_1	d__Bacteria	p__Patescibacteria	c__Paceibacteria	o__Paceibacterales	f__CG1-02-41-26	g__CG1-02-41-26	s__	0.000211963	0.000414245	0.0016641	0.244373	0.000293002	0.026307	0.0455439	0.0728283	681037	66.1972	1.40845
H43-bin162_1	d__Bacteria	p__Bdellovibrionota	c__Bacteriovoracia	o__UBA1018	f__UBA1018	g__	s__	0.00913455	0.000228532	0.000468608	0.350403	0.0003922	0.03652	0.0661911	0.104661	3031040	84.507	1.40845
H43-bin163_1	d__Bacteria	p__Patescibacteria	c__UBA1384	o__XYA2-FULL-43-10	f__XYA2-FULL-43-10	g__	s__	0.00179935	0.00112819	0.000451893	0.803625	0.00171117	0.136857	0.157595	0.276616	878102	81.6901	0
H43-bin164_1	d__Archaea	p__Micrarchaeota	c__Micrarchaeia	o__UBA8480	f__	g__	s__	0.000601054	0.00863638	0.0159927	0.408652	0.00578345	0.0490118	0.0814463	0.120676	1635789	90.7895	1.31579
H43-bin165_1	d__Archaea	p__Crenarchaeota	c__Nitrososphaeria	o__Nitrososphaerales	f__Nitrosopumilaceae	g__Nitrosoarchaeum	s__	0.211387	0.0617435	1.38383	2.47846	0.29061	0.467686	0.815621	0.776061	1205914	89.4737	1.31579
H43-bin166_1	d__Bacteria	p__Patescibacteria	c__Paceibacteria_A	o__Moranbacterales	f__UBA1568	g__UBA1568	s__	0.1362	0.00970848	0.00293033	0.359847	0.00205402	0.0782789	0.0981699	0.110076	541196	66.1972	0
H43-bin167_1	d__Bacteria	p__Chloroflexota	c__Anaerolineae	o__Anaerolineales	f__	g__	s__	0.013496	0.0432242	0.0279578	0.191763	0.0198402	0.0314425	0.0546206	0.0550238	2441179	76.0563	0
H43-bin168_1	d__Bacteria	p__Patescibacteria	c__Paceibacteria	o__UBA9983_A	f__UBA9973	g__UBA9973	s__	0.0348203	0.0124491	0.0343818	0.519661	0.00640527	0.145829	0.125591	0.25161	595924	81.6901	2.8169
H43-bin170_1	d__Bacteria	p__Patescibacteria	c__Paceibacteria	o__UBA9983_A	f__UBA2163	g__C7867-001	s__	0.00350462	0.000847696	0.000122846	0.197185	0.000227607	0.0483064	0.041699	0.0947244	539001	56.338	0
H43-bin171_1	d__Bacteria	p__Patescibacteria	c__ABY1	o__UBA10025	f__PEXW01	g__	s__	0.00140705	0.103213	0.00201835	0.192795	0.0204652	0.0350067	0.0591508	0.0603985	768089	67.6056	0
H43-bin172_1	d__Bacteria	p__RBG-13-66-14	c__	o__	f__	g__	s__	0.0027004	0.000744551	0.00037575	1.40792	0.00094527	0.16717	0.263309	0.420448	4681141	100	0
H43-bin173_1	d__Bacteria	p__Bacteroidota	c__UBA10030	o__	f__	g__	s__	0.00324447	0.0149125	0.0124324	0.263577	0.0567746	0.0356098	0.0644251	0.0777248	2580239	63.3803	0
H43-bin174_1	d__Bacteria	p__Patescibacteria	c__Paceibacteria	o__UBA6257	f__GWB1-50-10	g__	s__	0.00237764	0.00129881	0.000577391	0.446924	0.00123516	0.235643	0.114676	0.566878	590159	64.7887	0
H43-bin175_1	d__Bacteria	p__Patescibacteria	c__ABY1	o__UBA2591	f__PGYQ01	g__PGYQ01	s__	0.00104035	0.000868176	0.179292	0.452562	0.00158532	0.0654137	0.116794	0.139401	596184	67.6056	0
H43-bin177_1	d__Bacteria	p__Patescibacteria	c__Paceibacteria	o__Paceibacterales	f__CG1-02-41-26	g__	s__	0.000800076	0.0031896	0.00825038	0.602888	0.000584777	0.0692549	0.114161	0.179148	544951	54.9296	0
H43-bin178_1	d__Bacteria	p__UBA9089	c__UBA9088	o__UBA9088	f__	g__	s__	0.000233402	0.000677419	0.00451435	0.287811	0.000928429	0.0307096	0.0541456	0.085757	1855096	56.338	1.40845
H43-bin179_1	d__Archaea	p__Aenigmarchaeota	c__Aenigmarchaeia	o__GW2011-AR5	f__GW2011-AR5	g__GW2011-AR5	s__	0.00295669	0.0175884	0.0179934	0.702833	0.0563476	0.0880023	0.14762	0.206188	909773	56.5789	0
H43-bin180	d__Bacteria	p__Patescibacteria	c__Paceibacteria	o__Paceibacterales	f__CG1-02-41-26	g__CG1-02-41-26	s__	0.00123586	0.00175279	0.00354242	0.268665	0.00261928	0.0301705	0.051331	0.079732	855414	60.5634	5.6338
H43-bin181_1	d__Bacteria	p__Patescibacteria	c__Gracilibacteria	o__UBA1369	f__2-02-FULL-48-14	g__2-02-FULL-48-14	s__	0.011524	0.0063762	0.0101249	0.887991	0.211899	0.129839	0.209626	0.260585	1301131	87.3239	0
H43-bin182_1	d__Bacteria	p__Patescibacteria	c__Paceibacteria	o__Portnoybacterales	f__GWB1-42-6	g__UBA8475	s__	0.000431686	0.00169421	0.000789389	0.24858	0.000614561	0.0359622	0.0480121	0.0774908	551827	56.338	2.8169
H43-bin183_1	d__Bacteria	p__Patescibacteria	c__UBA1384	o__2-12-FULL-50-11	f__2-12-FULL-50-11	g__	s__	0.00100479	0.00714009	0.000332653	1.41779	0.000952842	0.601015	0.338039	1.38425	788456	76.0563	1.40845
H43-bin184_1	d__Bacteria	p__Poribacteria	c__	o__	f__	g__	s__	0.000398883	0.000165759	0.00103776	0.388342	0.000344903	0.0396455	0.0716557	0.116244	5503102	74.6479	2.8169
H43-bin185_1	d__Bacteria	p__Patescibacteria	c__Paceibacteria	o__UBA6257	f__HR35	g__LCBW01	s__	0.00353916	0.00538167	0.036025	0.348298	0.0103142	0.131145	0.0891172	0.213043	581026	67.6056	0
H43-bin186_1	d__Bacteria	p__Patescibacteria	c__ABY1	o__UBA9629	f__UBA9629	g__	s__	0.000716856	0.0120461	0.0213566	0.517144	0.014243	0.057279	0.103798	0.153446	811911	73.2394	0
H43-bin187_1	d__Bacteria	p__Patescibacteria	c__ABY1	o__SG8-24	f__	g__	s__	0.00100251	0.00159385	0.232469	0.509742	0.010264	0.0788328	0.138984	0.158867	774633	85.9155	1.40845
H43-bin188_1	d__Bacteria	p__Patescibacteria	c__ABY1	o__Magasanikbacterales	f__GWA2-37-8	g__XYD2-FULL-39-9	s__	0.00156284	0.0030143	0.0020646	0.452598	0.00108761	0.0918266	0.0920256	0.180281	769147	77.4648	1.40845
H43-bin189_1	d__Bacteria	p__Patescibacteria	c__Paceibacteria	o__GWC2-36-17_A	f__UBA10092	g__UBA10092	s__	0.0842896	0.132118	0.0162073	0.282545	0.0265968	0.354658	0.149402	0.530148	248422	50.7042	0
H43-bin190_1	d__Bacteria	p__Patescibacteria	c__Paceibacteria	o__UBA9983_A	f__UBA11359_A	g__2-02-FULL-44-35	s__	0.0492166	0.0966247	0.0331444	0.186319	0.058979	0.113926	0.0897016	0.0946519	457640	67.6056	0
H43-bin191_1	d__Bacteria	p__Nitrospirota	c__Nitrospiria	o__Nitrospirales	f__Nitrospiraceae	g__Palsa-1315	s__	0.0431619	0.181555	0.160944	0.839388	0.142318	0.149753	0.252853	0.239052	433813	53.5211	0
H43-bin192_1	d__Bacteria	p__Acidobacteriota	c__Acidobacteriae	o__UBA7541	f__UBA7541	g__	s__	0.356504	0.132583	0.0596954	0.286765	0.252054	0.121023	0.201437	0.126436	743692	53.5211	0
H43-bin194_1	d__Bacteria	p__Nitrospirota	c__Thermodesulfovibrionia	o__UBA6902	f__UBA6902	g__	s__	0.0119101	0.303816	0.300802	0.163473	1.30065	0.214145	0.382465	0.37999	737173	53.5211	0
H43-bin195_1	d__Bacteria	p__Methylomirabilota	c__Methylomirabilia	o__Methylomirabilales	f__Methylomirabilaceae	g__	s__	0.214218	0.0791221	0.0190484	0.283745	0.170965	0.0844705	0.141928	0.0978906	1799363	74.6479	0
H43-bin196_1	d__Bacteria	p__Binatota	c__Binatia	o__UBA9968	f__UBA9968	g__UBA9968	s__UBA9968 sp001799045	0.0381174	0.0447818	0.00734295	0.174762	0.115966	0.0406217	0.0702652	0.0559301	2026931	69.0141	0
H43-bin198_1	d__Bacteria	p__Chloroflexota_A	c__Ellin6529	o__P2-11E	f__P2-11E	g__	s__	0.157349	0.0716117	0.0222289	0.121182	0.0197379	0.0437699	0.0726466	0.0529105	1152289	50.7042	1.40845
H43-bin200_1	d__Archaea	p__Nanoarchaeota	c__Nanoarchaeia	o__Woesearchaeales	f__GW2011-AR4	g__GCA-2688775	s__	0.106796	0.0408421	0.0120382	0.836303	0.0520514	0.125645	0.195613	0.241646	872458	57.8947	1.31579
H43-bin201_1	d__Bacteria	p__Patescibacteria	c__Paceibacteria	o__UBA9983_A	f__UBA11359	g__C7867-002	s__	0.00110642	0.0218718	0.033164	1.41615	0.00466672	0.443784	0.320123	0.915348	532814	60.5634	0
H43-bin203_1	d__Bacteria	p__Omnitrophota	c__koll11	o__GIF10	f__UBA12090	g__UBA12090	s__	0.0146337	0.035574	0.016568	0.204831	0.0755738	0.0379347	0.0641859	0.0594194	1363424	64.7887	1.40845
H43-bin205_1	d__Bacteria	p__Chloroflexota	c__Anaerolineae	o__Anaerolineales	f__	g__	s__	0.0042145	0.0321112	0.00713376	0.35301	0.0677734	0.0503478	0.0857651	0.102715	1771715	71.831	0
H43-bin206_1	d__Bacteria	p__Patescibacteria	c__Microgenomatia	o__GWA2-44-7	f__Amesbacteraceae	g__	s__	0.000464651	0.104799	0.00978454	0.249418	0.00341713	0.164578	0.0887436	0.3301	597306	64.7887	0
H43-bin207_1	d__Bacteria	p__Acidobacteriota	c__Vicinamibacteria	o__Vicinamibacterales	f__	g__	s__	0.0118114	0.0776753	0.0220833	0.42856	0.0323345	0.0591149	0.105263	0.125123	2412281	73.2394	0
H43-bin209_1	d__Bacteria	p__Actinobacteriota	c__Actinobacteria	o__Actinomycetales	f__Microbacteriaceae	g__Aurantimicrobium	s__Aurantimicrobium sp003194085	0.00375427	0.000237977	0.00916294	0.225954	0.000587821	0.0253706	0.0441779	0.0669404	957415	53.5211	0
H43-bin210_1	d__Bacteria	p__Patescibacteria	c__Paceibacteria	o__UBA6257	f__2-01-FULL-56-20	g__	s__	0.00718432	0.00171203	0.000517454	0.398904	0.00172142	0.154051	0.094015	0.338302	771694	56.338	0
H43-bin211_1	d__Bacteria	p__Patescibacteria	c__Microgenomatia	o__UBA1400	f__UBA12028	g__UBA12028	s__	0.00092135	0.0691145	0.00158085	0.285971	0.00220364	0.0521153	0.0686511	0.0869468	745361	69.0141	0
H43-bin212_1	d__Bacteria	p__Acidobacteriota	c__Acidobacteriae	o__Bryobacterales	f__Bryobacteraceae	g__	s__	0.00553979	0.0111751	0.0375544	3.8269	0.0304564	0.393961	0.717598	1.14438	7353821	94.3662	2.8169
H43-bin213_1	d__Archaea	p__Nanoarchaeota	c__Nanoarchaeia	o__Pacearchaeales	f__UBA73	g__UBA73	s__	0.00457422	0.0884957	0.00630605	0.554355	0.0169813	0.0911762	0.126981	0.168161	1039983	52.6316	0
H43-bin214_1	d__Bacteria	p__Planctomycetota	c__Phycisphaerae	o__Phycisphaerales	f__SM1A02	g__UBA2396	s__	0.00824515	0.000439009	0.0290501	0.412393	0.0425144	0.0513182	0.09066	0.12108	4056197	85.9155	0
H43-bin215_1	d__Bacteria	p__MBNT15	c__MBNT15	o__MBNT15	f__MBNT15	g__	s__	0.00191985	0.0250763	0.0274199	0.693988	0.00890936	0.0766007	0.138986	0.206017	1980426	85.9155	0
H43-bin216_1	d__Bacteria	p__Campylobacterota	c__Campylobacteria	o__Campylobacterales	f__Sulfurimonadaceae	g__Sulfurimonas	s__	0.0479802	6.88458e-05	0.00124715	0.277467	0.0197492	0.0373273	0.0639733	0.0814765	1870034	87.3239	1.40845
H43-bin217_1	d__Bacteria	p__Patescibacteria	c__Microgenomatia	o__Levybacterales	f__	g__	s__	0.000180654	0.0605233	0.00636098	0.278928	0.00737022	0.0581918	0.0685925	0.0967025	629310	57.7465	0
H43-bin218	d__Bacteria	p__Patescibacteria	c__ABY1	o__SG8-24	f__GCA-002772895	g__	s__	0.000466794	0.00386425	0.0584903	0.318893	0.0013483	0.0397909	0.0704757	0.0945553	953987	70.4225	1.40845
H43-bin219	d__Bacteria	p__Bacteroidota	c__UBA10030	o__UBA10030	f__UBA6906	g__UBA11986	s__	0.00189682	0.00734577	0.00406147	0.165679	0.0164691	0.0199868	0.0359065	0.0487933	3308023	52.1127	4.22535
H43-bin220_1	d__Bacteria	p__Patescibacteria	c__Paceibacteria	o__UBA9983_A	f__UBA2163	g__UBA10103	s__	0.00276247	0.00431655	0.0010518	0.34842	0.000873104	0.0401072	0.0662551	0.103423	846444	56.338	0
H43-bin221_1	d__Bacteria	p__Desulfobacterota	c__Syntrophia	o__Syntrophales	f__UBA5619	g__UBA5619	s__UBA5619 sp001830835	0.00276916	0.00207616	0.0148843	0.223122	0.0181982	0.0268351	0.0479809	0.0656953	1976297	76.0563	2.8169
H43-bin222_1	d__Bacteria	p__Omnitrophota	c__koll11	o__UBA10183	f__UBA10183	g__	s__	0.000908814	0.0114861	0.0509142	1.44332	0.0275923	0.154985	0.281535	0.429717	1366481	71.831	0
H43-bin225_1	d__Bacteria	p__Planctomycetota	c__Phycisphaerae	o__SG8-4	f__SG8-4	g__SG8-4	s__	0.00609236	0.00211143	0.0042269	0.570511	0.00396011	0.059422	0.107721	0.170374	4788443	60.5634	0
H43-bin226_1	d__Bacteria	p__Bacteroidota	c__UBA10030	o__UBA10030	f__UBA10030	g__	s__	0.000685081	0.0103255	0.0109598	0.422674	0.00854716	0.0459443	0.0831892	0.125642	3007893	84.507	1.40845
H43-bin227_1	d__Archaea	p__Nanoarchaeota	c__Nanoarchaeia	o__Pacearchaeales	f__UBA73	g__UBA73	s__	0.00065837	0.000455656	0.000255661	0.528277	0.000335618	0.105723	0.105951	0.209289	1197661	61.8421	2.63158
H43-bin228_1	d__Bacteria	p__Margulisbacteria	c__GWF2-35-9	o__GWF2-35-9	f__GWF2-35-9	g__	s__	0.000250321	0.000690884	0.0104301	0.258318	0.00198141	0.0278332	0.0499174	0.0768842	1512948	50.7042	1.40845
H43-bin229_1	d__Bacteria	p__Patescibacteria	c__ABY1	o__BM507	f__GWE2-39-37	g__	s__	0.000626125	0.00123185	0.0141605	0.386583	0.00250389	0.0418273	0.0744888	0.115015	709550	67.6056	0
H43-bin231_1	d__Bacteria	p__Patescibacteria	c__Gracilibacteria	o__Peribacterales	f__Peribacteraceae	g__	s__	0.00668953	0.00019999	0.000114065	0.304427	0.000271698	0.0322867	0.0573315	0.0907544	1073578	57.7465	0
H43-bin233_1	d__Bacteria	p__Patescibacteria	c__Gracilibacteria	o__UBA1369	f__UM-FILTER-53-11	g__	s__	0.00265076	0.0107659	0.00302191	0.363843	0.00344515	0.0488756	0.0721003	0.108971	1132607	76.0563	2.8169
H43-bin234_1	d__Bacteria	p__Proteobacteria	c__Alphaproteobacteria	o__Rickettsiales	f__	g__	s__	0.000503891	0.000266743	0.00038009	0.331783	0.000156799	0.0338998	0.0611651	0.0993072	1287735	73.2394	0
H43-bin236_1	d__Bacteria	p__Verrucomicrobiota	c__Verrucomicrobiae	o__Pedosphaerales	f__	g__	s__	0.0139094	0.0304558	0.0150426	0.555838	0.0858544	0.0720383	0.128856	0.163058	3571050	69.0141	2.8169
H43-bin237_1	d__Archaea	p__Micrarchaeota	c__Micrarchaeia	o__UBA8480	f__UBA97	g__	s__	0.000194924	0.00263101	0.00566863	0.651587	0.00595237	0.068207	0.122373	0.194502	839931	67.1053	0
H43-bin239_1	d__Bacteria	p__Patescibacteria	c__ABY1	o__SG8-24	f__GWF2-40-263	g__	s__	0.00350793	0.00026502	0.000974679	0.915092	0.00524613	0.0943209	0.169901	0.273623	768525	87.3239	1.40845
H43-bin240_1	d__Archaea	p__Iainarchaeota	c__Iainarchaeia	o__	f__	g__	s__	5.15027e-05	3.9627e-05	2.2149e-05	0.46022	5.99366e-05	0.0498714	0.0850441	0.137251	1083416	78.9474	2.63158
H51-bin001_1	d__Bacteria	p__Patescibacteria	c__Paceibacteria	o__UBA6257	f__2-01-FULL-56-20	g__	s__	0.0260579	0.0126441	0.00721933	0.010135	0.148976	0.153232	0.0597106	0.369905	529206	64.7887	0
H51-bin002_1	d__Bacteria	p__Patescibacteria	c__Paceibacteria	o__UBA6257	f__2-01-FULL-56-20	g__	s__	0.00336508	0.0018868	0.000530422	0.0012154	0.0205972	0.0211409	0.00812264	0.0474455	581034	56.338	4.22535
H51-bin003_1	d__Bacteria	p__Patescibacteria	c__Paceibacteria	o__Ryanbacterales	f__GWA2-47-10b	g__GWA2-47-10b	s__	0.0059083	0.0020614	0.00128374	0.00191957	0.0400373	0.0467872	0.0163329	0.116391	805265	76.0563	0
H51-bin004_1	d__Bacteria	p__Patescibacteria	c__Paceibacteria	o__2-02-FULL-40-12	f__	g__	s__	0.0114085	0.00106393	0.000702839	0.00142342	0.0186294	0.0370097	0.0117063	0.0848416	547458	67.6056	0
H51-bin005_1	d__Bacteria	p__Patescibacteria	c__Paceibacteria	o__UBA6257	f__2-01-FULL-56-20	g__	s__	0.00398458	0.0741643	0.0243526	0.00163762	0.0265796	0.0470651	0.0296306	0.061259	644372	67.6056	0
H51-bin006_1	d__Bacteria	p__Patescibacteria	c__Paceibacteria	o__2-02-FULL-40-12	f__IGHO2-01-FULL-4-A	g__	s__	0.00995155	0.012787	0.00274151	0.00149472	0.0553833	0.0372975	0.0199426	0.0769815	743627	76.0563	0
H51-bin007_1	d__Bacteria	p__Patescibacteria	c__Paceibacteria	o__UBA9983_A	f__UBA2163	g__	s__	0.0407198	0.0037239	0.0207639	0.00696744	0.182528	0.0904623	0.0575276	0.155318	1121225	85.9155	1.40845
H51-bin008_1	d__Bacteria	p__Gemmatimonadota	c__Gemmatimonadetes	o__Gemmatimonadales	f__Gemmatimonadaceae	g__	s__	0.011498	0.00677639	0.00310517	0.00126558	0.137406	0.0747788	0.0391383	0.155212	3014311	90.1408	0
H51-bin009_1	d__Archaea	p__Nanoarchaeota	c__Nanoarchaeia	o__UBA10117	f__UBA10117	g__	s__	3.55951e-05	0.0001145	1.2244e-05	0.000175196	0.0136766	0.018881	0.00548253	0.0512706	439242	57.8947	0
H51-bin010_1	d__Bacteria	p__Patescibacteria	c__Paceibacteria	o__2-02-FULL-40-12	f__2-02-FULL-40-12	g__2-02-FULL-40-12	s__	0.023336	0.00923196	0.00246646	0.0083186	0.0508574	0.0605021	0.0257854	0.126928	395389	63.3803	0
H51-bin011_1	d__Bacteria	p__Patescibacteria	c__Paceibacteria	o__UBA6257	f__UBA9933	g__	s__	0.00464844	0.0440214	0.0154015	0.00432643	0.0920982	0.146824	0.05122	0.315334	399220	69.0141	0
H51-bin014_1	d__Bacteria	p__Proteobacteria	c__Gammaproteobacteria	o__Acidiferrobacterales	f__Sulfurifustaceae	g__	s__	0.153271	0.92017	0.119425	0.0276041	0.983451	0.402331	0.434375	0.411277	1125845	57.7465	0
H51-bin019_1	d__Bacteria	p__Patescibacteria	c__Paceibacteria	o__Sungbacterales	f__HO2-52-23	g__	s__	0.201964	0.325134	0.010702	0.0026549	0.145554	0.107613	0.13227	0.113358	749533	57.7465	1.40845
H51-bin020_1	d__Archaea	p__Nanoarchaeota	c__Nanoarchaeia	o__Pacearchaeales	f__UBA73	g__1-14-0-10-34-76	s__	0.00387231	0.115512	0.0144839	0.000726301	0.00837317	0.0557114	0.0331131	0.0690151	837412	56.5789	0
H51-bin021_1	d__Bacteria	p__Patescibacteria	c__Paceibacteria	o__2-02-FULL-40-12	f__2-02-FULL-40-12	g__2-02-FULL-40-12	s__	0.0511305	0.0520759	0.0101276	0.00795065	0.155217	0.136682	0.068864	0.264744	514712	69.0141	0
H51-bin024_1	d__Bacteria	p__Patescibacteria	c__Paceibacteria	o__2-02-FULL-40-12	f__GWA2-44-9	g__2-01-FULL-41-21	s__	0.000942892	0.0443208	0.0328847	0.265275	0.0197536	0.211023	0.0957001	0.298107	388268	56.338	0
H51-bin025_1	d__Archaea	p__Nanoarchaeota	c__Nanoarchaeia	o__Woesearchaeales	f__GW2011-AR9	g__UBA10204	s__	0.113909	0.202459	0.0249464	0.00825229	0.173694	0.0935498	0.102802	0.0962424	967067	59.2105	2.63158
H51-bin026_1	d__Bacteria	p__Patescibacteria	c__Paceibacteria	o__UBA9983_A	f__Zambryskibacteraceae	g__UBA5004	s__	0.0164122	0.0450327	0.00846353	0.0350826	0.0667697	0.0865021	0.0430438	0.122567	377393	56.338	0
H51-bin027	d__Archaea	p__Nanoarchaeota	c__Nanoarchaeia	o__SCGC-AAA011-G17	f__	g__	s__	0.0245761	0.0116154	0.00284505	0.00592291	0.0566987	0.0530786	0.0257895	0.0970999	1477234	67.1053	5.26316
H51-bin028_1	d__Bacteria	p__Patescibacteria	c__Paceibacteria	o__UBA9983_A	f__UBA2163	g__	s__	0.02355	0.00123585	0.00934692	0.00219366	0.0545873	0.0461726	0.0228477	0.0614118	542974	53.5211	0
H51-bin029_1	d__Bacteria	p__Patescibacteria	c__Paceibacteria	o__UBA6257	f__WO2-44-18	g__2011-GWA2-47-8b	s__	0.0100019	0.00293695	0.0265027	0.00149295	0.144353	0.0693002	0.0424313	0.129354	888718	77.4648	0
H51-bin030_1	d__Bacteria	p__Patescibacteria	c__Paceibacteria	o__2-02-FULL-40-12	f__2-02-FULL-40-12	g__2-02-FULL-40-12	s__	0.0270184	0.00714534	0.00197728	0.00617012	0.268891	0.146208	0.076235	0.319234	510672	61.9718	0
H51-bin031_1	d__Bacteria	p__Patescibacteria	c__Saccharimonadia	o__Saccharimonadales	f__2-12-FULL-41-12	g__2-12-FULL-41-12	s__	0.0693518	0.0023086	0.00141087	0.0366858	0.1988	0.111023	0.06993	0.187273	809937	85.9155	1.40845
H51-bin032_1	d__Bacteria	p__Patescibacteria	c__Paceibacteria	o__Paceibacterales	f__UBA10102	g__O2-01-FULL-48-27b	s__	0.0121196	0.0024628	0.000189224	0.000192363	0.0289896	0.0283178	0.0120452	0.0618888	537985	69.0141	0
H51-bin033_1	d__Bacteria	p__Patescibacteria	c__Paceibacteria	o__UBA9983	f__	g__	s__	0.00440971	0.105214	0.000846222	0.0014398	0.262496	0.114492	0.0814831	0.226022	252789	54.9296	0
H51-bin036_1	d__Archaea	p__Nanoarchaeota	c__Nanoarchaeia	o__Pacearchaeales	f__	g__	s__	0.00309099	0.0869383	0.0180372	0.00363747	0.141698	0.133547	0.0644914	0.290283	725140	56.5789	1.31579
H51-bin037_1	d__Archaea	p__Nanoarchaeota	c__Nanoarchaeia	o__SCGC-AAA011-G17	f__GW2011-AR20	g__	s__	0.0049927	0.00796681	0.00217686	0.00546836	0.0299677	0.0370778	0.0146084	0.0768947	805271	64.4737	1.31579
H51-bin038_1	d__Bacteria	p__Patescibacteria	c__Paceibacteria	o__Paceibacterales	f__Staskawiczbacteraceae	g__	s__	0.00665286	0.00145654	0.0289939	0.000756172	0.170464	0.0997204	0.0513406	0.204943	692390	81.6901	1.40845
H51-bin041_1	d__Bacteria	p__Patescibacteria	c__Paceibacteria	o__UBA9983_A	f__UBA2163	g__UBA10103	s__	0.00442569	0.000122753	4.23863e-05	0.00061401	0.0702942	0.0356445	0.0185239	0.0801612	815065	77.4648	0
H51-bin042_1	d__Bacteria	p__Patescibacteria	c__Paceibacteria	o__Sungbacterales	f__HO2-52-23	g__WO2-54-10	s__	0.0211956	0.131965	0.0167111	0.00251159	0.625166	0.134684	0.155372	0.222968	770948	74.6479	0
H51-bin043_1	d__Bacteria	p__Patescibacteria	c__Paceibacteria	o__UBA9983_A	f__UBA11359	g__UBA6065	s__	0.00209017	0.0626035	0.00143093	0.0026859	0.0619566	0.0425641	0.0288885	0.0754781	611083	74.6479	0
H51-bin046_1	d__Bacteria	p__Patescibacteria	c__Paceibacteria	o__2-02-FULL-40-12	f__IGHO2-01-FULL-4-A	g__	s__	0.00962565	0.00167613	0.000305399	0.00167564	0.0511537	0.0496999	0.0190227	0.120037	750809	81.6901	1.40845
H51-bin047_1	d__Bacteria	p__Patescibacteria	c__Paceibacteria	o__UBA6257	f__1-14-0-10-40-38	g__	s__	0.00219567	0.00542808	0.000279355	0.000653732	0.0378747	0.0257527	0.0120307	0.0585702	771529	77.4648	0
H51-bin048_1	d__Bacteria	p__Patescibacteria	c__Microgenomatia	o__Daviesbacterales	f__UBA10151	g__UBA9644	s__	0.00992508	0.0076534	0.00678225	0.00115246	0.0532327	0.0466213	0.0208945	0.100715	1007788	81.6901	1.40845
H51-bin050_1	d__Bacteria	p__Patescibacteria	c__Paceibacteria	o__UBA9983_A	f__UBA9988	g__	s__	0.0137233	0.00296185	0.000504229	0.00262605	0.0899371	0.0569409	0.0277822	0.125901	639780	69.0141	0
H51-bin051	d__Bacteria	p__Patescibacteria	c__Paceibacteria	o__UBA9983_A	f__UBA2163	g__	s__	0.00138314	0.00805238	0.0086588	0.000812077	0.0517723	0.0433406	0.0190032	0.0916435	642262	69.0141	0
H51-bin052_1	d__Archaea	p__Nanoarchaeota	c__Nanoarchaeia	o__SCGC-AAA011-G17	f__GW2011-AR18	g__	s__	0.00616551	0.0383956	0.0201103	0.000320558	0.0494271	0.0533724	0.0279652	0.0970373	791382	71.0526	2.63158
H51-bin053_1	d__Bacteria	p__Patescibacteria	c__Microgenomatia	o__GWA2-44-7	f__UBA10165	g__2-12-FULL-44-25	s__	0.00188323	0.0326918	0.00055702	0.0018816	0.0343998	0.0342036	0.0176029	0.0744981	674930	69.0141	0
H51-bin054_1	d__Bacteria	p__Patescibacteria	c__Paceibacteria	o__2-02-FULL-40-12	f__	g__	s__	0.0014622	0.0400237	0.00388884	0.00316147	0.111737	0.0451161	0.0342316	0.0846336	710559	71.831	1.40845
H51-bin055_1	d__Bacteria	p__Patescibacteria	c__Paceibacteria	o__Paceibacterales	f__2-12-FULL-40-12	g__	s__	0.00606461	0.0637433	0.00187341	0.000776943	0.0452238	0.0663839	0.0306777	0.146591	433136	73.2394	1.40845
H51-bin058_1	d__Bacteria	p__Patescibacteria	c__Paceibacteria	o__UBA9983_A	f__	g__	s__	0.000788767	0.00269555	3.37906e-05	0.000148752	0.0249926	0.0224735	0.00852216	0.0576309	515502	67.6056	0
H51-bin059_1	d__Bacteria	p__Patescibacteria	c__Paceibacteria	o__UBA9983_A	f__UBA11359_A	g__2-02-FULL-44-35	s__	0.0436235	0.0715277	0.0253738	0.112638	0.0560455	0.0871029	0.0660519	0.0653137	367746	50.7042	0
H51-bin060_1	d__Bacteria	p__Actinobacteriota	c__Actinobacteria	o__Propionibacteriales	f__Propionibacteriaceae	g__Cutibacterium	s__Cutibacterium acnes	0.0202443	0.00272431	0.00302347	0.0359146	0.0502789	0.238687	0.0584788	0.535597	2236306	91.5493	1.40845
H51-bin061_1	d__Bacteria	p__Bacteroidota	c__UBA10030	o__UBA10030	f__UBA10030	g__	s__	0.0629812	0.00677956	0.00998825	0.00315614	0.0276811	0.170358	0.046824	0.356721	1811734	71.831	0
H51-bin062_1	d__Bacteria	p__Patescibacteria	c__Paceibacteria	o__2-02-FULL-40-12	f__	g__	s__	0.641974	0.144691	0.0145288	0.00969002	0.0975196	0.208667	0.186178	0.265414	438654	53.5211	1.40845
H51-bin064_1	d__Archaea	p__Nanoarchaeota	c__Nanoarchaeia	o__SCGC-AAA011-G17	f__GW2011-AR20	g__GW2011-AR20	s__	0.482648	0.0287943	0.00940056	0.0115429	0.0799866	0.228687	0.140177	0.352512	552035	56.5789	0
H51-bin067_1	d__Bacteria	p__Proteobacteria	c__Gammaproteobacteria	o__Acidiferrobacterales	f__Sulfurifustaceae	g__SM1-46	s__	0.0211614	0.228296	0.0057435	0.00299448	0.105889	0.13443	0.0830857	0.241359	1750146	83.0986	0
H51-bin069_1	d__Bacteria	p__Patescibacteria	c__Microgenomatia	o__GWA2-44-7	f__UBA8517	g__	s__	0.00689832	0.100773	0.125343	0.00836822	0.00724064	0.295019	0.0906071	0.468264	543380	67.6056	0
H51-bin070_1	d__Bacteria	p__Patescibacteria	c__Paceibacteria	o__2-02-FULL-40-12	f__2-02-FULL-40-12	g__2-02-FULL-40-12	s__	0.046556	0.0204444	0.00779631	0.00140614	0.0244616	0.0852935	0.030993	0.122957	368131	60.5634	0
H51-bin071_1	d__Bacteria	p__Patescibacteria	c__Paceibacteria	o__Sungbacterales	f__	g__	s__	0.346761	0.16031	0.0147776	0.00311177	0.0960925	0.109891	0.121824	0.119699	338344	57.7465	0
H51-bin072_1	d__Bacteria	p__Patescibacteria	c__Paceibacteria	o__UBA6257	f__UBA9933	g__UM-FILTER-39-64	s__	0.00275498	0.101688	0.778053	0.023406	0.185087	0.686058	0.296175	0.999984	244318	50.7042	0
H51-bin074_1	d__Bacteria	p__Patescibacteria	c__Paceibacteria	o__2-02-FULL-40-12	f__GWA2-44-9	g__	s__	0.00520236	0.0243804	0.0255943	0.00134507	0.00528322	0.05843	0.0200392	0.119004	482430	66.1972	0
H51-bin075_1	d__Archaea	p__Nanoarchaeota	c__Nanoarchaeia	o__Pacearchaeales	f__UBA73	g__1-14-0-10-34-76	s__	0.00518184	0.00288801	0.00169585	0.00566751	0.217278	0.328027	0.0934564	0.708514	980512	60.5263	1.31579
H51-bin076_1	d__Archaea	p__Nanoarchaeota	c__Nanoarchaeia	o__SCGC-AAA011-G17	f__GCA-2688095	g__GCA-2688095	s__	0.0475882	0.127838	0.00616268	0.0333391	0.0851363	0.127141	0.0712009	0.193981	456059	52.6316	0
H51-bin077	d__Bacteria	p__Patescibacteria	c__Paceibacteria	o__UBA9983_A	f__UBA2163	g__C7867-001	s__	0.177631	0.0105617	0.0196326	0.0669237	0.0362595	0.0755088	0.0644195	0.05836	655861	50.7042	4.22535
H51-bin078_1	d__Archaea	p__Nanoarchaeota	c__Nanoarchaeia	o__SCGC-AAA011-G17	f__	g__	s__	0.00117153	0.0209976	0.0041171	0.00018857	0.0526581	0.081409	0.026757	0.20437	759063	65.7895	1.31579
H51-bin079_1	d__Bacteria	p__Patescibacteria	c__Paceibacteria	o__Sungbacterales	f__HO2-52-23	g__WO2-54-10	s__	0.276802	0.106891	0.0034261	0.00739305	0.258398	0.133525	0.131073	0.150722	549028	50.7042	0
H51-bin080_1	d__Bacteria	p__Patescibacteria	c__Paceibacteria	o__UBA9983_A	f__Zambryskibacteraceae	g__UBA5004	s__	0.0301757	0.0231171	0.00294519	0.00668897	0.044046	0.055931	0.0271506	0.0906207	407275	67.6056	0
H51-bin081_1	d__Bacteria	p__Patescibacteria	c__Paceibacteria	o__2-02-FULL-40-12	f__GWA2-44-9	g__	s__	0.0127869	0.000658148	0.00766387	0.00339663	0.0131342	0.0407933	0.0130722	0.0552637	434366	69.0141	0
H51-bin082_1	d__Archaea	p__Nanoarchaeota	c__Nanoarchaeia	o__Pacearchaeales	f__ARS1285	g__ARS1285	s__	0.0223933	0.00381781	0.00456661	0.00123531	0.275908	0.140882	0.0748005	0.296049	716870	60.5263	1.31579
H51-bin083_1	d__Archaea	p__Nanoarchaeota	c__Nanoarchaeia	o__Pacearchaeales	f__UBA73	g__UBA73	s__	0.012508	0.00355567	0.00147859	0.00476654	0.114907	0.140221	0.0462395	0.359714	860721	60.5263	0
H51-bin085_1	d__Bacteria	p__Patescibacteria	c__UBA1384	o__2-12-FULL-50-11	f__2-12-FULL-50-11	g__	s__	0.00089403	0.276051	0.000753938	0.00791397	0.021884	0.0503322	0.0596382	0.0876216	545769	70.4225	0
H51-bin087_1	d__Archaea	p__Iainarchaeota	c__Iainarchaeia	o__Iainarchaeales	f__GW2011-AR10	g__	s__	0.0561223	0.00547154	0.0497022	0.0090211	0.139632	0.0574689	0.052903	0.0675674	1002859	75	1.31579
H51-bin088	d__Bacteria	p__Patescibacteria	c__Paceibacteria	o__UBA9983_A	f__UBA2163	g__C7867-001	s__	0.0464402	0.00448282	0.00964524	0.00310762	0.0329195	0.0322662	0.0214769	0.0367061	678496	66.1972	0
H51-bin089_1	d__Archaea	p__Nanoarchaeota	c__Nanoarchaeia	o__SCGC-AAA011-G17	f__UBA489	g__	s__	0.0109091	0.0307126	0.00646732	0.0149073	0.0188248	0.0426339	0.0207425	0.0547621	600777	55.2632	1.31579
H51-bin090_1	d__Bacteria	p__Patescibacteria	c__Paceibacteria	o__UBA9983_A	f__UBA9973	g__UBA9973	s__	0.00941907	0.00318151	0.0101763	0.111911	0.0729455	0.10185	0.0515805	0.115911	412841	67.6056	1.40845
H51-bin091_1	d__Bacteria	p__Patescibacteria	c__Microgenomatia	o__Levybacterales	f__UBA12049	g__	s__	0.0382926	0.13578	0.0254811	0.00265394	0.197408	0.148577	0.0913655	0.268026	1040299	73.2394	1.40845
H51-bin092_1	d__Archaea	p__Nanoarchaeota	c__Nanoarchaeia	o__SCGC-AAA011-G17	f__GW2011-AR20	g__GW2011-AR20	s__	0.00954284	0.0205348	0.0187218	0.00271577	0.188464	0.115037	0.0591694	0.245825	596294	53.9474	0
H51-bin093_1	d__Bacteria	p__Patescibacteria	c__ABY1	o__Magasanikbacterales	f__GWA2-37-8	g__XYD2-FULL-39-9	s__	0.0607778	0.058394	0.00850341	0.0488531	0.287642	0.10107	0.0942069	0.142838	779589	64.7887	0
H51-bin094_1	d__Bacteria	p__Patescibacteria	c__Paceibacteria	o__UBA6257	f__GWB1-50-10	g__	s__	0.00945559	0.0535432	0.00319618	0.00378659	0.109406	0.38903	0.0947363	0.944329	378758	67.6056	0
H51-bin095_1	d__Bacteria	p__Patescibacteria	c__Paceibacteria	o__UBA6257	f__1-14-0-10-40-38	g__	s__	0.0141943	0.00397738	0.00140295	0.00287009	0.0456017	0.0741243	0.0236951	0.187192	782495	76.0563	0
H51-bin096_1	d__Bacteria	p__Patescibacteria	c__Paceibacteria	o__UBA9983_A	f__UBA2163	g__	s__	0.0535681	0.00427776	0.00147579	0.00056864	0.0872826	0.0398917	0.0311774	0.0588426	494649	64.7887	4.22535
H51-bin097_1	d__Bacteria	p__Patescibacteria	c__Paceibacteria	o__UBA9983_A	f__UBA11359	g__PALSA-1337	s__	0.0044866	0.025535	0.00366692	0.0771874	0.0587376	0.0652331	0.0391411	0.0858613	455030	67.6056	0
H51-bin099_1	d__Bacteria	p__Patescibacteria	c__Paceibacteria	o__UBA9983_A	f__UBA2163	g__C7867-001	s__	0.0141809	0.00690677	0.000290953	0.0117935	0.0779332	0.0542912	0.0275661	0.113273	703060	76.0563	0
H51-bin100_1	d__Bacteria	p__GWC2-55-46	c__GWC2-55-46	o__GWC2-55-46	f__UBA9637	g__	s__	0.00331786	0.264931	0.0102793	0.0017117	0.307049	0.0739764	0.110211	0.113574	1099118	53.5211	0
H51-bin102_1	d__Bacteria	p__Patescibacteria	c__Paceibacteria	o__UBA9983_A	f__UBA2163	g__UBA10103	s__	0.0125745	0.00227736	0.0214438	0.00788409	0.0450113	0.0420241	0.0218692	0.045889	754814	61.9718	1.40845
H51-bin103_1	d__Bacteria	p__Patescibacteria	c__Paceibacteria	o__UBA9983_A	f__UBA2163	g__C7867-001	s__	0.0416934	0.000558095	0.001746	0.0999386	0.191652	0.119009	0.0757663	0.185579	388379	61.9718	0
H51-bin105_1	d__Bacteria	p__Patescibacteria	c__Paceibacteria	o__UBA9983_A	f__UBA9988	g__	s__	0.00231112	0.0014058	0.000263031	0.000545373	0.0330435	0.0262703	0.0106398	0.0630308	663133	67.6056	0
H51-bin106_1	d__Archaea	p__Nanoarchaeota	c__Nanoarchaeia	o__Pacearchaeales	f__CG1-02-32-21	g__CG1-02-32-21	s__	0.00247069	0.0736096	0.00192284	0.00196047	0.0373467	0.0513136	0.028104	0.105821	706650	51.3158	0
H51-bin110_1	d__Bacteria	p__Patescibacteria	c__Microgenomatia	o__Levybacterales	f__UBA12049	g__	s__	0.00230888	0.00250778	0.0152482	0.000475234	0.0362375	0.0502219	0.0178332	0.0850017	913028	81.6901	4.22535
H51-bin111_1	d__Bacteria	p__Patescibacteria	c__Saccharimonadia	o__Saccharimonadales	f__Saccharimonadaceae	g__	s__	0.00332455	0.000239476	0.00433729	0.00114384	0.0858858	0.0354063	0.0217229	0.052999	749540	74.6479	0
H51-bin112_1	d__Bacteria	p__Patescibacteria	c__Paceibacteria	o__UBA9983_A	f__UBA9988	g__	s__	0.00584962	0.00062005	0.000590348	0.00286742	0.0176177	0.0256205	0.00886094	0.0525471	652282	74.6479	0
H51-bin113_1	d__Archaea	p__Nanoarchaeota	c__Nanoarchaeia	o__SCGC-AAA011-G17	f__GW2011-AR18	g__GW2011-AR18	s__	0.00756029	0.00858138	0.0078969	0.00353375	0.043608	0.0291787	0.0167265	0.039269	922548	65.7895	1.31579
H51-bin114_1	d__Archaea	p__Nanoarchaeota	c__Nanoarchaeia	o__Pacearchaeales	f__UBA73	g__	s__	0.00587504	0.0806572	0.0333801	0.00160344	0.055837	0.068185	0.040923	0.0965534	583421	56.5789	0
H51-bin115_1	d__Bacteria	p__Patescibacteria	c__Microgenomatia	o__Levybacterales	f__UBA12049	g__	s__	0.00215047	0.0179514	0.0061018	0.00153331	0.0200227	0.0476639	0.0159039	0.0712282	507082	74.6479	1.40845
H51-bin116_1	d__Bacteria	p__Patescibacteria	c__Microgenomatia	o__GWA2-44-7	f__UBA8517	g__	s__	0.00236309	0.0201415	0.00320686	0.00419856	0.00961292	0.023996	0.0105865	0.0390004	529190	63.3803	1.40845
H51-bin117_1	d__Bacteria	p__Patescibacteria	c__Paceibacteria	o__UBA6257	f__GWB1-50-10	g__	s__	0.00244354	0.0412007	0.0161494	0.00146136	0.133662	0.0963084	0.0485375	0.151705	432833	60.5634	1.40845
H51-bin118_1	d__Bacteria	p__Patescibacteria	c__Paceibacteria	o__Ryanbacterales	f__GWA2-47-10b	g__	s__	0.00148782	0.000565934	0.000821078	0.00154978	0.0297159	0.0374286	0.0119282	0.0727953	759110	67.6056	0
H51-bin122_1	d__Bacteria	p__Patescibacteria	c__UBA1384	o__2-12-FULL-50-11	f__2-12-FULL-50-11	g__	s__	0.000374236	0.100053	0.00782511	0.000886736	0.0355288	0.036009	0.0301128	0.0555868	503829	63.3803	0
H51-bin123_1	d__Bacteria	p__Patescibacteria	c__Microgenomatia	o__UBA1400	f__CG1-02-47-37	g__	s__	0.00112502	0.0205339	0.0031023	0.0210715	0.0468767	0.0777953	0.0284175	0.133351	788033	67.6056	1.40845
H51-bin126_1	d__Bacteria	p__Patescibacteria	c__Paceibacteria	o__Paceibacterales	f__Staskawiczbacteraceae	g__2-01-FULL-40-39	s__	0.00228672	0.00102646	0.0032493	0.000287904	0.00865053	0.0278018	0.00721711	0.0552431	550710	69.0141	4.22535
H51-bin127_1	d__Archaea	p__Nanoarchaeota	c__Nanoarchaeia	o__Woesearchaeales	f__UBA10107	g__UBA10107	s__	0.000544796	0.000252647	1.66359e-05	0.000306074	0.00777306	0.0178398	0.0044555	0.0477946	848852	56.5789	1.31579
H51-bin128_1	d__Bacteria	p__Patescibacteria	c__Paceibacteria	o__UBA6257	f__WO2-44-18	g__	s__	0.000815706	0.121701	0.000512727	0.00304613	0.0667626	0.0438269	0.0394442	0.0689648	438510	70.4225	0
H51-bin129_1	d__Bacteria	p__Patescibacteria	c__Paceibacteria	o__UBA6257	f__	g__	s__	0.00112196	0.0134539	0.066058	0.0033724	0.1278	0.0447024	0.0427514	0.0579252	603069	54.9296	0
H51-bin130_1	d__Archaea	p__Nanoarchaeota	c__Nanoarchaeia	o__SCGC-AAA011-G17	f__	g__	s__	0.00367144	0.00320583	0.00956964	0.00062788	0.0380055	0.0544137	0.018249	0.123183	716966	64.4737	1.31579
H51-bin131_1	d__Bacteria	p__Patescibacteria	c__Paceibacteria	o__UBA9983_A	f__UBA11359	g__	s__	0.00233276	0.00226803	0.000969569	0.0134525	0.0137422	0.0238789	0.00944066	0.0391908	469394	52.1127	0
H51-bin132_1	d__Bacteria	p__Patescibacteria	c__Paceibacteria	o__2-02-FULL-40-12	f__IGHO2-01-FULL-4-A	g__	s__	0.00175266	0.00100246	0.00719073	0.0339887	0.0123399	0.0361411	0.0154026	0.0478497	425855	59.1549	0
H51-bin135_1	d__Archaea	p__Nanoarchaeota	c__Nanoarchaeia	o__Pacearchaeales	f__CG1-02-32-21	g__CG1-02-32-21	s__	0.00150162	0.000880375	0.000534854	0.000653535	0.0275131	0.0326747	0.0106264	0.0797044	854346	52.6316	0
H51-bin136_1	d__Bacteria	p__Patescibacteria	c__Paceibacteria	o__UBA6257	f__UBA9933	g__GWC1-37-10	s__	0.00499621	0.00583968	0.00198133	0.00347683	0.0939676	0.0724123	0.0304457	0.173185	589600	70.4225	1.40845
H51-bin137_1	d__Archaea	p__Nanoarchaeota	c__Nanoarchaeia	o__UBA10117	f__UBA10117	g__UBA10117	s__	2.18337e-05	0.0118715	0.000301458	0.0133436	0.0227533	0.0348042	0.0138493	0.0667303	510398	53.9474	0
H51-bin138_1	d__Bacteria	p__Patescibacteria	c__Paceibacteria	o__UBA6257	f__WO2-44-18	g__2011-GWA2-47-8b	s__	0.0029626	0.0327553	0.0116992	0.000819422	0.158055	0.084414	0.048451	0.177318	560658	63.3803	0
H51-bin139	d__Archaea	p__Nanoarchaeota	c__Nanoarchaeia	o__Pacearchaeales	f__	g__	s__	0.000608286	0.00778625	0.0326691	0.000618718	0.0692075	0.0546645	0.0275924	0.103874	599619	53.9474	2.63158
H51-bin140_1	d__Archaea	p__Nanoarchaeota	c__Nanoarchaeia	o__SCGC-AAA011-G17	f__	g__	s__	0.00289169	0.11668	0.00124643	0.000575622	0.0723611	0.0544261	0.0413634	0.101844	821143	73.6842	1.31579
H51-bin141_1	d__Bacteria	p__Patescibacteria	c__Saccharimonadia	o__Saccharimonadales	f__UBA10212	g__UBA6824	s__	0.00159186	0.00200089	0.00905502	0.000518225	0.0292028	0.0230479	0.0109028	0.0454272	590025	59.1549	1.40845
H51-bin142_1	d__Bacteria	p__Patescibacteria	c__Andersenbacteria	o__UBA10190	f__	g__	s__	0.00087938	0.00202308	0.000517547	0.000169406	0.0219235	0.0159254	0.00690638	0.0382212	974450	59.1549	7.04225
H51-bin143_1	d__Bacteria	p__Patescibacteria	c__Paceibacteria	o__Ryanbacterales	f__	g__	s__	0.00302501	0.0298451	0.00848421	0.0003757	0.081399	0.0391868	0.0270526	0.0742704	567315	52.1127	0
H51-bin144_1	d__Bacteria	p__Patescibacteria	c__Paceibacteria	o__UBA9983_A	f__UBA1539	g__	s__	0.0029062	0.000838343	0.000361124	0.00347679	0.102436	0.072468	0.0304144	0.176019	445021	73.2394	0
H51-bin145_1	d__Bacteria	p__Patescibacteria	c__Paceibacteria	o__UBA9983_A	f__	g__	s__	0.00151315	0.00062304	0.0174315	0.00116704	0.0579643	0.0365453	0.0192074	0.0697757	386202	64.7887	0
H51-bin146	d__Bacteria	p__Bdellovibrionota	c__Bdellovibrionia	o__Bdellovibrionales	f__UBA1609	g__	s__	0.00223283	0.000297333	5.31156e-05	0.00034671	0.0735086	0.0238118	0.0167084	0.0501407	2553304	78.8732	1.40845
H51-bin148_1	d__Bacteria	p__Patescibacteria	c__Paceibacteria	o__UBA6257	f__GWB1-50-10	g__GWB1-50-10	s__	0.000869247	4.35979e-05	2.3789e-05	0.000181183	0.0198304	0.0284785	0.00823779	0.0762282	547505	64.7887	0
H51-bin149_1	d__Bacteria	p__Patescibacteria	c__Paceibacteria	o__UBA9983_A	f__UBA9988	g__	s__	0.000571681	0.00119384	4.97462e-05	0.000708059	0.0131858	0.0156032	0.00521873	0.0404763	486837	53.5211	0
H51-bin150_1	d__Bacteria	p__Patescibacteria	c__Paceibacteria	o__WOR2-41-13_A	f__2-01-FULL-45-33	g__	s__	0.00573229	0.00384596	0.00824342	0.000539318	0.0712573	0.0412228	0.0218068	0.0833029	476565	64.7887	0
H51-bin151_1	d__Bacteria	p__Patescibacteria	c__Paceibacteria	o__WO2-41-13	f__H02-45-28	g__HO2-45-28	s__	0.00434585	0.0317677	0.000917774	0.00129222	0.167783	0.0606276	0.0444556	0.119953	557881	74.6479	0
H51-bin152_1	d__Bacteria	p__Patescibacteria	c__Paceibacteria	o__UBA9983_A	f__XYD1-FULL-46-19	g__	s__	0.00102042	0.0988083	0.000171613	0.000356402	0.077817	0.04244	0.036769	0.074645	540444	70.4225	0
H51-bin154_1	d__Archaea	p__Iainarchaeota	c__Iainarchaeia	o__	f__	g__	s__	0.000219203	0.0147554	0.00603561	0.000798632	0.0669548	0.0346208	0.0205641	0.070363	937280	63.1579	2.63158
H51-bin155_1	d__Bacteria	p__Patescibacteria	c__Paceibacteria	o__WOR2-41-13_A	f__2-01-FULL-45-33	g__	s__	0.000710058	0.00799538	0.0130412	0.000126458	0.0462711	0.033199	0.0168905	0.0647227	553019	71.831	0
H51-bin156_1	d__Bacteria	p__Patescibacteria	c__ABY1	o__UBA10025	f__PEXW01	g__PEXW01	s__	0.0023734	0.00141626	0.000204842	0.00473979	0.216179	0.0488301	0.045624	0.0934655	931116	80.2817	0
H51-bin157_1	d__Archaea	p__Nanoarchaeota	c__Nanoarchaeia	o__Pacearchaeales	f__GW2011-AR1	g__	s__	0.000608596	0.000634844	0.000116313	0.0517812	0.0694448	0.0384605	0.0268411	0.0578735	665735	57.8947	1.31579
H51-bin158_1	d__Bacteria	p__Patescibacteria	c__Paceibacteria	o__GWC2-36-17	f__M10-OD1-4	g__	s__	0.000272259	5.14328e-05	1.95037e-05	0.000129046	0.0401442	0.0255388	0.0110259	0.0638908	769993	80.2817	0
H51-bin159_1	d__Bacteria	p__Patescibacteria	c__UBA1384	o__XYA2-FULL-43-10	f__XYA2-FULL-43-10	g__	s__	0.000121094	1.13539e-05	5.65677e-06	0.000123777	0.027201	0.0296015	0.00951073	0.078804	360038	56.338	0
H51-bin160_1	d__Bacteria	p__Patescibacteria	c__Paceibacteria	o__UBA6257	f__2-01-FULL-56-20	g__	s__	0.00226536	0.000258454	8.00188e-05	0.000312475	0.103171	0.0362268	0.0237191	0.0776458	940022	67.6056	2.8169
H51-bin161_1	d__Bacteria	p__Patescibacteria	c__ABY1	o__SG8-24	f__UBA9934	g__UBA11707	s__	0.0010363	0.000347286	0.00194426	0.00252707	0.106857	0.0356477	0.0247266	0.074293	526291	56.338	0
H51-bin162_1	d__Bacteria	p__Omnitrophota	c__koll11	o__UBA1572	f__UBA1572	g__UM-FILTER-44-12	s__	0.00338238	0.0042934	0.0422786	0.179151	0.371878	0.0618462	0.110472	0.115788	977080	61.9718	4.22535
H51-bin164_1	d__Bacteria	p__Planctomycetota	c__Phycisphaerae	o__UBA1845	f__UTPLA1	g__UTPLA1	s__	0.0450208	0.009479	0.0416319	0.0340476	0.569177	0.075191	0.129091	0.165386	3349070	91.5493	0
H51-bin165_1	d__Bacteria	p__Gemmatimonadota	c__Gemmatimonadetes	o__Gemmatimonadales	f__Gemmatimonadaceae	g__Fen-1231	s__	0.0164286	0.0423252	0.0550926	0.0787202	0.369494	0.0585238	0.103431	0.106638	2454972	81.6901	0
H51-bin166_1	d__Bacteria	p__Patescibacteria	c__Paceibacteria	o__UBA6257	f__UBA9933	g__	s__	0.00154648	0.00583375	0.0157816	0.00201761	0.418419	0.184265	0.104644	0.392275	394719	53.5211	0
H51-bin167_1	d__Bacteria	p__Patescibacteria	c__Paceibacteria	o__UBA9983_A	f__UBA11359_A	g__2-02-FULL-44-35	s__	0.0531	0.0713113	0.0290007	0.111941	0.0682378	0.0927545	0.0710576	0.0656251	387357	60.5634	0
H51-bin169_1	d__Bacteria	p__Patescibacteria	c__Paceibacteria	o__UBA6257	f__UBA9933	g__	s__	0.00717688	1.14136	0.00353432	0.00316792	0.226851	1.14712	0.421535	2.56119	442296	63.3803	0
H51-bin173_1	d__Bacteria	p__Patescibacteria	c__Paceibacteria	o__UBA9983_A	f__UBA2163	g__C7867-001	s__	0.0206415	1.25644	0.0969284	0.0170621	0.282692	0.754479	0.404707	1.19851	368389	53.5211	0
H51-bin175_1	d__Bacteria	p__Proteobacteria	c__Gammaproteobacteria	o__Burkholderiales	f__SG8-41	g__PALSA-1004	s__	0.521419	0.0414508	0.0235432	0.427067	0.159102	0.137655	0.218373	0.181338	1354600	50.7042	2.8169
H51-bin177_1	d__Bacteria	p__Patescibacteria	c__Paceibacteria	o__UBA9983_A	f__	g__	s__	0.00478394	0.0956138	0.00729342	0.00248263	0.0804649	0.0942918	0.0474884	0.179708	378747	52.1127	0
H51-bin180_1	d__Archaea	p__Nanoarchaeota	c__Nanoarchaeia	o__Woesearchaeales	f__GW2011-AR4	g__	s__	0.14511	0.0941902	0.0284889	0.0259019	0.583536	0.102166	0.163232	0.16678	1254660	52.6316	3.94737
H51-bin182_1	d__Bacteria	p__Binatota	c__Binatia	o__UBA9968	f__UBA9968	g__UBA9968	s__UBA9968 sp001799045	0.0271743	0.0372756	0.00674736	0.117724	0.131941	0.0340549	0.0591529	0.0469047	1680026	60.5634	1.40845
H51-bin184	d__Bacteria	p__Actinobacteriota	c__Acidimicrobiia	o__Microtrichales	f__Ilumatobacteraceae	g__	s__	0.0071715	0.00230127	0.042601	0.00166342	0.236844	0.0309288	0.053585	0.0696592	4661526	85.9155	0
H51-bin186_1	d__Bacteria	p__Nitrospirota	c__Thermodesulfovibrionia	o__Thermodesulfovibrionales	f__UBA1546	g__	s__	0.00119225	0.00644632	0.219191	0.0922948	0.149306	0.0502295	0.0864433	0.0735643	2081197	66.1972	4.22535
H51-bin187_1	d__Bacteria	p__Nitrospirota	c__Nitrospiria	o__Nitrospirales	f__Nitrospiraceae	g__Nitrospira_D	s__	0.00597942	0.212628	0.400027	0.0317797	0.127633	0.0950408	0.145515	0.122524	1589755	66.1972	1.40845
H51-bin188_1	d__Archaea	p__Crenarchaeota	c__Nitrososphaeria	o__Nitrososphaerales	f__Nitrosopumilaceae	g__CSP1-1	s__	0.622947	0.0407395	0.0129174	0.0163029	0.154419	0.127857	0.162531	0.186267	872290	53.9474	0
H51-bin189_1	d__Bacteria	p__Binatota	c__Binatia	o__UBA9968	f__UBA9968	g__UBA9968	s__	0.470025	0.042895	0.0148427	0.00745461	0.191509	0.0917569	0.136414	0.144236	1455017	59.1549	0
H51-bin190_1	d__Bacteria	p__Proteobacteria	c__Gammaproteobacteria	o__Acidiferrobacterales	f__Sulfurifustaceae	g__SM1-46	s__	0.0124391	0.14802	0.0028986	0.00143038	0.0729303	0.0820872	0.053301	0.142056	1137989	52.1127	0
H51-bin191_1	d__Bacteria	p__Gemmatimonadota	c__Gemmatimonadetes	o__Gemmatimonadales	f__GWC2-71-9	g__	s__	0.0729255	0.119792	0.0235849	0.0209504	0.146064	0.0455401	0.071476	0.0496403	1611405	71.831	0
H51-bin193_1	d__Bacteria	p__GWC2-55-46	c__GWC2-55-46	o__GWC2-55-46	f__UBA9637	g__	s__	0.558484	0.178351	0.00330202	0.00644293	0.564863	0.158311	0.244959	0.219363	695869	56.338	0
H51-bin196_1	d__Bacteria	p__Patescibacteria	c__Microgenomatia	o__Levybacterales	f__UBA12049	g__	s__	0.0602764	0.184466	0.00583174	0.00252108	0.243584	0.0681149	0.0941323	0.0811402	1214050	78.8732	1.40845
H51-bin197_1	d__Bacteria	p__Patescibacteria	c__Paceibacteria	o__UBA9983	f__	g__	s__	0.00795922	0.815991	0.003787	0.065372	0.451788	0.207368	0.258711	0.289887	525692	69.0141	0
H51-bin198_1	d__Bacteria	p__GWC2-55-46	c__GWC2-55-46	o__GWC2-55-46	f__UBA9637	g__	s__	0.00527198	0.400731	0.0114826	0.00290121	0.489478	0.110803	0.170111	0.175846	1436008	74.6479	0
H51-bin200_1	d__Bacteria	p__Methylomirabilota	c__Methylomirabilia	o__Methylomirabilales	f__	g__	s__	0.246819	0.0274498	0.0196844	0.0202963	0.199306	0.0593014	0.0954761	0.0843422	1430033	73.2394	0
H51-bin202_1	d__Bacteria	p__Proteobacteria	c__Gammaproteobacteria	o__Burkholderiales	f__Nitrosomonadaceae	g__Nitrosomonas	s__	0.00140917	0.000873948	0.273508	0.085362	0.104269	0.0520701	0.0862487	0.0820531	1524724	64.7887	0
H51-bin204_1	d__Bacteria	p__Nitrospirota	c__Nitrospiria	o__Nitrospirales	f__Nitrospiraceae	g__40CM-3-62-11	s__	0.192784	0.0517103	0.0145895	0.00128313	0.136384	0.0483936	0.0741908	0.0633021	1879830	69.0141	0
H51-bin205_1	d__Bacteria	p__Proteobacteria	c__Gammaproteobacteria	o__Acidiferrobacterales	f__UBA6901	g__	s__	0.00656137	0.13025	0.032421	0.00232517	0.24595	0.0443815	0.0769815	0.0768563	1193480	53.5211	0
H51-bin207_2	d__Bacteria	p__Planctomycetota	c__Brocadiae	o__Brocadiales	f__Brocadiaceae	g__	s__	0.00425307	0.00489144	0.0425459	0.0446529	0.139643	0.025497	0.0435806	0.0411416	2263679	66.1972	0
H51-bin208_1	d__Bacteria	p__Methylomirabilota	c__Methylomirabilia	o__Rokubacteriales	f__GWA2-73-35	g__UBA12499	s__UBA12499 sp001788395	0.035711	0.0666851	0.0248016	0.0243733	0.155213	0.0328326	0.0566028	0.0452727	1596661	71.831	0
H51-bin209	d__Bacteria	p__Patescibacteria	c__ABY1	o__UBA2169	f__UBA2169	g__2-02-FULL-48-11-A	s__	0.0113951	0.124748	0.00895534	0.00688213	0.115477	0.0411323	0.0514317	0.0519201	827069	52.1127	1.40845
H51-bin210_1	d__Bacteria	p__Chloroflexota	c__Anaerolineae	o__Anaerolineales	f__	g__	s__	0.00142567	0.061618	0.00979035	0.074742	0.228261	0.0416911	0.069588	0.066986	2727793	54.9296	1.40845
H51-bin211_1	d__Archaea	p__Nanoarchaeota	c__Nanoarchaeia	o__Woesearchaeales	f__UBA10216	g__UBA10216	s__	0.0457067	0.0837274	0.00838101	0.00625649	0.184192	0.0385479	0.0611352	0.0547299	693483	50	0
H51-bin214_1	d__Bacteria	p__Planctomycetota	c__Brocadiae	o__Brocadiales	f__2-02-FULL-50-16-A	g__2-02-FULL-50-16-A	s__2-02-FULL-50-16-A sp001828605	0.00114512	0.0508596	0.0105102	0.0025779	0.278559	0.0362483	0.0633168	0.0820456	1620486	60.5634	0
H51-bin215_1	d__Bacteria	p__Proteobacteria	c__Gammaproteobacteria	o__Acidiferrobacterales	f__Sulfurifustaceae	g__	s__	0.00269123	0.009656	0.00104395	0.00527298	0.326626	0.0411225	0.064402	0.0967511	1481788	61.9718	0
H51-bin222_1	d__Bacteria	p__Patescibacteria	c__ABY1	o__Magasanikbacterales	f__UBA10197	g__	s__	0.00918444	0.0605067	0.00312713	0.00608059	0.199586	0.0469887	0.0542456	0.0726613	755908	67.6056	1.40845
H51-bin224_1	d__Bacteria	p__Desulfobacterota	c__Syntrophia	o__Syntrophales	f__UBA5619	g__UBA5619	s__	0.00156468	0.000746922	0.0432117	0.0146578	0.09288	0.016722	0.0282972	0.0282331	1457681	52.1127	1.40845
H51-bin225_1	d__Archaea	p__Nanoarchaeota	c__Nanoarchaeia	o__Woesearchaeales	f__ARS49	g__	s__	0.00237155	0.00576122	0.000313094	0.00121711	0.493873	0.0554565	0.0931654	0.146865	914157	55.2632	2.63158
H51-bin226_1	d__Bacteria	p__Patescibacteria	c__Paceibacteria	o__UBA9983_A	f__UBA11359_A	g__	s__	0.00190328	0.0924129	0.172667	0.00152613	0.533807	0.10016	0.150413	0.158885	684735	61.9718	0
H51-bin227_1	d__Bacteria	p__Nitrospirota	c__Thermodesulfovibrionia	o__	f__	g__	s__	0.00104528	0.0451276	0.00655411	0.0084367	0.445313	0.0517713	0.0930414	0.131804	1819562	83.0986	0
H51-bin228_1	d__Bacteria	p__Patescibacteria	c__Paceibacteria	o__Sungbacterales	f__HO2-52-23	g__	s__	0.00143163	0.000653109	0.000146628	0.00054927	0.457298	0.0531568	0.0855392	0.136168	993010	74.6479	0
H51-bin230_1	d__Bacteria	p__Patescibacteria	c__ABY1	o__Magasanikbacterales	f__UBA10003	g__UBA10003	s__	0.00164622	0.00301117	0.00242752	0.0126976	0.339236	0.0500464	0.0681775	0.10418	576559	50.7042	0
H51-bin231_1	d__Bacteria	p__Omnitrophota	c__koll11	o__GIF10	f__UBA6249	g__	s__	0.00401882	0.011586	0.00695327	0.182892	0.491496	0.0747831	0.128621	0.14879	1290555	88.7324	0
H51-bin232_1	d__Bacteria	p__KSB1	c__UBA2214	o__UBA2214	f__	g__	s__	0.0018388	0.000766227	0.00339311	0.00217498	0.162243	0.0182786	0.0314491	0.0480211	3452618	61.9718	4.22535
H51-bin234_1	d__Bacteria	p__Nitrospirota	c__Nitrospiria	o__Nitrospirales	f__Nitrospiraceae	g__Palsa-1315	s__	0.0901684	0.186447	0.879309	0.138991	1.70081	0.339308	0.555839	0.51564	1667827	81.6901	0
H51-bin236_1	d__Bacteria	p__Patescibacteria	c__Paceibacteria	o__UBA9983_A	f__UBA2163	g__C7867-001	s__	0.0118249	0.00570469	1.46371	0.119054	0.68027	2.41635	0.782818	4.10442	620744	74.6479	0
H51-bin239_1	d__Bacteria	p__Binatota	c__Binatia	o__UBA9968	f__UBA9968	g__UBA9968	s__	0.628239	0.0566952	0.0202697	0.0126735	0.291626	0.12572	0.189204	0.194656	2361775	71.831	0
H51-bin243_1	d__Bacteria	p__Planctomycetota	c__Brocadiae	o__Brocadiales	f__Brocadiaceae	g__	s__	0.00379522	0.00372638	0.0389422	0.0389933	0.139434	0.0241398	0.0415052	0.0409129	2244781	84.507	0
H51-bin244	d__Bacteria	p__Planctomycetota	c__UBA1135	o__UBA1135	f__	g__	s__	0.00746126	0.00807956	0.0303077	0.00357355	0.170158	0.024845	0.0407375	0.049142	3073105	50.7042	5.6338
H51-bin248_1	d__Bacteria	p__Nitrospirota	c__Nitrospiria	o__Nitrospirales	f__Nitrospiraceae	g__Nitrospira_D	s__	0.00539651	0.162914	0.337266	0.0238704	0.102926	0.0766053	0.118163	0.101578	748764	52.1127	0
H51-bin249_1	d__Archaea	p__Crenarchaeota	c__Nitrososphaeria	o__Nitrososphaerales	f__Nitrosopumilaceae	g__	s__	0.542926	0.0348789	0.0120231	0.0141065	0.143782	0.112241	0.143326	0.162374	751339	55.2632	0
H51-bin250_1	d__Bacteria	p__Nitrospirota	c__Nitrospiria	o__9FT-COMBO-42-15	f__9FT-COMBO-42-15	g__	s__	0.0261987	10.9698	0.0848137	0.00645881	0.438956	1.23633	2.1271	3.24881	2415501	91.5493	1.40845
H51-bin251_1	d__Bacteria	p__Nitrospirota	c__Nitrospiria	o__Nitrospirales	f__Nitrospiraceae	g__Palsa-1315	s__	0.129099	0.0288546	2.17403	0.0303122	1.49586	0.419217	0.712894	0.725438	3293627	92.9577	0
H51-bin255_1	d__Bacteria	p__Methylomirabilota	c__Methylomirabilia	o__Rokubacteriales	f__GWA2-73-35	g__CSP1-6	s__	0.803771	0.135405	0.031213	0.328109	0.383755	0.196003	0.313043	0.24623	2279921	71.831	1.40845
H51-bin256_1	d__Bacteria	p__Nitrospirota	c__Nitrospiria	o__	f__	g__	s__	0.446754	0.0190995	0.00035777	0.000242819	0.170782	0.0736596	0.118483	0.135863	1396620	61.9718	0
H51-bin261_1	d__Bacteria	p__Methylomirabilota	c__Methylomirabilia	o__Methylomirabilales	f__	g__	s__	0.223705	0.0266614	0.0188846	0.0185985	0.179615	0.0543552	0.08697	0.0761816	994015	56.338	1.40845
H51-bin263_1	d__Bacteria	p__Proteobacteria	c__Gammaproteobacteria	o__Burkholderiales	f__Nitrosomonadaceae	g__	s__	0.00533527	0.0027969	0.406279	0.0620105	1.39008	0.191811	0.343052	0.416466	1877079	92.9577	0
H51-bin264_1	d__Bacteria	p__Nitrospirota	c__Nitrospiria	o__Nitrospirales	f__Nitrospiraceae	g__40CM-3-62-11	s__	0.147954	0.0443402	0.0119001	0.000792433	0.109185	0.0381752	0.0587245	0.0491764	1227457	53.5211	0
H51-bin265	d__Bacteria	p__Nitrospirota	c__Nitrospiria	o__HDB-SIOI813	f__HDB-SIOI813	g__RBG-16-43-11	s__	0.0409452	0.312162	0.0190498	0.0249217	0.19271	0.0625115	0.108717	0.0993879	2115042	54.9296	11.2676
H51-bin266_1	d__Bacteria	p__Methylomirabilota	c__Methylomirabilia	o__Rokubacteriales	f__GWA2-73-35	g__UBA12499	s__UBA12499 sp001788395	0.0385952	0.0696106	0.0258632	0.0249798	0.162114	0.0342909	0.0592423	0.0473315	1710681	74.6479	1.40845
H51-bin267_1	d__Bacteria	p__Acidobacteriota	c__Mor1	o__Gp22-AA2	f__Gp22-AA2	g__	s__	0.0374327	0.037643	0.0459421	0.0120841	0.253505	0.0402564	0.0711439	0.0729684	1711621	64.7887	2.8169
H51-bin268_1	d__Bacteria	p__Planctomycetota	c__Brocadiae	o__Brocadiales	f__Brocadiaceae	g__2-12-FULL-39-13	s__2-12-FULL-39-13 sp001824485	0.0551408	0.073563	0.0472115	0.0072965	0.1187	0.0339615	0.0559789	0.0376266	1391997	60.5634	0
H51-bin269_1	d__Bacteria	p__Chloroflexota	c__Anaerolineae	o__Anaerolineales	f__	g__	s__	0.00207994	0.06288	0.00958019	0.0778517	0.2027	0.0392224	0.065719	0.0602987	1208537	60.5634	0
H51-bin270_1	d__Bacteria	p__Binatota	c__Binatia	o__UBA9968	f__UBA9968	g__UBA9968	s__UBA9968 sp001799045	0.0212912	0.0334325	0.00570766	0.102303	0.115784	0.029327	0.0513075	0.0411711	1136974	61.9718	0
H51-bin271_1	d__Bacteria	p__Patescibacteria	c__Microgenomatia	o__UBA1400	f__	g__	s__	0.00226144	0.273479	0.0243139	0.00954159	0.620166	0.100115	0.171646	0.190262	620669	54.9296	0
H51-bin272_1	d__Bacteria	p__Proteobacteria	c__Gammaproteobacteria	o__Burkholderiales	f__Nitrosomonadaceae	g__Nitrosomonas	s__	0.000512914	0.000109301	0.128714	0.0033227	0.15062	0.0299134	0.0521987	0.0551648	1196992	59.1549	0
H51-bin273_1	d__Bacteria	p__Chloroflexota	c__Dehalococcoidia	o__UBA3495	f__UBA3495	g__	s__	0.159196	0.079516	0.0210436	0.00106375	0.372289	0.0690003	0.117018	0.112028	1239352	59.1549	0
H51-bin274_1_1	d__Bacteria	p__Chloroflexota	c__Anaerolineae	o__Anaerolineales	f__envOPS12	g__OLB14	s__	0.0140372	0.00595264	0.0283879	0.0380735	0.692877	0.0864722	0.1443	0.202482	4258004	84.507	0
H51-bin276_1	d__Bacteria	p__Elusimicrobiota	c__Elusimicrobia	o__UBA1565	f__UBA9628	g__	s__	0.0136812	0.0532829	0.0291912	0.00316199	0.659088	0.0778559	0.139377	0.194381	2389137	74.6479	0
H51-bin277_1	d__Bacteria	p__Nitrospinota	c__UBA9942	o__UBA9942	f__UBA9942	g__PLOWO2-12-39-15	s__	0.00149016	0.0921703	0.00197896	0.000529163	0.169502	0.0270711	0.0487903	0.0546954	1540817	60.5634	0
H51-bin278_1	d__Bacteria	p__Proteobacteria	c__Gammaproteobacteria	o__Burkholderiales	f__Gallionellaceae	g__Sideroxydans	s__	0.00526222	0.00102194	0.000924758	0.0739444	0.222234	0.0339382	0.0562209	0.0662064	1565670	52.1127	0
H51-bin279_1	d__Bacteria	p__Bacteroidota	c__UBA10030	o__UBA10030	f__UBA6906	g__	s__	0.000787302	0.0132391	0.0256492	0.027783	0.180876	0.0257458	0.0456801	0.0526486	2407895	57.7465	0
H51-bin280_1	d__Bacteria	p__Nitrospirota	c__Thermodesulfovibrionia	o__Thermodesulfovibrionales	f__UBA1546	g__	s__	0.00133147	0.0052731	0.166039	0.0774493	0.118735	0.0395645	0.0680653	0.056855	1498464	54.9296	0
H51-bin282_1	d__Bacteria	p__Patescibacteria	c__ABY1	o__Magasanikbacterales	f__UBA10003	g__	s__	0.00172166	0.0283283	0.0910464	0.0450835	0.263567	0.0483157	0.0796771	0.0764312	745630	74.6479	0
H51-bin286_1	d__Bacteria	p__Planctomycetota	c__UBA8742	o__	f__	g__	s__	0.00137521	8.13289e-05	0.000989292	0.000629946	0.288523	0.029379	0.0534962	0.0863828	5504616	84.507	0
H51-bin287_1	d__Bacteria	p__UBA8481	c__UBA8481	o__UBA8481	f__UBA8481	g__	s__	0.00239748	0.00205609	0.00196533	0.00077272	0.328699	0.0339356	0.0616378	0.0982586	2521282	76.0563	2.8169
H51-bin288_1	d__Bacteria	p__Patescibacteria	c__Paceibacteria	o__UBA9983_A	f__UBA11359_A	g__2-02-FULL-44-35	s__	0.0472425	0.064597	0.0244075	0.101413	0.0632274	0.0846123	0.0642499	0.0589418	315168	50.7042	0
H51-bin291_1	d__Bacteria	p__Nitrospirota	c__Nitrospiria	o__Nitrospirales	f__Nitrospiraceae	g__Nitrospira	s__	0.0167885	0.00159119	1.6902	0.0346207	0.202361	0.217719	0.360546	0.494482	2061726	67.6056	0
H51-bin295_1	d__Bacteria	p__Patescibacteria	c__Paceibacteria	o__UBA9983_A	f__UBA9973	g__UBA9973	s__	0.00503279	0.00230666	0.000891042	0.00165618	0.207659	0.0930932	0.0517731	0.182801	572265	50.7042	1.40845
H51-bin296_1	d__Bacteria	p__Methylomirabilota	c__Methylomirabilia	o__Rokubacteriales	f__GWA2-73-35	g__UBA12499	s__UBA12499 sp001788395	0.0427386	0.0924897	0.0324694	0.0295638	0.204099	0.0427856	0.0740243	0.0600264	3291665	78.8732	1.40845
H51-bin297_1	d__Bacteria	p__Planctomycetota	c__Brocadiae	o__Brocadiales	f__Brocadiaceae	g__	s__	0.00333484	0.00337211	0.0401759	0.0401227	0.129847	0.0232778	0.0400218	0.0383978	2356973	77.4648	0
H51-bin298_1	d__Bacteria	p__Binatota	c__Binatia	o__UBA9968	f__UBA9968	g__UBA9968	s__UBA9968 sp001799045	0.042994	0.0453687	0.00809786	0.146101	0.154776	0.0423401	0.0732796	0.0562577	1947958	54.9296	0
H51-bin301_1	d__Bacteria	p__Planctomycetota	c__Brocadiae	o__MHYJ01	f__	g__	s__	0.00452452	0.00338648	0.0316118	0.00221641	0.708695	0.0763634	0.1378	0.210958	5418064	97.1831	1.40845
H51-bin303_1	d__Bacteria	p__Planctomycetota	c__Brocadiae	o__Brocadiales	f__2-02-FULL-50-16-A	g__2-12-FULL-52-36	s__	0.00125051	0.091952	0.0129788	0.0103062	0.195703	0.0333039	0.0575824	0.0600733	1044977	59.1549	1.40845
H51-bin304_1	d__Bacteria	p__Nitrospirota	c__Thermodesulfovibrionia	o__Thermodesulfovibrionales	f__UBA1546	g__	s__	0.000538418	0.0042205	0.174323	0.0794015	0.119056	0.0404655	0.0696675	0.0590008	1601617	60.5634	4.22535
H51-bin306_1	d__Bacteria	p__Planctomycetota	c__Brocadiae	o__MHYJ01	f__	g__	s__	0.0517245	0.0131885	0.00600503	0.111648	0.685471	0.0879696	0.159334	0.201962	3060340	53.5211	0
H51-bin308_1	d__Archaea	p__Crenarchaeota	c__Nitrososphaeria	o__Nitrososphaerales	f__Nitrosopumilaceae	g__	s__	0.662276	0.0442138	0.01349	0.0154593	0.160037	0.135784	0.171877	0.199045	882142	65.7895	0
H51-bin310_1	d__Bacteria	p__Binatota	c__Binatia	o__UBA9968	f__UBA9968	g__UBA9968	s__	0.453775	0.0420397	0.0149691	0.00724597	0.188635	0.0897193	0.132731	0.139751	1116566	54.9296	0
H51-bin313_1	d__Archaea	p__Thermoplasmatota	c__Thermoplasmata	o__RBG-16-68-12	f__RBG-16-68-12	g__	s__	0.141254	0.0236124	0.0151015	0.054717	0.142515	0.0468129	0.0706688	0.0542259	883248	57.8947	0
H51-bin315_1	d__Bacteria	p__Nitrospirota	c__Nitrospiria	o__	f__	g__	s__	0.520363	0.0222565	0.000409934	0.000331986	0.159125	0.0819513	0.13074	0.155879	1207960	50.7042	1.40845
H51-bin318_1	d__Bacteria	p__Methylomirabilota	c__Methylomirabilia	o__Methylomirabilales	f__	g__	s__	0.245432	0.0283891	0.0199623	0.0199421	0.191676	0.0587675	0.0940282	0.0827786	1212854	66.1972	0
H51-bin319_1	d__Bacteria	p__Proteobacteria	c__Gammaproteobacteria	o__Burkholderiales	f__Nitrosomonadaceae	g__Nitrosomonas	s__	0.000835887	0.000311594	0.270473	0.0786358	0.106778	0.0513622	0.0847326	0.0811608	1540749	71.831	0
H51-bin322_1	d__Bacteria	p__Nitrospirota	c__Nitrospiria	o__Nitrospirales	f__Nitrospiraceae	g__40CM-3-62-11	s__	0.186703	0.0529732	0.0151128	0.00110686	0.133059	0.0476557	0.0727685	0.0615009	1738408	64.7887	0
H51-bin323_1	d__Bacteria	p__Chloroflexota	c__Anaerolineae	o__Anaerolineales	f__	g__	s__	0.0165315	0.0410234	0.0425471	0.0628098	0.610374	0.0844818	0.142961	0.176154	3961638	80.2817	0
H51-bin325_1	d__Bacteria	p__Patescibacteria	c__Paceibacteria	o__WO2-41-13	f__2-12-FULL-41-13	g__	s__	0.000997087	0.0851048	0.00012203	0.00168071	0.277837	0.105455	0.0785328	0.209315	325755	61.9718	0
H51-bin326_1	d__Bacteria	p__Patescibacteria	c__ABY1	o__UBA11705	f__UBA11705	g__	s__	0.167063	0.191006	0.00777056	0.0149986	0.302477	0.0824455	0.127627	0.0990816	1076138	80.2817	0
H51-bin327_1	d__Bacteria	p__Acidobacteriota	c__Mor1	o__Gp22-AA2	f__Gp22-AA2	g__Gp22-AA3	s__	0.0378715	0.041559	0.0524712	0.0114264	0.266161	0.0425722	0.0753435	0.0767309	1951789	63.3803	1.40845
H51-bin331_1	d__Bacteria	p__Patescibacteria	c__Saccharimonadia	o__Saccharimonadales	f__UBA10212	g__	s__	0.000870297	0.000340911	8.62379e-05	0.000307904	0.390139	0.137857	0.0882669	0.302815	813460	71.831	1.40845
H51-bin332_1	d__Archaea	p__Nanoarchaeota	c__Nanoarchaeia	o__Woesearchaeales	f__GW2011-AR9	g__UBA10204	s__	0.00164213	0.245749	0.0459828	0.00169946	0.476252	0.0855536	0.142813	0.14878	1121099	69.7368	2.63158
H51-bin333_1	d__Bacteria	p__Omnitrophota	c__koll11	o__1-14-0-20-42-13	f__1-14-0-20-42-13	g__	s__	0.00929897	0.0127275	0.053263	0.0216519	1.33442	0.159897	0.26521	0.393864	1453729	85.9155	0
H51-bin334_1	d__Bacteria	p__Patescibacteria	c__Paceibacteria	o__Paceibacterales	f__UBA10102	g__	s__	0.0178557	0.00407497	0.0117715	0.00671716	0.66811	0.142248	0.141796	0.264239	670814	76.0563	0
H51-bin336_1	d__Bacteria	p__Hydrogenedentota	c__Hydrogenedentia	o__Hydrogenedentiales	f__GCA-2746185	g__	s__	0.00217907	0.00193818	0.0028342	0.000293071	0.265671	0.0276831	0.0500998	0.0793356	2944222	60.5634	2.8169
H51-bin339	d__Bacteria	p__Planctomycetota	c__UBA11346	o__UBA11346	f__UBA11346	g__UBA11346	s__	0.0195358	0.000618387	0.00240331	0.00088783	0.266654	0.0296594	0.0532932	0.0791936	4780986	78.8732	0
H51-bin340_1	d__Archaea	p__Nanoarchaeota	c__Nanoarchaeia	o__Woesearchaeales	f__	g__	s__	0.00458027	0.000592102	0.000279976	0.000696381	0.435613	0.0940148	0.089296	0.185386	1528896	73.6842	1.31579
H52-bin001_1	d__Bacteria	p__Proteobacteria	c__Gammaproteobacteria	o__UBA12402	f__UBA12402	g__O2-02-FULL-42-9	s__	0.0136905	0.0132317	0.0664179	0.228915	0.00312043	0.0764328	0.0669681	0.0955223	1622338	95.7746	0
H52-bin002_1	d__Bacteria	p__Patescibacteria	c__Microgenomatia	o__UBA1400	f__CG1-02-47-37	g__	s__	0.000506944	0.0176735	0.00399349	0.0207774	0.0328596	0.0809175	0.0261214	0.158863	723035	71.831	1.40845
H52-bin004_1	d__Archaea	p__Nanoarchaeota	c__Nanoarchaeia	o__Pacearchaeales	f__GW2011-AR1	g__ASMP01	s__	0.00396955	0.230141	0.0641891	0.0393671	0.0130418	0.673631	0.170723	1.59696	567365	56.5789	0
H52-bin005_1	d__Bacteria	p__Patescibacteria	c__Paceibacteria	o__UBA6257	f__UBA9933	g__	s__	0.0101294	0.124617	0.881388	0.0287746	0.404125	0.780385	0.37157	1.11241	369419	59.1549	0
H52-bin006_1	d__Bacteria	p__Proteobacteria	c__Gammaproteobacteria	o__Burkholderiales	f__Nitrosomonadaceae	g__Nitrosomonas	s__	0.000957812	0.000276264	0.202375	0.0507704	0.0636679	0.0365052	0.0590921	0.0592996	943964	59.1549	0
H52-bin007_1	d__Bacteria	p__Patescibacteria	c__Paceibacteria	o__UBA9983_A	f__UBA2163	g__UBA2163	s__	0.0043124	0.0224498	0.100083	0.00374823	0.0038459	0.090497	0.0374893	0.171843	457830	74.6479	0
H52-bin008_1	d__Bacteria	p__Patescibacteria	c__Paceibacteria	o__UBA9983_A	f__UBA1539	g__	s__	0.00270323	0.116236	0.0056159	0.00170783	0.0789456	0.181118	0.0643877	0.316162	241668	50.7042	0
H52-bin010_1	d__Bacteria	p__Planctomycetota	c__Brocadiae	o__Brocadiales	f__Brocadiaceae	g__XYD2-FULL-41-16	s__	0.00219826	0.00419508	0.0231185	0.0514947	0.0459406	0.0148273	0.0236291	0.0179798	1712298	63.3803	0
H52-bin011_1	d__Bacteria	p__Planctomycetota	c__Brocadiae	o__Brocadiales	f__Brocadiaceae	g__2-12-FULL-39-13	s__2-12-FULL-39-13 sp001824485	0.0850103	0.0716837	0.0609812	0.0127561	0.157361	0.0442523	0.0720075	0.0480514	1756939	94.3662	0
H52-bin012_1	d__Bacteria	p__Patescibacteria	c__Paceibacteria	o__UBA9983_A	f__UBA9973	g__UBA9973	s__	0.00509418	0.166475	0.0725412	0.00506908	0.225872	0.0754107	0.0917437	0.0749725	460971	69.0141	1.40845
H52-bin013_1	d__Bacteria	p__Desulfuromonadota	c__	o__	f__	g__	s__	0.00855739	0.085283	0.308331	0.129803	0.0249658	0.0695973	0.104423	0.0883764	2133640	94.3662	0
H52-bin014_1	d__Bacteria	p__Patescibacteria	c__Paceibacteria	o__UBA6257	f__MFKM01	g__MFKM01	s__	0.00637141	0.0089303	0.00301679	0.00322297	0.003644	0.0476913	0.0121461	0.126178	589828	71.831	0
H52-bin015_1	d__Archaea	p__Nanoarchaeota	c__Nanoarchaeia	o__Pacearchaeales	f__GW2011-AR1	g__JWKY01	s__	0.179316	0.0187559	0.0143123	0.0207345	0.138838	0.143383	0.0858899	0.137643	625463	50	1.31579
H52-bin018_1	d__Bacteria	p__Patescibacteria	c__Microgenomatia	o__GWA2-44-7	f__UBA8517	g__UBA12026	s__	0.0111043	0.0353956	0.174507	0.0108808	0.0296179	0.271715	0.0888702	0.40358	269082	52.1127	0
H52-bin019_1	d__Bacteria	p__Chloroflexota	c__Anaerolineae	o__Anaerolineales	f__	g__	s__	0.00689351	0.0225685	0.0237446	0.0369559	0.309884	0.0440968	0.0740239	0.0891771	1337094	54.9296	0
H52-bin020_1	d__Bacteria	p__Patescibacteria	c__Microgenomatia	o__GWA2-44-7	f__Amesbacteraceae	g__	s__	0.00754777	0.00234506	0.00374401	0.0055456	0.040614	0.118068	0.029644	0.238188	597948	60.5634	1.40845
H52-bin021_1	d__Bacteria	p__Nitrospirota	c__Nitrospiria	o__9FT-COMBO-42-15	f__9FT-COMBO-42-15	g__9FT-COMBO-42-15	s__	0.0117517	0.282961	0.0293956	0.0038356	0.738395	0.179355	0.207616	0.236163	2064677	81.6901	0
H52-bin022_1	d__Bacteria	p__Nitrospirota	c__Nitrospiria	o__HDB-SIOI813	f__HDB-SIOI813	g__RBG-16-43-11	s__RBG-16-43-11 sp001805165	0.00915102	0.0868015	0.00769314	0.0072344	0.0522674	0.017297	0.0300741	0.0273957	1281370	63.3803	2.8169
H52-bin023_1	d__Bacteria	p__Patescibacteria	c__Gracilibacteria	o__Peribacterales	f__Peribacteraceae	g__2-02-FULL-52-16	s__	0.00844299	0.00158463	0.0143895	0.00183726	0.00532361	0.00942455	0.00683376	0.0124408	1183508	84.507	0
H52-bin025_1	d__Bacteria	p__Patescibacteria	c__Doudnabacteria	o__UBA920	f__UBA920	g__PALSA-1336	s__	0.00386693	0.023074	0.17407	0.0070445	0.00286397	0.0269032	0.0396371	0.0501456	937864	59.1549	2.8169
H52-bin026_1	d__Bacteria	p__Patescibacteria	c__ABY1	o__Magasanikbacterales	f__GWA2-37-8	g__XYD2-FULL-39-9	s__	0.00104082	0.00655432	0.123016	0.00462243	0.377494	0.0831158	0.0993073	0.114487	655974	74.6479	0
H52-bin027_1	d__Bacteria	p__Chloroflexota	c__Anaerolineae	o__Anaerolineales	f__	g__	s__	0.00833744	0.0261023	0.0276818	0.0416503	0.377891	0.0529073	0.089095	0.108935	2079685	69.0141	0
H52-bin029_1	d__Bacteria	p__Patescibacteria	c__Microgenomatia	o__Shapirobacterales	f__UBA12405	g__UBA12158	s__	0.00124273	0.0042364	0.00883391	0.00750818	0.0357482	0.0351709	0.0154567	0.0585322	664830	77.4648	0
H52-bin030_1	d__Bacteria	p__Patescibacteria	c__Paceibacteria	o__UBA9983_A	f__21-14-all-36-13	g__	s__	0.0117542	0.0414897	1.20061	0.0551552	0.149692	0.3647	0.3039	0.435786	545571	73.2394	0
H52-bin031_1	d__Bacteria	p__Patescibacteria	c__Paceibacteria	o__UBA9983_A	f__Zambryskibacteraceae	g__WO2-35-19	s__	0.00477804	0.00598571	0.794746	6.01037	0.192597	2.3245	1.5555	3.51361	438576	60.5634	0
H52-bin032_1	d__Bacteria	p__Patescibacteria	c__Paceibacteria	o__UBA9983_A	f__UBA9973	g__UBA9973	s__	0.0179241	0.0750579	0.0594378	0.0772347	0.484627	0.145721	0.143334	0.190503	695415	64.7887	1.40845
H52-bin033_1	d__Bacteria	p__Patescibacteria	c__Microgenomatia	o__Levybacterales	f__UBA12049	g__	s__	0.0024917	0.00240253	0.00281631	0.0011479	0.00472733	0.0925814	0.0176945	0.23431	850808	70.4225	4.22535
H52-bin035_1	d__Bacteria	p__Patescibacteria	c__Paceibacteria	o__2-02-FULL-40-12	f__	g__	s__	0.0262242	0.0180149	0.0311726	0.0108969	0.105513	0.114649	0.0510784	0.150517	794273	80.2817	0
H52-bin036_1	d__Bacteria	p__Chloroflexota	c__Dehalococcoidia	o__SM23-28-2	f__	g__	s__	0.0227799	0.0822194	0.0587307	0.0851395	0.147565	0.0426793	0.0731856	0.0467716	602907	53.5211	0
H52-bin037_1	d__Bacteria	p__Patescibacteria	c__Microgenomatia	o__UBA10105	f__UBA927	g__	s__	0.00065391	0.119358	0.00727209	0.0849071	0.0386162	0.0576561	0.0514107	0.0461971	836174	83.0986	0
H52-bin038_1	d__Bacteria	p__Patescibacteria	c__Paceibacteria	o__UBA9983_A	f__UBA2163	g__C7867-001	s__	0.00259366	0.0952998	0.000577883	0.00133382	0.0250569	0.0263827	0.0252075	0.0354956	476681	61.9718	0
H52-bin041_1	d__Bacteria	p__Elusimicrobiota	c__Elusimicrobia	o__UBA1565	f__UBA9628	g__UBA9628	s__	0.0166491	0.0433668	0.00558698	0.0033062	0.0277232	0.0112269	0.0179765	0.0134041	1501452	50.7042	1.40845
H52-bin043_1	d__Bacteria	p__Patescibacteria	c__Paceibacteria	o__UBA9983_A	f__UBA11359_A	g__UBA10002	s__	0.00421602	0.0887484	0.00538018	0.0644872	0.0390866	0.0222944	0.0373688	0.0295861	883345	64.7887	0
H52-bin045_1	d__Bacteria	p__Patescibacteria	c__ABY1	o__SG8-24	f__GWF2-40-263	g__XYB2-FULL-45-11	s__	0.00103837	0.0798828	0.000448919	0.00078198	0.00106157	0.00870714	0.0153201	0.0237327	709671	56.338	1.40845
H52-bin046_1	d__Archaea	p__Iainarchaeota	c__Iainarchaeia	o__Iainarchaeales	f__0-14-0-20-34-12	g__0-14-0-20-34-12	s__	0.000409905	0.00222919	0.00568826	0.0606415	0.0650296	0.0145852	0.0247639	0.0242027	1169422	92.1053	1.31579
H52-bin047_1	d__Bacteria	p__Patescibacteria	c__Gracilibacteria	o__Peribacterales	f__Peribacteraceae	g__2-12-FULL-55-11	s__	0.00890251	0.000915017	0.000249882	0.0024587	0.100899	0.0137565	0.021197	0.0293732	1133635	66.1972	0
H52-bin049_1	d__Bacteria	p__Proteobacteria	c__Gammaproteobacteria	o__Acidiferrobacterales	f__UBA6901	g__	s__	0.0154774	0.0879332	0.00256779	0.00511187	0.0205845	0.0714132	0.033848	0.110926	923691	56.338	0
H52-bin050_1	d__Bacteria	p__Patescibacteria	c__Microgenomatia	o__Levybacterales	f__UBA12049	g__2-01-FULL-38-21	s__	0.0734929	0.0140812	0.00940903	0.0109353	0.0131042	0.128126	0.0415247	0.228863	880795	70.4225	2.8169
H52-bin051_1	d__Bacteria	p__Patescibacteria	c__Microgenomatia	o__GWA2-44-7	f__UBA8517	g__UBA12026	s__	0.00172517	0.0875006	0.0844369	0.00266167	0.132671	0.325973	0.105828	0.473258	581055	71.831	0
H52-bin052_1	d__Bacteria	p__Patescibacteria	c__Paceibacteria	o__UBA9983_A	f__UBA1539	g__	s__	0.00491165	0.258775	0.0379432	0.00224525	0.0045303	0.204403	0.0854681	0.428513	701876	76.0563	0
H52-bin055_1	d__Bacteria	p__Patescibacteria	c__Paceibacteria	o__UBA9983_A	f__UBA1539	g__	s__	0.00180862	0.135574	0.00940371	0.00115441	0.0193263	0.0767268	0.0406656	0.145344	428198	60.5634	0
H52-bin056	d__Bacteria	p__Patescibacteria	c__Paceibacteria	o__UBA6257	f__UBA9933	g__	s__	0.00659728	0.0161298	0.0381335	0.00990112	0.102576	0.197056	0.0617322	0.295226	593348	71.831	0
H52-bin057_1	d__Bacteria	p__Nitrospirota	c__RBG-16-64-22	o__RBG-16-64-22	f__RBG-16-64-22	g__RBG-16-64-22	s__	0.00610235	0.620322	0.0118785	0.00343367	0.0540897	0.0733687	0.128199	0.182943	2861825	97.1831	0
H52-bin058_1	d__Bacteria	p__Planctomycetota	c__Brocadiae	o__Brocadiales	f__Brocadiaceae	g__XYD2-FULL-41-16	s__	0.00318788	0.00320095	0.0213691	0.0417681	0.0408136	0.0128006	0.0205234	0.0152511	1054326	60.5634	0
H52-bin059_1	d__Bacteria	p__Patescibacteria	c__Paceibacteria	o__UBA9983_A	f__UBA9973	g__UBA9973	s__	0.0101658	0.0442167	0.02025	0.00422893	0.0475266	0.0633773	0.0316276	0.0874019	521524	70.4225	0
H52-bin060_1	d__Bacteria	p__Proteobacteria	c__Gammaproteobacteria	o__Burkholderiales	f__Rhodocyclaceae	g__Sterolibacterium	s__	0.108049	0.0746235	0.0813076	0.00915738	0.0218367	0.0385912	0.0555943	0.0381878	1715393	53.5211	0
H52-bin061_1	d__Bacteria	p__Patescibacteria	c__Paceibacteria	o__UBA6257	f__02-FULL-45-10c	g__02-FULL-45-10c	s__	0.00293818	0.00607668	0.0719346	0.0506193	0.106114	0.0648791	0.0504271	0.053576	625990	54.9296	0
H52-bin062_1	d__Bacteria	p__Patescibacteria	c__Microgenomatia	o__Levybacterales	f__UBA12049	g__	s__	0.0289539	0.00224779	0.000660923	0.0066274	0.00323418	0.107233	0.0248263	0.26518	1079409	80.2817	1.40845
H52-bin063_1	d__Bacteria	p__Patescibacteria	c__Paceibacteria	o__UBA9983_A	f__UBA2163	g__UBA10103	s__	0.0115639	0.193799	0.00446594	0.00250856	0.0715803	0.0568457	0.056794	0.071843	630988	63.3803	0
H52-bin068_1	d__Bacteria	p__Actinobacteriota	c__Acidimicrobiia	o__UBA5794	f__UBA11373	g__UBA11373	s__	0.0033065	0.0341064	0.0065341	0.00851109	0.162233	0.0242489	0.0398234	0.0468567	1399910	77.4648	0
H52-bin069_1	d__Bacteria	p__Patescibacteria	c__Paceibacteria	o__UBA9983_A	f__XYD1-FULL-46-19	g__XYD1-FULL-44-32	s__	0.00115663	0.000459381	0.00019796	0.000974842	0.0216262	0.0285026	0.00881959	0.0534578	590650	56.338	0
H52-bin072_1	d__Bacteria	p__Patescibacteria	c__Paceibacteria	o__UBA9983_A	f__UBA2163	g__UBA10103	s__	0.0182119	0.00119512	0.059717	0.0301441	0.109471	0.0521802	0.0451531	0.0496178	763877	59.1549	0
H52-bin073_1	d__Bacteria	p__Patescibacteria	c__ABY1	o__UBA9570	f__	g__	s__	0.00769141	0.0733046	0.00873215	0.0137904	0.0235159	0.0161522	0.0238644	0.0198729	657249	69.0141	1.40845
H52-bin077_1	d__Archaea	p__Nanoarchaeota	c__Nanoarchaeia	o__SCGC-AAA011-G17	f__GW2011-AR18	g__GW2011-AR18	s__	0.0077571	0.0106616	0.00990312	0.00405987	0.0373507	0.0286383	0.0163951	0.0350657	801723	68.4211	0
H52-bin078_1	d__Bacteria	p__Patescibacteria	c__ABY1	o__SG8-24	f__GWF2-40-263	g__UBA12478	s__	0.0152942	0.0666918	0.0306236	0.0188756	0.173698	0.0323713	0.0562591	0.0507583	1092722	85.9155	1.40845
H52-bin079	d__Bacteria	p__Patescibacteria	c__Paceibacteria	o__UBA9983_A	f__UBA9988	g__	s__	0.00205442	0.0247514	0.00688741	0.00141421	0.0145896	0.0380656	0.0146271	0.0712929	794428	73.2394	1.40845
H52-bin081_1	d__Bacteria	p__Patescibacteria	c__Gracilibacteria	o__UBA1369	f__UM-FILTER-53-11	g__	s__	0.00245117	0.11757	0.156653	0.0208364	0.248001	0.0618526	0.101227	0.079948	1023903	61.9718	0
H52-bin082_1	d__Bacteria	p__Patescibacteria	c__Paceibacteria	o__UBA9983_A	f__UBA9988	g__	s__	0.00132387	0.00920351	0.00140014	0.000934314	0.123263	0.0204143	0.0260898	0.0371935	566859	57.7465	0
H52-bin083_1	d__Bacteria	p__Desulfobacterota	c__Syntrophia	o__Syntrophales	f__UBA5619	g__UBA5619	s__	0.00150992	0.000851389	0.0595248	0.0183626	0.107605	0.0209032	0.0347928	0.033484	1843794	83.0986	0
H52-bin084_1	d__Archaea	p__Nanoarchaeota	c__Nanoarchaeia	o__Woesearchaeales	f__GW2011-AR4	g__GCA-2688775	s__	0.00781304	0.00514322	0.0438968	0.00178446	0.0250647	0.0106751	0.0157295	0.0127997	1283103	81.5789	2.63158
H52-bin085_1	d__Bacteria	p__Patescibacteria	c__Gracilibacteria	o__UBA1369	f__LOWO2-01-FULL-3	g__	s__	0.000484118	0.0158057	0.019705	0.00631669	0.169871	0.0251446	0.0395544	0.0492434	617879	50.7042	0
H52-bin087_1	d__Archaea	p__Nanoarchaeota	c__Nanoarchaeia	o__Woesearchaeales	f__	g__	s__	0.00202514	0.00200465	0.000782259	0.00214544	0.169552	0.0189605	0.0325784	0.0502329	2023882	71.0526	3.94737
H52-bin088_1	d__Bacteria	p__Patescibacteria	c__Paceibacteria	o__2-01-FULL-47-10	f__	g__	s__	0.000202008	0.000252305	0.00469371	0.000384406	0.00767947	0.00555505	0.00312782	0.00904659	502615	63.3803	1.40845
H52-bin089_1	d__Bacteria	p__Patescibacteria	c__ABY1	o__GWA2-46-9	f__	g__	s__	0.00562185	0.0200848	0.0223066	0.0130702	0.126005	0.0199613	0.0345082	0.0361069	1043207	78.8732	0
H52-bin091_1	d__Bacteria	p__Patescibacteria	c__ABY1	o__Magasanikbacterales	f__UBA922	g__	s__	0.00105155	0.00038352	0.000114868	0.000349447	0.000383894	0.000984231	0.000544585	0.00156021	962092	80.2817	0
H52-bin092_1	d__Bacteria	p__Patescibacteria	c__Doudnabacteria	o__UBA920	f__UBA920	g__PALSA-1336	s__	0.00258421	0.000872255	0.00211362	0.000650586	0.0010448	0.004281	0.00192441	0.00781121	1026034	78.8732	1.40845
H52-bin093_1	d__Archaea	p__Micrarchaeota	c__Micrarchaeia	o__UBA10214	f__UBA10214	g__	s__	0.00223632	0.00260909	0.00189944	0.00106311	0.0133162	0.00251054	0.00393912	0.00367893	1515479	94.7368	0
H52-bin094_1	d__Bacteria	p__MBNT15	c__MBNT15	o__MBNT15	f__MBNT15	g__CG2-30-66-27	s__	0.0101886	0.0325592	0.236451	0.208931	0.122655	0.0646368	0.11257	0.0862375	1903112	83.0986	1.40845
H52-bin095_1	d__Bacteria	p__Patescibacteria	c__Paceibacteria	o__UBA6257	f__UBA9933	g__	s__	0.0451552	2.18577	0.0125198	0.0186116	0.253355	2.09205	0.76791	4.9089	502359	74.6479	0
H52-bin098_1	d__Bacteria	p__Patescibacteria	c__Paceibacteria	o__UBA6257	f__UBA9933	g__	s__	0.00222204	0.0257473	0.00127699	0.00169836	0.00373045	0.0611987	0.015979	0.154231	408391	66.1972	0
H52-bin101_1	d__Bacteria	p__Bdellovibrionota	c__Bacteriovoracia	o__Bacteriovoracales	f__Bacteriovoracaceae	g__GWA2-49-15	s__	0.0254872	0.00947986	0.0211117	0.0054254	0.135951	0.0286528	0.0376847	0.0402525	3043344	71.831	0
H52-bin102_1	d__Bacteria	p__Chloroflexota	c__Dehalococcoidia	o__SM23-28-2	f__	g__	s__	0.0275753	0.109926	0.0748759	0.108013	0.189484	0.0548745	0.0941249	0.0603664	1265237	69.0141	0
H52-bin103_1	d__Bacteria	p__Patescibacteria	c__Paceibacteria	o__GWA2-38-13b	f__GWA2-38-13b	g__GWA2-38-13b	s__	0.0017421	0.0469554	0.100816	0.648162	0.112584	0.108525	0.169798	0.183578	808814	74.6479	1.40845
H52-bin106_1	d__Bacteria	p__Patescibacteria	c__Paceibacteria	o__UBA6257	f__Colwellbacteraceae	g__2-12-FULL-43-11	s__	0.0107156	0.00553307	0.00263285	0.00303496	0.179254	0.045113	0.0410473	0.0614395	327486	54.9296	0
H52-bin107_1	d__Bacteria	p__Planctomycetota	c__Phycisphaerae	o__UBA1845	f__UBA1845	g__	s__	0.00715332	0.00501206	0.0313588	0.0116174	0.165781	0.0236275	0.0407584	0.0481314	3810985	92.9577	0
H52-bin111_1	d__Bacteria	p__Patescibacteria	c__ABY1	o__UBA10025	f__PEXW01	g__PEXW01	s__	0.00202777	0.0514875	0.00888427	0.00328182	0.00566835	0.034084	0.0175723	0.0628506	895133	87.3239	0
H52-bin113_1	d__Bacteria	p__Patescibacteria	c__Microgenomatia	o__UBA10105	f__UBA927	g__	s__	0.000847243	0.0254279	0.0116175	0.00934816	0.0193956	0.0125021	0.0131898	0.00985232	1221354	73.2394	0
H52-bin115_1	d__Bacteria	p__Patescibacteria	c__Microgenomatia	o__UBA10105	f__UBA927	g__MFJZ01	s__	0.000666595	0.0325893	0.0078793	0.00583358	0.02908	0.016683	0.0154553	0.0166642	871337	61.9718	0
H52-bin116_1	d__Bacteria	p__Patescibacteria	c__Gracilibacteria	o__UBA1369	f__2-02-FULL-48-14	g__	s__	0.0375956	0.0560065	0.0278724	0.0304422	0.0153317	0.0215363	0.0314641	0.0166382	456512	53.5211	0
H52-bin117_1	d__Bacteria	p__Proteobacteria	c__Gammaproteobacteria	o__Acidiferrobacterales	f__UBA6901	g__UBA6901	s__	0.0179913	0.0972934	0.00309062	0.00543256	0.0246164	0.07444	0.037144	0.111779	877653	52.1127	0
H52-bin118_1	d__Bacteria	p__Proteobacteria	c__Gammaproteobacteria	o__Acidiferrobacterales	f__Sulfurifustaceae	g__SM1-46	s__	0.0336374	0.457492	0.00984086	0.00708285	0.0967826	0.149443	0.125713	0.196411	2229325	95.7746	0
H52-bin120_1	d__Bacteria	p__Patescibacteria	c__Paceibacteria	o__UBA6257	f__UBA9933	g__	s__	0.0894249	0.298989	0.0224505	0.0322279	0.0522437	0.887103	0.230407	2.33726	639094	70.4225	0
H52-bin121_1	d__Bacteria	p__Elusimicrobiota	c__Elusimicrobia	o__UBA1565	f__UBA1565	g__	s__	0.25309	0.0663626	0.0355677	0.0655929	0.051577	0.0529527	0.0875238	0.0716484	1428654	54.9296	0
H52-bin123_1	d__Bacteria	p__Patescibacteria	c__Paceibacteria	o__UBA6257	f__UBA9933	g__	s__	0.00455029	0.55441	0.0489312	0.00428245	0.00985315	0.174274	0.132717	0.269035	537150	71.831	0
H52-bin124_1	d__Bacteria	p__Patescibacteria	c__Paceibacteria	o__UBA9983_A	f__UBA2163	g__	s__	0.0290916	0.00141355	0.0095804	0.00316417	0.0500788	0.0517854	0.0241857	0.0610416	767408	66.1972	1.40845
H52-bin125_1	d__Bacteria	p__Planctomycetota	c__Brocadiae	o__Brocadiales	f__Brocadiaceae	g__XYD2-FULL-41-16	s__	0.00463813	0.0040433	0.0297842	0.0630421	0.060559	0.0185676	0.0301057	0.0229177	1706225	64.7887	0
H52-bin126_1	d__Archaea	p__Nanoarchaeota	c__Nanoarchaeia	o__Pacearchaeales	f__UBA73	g__1-14-0-10-34-76	s__	0.00387389	0.101502	0.00699549	0.0035821	0.0164587	0.257328	0.0649566	0.663807	908913	52.6316	0
H52-bin127_1	d__Bacteria	p__Patescibacteria	c__Paceibacteria	o__UBA9983_A	f__UBA1539	g__	s__	0.00232319	0.104973	0.0088004	0.00170165	0.0597862	0.160862	0.0564077	0.382586	466138	67.6056	1.40845
H52-bin129_1	d__Bacteria	p__Chloroflexota	c__Anaerolineae	o__Anaerolineales	f__	g__	s__	0.0101908	0.0287301	0.0294849	0.0465264	0.400797	0.0565364	0.0953777	0.115465	2626201	69.0141	1.40845
H52-bin130_1	d__Bacteria	p__Patescibacteria	c__Paceibacteria	o__UBA9983_A	f__GWA1-40-21	g__GWA1-40-21	s__	0.00677468	0.0170087	0.121027	0.00841734	0.00961912	0.0814683	0.0407191	0.169931	443353	57.7465	0
H52-bin131_1	d__Bacteria	p__Patescibacteria	c__Microgenomatia	o__UBA1406	f__GWC2-37-13	g__GWC2-37-13	s__	0.000427525	0.0818901	0.0911443	0.0992499	0.0170137	0.0415121	0.0552063	0.0361344	730066	54.9296	0
H52-bin132_1	d__Bacteria	p__Patescibacteria	c__Paceibacteria	o__UBA9983_A	f__GWA1-40-21	g__GWA1-40-21	s__	0.0615121	0.0326804	0.0454228	0.0220302	0.114925	0.0746104	0.0585302	0.0711468	477863	63.3803	0
H52-bin133_1	d__Bacteria	p__Patescibacteria	c__Paceibacteria	o__UBA9983_A	f__UBA1539	g__	s__	0.00187299	0.0262673	0.0283429	0.00804081	0.126204	0.0648087	0.0425895	0.0862081	456058	70.4225	0
H52-bin134_1	d__Bacteria	p__Patescibacteria	c__ABY1	o__SG8-24	f__UBA9934	g__UBA11707	s__	0.267205	0.061671	0.00750399	0.0106042	0.0539639	0.0586593	0.0766013	0.0770675	616890	60.5634	0
H52-bin135_1	d__Bacteria	p__Nitrospirota	c__Nitrospiria	o__HDB-SIOI813	f__HDB-SIOI813	g__RBG-16-43-11	s__	0.0124854	0.119353	0.0100859	0.00911115	0.0718447	0.0240558	0.0411561	0.0375443	1765215	80.2817	0
H52-bin137_1	d__Bacteria	p__Patescibacteria	c__Paceibacteria	o__UBA9983_A	f__UBA9973	g__UBA9973	s__	0.00760677	0.00416638	0.00758714	0.0039207	0.0124952	0.0334215	0.0115329	0.0725585	593932	56.338	0
H52-bin138_1_1	d__Bacteria	p__Actinobacteriota	c__Actinobacteria	o__Nanopelagicales	f__Nanopelagicaceae	g__	s__	0.0194464	0.242901	0.0878666	0.00833383	0.0814952	0.0491224	0.0815276	0.0709695	1628632	90.1408	0
H52-bin142_1	d__Bacteria	p__Bacteroidota	c__Ignavibacteria	o__Ignavibacteriales	f__Melioribacteraceae	g__Fen-1258	s__	0.00274283	0.0171892	0.0587047	0.0641489	0.108414	0.0264399	0.0462732	0.0355907	1525026	66.1972	0
H52-bin143_1	d__Bacteria	p__GWC2-55-46	c__GWC2-55-46	o__GWC2-55-46	f__	g__	s__	0.00130093	0.453204	0.0098309	0.00225263	0.0147361	0.0498072	0.088522	0.134553	2138081	90.1408	0
H52-bin144_1	d__Bacteria	p__Actinobacteriota	c__Thermoleophilia	o__BMS3ABIN01	f__BMS3ABIN01	g__	s__	0.00938928	0.00679589	0.0753407	0.0306831	0.0406533	0.0179268	0.0301315	0.0229548	1342079	52.1127	1.40845
H52-bin146_1	d__Bacteria	p__Patescibacteria	c__Gracilibacteria	o__UBA1369	f__UBA1369	g__	s__	0.0508915	0.125736	0.00608882	0.00131711	0.0470653	0.0255515	0.042775	0.0380857	931803	67.6056	2.8169
H52-bin147_1	d__Bacteria	p__Patescibacteria	c__Paceibacteria	o__GWC2-36-17	f__M10-OD1-4	g__MEYI01	s__	0.00206246	0.0548364	0.212028	0.0098647	0.00593209	0.0527336	0.0562429	0.0675166	470603	73.2394	0
H52-bin148_1	d__Bacteria	p__Patescibacteria	c__ABY1	o__UBA9570	f__	g__	s__	0.161964	0.0050102	0.000146502	0.00361381	0.0102832	0.0266808	0.0346164	0.0504835	852075	59.1549	1.40845
H52-bin149_1	d__Bacteria	p__Patescibacteria	c__Saccharimonadia	o__Saccharimonadales	f__	g__	s__	0.00128691	0.00112663	0.000802163	0.00181685	0.0183919	0.00660942	0.00500564	0.00869524	705240	64.7887	0
H52-bin151_1	d__Bacteria	p__Patescibacteria	c__Paceibacteria	o__UBA6257	f__GWB1-50-10	g__	s__	0.00041313	0.000283266	0.000189474	0.000300995	0.000601745	0.0211162	0.00381747	0.0605584	584896	50.7042	0
H52-bin155_1	d__Archaea	p__Nanoarchaeota	c__Nanoarchaeia	o__Woesearchaeales	f__GW2011-AR9	g__GCA-002792115	s__	0.000964299	0.00173199	0.0028873	0.00168202	0.0400456	0.0118891	0.00986672	0.0161471	1373200	72.3684	1.31579
H52-bin156_1	d__Bacteria	p__Patescibacteria	c__ABY1	o__SG8-24	f__UBA11717	g__2-02-FULL-53-10	s__	0.00058019	0.00324233	0.0159866	0.014707	0.0969136	0.0167818	0.0247019	0.0277621	844826	61.9718	0
H52-bin157_1	d__Bacteria	p__Omnitrophota	c__koll11	o__GIF10	f__UBA12090	g__UBA12090	s__	0.0447205	0.0467346	0.026898	0.139908	0.111419	0.0485833	0.0697105	0.0420399	1737075	84.507	0
H52-bin159	d__Bacteria	p__Bacteroidota	c__Ignavibacteria	o__Ignavibacteriales	f__Melioribacteraceae	g__Fen-1258	s__	0.00100906	0.00422475	0.0154142	0.00472738	0.0549574	0.00875399	0.0148478	0.0159565	4588353	67.6056	7.04225
H52-bin160_1	d__Bacteria	p__Patescibacteria	c__ABY1	o__Veblenbacterales	f__UBA10138	g__	s__	0.00134251	0.0184517	0.00283134	0.00114053	0.0706825	0.015422	0.0183118	0.0216832	972462	73.2394	1.40845
H52-bin161_1	d__Bacteria	p__Bacteroidota	c__UBA10030	o__	f__	g__	s__	0.000332698	4.85477e-05	0.000162739	0.0203715	0.00140594	0.00288915	0.00420175	0.00589497	1806182	64.7887	0
H52-bin162_1	d__Bacteria	p__Firestonebacteria	c__D2-FULL-39-29	o__	f__	g__	s__	0.00518378	0.00960493	0.0143904	0.0078041	0.0355945	0.00840798	0.0134976	0.00989688	2812258	90.1408	1.40845
H52-bin163_1	d__Archaea	p__Micrarchaeota	c__Micrarchaeia	o__UBA10214	f__UBA10214	g__UBA10214	s__	0.000617659	0.00133744	0.000878607	0.0042941	0.11888	0.0176095	0.0239362	0.0350064	1200822	92.1053	0
Omni_Hai_III	d__Bacteria	p__Omnitrophota	c__koll11	o__GIF10	f__UBA12090	g__	s__	2.02622	0.031746	0.000763615	0.00319027	0.00838022	0.294813	0.394186	0.633048	936488	64.7887	0
Omni_Hai_IV	d__Bacteria	p__Omnitrophota	c__koll11	o__GIF10	f__UBA12090	g__	s__	1.61278	0.014464	0.000555705	0.00268417	0.00592753	0.235875	0.312048	0.506575	1217049	54.9296	4.22535
Omni_Hai_IX	d__Bacteria	p__Omnitrophota	c__koll11	o__UBA9649	f__UBA9649	g__	s__	0.330545	0.184415	0.0192609	0.00894339	0.268368	0.0951239	0.151109	0.119456	912713	60.5634	0
Omni_Hai_V	d__Bacteria	p__Omnitrophota	c__koll11	o__UBA10183	f__	g__	s__	1.77985	0.0348096	0.00395544	0.02049	0.0514162	0.247518	0.356339	0.538436	3297932	88.7324	2.8169
Omni_Hai_VI	d__Bacteria	p__Omnitrophota	c__koll11	o__UBA10015	f__kpj58rc	g__UBA10015	s__	0.942323	0.321293	0.0133157	0.0269835	0.126992	0.168703	0.266602	0.280346	365367	53.5211	1.40845
Omni_Hai_VIII	d__Bacteria	p__Omnitrophota	c__koll11	o__GIF10	f__UBA12090	g__	s__	0.0535925	0.134015	0.0477138	0.0132572	0.114684	0.0435196	0.067797	0.0439773	585985	50.7042	0
Omni_Hai_X	d__Bacteria	p__Omnitrophota	c__koll11	o__UBA10015	f__kpj58rc	g__O2-FULL-52-10	s__	0.0019463	0.164058	0.00597733	0.0236523	0.0871491	0.0290544	0.0519729	0.051675	1296205	63.3803	4.22535
Omni_Hai_XIII	d__Bacteria	p__Omnitrophota	c__koll11	o__GIF10	f__UBA6249	g__	s__	0.000434923	0.00411242	0.305929	0.388141	0.138307	0.0872786	0.154034	0.13707	1144951	84.507	2.8169
Omni_Hai_XLI	d__Bacteria	p__Omnitrophota	c__koll11	o__GIF10	f__UBA12090	g__	s__	0.0692282	0.149309	0.0577371	0.0170053	0.134388	0.0504636	0.0796886	0.0503094	847815	61.9718	0
Omni_Hai_XLII	d__Bacteria	p__Omnitrophota	c__koll11	o__UBA10015	f__kpj58rc	g__O2-FULL-52-10	s__	0.00408151	0.211979	0.00748747	0.0298305	0.123611	0.0389428	0.0693221	0.0679049	1301403	81.6901	2.8169
Omni_Hai_XLIII	d__Bacteria	p__Omnitrophota	c__koll11	o__UBA10015	f__kpj58rc	g__	s__	0.00367048	0.165358	0.00313726	0.00445423	0.147885	0.0334976	0.0596671	0.0617163	1441421	57.7465	2.8169
Omni_Hai_XV	d__Bacteria	p__Omnitrophota	c__koll11	o__GIF10	f__UBA12090	g__	s__	0.109475	0.103227	0.0881962	0.0342761	0.14284	0.0575823	0.0892661	0.047716	984227	50.7042	0
Omni_Hai_XVI	d__Bacteria	p__Omnitrophota	c__koll11	o__GIF10	f__UBA6249	g__GCA-002774445	s__	0.000944643	0.0102302	0.191998	0.00378598	0.00129393	0.022569	0.0384703	0.0566935	1325212	83.0986	0
Omni_Hai_XVII	d__Bacteria	p__Omnitrophota	c__koll11	o__1-14-0-20-42-13	f__1-14-0-20-42-13	g__	s__	0.000370337	0.0178688	0.127832	0.0198178	0.135353	0.0326103	0.055642	0.0500142	748584	57.7465	0
Omni_Hai_XX	d__Bacteria	p__Omnitrophota	c__koll11	o__GIF10	f__UBA6249	g__	s__	0.000339066	0.00147108	0.00311035	0.267257	0.00261899	0.0277439	0.0504235	0.0798448	1211366	74.6479	1.40845
Omni_Hai_XXI	d__Bacteria	p__Omnitrophota	c__koll11	o__GIF10	f__UBA12090	g__	s__	0.031064	0.00116888	0.00401028	0.356333	0.000959187	0.0410113	0.0724244	0.105506	1788000	92.9577	1.40845
Omni_Hai_XXII	d__Bacteria	p__Omnitrophota	c__koll11	o__GIF10	f__UBA12090	g__UBA12090	s__	0.0148674	0.039293	0.0172616	0.162445	0.090043	0.0355256	0.0599058	0.0492054	887732	53.5211	0
Omni_Hai_XXIII	d__Bacteria	p__Omnitrophota	c__koll11	o__GIF10	f__UBA6249	g__UBA6249	s__	0.00107088	0.00427635	0.606563	0.740066	0.142595	0.155851	0.27507	0.263626	1163092	88.7324	1.40845
Omni_Hai_XXIX	d__Bacteria	p__Omnitrophota	c__koll11	o__UBA9649	f__UBA9649	g__	s__	0.380107	0.157423	0.0214234	0.00993815	0.310055	0.10443	0.163896	0.13468	779933	50.7042	1.40845
Omni_Hai_XXV	d__Bacteria	p__Omnitrophota	c__koll11	o__UBA10183	f__UBA10183	g__UBA10183	s__	0.00111078	0.0387516	0.0236595	0.53778	0.0485311	0.0658786	0.119285	0.158193	1042554	61.9718	0
Omni_Hai_XXVI	d__Bacteria	p__Omnitrophota	c__koll11	o__GIF10	f__UBA6249	g__	s__	0.00407073	0.00373485	0.0530044	2.53837	0.00554758	0.262595	0.477886	0.758738	1467449	91.5493	1.40845
Omni_Hai_XXX	d__Bacteria	p__Omnitrophota	c__koll11	o__UBA10015	f__kpj58rc	g__	s__	0.00119732	0.0480802	0.0349122	0.000791889	0.279353	0.0371977	0.066922	0.082311	2082950	77.4648	4.22535
Omni_Hai_XXXII	d__Bacteria	p__Omnitrophota	c__koll11	o__2-02-FULL-51-18	f__	g__	s__	0.00244791	0.0557286	0.0015826	0.00099674	0.293908	0.0363667	0.0651717	0.0873583	1445959	77.4648	2.8169
Omni_Hai_XXXIII	d__Bacteria	p__Omnitrophota	c__koll11	o__UBA9649	f__UBA9649	g__2-02-FULL-67-20	s__	0.447941	0.12712	0.0151244	0.014862	0.294048	0.106105	0.167533	0.146574	747265	52.1127	0
Omni_Hai_XXXVI	d__Bacteria	p__Omnitrophota	c__koll11	o__UBA10015	f__kpj58rc	g__UBA10015	s__	0.0669513	1.04267	0.0310607	0.0321075	0.172123	0.14214	0.247842	0.30415	549597	59.1549	0
Omni_Hai_XXXVII	d__Bacteria	p__Omnitrophota	c__koll11	o__UBA10015	f__kpj58rc	g__UBA10015	s__	0.0742401	1.24583	0.0359607	0.0351678	0.19618	0.167468	0.292474	0.363773	605411	57.7465	0
Omni_Hai_XXXVIII	d__Bacteria	p__Omnitrophota	c__koll11	o__UBA10015	f__kpj58rc	g__2-02-FULL-48-11	s__	0.00352842	0.0439922	0.00335693	0.00428656	0.0211371	0.00863232	0.0141556	0.0130882	2476460	88.7324	0

## Sheet: Table S4
Table S4: KEGG genes and pathways related to the biofilm cycle, biogeochemical cycling (carbon, nitrogen, sulfur, iron), and ATPases observed for both actively and non-actively replicating MAGs (based on iREP) of attached communities, generated by DRAM and METABOLIC-G, and compared in Figures 2, 3B, 3C, 4, and 5.
Functional categories	Motility				Chemotaxis		Attachment					Quorum sensing				Biofilm formation							Biofilm degradation							Nutrient transporters							Iron cycling		Nitrogen cycling										Sulphur cycling
gene_id	K02396	K02410	K02416	K02417	K02556	K02557	K12541	K12542	K12543	K02396	K10961	K07173	K15580	K15581	K15583	K05111	K02025	K02026	M00060	M00866	M00854	M00892	GH13	GH5	K01187	K01190	PL5	PL1	K12537	ccmABC	FE.APS	K10111	K02575	K01011	K2031	K01992 efflux pumps			K02586, K02588, K02591	K10944-10946	K10535	K00370, K00371, K00374	K02567, K02568	K00362, K00363	K03385,K15876	K00368, K15864	K04561, K02305	K00376	K003810, K00381, K00392
gene_description	flagellar hook-associated protein 1 FlgK	flagellar motor switch protein FliG	flagellar motor switch protein FliM	flagellar motor switch protein FliN/FliY	chemotaxis protein MotA	chemotaxis protein MotB	lapB; ATP-binding cassette, subfamily C, bacterial LapB	lapC; membrane fusion protein LapC	lapE; outer membrane protein LapE	Type3SS	Pilus	AHL-mediated quorum sensing	oppA; oligopeptide transport system substrate-binding protein	oppB; oligopeptide transport system permease protein	oppD; oligopeptide transport system ATP-binding protein	biofilm formation: vibrio cholerae	biofilm formation: Pseudomonas aeruginosa	Biofilm formation:E.coli	KDO2-lipid A biosynthesis, Raetz pathway, LpxL-LpxM type	KDO2-lipid A biosynthesis, Raetz pathway, non-LpxL-LpxM type	Glycogen biosynthesis, glucose-1P => glycogen/starch	UDP-N-acetyl-D-glucosamine biosynthesis, eukaryotes, glucose => UDP-GlcNAc	alpha-amylase	cellulase	beta/alpha-glucosidase	beta/alpha-galactosidase	PL5 alginate lyase (EC 4.2.2.3).	PL1 pectate lyase (EC 4.2.2.2); exo-pectate lyase (EC 4.2.2.9); pectin lyase (EC 4.2.2.10).	hasE; protease secretion protein HasE	Fe2+ transporters	Fe3+ transporters	Multiple sugar transport	SO42-/S2O32- transporter	NO3-/ NO2- transporters	Nickel peptide	Na-H+ antiporter	Cyc1	DmkAB, MtrBC, DFE_complex	nifDKH	amoCAB	Hao	nxrAB|narGHI	napAB	nirBD	nrfAH	nirK| nirs	norBC	nosZ	cysJI/sir
module	Flagellar Assembly	Flagellar Assembly	Flagellar Assembly	Flagellar Assembly	Flagellar Assembly	Flagellar Assembly	Adhesin protein transport system (Type1SS)	Adhesin protein transport system (Type1SS)	Adhesin protein transport system (Type1SS)	Flagellar hook	Pathogenicity	Luxs	Oligopeptide transport system	Oligopeptide transport system	Oligopeptide transport system				Lipopolysaccharide metabolism	Lipopolysaccharide metabolism	Other carbohydrate metabolism		Glycoside Hydrolases	Glycoside Hydrolases	Glycoside Hydrolases	Glycoside Hydrolases	Polysaccharide Lyases	Polysaccharide Lyases	Hemophore/metalloprotease transport system								Fe2+ => Fe3+	Fe3+ => Fe2+											Sulphate reduction (assimilatory and dissimilatory)
header	Flagella Structure	Flagella Structure	Flagella Structure	Flagella Structure	Flagella Structure	Flagella Structure																	CAZY	CAZY	CAZY	CAZY	CAZY	CAZY									Iron oxidation	Iron reduction series genes
MAGs having genes	387	353	344	352	361	420	137	170	137	387	444	308	78	70	8	424	293	308	345	290	227	299	397	140	140	62	10	103	112	302	237	103	333	162	297	113	256	551	50	34	23	224	95	48	69	209	234	131	193
Total number of MAGs	605	605	605	605	605	605	605	605	605	605	605	605	605	605	605	605	605	605	605	605	605	605	605	605	605	605	605	605	605	605	605	605	605	605	605	605	605	605	605	605	605	605	605	605	605	605	605	605	605
Percentage_MAGs with functions (%)	63.97	58.35	56.86	58.18	59.67	69.42	22.64	28.1	22.64	63.97	73.39	50.91	12.89	11.57	1.32	70.08	48.43	50.91	57.02	47.93	37.52	49.42	65.62	23.14	23.14	10.25	1.65	17.02	18.51	49.92	39.17	17.02	55.04	26.78	49.09	18.68	42.31	91.07	8.25083	5.61056	3.79538	36.9637	15.6766	7.92079	11.3861	34.4884	38.6139	21.6172	31.8482
PS41_06_1_bin.1	0	0	0	0	0	0	0	0	0	0	0	0	0	0	0	0	0	0	0	0	0	0	0	0	0	0	0	0	0	1	0	0	1	1	0	0	0	0	0	0	0	0	0	0	0	1	0	0	0
PS41_06_1_bin.11	2	1	0	2	0	1	0	0	0	2	1	0	0	0	0	1	0	0	1	1	0	0	0	1	1	0	0	0	1	1	1	0	1	0	0	0	0	1	0	0	0	1	0	0	0	0	0	0	1
PS41_06_1_bin.12	1	1	1	1	2	2	1	1	1	1	1	1	0	0	0	1	1	1	1	0	0	1	5	0	0	0	0	0	0	1	1	0	1	1	0	0	1	1	0	0	0	1	0	0	0	1	1	1	1
PS41_06_1_bin.14	1	1	1	1	2	2	1	1	1	1	1	0	0	0	0	1	0	0	1	0	0	1	3	1	1	0	0	0	0	1	1	1	1	0	1	1	1	1	0	0	0	0	0	0	0	1	2	1	0
PS41_06_1_bin.15	2	0	1	1	1	1	0	0	0	2	1	0	0	0	0	0	1	0	1	0	0	1	8	2	2	0	0	4	0	0	0	0	0	0	0	0	1	1	0	0	0	0	0	0	0	0	1	1	0
PS41_06_1_bin.17	1	1	1	0	0	0	0	1	0	1	1	1	0	0	0	1	1	1	0	0	0	1	0	1	1	0	0	0	0	1	0	0	0	0	0	0	1	1	0	0	0	1	0	0	0	1	1	0	1
PS41_06_1_bin.18	1	1	1	1	0	0	1	0	0	1	1	0	0	0	0	1	0	0	0	0	0	1	8	0	0	0	0	3	0	1	1	1	1	0	1	0	1	1	0	0	0	1	0	0	0	0	0	0	0
PS41_06_1_bin.20	1	1	1	1	2	2	0	0	0	1	1	1	0	0	0	1	1	1	1	0	1	0	7	1	1	0	0	0	1	1	0	0	0	0	1	1	1	0	0	0	0	1	0	0	0	0	0	0	0
PS41_06_1_bin.21	1	1	1	2	1	1	1	1	1	1	1	0	0	0	0	2	0	0	1	1	0	1	1	0	0	0	0	0	3	1	1	0	1	0	0	0	1	1	0	0	0	0	0	0	0	1	0	1	1
PS41_06_1_bin.22	1	1	1	1	1	4	0	0	0	1	1	0	0	0	0	1	1	0	1	1	0	0	2	0	0	0	0	0	0	0	1	1	0	0	0	0	0	1	0	0	0	1	0	0	0	0	0	0	1
PS41_06_1_bin.25	0	0	0	0	0	0	0	0	0	0	1	0	0	1	0	1	0	0	0	0	1	1	5	3	3	0	0	0	0	1	0	0	0	1	0	0	0	1	0	1	1	0	0	0	0	1	0	0	1
PS41_06_1_bin.26	1	0	1	1	2	1	1	1	1	1	0	0	0	0	0	1	0	0	0	0	0	0	5	0	0	0	0	0	0	1	0	1	0	0	1	0	0	1	0	0	0	1	0	0	0	1	1	0	0
PS41_06_1_bin.28	1	1	0	0	0	0	1	1	0	1	1	1	0	0	0	1	0	1	0	0	0	1	9	0	0	0	0	1	0	0	0	0	1	0	0	0	0	1	0	0	0	1	1	0	0	1	2	0	2
PS41_06_1_bin.3	1	0	2	1	2	0	0	0	0	1	1	0	0	0	0	0	0	0	1	0	0	1	0	0	0	0	0	0	0	0	1	0	0	0	1	0	1	1	0	0	0	0	0	0	1	0	1	0	0
PS41_06_1_bin.31	1	1	1	1	2	2	0	0	0	1	1	1	0	0	0	2	1	1	0	0	0	0	0	0	0	0	0	0	0	0	1	1	1	1	1	0	0	1	0	0	0	0	0	0	0	0	1	0	0
PS41_06_1_bin.32	0	0	0	0	0	1	0	0	0	0	1	0	0	0	0	0	0	0	1	1	0	0	3	0	0	0	0	1	0	1	1	0	1	1	1	0	1	1	1	0	0	0	0	0	0	0	0	0	1
PS41_06_1_bin.33	0	0	0	0	0	1	0	0	0	0	0	1	0	0	0	0	0	1	0	0	1	1	0	0	0	0	0	0	0	1	0	0	0	0	0	0	0	1	0	0	0	0	0	0	0	0	1	1	0
PS41_06_1_bin.36	0	0	0	0	0	0	0	0	0	0	1	1	0	1	0	0	1	1	1	1	0	1	9	0	0	0	0	0	0	0	0	0	0	0	0	0	1	1	0	0	0	0	0	0	0	0	0	0	1
PS41_06_1_bin.37	0	0	0	0	0	1	0	0	0	0	0	1	0	0	0	0	0	1	1	1	0	1	0	0	0	0	0	0	0	1	1	0	1	0	0	0	0	1	0	0	0	1	0	0	0	0	1	0	0
PS41_06_1_bin.39	1	1	1	1	1	3	0	0	0	1	0	0	0	0	0	3	0	0	0	0	0	1	6	1	1	0	0	0	0	1	1	0	1	1	0	1	0	1	0	0	0	0	0	0	0	0	0	0	1
PS41_06_1_bin.4	1	1	1	1	1	1	0	0	0	1	0	0	0	0	0	0	0	0	0	1	0	0	1	0	0	0	0	0	0	0	0	0	0	0	0	1	0	1	0	0	0	1	0	0	0	0	1	0	0
PS41_06_1_bin.41	0	0	0	0	0	3	0	0	0	0	1	0	0	0	0	0	1	0	1	1	1	1	0	0	0	0	0	0	0	1	0	0	1	0	1	0	0	1	0	0	0	2	0	0	0	1	1	1	0
PS41_06_1_bin.42	1	1	1	1	1	1	1	1	0	1	1	1	0	1	0	1	1	1	1	1	1	0	0	0	0	0	0	0	0	1	0	0	1	1	1	0	1	1	0	0	0	0	0	0	0	0	2	0	0
PS41_06_1_bin.44	1	1	1	1	2	2	0	0	0	1	0	1	0	0	0	2	1	1	0	1	0	1	5	0	0	0	0	0	1	0	1	0	0	0	0	0	0	1	0	0	0	0	0	0	0	0	0	0	0
PS41_06_1_bin.45	1	1	1	1	1	1	0	0	0	1	1	1	0	0	0	1	1	1	0	0	0	1	1	0	0	0	0	0	0	0	1	0	0	0	0	0	0	1	0	0	0	1	0	0	0	0	0	0	1
PS41_06_1_bin.48	0	1	0	0	1	1	1	1	1	0	1	2	0	0	0	2	0	2	1	1	0	1	9	0	0	0	0	0	1	1	1	0	1	0	0	0	1	1	0	0	0	1	0	0	0	0	1	0	1
PS41_06_1_bin.49	0	0	0	0	0	0	0	0	0	0	0	1	0	1	0	1	0	1	0	0	0	1	0	0	0	1	0	0	0	1	0	0	1	0	0	0	0	1	0	0	0	1	0	0	0	0	0	0	1
PS41_06_1_bin.50	2	1	1	1	2	2	0	0	0	2	1	1	0	0	0	1	1	1	1	0	1	1	0	0	0	0	0	0	0	0	1	0	1	0	1	0	1	1	0	1	0	1	0	0	0	0	0	0	0
PS41_06_1_bin.51	1	1	2	1	3	2	0	1	0	1	0	1	0	0	0	1	0	1	1	1	0	0	2	0	0	0	0	0	0	1	0	0	1	0	0	0	0	1	0	0	0	0	0	0	0	0	0	0	0
PS41_06_1_bin.52	0	0	0	0	0	1	0	0	0	0	1	0	0	0	0	1	0	0	1	1	0	1	5	5	5	0	0	4	0	1	0	0	1	0	0	0	1	1	0	0	0	0	1	1	0	1	1	1	1
PS41_06_1_bin.53	1	1	1	1	0	1	1	2	0	1	1	0	0	0	0	0	0	0	1	1	1	1	2	0	0	0	0	0	0	1	1	1	1	0	1	1	1	1	0	0	0	1	0	1	0	1	1	0	0
PS41_06_1_bin.54	2	2	1	0	0	1	0	0	0	2	0	1	2	0	0	1	1	1	1	1	1	0	1	0	0	0	0	2	1	1	1	0	1	0	1	0	0	1	0	0	0	0	0	0	0	1	0	0	0
PS41_06_1_bin.55	1	0	0	0	0	2	0	0	0	1	1	1	0	0	0	1	2	1	1	1	1	1	6	0	0	0	0	0	0	1	0	0	1	0	0	0	1	1	1	0	0	2	0	0	0	0	1	0	0
PS41_06_1_bin.57	0	0	0	0	0	1	0	0	0	0	1	1	0	0	0	1	1	1	1	1	0	1	0	0	0	0	0	0	0	1	0	0	0	0	0	1	0	1	0	0	0	1	0	0	0	0	0	0	0
PS41_06_1_bin.58	0	1	1	1	2	2	1	1	2	0	1	1	0	0	0	3	0	1	0	0	1	1	0	0	0	0	0	0	1	1	0	0	1	0	1	0	0	1	0	1	0	1	0	0	0	1	0	0	0
PS41_06_1_bin.62	0	0	0	0	1	1	0	0	0	0	0	0	0	0	0	1	0	0	1	1	0	0	1	0	0	12	0	0	0	0	1	0	1	0	0	0	0	1	0	0	0	0	0	0	0	0	1	1	1
PS41_06_1_bin.64	3	1	0	0	2	2	0	0	0	3	1	0	0	0	0	0	1	0	1	0	0	1	0	0	0	0	0	0	1	0	0	0	1	1	1	0	1	1	0	0	0	0	0	0	0	1	1	0	1
PS41_06_1_bin.67	1	0	0	0	3	2	0	0	0	1	1	0	1	0	0	1	0	0	0	0	0	0	1	2	2	8	0	0	0	0	1	0	0	0	0	0	0	1	0	1	0	0	0	0	0	1	0	0	1
PS41_06_1_bin.69	0	0	1	1	1	3	0	0	0	0	1	0	0	0	0	2	0	0	0	0	0	1	7	0	0	0	0	0	2	0	1	0	0	0	1	0	0	1	0	1	0	0	0	0	0	0	0	0	0
PS41_06_1_bin.70	2	1	1	1	0	2	0	0	2	2	1	1	0	0	0	0	0	1	1	0	1	0	1	1	1	1	0	0	0	1	0	0	0	0	1	0	0	1	0	0	0	0	0	0	0	1	1	0	1
PS41_06_1_bin.71	1	2	2	2	3	3	0	0	0	1	1	1	0	0	0	2	1	1	0	0	0	0	5	11	11	0	0	3	0	0	0	0	1	0	1	0	1	1	0	0	0	1	0	0	0	1	0	0	0
PS41_06_1_bin.72	0	0	0	0	0	1	0	0	0	0	1	1	0	0	0	0	1	1	1	0	0	1	0	0	0	0	0	0	0	1	0	1	1	0	1	0	1	1	0	1	0	0	0	0	0	0	0	0	1
PS41_06_1_bin.73	1	1	1	1	2	2	0	1	1	1	1	1	0	0	0	1	0	1	1	0	1	1	2	0	0	0	0	0	0	0	0	0	0	0	1	0	1	1	0	0	0	0	1	1	0	0	0	0	1
PS41_06_1_bin.9	1	1	1	1	1	2	1	1	1	1	0	0	0	0	0	2	0	0	0	1	0	1	0	0	0	0	0	0	3	0	0	0	1	0	0	0	0	1	0	0	0	0	0	0	0	0	0	0	0
PS41_06_2_bin.12	1	1	1	1	1	1	0	0	0	1	1	0	0	0	0	1	1	0	1	1	0	1	2	0	0	0	0	0	0	1	0	1	1	0	0	0	1	1	0	0	0	1	0	0	0	0	1	1	1
PS41_06_2_bin.14	1	1	1	1	2	2	0	0	0	1	1	1	0	0	0	2	0	1	1	1	0	0	2	11	11	0	0	0	0	1	0	0	1	1	0	0	0	1	0	0	0	1	0	0	0	0	0	0	0
PS41_06_2_bin.2	2	0	1	1	3	2	0	0	0	2	1	0	0	0	0	1	0	0	1	1	1	0	6	8	8	0	0	3	0	0	0	0	1	0	1	0	1	1	0	1	0	1	0	0	0	1	0	0	1
PS41_06_2_bin.20	1	1	1	1	1	1	0	0	0	1	1	1	0	0	0	2	1	1	1	1	1	1	2	0	0	0	0	0	0	1	0	0	1	0	1	0	1	1	1	0	0	0	1	1	0	0	0	0	1
PS41_06_2_bin.23	1	0	1	1	1	1	0	0	0	1	1	1	2	1	0	1	1	1	1	0	1	0	1	0	0	2	0	1	0	0	0	0	0	0	0	0	1	1	0	0	0	0	1	1	0	0	1	0	1
PS41_06_2_bin.24	1	0	1	1	3	3	0	1	1	1	1	0	0	0	0	0	0	0	0	0	1	1	5	0	0	0	0	0	0	0	1	0	1	1	0	1	0	1	0	0	0	0	0	0	0	0	0	0	0
PS41_06_2_bin.27	1	1	1	1	2	2	0	0	1	1	1	0	0	0	0	0	0	0	1	1	0	1	0	0	0	0	0	0	0	0	0	1	0	0	1	1	0	1	0	0	0	1	0	0	0	0	0	0	0
PS41_06_2_bin.31	0	0	0	0	0	0	0	0	0	0	1	0	0	0	0	0	0	0	0	0	0	1	0	0	0	0	0	0	0	1	0	0	0	1	1	0	0	1	0	0	0	1	1	0	0	1	1	1	1
PS41_06_2_bin.32	0	0	0	0	0	1	0	0	0	0	1	0	0	0	0	1	0	0	1	0	0	0	1	3	3	0	0	4	0	0	0	0	1	0	1	0	1	1	0	0	0	1	1	0	0	1	1	0	0
PS41_06_2_bin.34	0	1	1	1	2	2	1	1	1	0	0	1	0	0	0	3	0	1	0	0	0	0	0	0	0	0	0	0	1	0	1	1	1	1	0	0	0	0	0	0	0	0	0	0	0	0	0	0	0
PS41_06_2_bin.36	2	1	1	1	3	2	0	1	1	2	0	0	0	0	0	1	0	0	0	0	0	0	0	0	0	0	0	0	0	0	0	0	0	0	0	0	0	1	0	0	0	0	0	0	0	1	0	0	0
PS41_06_2_bin.37	0	0	0	0	0	1	0	0	0	0	1	0	0	0	0	1	0	0	1	1	0	1	0	0	0	0	0	0	0	1	1	0	1	0	0	1	1	1	0	0	0	0	0	0	0	1	1	0	0
PS41_06_2_bin.38	1	1	0	0	2	1	0	1	1	1	1	1	0	0	0	1	1	1	1	0	0	0	0	0	0	0	0	0	0	1	0	1	1	1	1	1	1	1	0	2	0	0	0	0	0	0	1	0	1
PS41_06_2_bin.39	1	0	1	0	1	1	0	0	0	1	0	1	1	0	0	1	1	1	0	0	0	1	0	0	0	0	0	1	1	0	0	0	0	1	1	0	0	1	0	0	0	1	0	0	0	0	1	0	0
PS41_06_2_bin.4	1	1	0	2	2	3	0	0	0	1	1	0	0	0	0	4	0	0	1	1	0	0	5	1	1	0	0	0	0	0	1	0	1	0	0	1	1	1	0	0	0	0	0	0	0	1	1	0	1
PS41_06_2_bin.41	0	0	0	0	0	0	0	0	0	0	1	0	0	0	0	1	0	0	1	1	0	1	3	0	0	0	0	0	1	1	0	1	0	1	1	1	0	1	0	0	0	0	0	0	0	0	0	0	0
PS41_06_2_bin.42	1	1	1	1	3	0	0	0	0	1	1	0	0	0	0	1	0	0	0	0	1	1	1	0	0	0	0	0	0	1	1	0	0	0	1	0	0	1	0	0	0	1	0	0	0	1	1	0	0
PS41_06_2_bin.44	1	0	0	0	1	0	1	1	1	1	0	1	0	0	0	1	0	1	0	0	1	0	0	0	0	0	0	0	1	0	0	1	0	1	1	0	1	1	0	1	1	0	0	0	0	1	0	0	0
PS41_06_2_bin.45	1	0	1	1	2	1	0	0	0	1	0	0	0	0	0	2	0	0	1	1	0	0	1	0	0	1	0	0	0	1	1	1	0	0	0	0	0	1	0	0	0	0	0	0	0	0	0	0	0
PS41_06_2_bin.46	0	0	0	0	0	1	0	0	0	0	1	2	0	0	0	0	1	2	1	1	0	0	0	0	0	0	0	0	0	1	0	0	1	0	0	0	1	1	0	0	1	0	1	0	0	1	2	1	0
PS41_06_2_bin.47	1	1	1	1	1	4	0	0	0	1	1	1	0	0	0	1	2	1	1	1	1	1	6	0	0	0	0	0	0	1	0	0	1	0	0	1	1	1	0	0	0	1	0	0	0	1	1	0	0
PS41_06_2_bin.48	1	1	1	1	2	2	1	1	1	1	0	1	0	0	0	1	1	1	0	1	0	0	7	1	1	0	0	0	0	0	0	0	0	0	0	0	0	1	0	0	0	0	0	0	0	0	0	0	0
PS41_06_2_bin.5	1	1	1	1	3	1	0	0	0	1	1	1	0	0	0	2	1	1	0	0	1	1	4	0	0	0	0	1	0	0	0	1	1	0	1	0	0	1	0	1	0	0	0	0	0	0	0	0	1
PS41_06_2_bin.50	1	1	1	1	1	2	0	0	0	1	1	0	0	0	0	1	0	0	1	1	0	1	0	0	0	0	0	0	0	1	0	0	0	0	1	0	1	1	0	0	0	1	0	0	0	1	1	1	1
PS41_06_2_bin.51	1	0	0	1	1	1	1	1	0	1	1	0	0	0	0	1	0	0	0	0	1	1	3	0	0	0	0	0	0	1	1	0	0	0	1	0	0	1	0	0	0	0	0	0	0	0	0	0	1
PS41_06_2_bin.53	2	0	0	1	0	1	0	0	0	2	1	0	0	0	0	0	0	0	0	0	0	0	0	0	0	0	0	1	1	1	1	0	0	1	1	0	1	1	0	0	0	0	2	0	0	0	0	0	0
PS41_06_2_bin.54	1	1	1	1	2	2	0	0	0	1	1	1	0	0	0	1	1	1	0	0	1	1	1	0	0	0	0	0	0	1	1	0	0	1	1	0	1	1	0	0	0	0	0	0	0	0	1	0	0
PS41_06_2_bin.56	2	0	2	1	0	0	0	1	1	2	1	0	0	0	0	1	1	0	1	0	0	0	7	0	0	0	0	0	1	0	0	0	0	0	0	0	0	1	0	0	0	0	0	0	0	0	0	0	0
PS41_06_2_bin.58	1	1	1	1	3	3	0	0	0	1	1	0	0	0	0	2	1	0	1	1	1	0	8	0	0	0	0	0	0	0	1	0	0	0	0	0	1	1	0	0	0	1	0	0	0	0	0	0	0
PS41_06_2_bin.6	0	1	1	1	1	6	0	0	0	0	1	1	0	0	0	0	2	1	0	0	0	1	0	0	0	0	0	0	0	1	1	1	0	1	1	0	1	1	0	1	0	1	0	0	0	0	0	0	0
PS41_06_2_bin.61	1	0	1	1	1	2	0	0	0	1	1	0	0	0	0	0	0	0	1	0	1	1	6	0	0	0	0	0	2	0	0	0	1	0	0	0	1	1	0	0	0	1	0	1	0	0	0	0	1
PS41_06_2_bin.63	1	1	1	0	2	1	0	0	0	1	1	1	0	0	0	0	0	1	0	0	0	0	1	0	0	0	0	0	0	0	0	0	0	0	0	0	0	1	0	0	0	0	0	0	0	0	0	0	1
PS41_06_2_bin.65	0	1	1	1	2	2	1	0	0	0	1	1	0	0	0	1	1	1	0	0	0	0	0	0	0	0	0	0	0	0	1	0	1	1	0	0	0	1	0	0	0	0	0	0	0	0	1	0	0
PS41_06_2_bin.67	2	1	1	1	2	2	2	0	1	2	1	1	1	1	0	1	1	1	0	0	1	1	2	1	1	0	1	0	0	1	0	0	1	0	1	0	0	1	0	1	0	0	0	0	0	1	0	0	1
PS41_06_2_bin.68	1	1	1	1	1	1	0	0	1	1	1	1	0	0	0	1	0	1	1	0	0	0	1	0	0	0	0	0	1	1	0	0	1	0	0	0	1	1	0	0	0	1	0	0	0	0	0	0	0
PS41_06_2_bin.69	1	1	1	1	1	1	0	0	0	1	1	0	0	0	0	1	0	0	1	1	1	0	2	0	0	0	0	0	0	0	1	1	0	0	1	0	1	1	0	1	0	0	0	0	0	0	0	0	0
PS41_06_2_bin.70	1	1	0	1	2	1	1	1	1	1	1	1	0	0	0	1	1	1	1	0	0	1	1	0	0	0	0	1	1	0	0	0	0	0	1	1	1	0	0	0	0	0	0	0	0	0	0	0	0
PS41_06_2_bin.8	2	1	1	2	2	1	0	0	0	2	1	2	0	0	0	1	1	2	1	1	0	0	0	0	0	0	0	0	1	1	1	0	1	1	0	0	1	1	0	0	0	1	0	0	0	0	0	0	0
PS41_18_1_bin.13	0	0	0	0	0	0	0	0	1	0	1	1	0	0	0	1	1	1	0	0	1	1	0	0	0	0	0	0	0	1	0	0	1	0	0	0	0	1	0	0	0	1	1	0	1	0	0	0	1
PS41_18_1_bin.15	0	0	0	0	0	0	0	0	0	0	0	0	1	0	0	0	0	0	0	0	0	1	1	0	0	0	0	0	0	1	0	0	1	0	0	0	0	1	0	0	0	1	0	0	0	0	1	0	1
PS41_18_1_bin.16	2	0	1	2	2	0	0	0	0	2	1	1	1	0	0	1	0	1	1	1	0	0	1	0	0	0	0	0	0	0	1	0	1	0	0	0	0	1	0	0	0	0	0	0	0	0	0	0	1
PS41_18_1_bin.17	1	1	0	1	1	1	0	0	0	1	1	1	0	0	0	2	0	1	1	1	0	0	4	1	1	0	0	0	0	1	1	1	0	1	1	0	1	1	0	0	0	1	0	0	0	0	0	0	1
PS41_18_1_bin.18	1	1	1	1	1	4	0	0	0	1	0	1	0	0	0	1	2	1	0	0	0	1	2	0	0	0	0	0	0	0	0	0	1	0	1	0	0	1	0	0	0	0	0	0	0	1	0	0	0
PS41_18_1_bin.20	1	0	1	1	1	1	3	3	0	1	1	1	0	0	0	1	1	1	1	0	0	1	2	0	0	0	0	0	0	0	0	0	0	0	1	0	0	1	0	0	0	0	0	0	0	0	0	0	0
PS41_18_1_bin.21	1	1	2	1	1	0	1	1	1	1	1	1	0	0	0	0	1	1	0	0	1	0	1	0	0	0	0	0	0	0	0	0	1	1	1	0	0	1	0	0	0	0	0	0	0	0	1	0	0
PS41_18_1_bin.22	1	0	1	0	2	2	0	0	0	1	1	2	0	0	0	1	0	2	0	1	1	1	0	0	0	0	0	0	1	1	1	0	1	0	0	1	0	1	0	1	1	0	0	0	0	1	0	0	0
PS41_18_1_bin.23	1	1	1	0	1	1	0	0	0	1	1	0	0	0	0	2	0	0	1	0	1	1	6	0	0	0	0	0	0	0	1	0	1	0	0	0	1	1	1	0	0	1	0	0	0	1	1	0	1
PS41_18_1_bin.24	0	0	0	0	0	0	0	0	0	0	1	1	0	0	0	1	0	1	1	1	0	1	0	0	0	0	0	0	0	1	0	0	1	1	1	1	0	1	0	0	0	1	0	0	0	0	0	0	0
PS41_18_1_bin.27	1	1	1	1	1	1	0	0	0	1	1	0	0	0	0	0	1	0	1	1	0	0	0	0	0	2	0	2	0	1	1	0	1	1	1	0	0	1	0	0	0	0	0	0	0	0	0	0	1
PS41_18_1_bin.28	1	1	1	1	2	4	0	0	0	1	1	1	0	0	0	3	1	1	1	0	0	1	6	2	2	0	0	0	0	0	1	0	1	1	0	1	1	1	0	0	0	1	0	0	0	0	3	1	0
PS41_18_1_bin.29	0	0	0	0	0	0	0	0	0	0	0	1	2	1	0	1	0	1	1	1	0	1	2	1	1	0	0	0	0	0	1	1	1	1	1	0	1	1	0	0	0	0	0	0	0	0	1	0	0
PS41_18_1_bin.3	1	1	0	1	1	3	0	0	0	1	1	0	0	1	0	1	0	0	0	0	0	1	3	1	1	0	0	0	0	0	0	0	1	0	0	0	0	1	0	0	0	1	0	0	0	0	0	0	0
PS41_18_1_bin.33	1	2	1	1	2	2	1	0	1	1	1	1	0	0	0	1	1	1	1	0	0	0	0	0	0	0	0	0	0	0	0	0	0	0	0	0	1	1	0	0	0	0	0	0	0	0	0	0	0
PS41_18_1_bin.35	2	1	1	2	3	3	0	0	0	2	1	1	0	0	0	1	1	1	1	1	1	0	7	0	0	1	0	0	1	0	0	0	0	0	0	0	1	1	1	0	0	1	0	1	0	1	1	1	1
PS41_18_1_bin.36	0	0	0	0	0	1	0	0	0	0	0	2	1	0	0	0	0	2	1	1	1	0	0	0	0	0	0	0	0	0	1	0	1	0	0	0	0	1	0	0	0	0	0	0	0	1	0	0	0
PS41_18_1_bin.37	1	1	1	1	2	2	1	2	1	1	1	1	1	1	0	1	1	1	0	0	1	0	0	0	0	0	0	0	0	0	1	0	1	0	1	1	0	1	0	0	0	0	1	0	0	0	0	0	0
PS41_18_1_bin.38	1	1	1	1	1	1	0	0	0	1	1	1	0	0	0	1	1	1	1	0	0	0	0	0	0	0	0	1	1	1	1	1	1	1	1	0	1	1	0	0	0	0	0	1	0	0	2	0	0
PS41_18_1_bin.39	0	0	0	0	0	0	0	0	0	0	1	0	0	0	0	0	0	0	1	0	1	1	0	0	0	0	0	0	0	1	1	1	1	0	1	0	1	1	0	0	0	0	0	0	0	0	0	0	0
PS41_18_1_bin.40	1	1	1	0	3	2	0	0	0	1	0	0	0	0	0	1	0	0	1	1	0	0	2	0	0	0	0	0	0	1	0	0	1	1	0	0	0	0	0	0	0	0	0	0	0	0	0	0	0
PS41_18_1_bin.41	2	1	1	1	2	2	1	1	1	2	1	1	0	0	0	0	1	1	1	1	0	0	2	0	0	0	0	2	0	0	0	0	1	1	1	1	1	1	0	3	0	0	0	1	0	0	1	0	0
PS41_18_1_bin.43	0	0	0	0	0	1	0	0	0	0	1	1	1	0	0	0	1	1	0	0	0	1	0	0	0	0	0	0	0	1	0	1	0	1	1	0	0	1	0	0	0	0	0	0	0	0	0	0	1
PS41_18_1_bin.44	0	0	0	0	0	0	0	0	0	0	0	0	0	0	0	0	0	0	0	0	0	0	0	0	0	0	0	0	0	1	0	0	0	1	1	0	0	1	0	1	0	0	0	0	0	0	0	0	0
PS41_18_1_bin.46	1	1	1	1	1	1	0	0	0	1	1	1	0	0	0	1	1	1	1	1	1	1	3	0	0	0	0	1	1	0	0	0	1	0	0	0	1	1	0	0	0	0	0	0	1	1	1	0	1
PS41_18_1_bin.47	1	1	0	1	1	3	0	0	0	1	1	1	0	0	0	1	1	1	1	0	0	0	9	1	1	0	0	0	0	1	1	0	1	0	1	0	0	1	0	0	0	0	0	0	0	1	0	0	0
PS41_18_1_bin.48	2	1	1	2	0	0	0	0	0	2	1	0	0	0	0	0	0	0	0	1	1	0	0	0	0	0	0	0	0	1	1	1	1	1	1	1	1	1	0	0	0	0	0	0	0	0	0	0	1
PS41_18_1_bin.49	0	1	1	0	1	1	0	0	0	0	0	0	0	0	0	1	1	0	1	1	0	1	0	0	0	0	0	0	0	0	0	0	0	0	0	0	0	1	0	0	0	0	0	0	0	0	0	0	0
PS41_18_1_bin.5	0	0	0	0	0	0	0	0	0	0	0	0	0	0	0	0	1	0	0	0	0	0	10	2	2	0	0	0	0	1	1	0	0	0	1	1	0	0	0	0	0	0	0	0	0	0	0	0	0
PS41_18_1_bin.50	2	1	1	1	1	2	2	2	1	2	1	0	0	0	0	0	1	0	0	0	1	1	2	1	1	0	1	0	0	0	1	1	1	1	1	0	0	1	0	0	0	0	0	0	0	0	0	0	1
PS41_18_1_bin.52	1	0	1	1	1	3	0	0	0	1	1	0	0	0	0	2	0	0	0	0	1	1	7	1	1	0	0	0	0	0	0	0	0	0	1	0	0	1	0	0	0	0	1	0	0	0	1	1	0
PS41_18_1_bin.53	0	1	1	0	0	0	0	0	0	0	0	1	0	0	0	3	0	1	0	0	0	0	0	0	0	0	0	0	0	1	1	0	1	0	0	0	0	1	0	0	0	0	0	0	0	0	0	0	0
PS41_18_1_bin.56	0	0	1	1	0	0	0	0	0	0	1	0	0	0	0	0	0	0	1	1	0	1	1	0	0	0	0	0	0	0	0	0	0	0	1	0	1	1	0	0	0	1	0	0	0	0	1	1	0
PS41_18_1_bin.57	1	1	0	1	0	1	1	1	0	1	0	2	0	0	0	1	0	2	0	0	0	1	1	0	0	0	0	2	0	1	0	0	1	1	0	0	0	1	0	0	0	1	0	1	0	0	0	0	1
PS41_18_1_bin.59	1	0	0	2	0	2	0	0	0	1	1	0	0	0	0	0	0	0	1	1	1	0	6	0	0	0	0	0	0	1	0	0	1	0	0	0	0	1	0	0	0	0	0	0	0	0	0	0	0
PS41_18_1_bin.6	3	0	1	1	0	1	0	0	0	3	1	0	0	0	0	1	1	0	0	0	1	0	1	1	1	0	0	1	1	0	1	0	1	0	0	0	1	1	0	0	0	2	0	0	1	0	1	1	0
PS41_18_1_bin.60	1	0	1	1	0	1	0	1	1	1	1	1	0	0	0	1	0	1	1	1	0	0	6	0	0	0	0	0	1	0	1	0	1	1	0	0	1	1	0	0	0	0	0	0	0	0	0	0	0
PS41_18_1_bin.61	1	0	0	1	1	1	0	0	0	1	0	0	0	0	0	1	0	0	1	0	0	0	0	0	0	0	0	0	1	0	0	0	0	0	1	0	1	0	0	1	0	0	1	0	0	1	0	0	0
PS41_18_1_bin.62	1	1	1	1	1	1	0	1	1	1	0	0	0	0	0	2	0	0	0	0	0	0	1	0	0	0	0	0	3	1	0	0	0	0	1	0	0	1	0	0	0	1	0	0	0	0	0	0	0
PS41_18_1_bin.63	1	1	0	0	0	1	1	0	1	1	1	1	0	0	0	1	1	1	0	0	1	0	1	0	0	3	0	0	0	1	1	0	1	0	1	0	0	1	0	0	0	0	0	0	1	0	0	0	0
PS41_18_1_bin.64	1	1	1	1	3	2	1	2	2	1	1	1	0	0	0	3	1	1	1	0	0	1	6	0	0	0	1	0	1	1	0	0	1	1	0	0	0	1	0	0	0	0	0	0	0	0	0	0	0
PS41_18_1_bin.65	1	1	1	1	1	0	0	0	0	1	1	0	0	0	0	0	1	0	1	0	1	0	0	0	0	0	0	0	0	0	0	0	1	0	1	0	1	0	0	0	0	0	1	0	0	0	1	0	0
PS41_18_1_bin.66	0	0	0	0	0	0	0	0	0	0	1	2	0	0	0	0	0	2	1	0	0	1	4	0	0	0	0	0	0	0	0	0	0	1	1	0	1	0	0	0	0	1	0	0	0	0	0	0	0
PS41_18_1_bin.7	0	0	0	0	0	0	0	0	0	0	1	1	0	0	0	0	1	1	1	1	0	0	2	0	0	0	0	0	0	0	1	0	1	1	0	0	0	1	0	0	0	1	0	0	0	0	0	0	0
PS41_18_1_bin.9	1	2	0	0	0	0	2	2	0	1	1	1	0	0	0	1	1	1	1	0	1	1	9	0	0	0	0	1	1	0	1	0	1	0	1	1	1	1	0	0	0	0	0	0	0	0	0	0	0
PS41_18_2_bin.10	1	2	0	1	0	0	0	0	0	1	1	0	1	1	1	0	0	0	1	1	0	1	2	0	0	0	0	0	0	1	0	0	1	0	0	1	1	1	0	0	0	1	0	0	0	1	1	1	1
PS41_18_2_bin.12	1	1	1	2	1	2	1	1	1	1	1	0	0	0	0	2	0	0	0	0	0	1	1	0	0	0	0	0	2	1	1	0	1	0	0	0	0	1	0	0	0	1	0	0	0	0	0	0	0
PS41_18_2_bin.13	0	1	2	1	3	1	0	0	0	0	0	0	0	0	0	1	0	0	1	1	1	1	1	0	0	1	0	0	0	0	1	1	0	0	0	0	0	1	0	0	0	0	0	0	0	0	0	0	0
PS41_18_2_bin.14	0	0	0	0	0	0	0	0	0	0	0	0	1	1	0	0	0	0	0	0	0	1	5	0	0	0	0	0	0	0	0	0	0	0	0	0	0	1	0	0	0	0	0	0	1	1	0	0	0
PS41_18_2_bin.16	1	1	1	1	1	1	0	0	0	1	1	0	0	0	0	1	1	0	1	1	1	1	0	0	0	0	0	0	0	1	0	1	1	0	1	0	1	1	0	0	0	0	0	0	1	1	1	0	0
PS41_18_2_bin.17	0	0	0	0	0	0	0	0	0	0	1	0	0	0	0	0	0	0	0	0	0	0	2	0	0	0	0	0	0	0	1	0	1	0	0	0	0	1	0	0	0	0	0	0	0	0	0	0	0
PS41_18_2_bin.20	0	0	0	0	1	1	0	0	0	0	1	0	0	0	0	1	1	0	1	1	0	0	1	0	0	0	0	0	0	0	0	0	0	1	1	0	0	1	0	0	0	1	0	0	0	0	0	0	0
PS41_18_2_bin.22	1	1	1	1	1	1	0	0	0	1	1	0	0	0	0	0	0	0	1	0	0	0	2	0	0	0	0	0	0	0	0	0	0	0	0	0	0	1	0	0	0	0	0	0	0	1	0	0	0
PS41_18_2_bin.23	0	0	0	0	0	1	0	0	0	0	0	1	0	0	0	0	0	1	0	0	1	1	4	0	0	0	0	0	0	0	0	0	0	0	1	0	0	1	0	0	0	1	0	0	0	0	0	0	0
PS41_18_2_bin.26	1	1	1	1	1	1	1	0	0	1	1	0	0	0	0	2	1	0	1	1	0	1	2	0	0	0	0	0	0	0	1	0	1	0	1	0	1	1	0	0	0	1	0	0	0	0	0	0	1
PS41_18_2_bin.27	0	0	0	0	0	0	0	0	0	0	0	0	0	0	0	0	0	0	1	1	0	1	0	0	0	0	0	0	0	1	1	0	1	0	1	1	0	1	0	0	0	0	0	0	1	0	0	0	0
PS41_18_2_bin.28	1	0	1	1	0	0	0	0	0	1	0	0	0	0	0	0	1	0	0	0	0	0	3	0	0	0	0	0	0	0	1	0	1	0	1	0	0	1	0	0	0	1	0	0	0	0	0	0	0
PS41_18_2_bin.37	0	1	1	1	1	2	0	1	1	0	1	1	0	0	0	1	1	1	0	0	1	1	0	0	0	0	0	0	0	1	1	0	1	1	0	0	0	1	0	0	0	1	1	0	1	0	0	0	1
PS41_18_2_bin.40	2	1	1	1	2	0	1	1	0	2	0	1	0	0	0	1	1	1	1	1	0	0	1	0	0	0	0	1	0	1	0	0	1	1	0	0	0	1	0	0	0	0	0	0	2	0	0	0	0
PS41_18_2_bin.42	0	0	0	0	0	1	0	0	0	0	1	2	0	0	0	0	0	2	1	1	1	1	0	0	0	0	0	0	0	0	1	0	0	0	1	0	1	1	0	0	0	1	0	0	0	0	0	0	0
PS41_18_2_bin.44	0	1	1	0	0	0	0	0	0	0	1	0	0	0	0	0	0	0	0	0	1	1	3	0	0	0	0	0	0	1	1	0	1	0	0	0	0	1	0	1	0	0	0	0	0	1	0	0	1
PS41_18_2_bin.46	1	1	0	0	1	1	1	1	0	1	0	1	0	0	0	1	1	1	0	0	0	0	12	0	0	0	0	1	1	1	1	0	0	0	0	0	0	0	0	0	0	0	0	0	0	0	0	0	0
PS41_18_2_bin.47	1	1	0	0	2	3	0	0	0	1	1	0	1	1	0	0	0	0	1	1	1	0	2	1	1	1	0	0	0	1	1	0	0	1	1	0	0	1	0	0	0	0	0	0	0	0	2	1	0
PS41_18_2_bin.48	1	1	0	1	1	1	0	0	0	1	0	1	0	0	0	1	0	1	0	0	0	0	2	1	1	0	0	0	0	0	0	0	0	0	1	1	0	0	0	0	0	0	0	0	0	0	0	0	0
PS41_18_2_bin.49	1	0	1	1	0	0	0	1	0	1	1	0	0	0	0	1	0	0	1	1	0	0	5	1	1	0	0	0	1	0	0	0	0	0	1	0	1	1	0	0	0	0	0	1	0	0	2	1	0
PS41_18_2_bin.6	1	1	0	1	0	1	0	0	0	1	1	0	0	0	0	0	0	0	0	0	1	0	1	0	0	0	0	3	0	0	0	0	1	1	0	0	1	1	0	0	0	0	0	0	0	0	0	0	0
PS41_18_2_bin.7	1	1	1	1	0	1	0	0	0	1	0	0	1	2	0	1	0	0	0	0	0	0	6	0	0	0	0	0	1	0	1	0	1	0	1	0	0	1	0	0	0	0	0	0	0	0	0	0	0
PS41_18_2_bin.8	0	0	0	0	0	0	0	0	0	0	1	0	1	1	0	1	0	0	0	0	0	0	6	3	3	0	0	0	0	1	0	1	0	0	1	0	0	1	0	0	0	0	0	0	0	0	0	0	0
PS41_30_1_bin.1	2	1	1	1	4	1	0	0	0	2	1	0	0	0	0	1	0	0	1	0	1	1	1	0	0	0	0	0	0	0	0	0	0	0	0	0	1	0	0	0	0	0	0	0	1	0	1	0	0
PS41_30_1_bin.10	0	0	0	0	0	1	0	0	0	0	1	1	0	0	0	0	0	1	0	0	1	0	0	1	1	0	0	0	0	1	1	0	1	1	0	0	0	1	0	0	0	0	0	0	0	0	0	0	0
PS41_30_1_bin.11	1	1	1	1	1	1	0	1	0	1	1	1	1	1	0	0	0	1	0	0	1	0	9	0	0	0	0	1	1	0	0	0	0	1	0	0	0	1	0	0	0	0	0	0	0	1	0	0	1
PS41_30_1_bin.12	0	0	0	0	0	0	0	0	0	0	1	0	0	0	0	0	0	0	1	1	0	1	0	0	0	0	0	0	0	0	0	0	1	0	0	0	1	1	0	0	0	0	2	0	0	1	1	0	0
PS41_30_1_bin.14	0	0	0	0	0	0	0	0	0	0	1	0	0	0	0	0	1	0	0	0	0	1	0	0	0	0	0	0	0	1	0	0	0	0	0	0	0	1	0	0	0	1	0	0	0	0	0	0	0
PS41_30_1_bin.16	0	0	0	0	0	0	0	0	0	0	1	0	0	0	0	0	0	0	0	0	0	1	3	0	0	0	0	1	0	0	0	0	0	0	0	0	0	1	0	0	0	0	0	0	0	0	0	0	0
PS41_30_1_bin.17	1	1	1	1	2	2	1	4	0	1	1	1	0	0	0	2	1	1	0	0	1	0	1	0	0	0	0	0	0	1	0	1	0	0	1	1	0	1	0	0	0	0	0	0	0	1	0	0	0
PS41_30_1_bin.18	0	0	0	0	0	0	0	0	0	0	1	0	0	0	0	0	0	0	0	0	0	1	0	0	0	0	0	0	0	0	1	0	0	0	1	0	0	1	0	0	0	1	0	0	0	0	1	0	0
PS41_30_1_bin.2	0	1	0	1	1	3	0	0	0	0	0	0	0	0	0	1	1	0	1	1	0	0	10	1	1	0	0	0	0	1	0	0	0	0	0	0	0	1	0	0	0	0	0	0	0	0	0	0	0
PS41_30_1_bin.20	0	0	0	0	0	1	0	0	0	0	0	1	0	0	0	1	0	1	1	1	0	0	4	1	1	2	0	2	0	0	1	0	1	1	1	0	0	1	0	0	0	0	0	0	0	1	1	0	0
PS41_30_1_bin.21	0	0	0	0	0	0	0	0	0	0	1	1	0	0	0	0	1	1	1	0	1	1	5	0	0	0	0	0	0	1	0	0	1	0	0	1	1	1	0	0	0	0	0	0	0	1	1	0	0
PS41_30_1_bin.24	1	1	1	1	2	2	2	2	3	1	0	1	0	0	0	3	1	1	0	0	0	0	7	0	0	0	1	0	1	1	1	0	0	0	1	1	0	0	0	0	0	0	0	0	0	0	0	0	0
PS41_30_1_bin.25	1	0	0	1	1	3	0	0	0	1	1	0	0	0	0	0	0	0	1	1	1	0	2	1	1	0	0	0	0	1	0	0	0	0	1	0	0	0	0	0	0	0	0	0	1	0	0	0	0
PS41_30_1_bin.26	1	1	1	1	2	2	0	0	0	1	0	0	0	0	0	3	0	0	0	0	1	0	5	2	2	0	0	0	0	1	1	0	1	1	0	0	0	1	0	0	0	0	0	0	0	0	1	1	0
PS41_30_1_bin.29	2	0	1	0	0	1	0	0	0	2	1	2	0	0	0	0	0	2	0	0	0	0	1	0	0	0	0	0	0	0	0	0	0	0	0	0	0	1	0	0	0	0	0	0	0	0	0	0	0
PS41_30_1_bin.30	1	0	0	0	0	0	2	2	0	1	0	1	0	0	0	1	1	1	0	0	0	0	2	0	0	0	0	0	0	1	1	1	1	1	1	1	0	1	0	0	0	0	0	0	0	0	0	0	0
PS41_30_1_bin.31	0	1	1	2	2	2	1	3	2	0	1	0	0	0	0	3	0	0	0	0	1	0	0	0	0	2	0	0	1	1	0	0	1	0	1	0	0	1	0	0	0	0	0	0	0	0	0	0	0
PS41_30_1_bin.33	1	0	1	0	1	1	0	1	1	1	0	0	0	0	0	1	0	0	1	0	1	0	1	0	0	0	0	0	3	1	0	0	1	0	1	0	0	1	0	0	0	0	0	1	0	0	0	0	0
PS41_30_1_bin.35	1	0	1	1	1	5	0	0	0	1	0	1	0	0	0	0	2	1	0	0	0	1	4	0	0	0	0	0	0	0	0	1	1	0	0	0	0	1	0	0	0	1	0	0	0	1	0	1	0
PS41_30_1_bin.38	2	0	1	1	3	2	0	1	0	2	1	0	0	0	0	1	0	0	1	1	1	1	4	0	0	1	0	0	0	0	0	0	0	0	0	0	1	1	0	0	0	1	0	0	0	1	1	1	1
PS41_30_1_bin.39	0	0	0	0	0	0	0	0	0	0	1	1	0	0	0	0	1	1	0	0	1	0	4	0	0	0	0	3	0	0	1	0	1	0	1	0	0	1	0	0	0	0	0	0	0	1	1	0	0
PS41_30_1_bin.4	2	1	2	1	0	0	0	0	0	2	1	1	1	0	0	1	0	1	1	1	1	0	0	1	1	2	0	0	2	0	0	0	0	0	0	0	1	1	0	0	0	2	0	0	1	1	1	1	0
PS41_30_1_bin.40	1	1	0	1	1	0	0	0	0	1	1	1	0	0	0	2	1	1	0	0	1	0	3	0	0	0	0	0	0	0	1	0	0	0	0	0	1	1	0	1	1	0	0	0	0	1	0	0	0
PS41_30_1_bin.43	0	0	0	0	0	0	0	0	0	0	1	1	3	1	0	1	1	1	0	0	0	0	3	1	1	0	0	0	0	1	0	0	1	0	1	0	1	1	1	0	0	1	0	0	0	0	0	0	0
PS41_30_1_bin.44	1	0	0	0	1	1	0	0	0	1	1	0	0	0	0	1	0	0	1	0	0	1	0	0	0	0	0	0	1	0	0	0	1	0	0	0	0	1	0	0	0	1	0	0	0	0	0	0	0
PS41_30_1_bin.46	1	1	0	1	1	1	0	0	0	1	1	0	0	0	0	1	0	0	0	0	0	0	3	1	1	0	0	0	0	0	0	1	0	0	1	1	0	1	0	0	0	1	0	0	0	0	0	0	0
PS41_30_1_bin.48	2	0	1	0	2	1	1	1	1	2	1	0	0	0	0	1	1	0	0	0	0	1	1	0	0	0	0	1	0	0	1	1	1	1	1	0	0	1	0	1	0	0	0	0	0	0	0	0	0
PS41_30_1_bin.49	1	1	1	2	2	2	0	0	0	1	1	1	1	2	1	0	1	1	1	0	0	0	2	2	2	0	0	0	0	1	1	0	0	0	0	1	1	0	0	0	0	2	0	0	0	0	1	1	1
PS41_30_1_bin.5	1	1	1	1	1	1	0	0	0	1	0	1	0	0	0	2	1	1	1	1	1	0	6	0	0	0	0	0	1	1	1	0	1	1	1	0	0	1	0	0	0	0	0	1	0	0	0	1	0
PS41_30_1_bin.53	1	1	1	1	0	0	0	0	0	1	0	1	0	0	0	0	1	1	0	0	0	0	0	0	0	0	0	0	0	1	1	0	0	1	0	0	0	1	0	0	0	0	0	0	0	0	0	0	0
PS41_30_1_bin.54	0	0	0	0	0	0	0	0	0	0	1	0	0	0	0	0	0	0	1	1	1	1	3	0	0	0	0	0	0	1	0	1	0	1	1	0	1	1	0	0	0	0	1	1	0	0	0	0	1
PS41_30_1_bin.56	0	1	0	0	2	1	0	1	1	0	0	1	0	0	0	1	0	1	0	1	1	0	2	0	0	2	0	0	0	0	0	0	1	0	0	0	0	1	0	0	0	0	0	0	0	1	0	0	1
PS41_30_1_bin.57	1	0	1	1	1	1	0	0	0	1	1	0	0	0	0	1	0	0	1	1	0	1	0	0	0	0	0	0	0	1	0	0	1	0	1	1	1	1	0	0	0	0	0	0	0	0	0	0	0
PS41_30_1_bin.59	0	0	0	0	0	1	0	0	0	0	0	1	0	0	0	0	1	1	1	1	1	0	2	0	0	0	0	1	0	1	1	0	1	1	1	0	0	1	0	0	0	0	0	0	0	0	0	0	0
PS41_30_1_bin.6	0	0	0	0	0	0	0	0	0	0	1	1	0	0	0	0	1	1	0	0	0	0	4	0	0	0	0	1	0	1	1	1	0	1	1	0	1	1	0	0	0	0	0	0	0	0	0	0	0
PS41_30_1_bin.60	0	0	0	0	0	1	0	0	0	0	1	0	0	0	0	1	1	0	1	1	1	1	5	4	4	0	0	1	0	1	1	0	0	1	1	0	0	1	0	0	0	1	0	0	0	0	1	0	0
PS41_30_1_bin.61	0	0	0	0	0	0	0	0	0	0	1	1	1	1	0	0	1	1	1	1	1	0	8	0	0	0	0	0	0	0	1	0	0	1	0	0	1	1	0	0	0	1	0	0	0	2	0	0	1
PS41_30_1_bin.62	0	0	0	0	0	0	0	0	0	0	1	0	0	0	0	0	0	0	1	1	1	1	0	0	0	0	0	0	0	0	0	0	0	0	0	0	0	1	0	0	0	0	0	0	0	1	0	1	0
PS41_30_1_bin.64	1	1	1	1	2	2	0	1	0	1	0	1	0	0	0	1	1	1	0	0	0	0	0	0	0	0	0	0	1	1	1	0	1	0	0	0	0	1	0	0	0	1	0	0	1	0	0	0	0
PS41_30_1_bin.65	1	1	0	0	1	1	0	0	0	1	1	0	0	0	0	3	0	0	1	1	1	1	6	1	1	0	0	0	0	1	1	0	1	1	0	0	1	1	0	0	0	1	0	0	0	0	0	0	1
PS41_30_1_bin.66	1	1	0	0	1	3	0	0	0	1	1	0	0	0	0	1	0	0	1	1	0	1	2	0	0	0	0	0	0	0	0	0	0	0	1	0	1	1	0	1	0	1	0	0	0	0	0	0	0
PS41_30_1_bin.67	1	1	2	1	2	2	0	0	0	1	0	0	0	0	0	3	1	0	0	1	1	1	8	2	2	0	0	0	0	0	0	0	0	0	1	0	0	1	0	0	0	0	0	0	0	0	2	1	0
PS41_30_1_bin.70	1	1	1	2	1	2	0	0	0	1	0	0	0	0	0	1	0	0	1	1	1	1	1	0	0	0	0	0	2	0	1	1	1	0	1	0	0	1	0	0	0	0	0	0	0	0	1	1	0
PS41_30_1_bin.73	0	0	0	1	1	1	0	0	0	0	0	0	0	0	0	1	0	0	0	0	1	0	1	1	1	0	0	0	0	0	0	0	1	0	0	0	0	1	0	0	0	0	0	0	1	0	1	1	0
PS41_30_1_bin.74	0	0	0	0	0	0	0	0	0	0	0	0	1	1	0	1	0	0	1	1	0	1	1	0	0	0	1	0	0	0	1	0	0	0	1	1	1	1	0	0	0	1	0	0	0	1	1	0	1
PS41_30_1_bin.75	1	1	1	1	1	1	0	0	0	1	0	0	0	0	0	1	1	0	0	0	0	0	7	0	0	0	0	0	0	0	1	0	1	0	0	0	0	1	0	1	0	0	0	0	0	0	0	0	0
PS41_30_1_bin.78	1	1	1	1	1	4	0	0	0	1	0	1	0	0	0	0	2	1	0	1	0	0	2	0	0	0	0	0	0	0	0	0	1	0	0	0	0	1	0	0	0	0	0	0	0	0	0	0	0
PS41_30_1_bin.8	1	0	1	3	2	2	0	1	0	1	1	1	0	0	0	2	1	1	0	0	1	1	6	0	0	0	0	0	0	0	1	0	0	0	0	0	0	1	0	0	0	1	0	0	0	0	1	1	0
PS41_30_1_bin.80	1	1	1	2	1	1	1	1	0	1	1	0	0	0	0	1	0	0	0	0	1	0	2	0	0	0	0	0	0	0	1	1	0	0	1	0	1	1	0	0	0	0	1	0	0	0	1	1	0
PS41_30_1_bin.81	1	1	1	1	1	1	1	2	1	1	1	1	0	0	0	4	1	1	1	1	1	0	9	0	0	0	0	1	0	0	0	0	0	0	1	0	0	1	0	0	0	0	0	0	0	1	1	0	0
PS41_30_1_bin.83	1	1	1	1	1	2	0	0	0	1	1	1	0	0	0	0	2	1	1	1	0	0	6	0	0	0	0	0	0	0	0	0	0	0	0	0	0	1	0	0	0	0	0	0	0	0	0	0	1
PS41_30_1_bin.86	0	0	0	0	0	0	0	0	0	0	1	0	0	0	0	0	0	0	0	0	1	0	0	0	0	0	0	0	0	1	0	0	1	0	0	0	0	1	0	0	0	0	0	0	0	0	0	0	0
PS41_30_1_bin.87	0	0	0	0	0	0	0	0	0	0	0	0	0	0	0	2	0	0	0	0	0	0	3	2	2	0	0	1	0	0	0	0	0	0	0	0	0	0	0	0	0	0	0	0	0	0	0	0	0
PS41_30_1_bin.88	1	1	1	1	1	1	2	2	1	1	0	1	0	0	0	1	0	1	0	0	0	0	13	0	0	0	0	0	0	0	0	0	1	0	0	0	0	1	0	0	0	0	0	1	0	0	0	0	0
PS41_30_1_bin.9	0	0	0	0	0	0	0	0	1	0	0	1	0	0	0	1	1	1	0	0	0	1	0	0	0	0	0	0	0	1	0	0	0	0	0	0	0	1	0	0	0	0	0	1	0	1	0	0	1
PS41_30_2_bin.10	1	1	1	2	2	2	0	0	0	1	1	2	0	0	0	1	1	2	0	0	0	1	0	0	0	0	0	0	1	1	1	0	0	1	0	0	0	1	0	1	1	0	0	0	0	1	0	0	1
PS41_30_2_bin.11	1	1	1	1	1	0	0	1	1	1	1	1	0	0	0	1	0	1	1	1	1	1	6	0	0	0	0	0	1	1	1	0	0	0	1	0	1	1	0	0	0	0	0	0	0	0	0	0	1
PS41_30_2_bin.12	1	1	1	1	2	3	0	0	0	1	1	0	0	0	0	3	0	0	0	0	1	1	9	2	2	0	0	0	0	1	1	0	1	1	1	0	1	1	1	0	0	0	0	0	0	1	0	0	0
PS41_30_2_bin.15	1	1	1	2	1	1	0	0	0	1	1	0	0	0	0	1	0	0	1	1	1	1	0	1	1	0	0	0	0	0	1	0	1	1	1	0	1	1	0	0	0	1	0	0	0	0	0	0	1
PS41_30_2_bin.19	0	0	0	0	0	1	0	0	0	0	1	1	0	0	0	1	1	1	0	0	1	1	5	4	4	0	0	0	0	1	0	0	0	0	0	0	0	0	0	1	0	0	0	0	0	0	0	0	0
PS41_30_2_bin.2	1	1	0	0	1	4	0	0	0	1	0	1	0	0	0	0	1	1	0	0	0	0	9	0	0	0	0	0	0	0	0	0	1	0	0	0	0	1	0	0	0	0	0	0	0	0	0	0	0
PS41_30_2_bin.21	0	0	0	0	0	0	0	0	0	0	1	0	1	0	0	0	1	0	1	0	0	0	2	0	0	0	0	0	0	0	0	0	0	0	1	0	0	1	0	0	0	0	0	0	0	0	0	0	0
PS41_30_2_bin.22	1	1	1	1	2	2	1	1	1	1	0	1	0	0	0	3	1	1	1	1	1	0	2	0	0	4	0	0	0	0	0	0	1	0	0	0	0	1	0	0	0	0	0	0	0	0	0	1	1
PS41_30_2_bin.23	2	1	0	0	1	1	0	0	0	2	1	1	0	0	0	0	0	1	1	1	1	1	2	0	0	0	0	0	0	0	0	0	1	0	0	0	1	1	0	0	0	0	1	0	0	2	1	1	1
PS41_30_2_bin.24	1	1	1	0	1	1	0	0	0	1	1	0	0	0	0	0	1	0	1	0	0	0	10	0	0	0	0	1	0	0	1	1	1	1	1	0	1	1	0	0	0	1	0	0	0	0	0	0	1
PS41_30_2_bin.25	0	0	0	0	0	0	0	0	0	0	1	1	3	1	0	0	1	1	1	1	0	0	2	1	1	0	0	0	0	0	1	0	1	1	1	1	0	1	0	1	0	0	0	0	0	0	0	0	1
PS41_30_2_bin.26	0	0	1	1	1	1	0	0	0	0	1	0	0	0	0	1	1	0	0	0	1	1	0	0	0	0	0	0	0	1	0	0	0	0	0	0	1	1	0	0	0	0	2	0	0	0	2	0	0
PS41_30_2_bin.27	0	0	0	0	0	0	0	0	0	0	1	0	0	0	0	0	0	0	1	0	1	0	0	0	0	0	0	0	0	0	0	0	0	0	1	1	0	1	0	0	0	0	0	0	0	1	1	0	0
PS41_30_2_bin.28	1	0	0	1	0	1	0	0	0	1	1	1	0	0	0	0	0	1	0	0	1	0	5	1	1	0	0	0	0	1	0	0	1	0	0	0	0	1	0	0	0	1	0	0	0	0	0	0	0
PS41_30_2_bin.3	1	0	1	1	0	1	0	0	0	1	0	0	0	0	0	3	0	0	1	1	1	0	3	1	1	0	0	0	0	1	1	0	1	1	0	0	0	1	0	0	0	0	0	0	1	0	1	1	0
PS41_30_2_bin.30	1	1	2	1	1	1	1	1	0	1	1	1	0	0	0	1	1	1	0	0	1	0	2	0	0	0	0	0	0	1	1	0	0	0	1	0	0	1	0	0	0	0	0	0	0	0	0	0	0
PS41_30_2_bin.31	1	1	1	2	1	1	2	4	1	1	0	1	0	0	0	2	1	1	0	0	0	1	6	0	0	0	0	0	0	0	0	0	1	0	0	0	0	1	0	0	0	0	0	0	1	1	0	0	0
PS41_30_2_bin.32	1	1	0	1	2	3	0	0	0	1	1	0	0	0	0	1	0	0	0	1	1	1	5	1	1	7	0	0	0	0	1	0	1	0	0	0	1	1	0	0	0	0	0	0	0	0	0	0	1
PS41_30_2_bin.33	0	1	1	1	3	2	0	1	1	0	1	1	0	0	0	0	0	1	0	0	1	0	1	0	0	0	0	0	0	0	0	0	0	0	0	0	0	0	0	0	0	0	0	0	0	1	0	0	1
PS41_30_2_bin.34	0	0	0	0	0	0	0	0	0	0	1	1	1	0	0	0	1	1	0	0	1	1	7	0	0	0	0	0	0	0	0	0	1	0	0	0	0	1	0	0	0	0	0	0	0	1	0	0	0
PS41_30_2_bin.36	1	1	0	0	0	0	1	1	0	1	0	1	0	0	0	1	1	1	0	1	1	0	10	0	0	0	0	1	1	0	1	1	1	0	1	0	0	1	0	0	0	0	0	0	0	1	0	0	1
PS41_30_2_bin.41	0	0	0	0	0	1	0	0	0	0	1	0	0	0	0	0	1	0	1	1	0	1	4	1	1	0	0	0	0	1	0	0	1	1	0	0	1	1	0	0	0	1	0	0	0	0	0	0	0
PS41_30_2_bin.42	1	1	1	1	1	1	1	1	1	1	0	1	0	0	0	2	1	1	0	0	0	0	9	0	0	0	0	0	1	1	0	0	1	1	1	1	0	0	0	0	0	0	0	0	0	0	0	0	0
PS41_30_2_bin.45	0	0	0	0	0	0	0	0	0	0	1	1	0	0	0	0	0	1	0	0	1	0	1	0	0	0	0	0	0	0	1	0	1	0	1	1	0	1	0	0	0	0	0	0	1	0	0	0	0
PS41_30_2_bin.46	0	0	0	0	0	0	0	0	0	0	1	0	0	0	0	0	0	0	0	0	1	0	0	0	0	0	0	0	0	0	0	0	0	0	0	0	0	1	0	0	0	1	0	0	0	1	1	0	0
PS41_30_2_bin.47	0	0	0	0	0	0	0	0	0	0	1	1	0	0	0	0	0	1	1	1	1	0	3	0	0	0	0	1	0	1	1	0	0	0	1	0	1	1	0	0	0	1	1	0	0	0	0	0	1
PS41_30_2_bin.48	2	1	1	0	1	0	0	0	0	2	1	1	0	0	0	1	0	1	1	1	1	1	1	1	1	0	0	0	0	1	1	0	1	1	1	0	1	1	1	0	0	1	0	0	0	0	0	0	1
PS41_30_2_bin.49	1	0	1	0	0	1	0	0	0	1	1	0	0	1	0	1	0	0	0	0	1	1	1	0	0	0	0	0	1	0	0	0	1	0	1	0	0	1	0	0	0	1	0	0	0	1	0	0	0
PS41_30_2_bin.51	1	1	0	1	1	3	0	0	0	1	1	0	0	0	0	0	0	0	1	0	0	0	2	0	0	1	0	0	0	1	0	0	1	0	0	0	0	1	0	0	0	1	0	0	0	1	2	0	0
PS41_30_2_bin.53	1	1	1	1	2	1	0	1	0	1	1	1	0	0	0	1	0	1	1	1	0	0	0	0	0	1	0	0	0	1	0	0	0	0	0	0	0	1	0	0	0	1	0	0	0	0	1	0	1
PS41_30_2_bin.55	1	2	0	0	1	1	0	0	0	1	1	0	0	0	0	0	0	0	1	0	1	1	0	0	0	0	0	0	0	0	0	0	0	0	1	0	1	0	0	0	0	1	0	0	1	0	0	0	0
PS41_30_2_bin.56	0	0	0	0	0	0	0	0	0	0	0	0	0	0	0	0	0	0	1	0	0	1	0	0	0	0	0	0	0	1	1	0	1	1	1	0	0	1	0	0	0	0	0	0	0	0	0	0	0
PS41_30_2_bin.59	0	0	0	0	0	0	0	0	0	0	1	0	0	0	0	0	0	0	1	1	1	1	0	0	0	0	0	0	0	1	0	0	1	1	0	0	1	1	0	1	0	0	0	0	0	1	0	0	0
PS41_30_2_bin.60	1	0	1	1	1	1	0	0	0	1	0	0	0	0	0	1	0	0	1	1	0	0	2	1	1	0	0	0	0	1	1	1	1	0	1	0	0	1	0	0	0	1	0	0	1	0	0	0	0
PS41_30_2_bin.63	0	0	0	0	0	1	0	0	0	0	0	1	0	0	0	0	0	1	0	0	0	0	0	1	1	1	0	0	0	1	0	0	1	0	0	0	0	0	0	0	0	0	0	0	0	0	0	0	0
PS41_30_2_bin.65	1	1	1	0	2	1	1	1	1	1	0	0	0	0	0	0	1	0	0	0	0	0	2	0	0	0	0	1	0	0	0	0	0	0	0	0	0	1	0	0	0	0	0	0	0	0	2	1	0
PS41_30_2_bin.68	0	1	0	0	1	1	1	1	1	0	1	0	1	1	0	1	1	0	0	0	1	1	6	0	0	0	0	2	0	0	0	0	0	0	0	0	1	1	0	0	0	0	0	0	0	0	0	0	0
PS41_30_2_bin.69	1	0	1	1	1	2	0	0	0	1	1	1	0	1	0	0	1	1	0	0	0	0	0	0	0	0	0	0	0	1	1	0	0	1	1	0	0	0	0	0	0	0	0	0	0	1	0	0	0
PS41_30_2_bin.7	1	1	1	1	0	1	0	0	0	1	1	1	0	0	0	0	0	1	0	0	1	0	4	1	1	1	0	0	0	1	0	0	1	0	1	0	0	1	0	0	0	0	0	0	0	0	1	0	0
PS41_30_2_bin.70	1	1	1	1	2	2	1	1	1	1	1	1	0	0	0	1	1	1	0	0	0	0	7	0	0	0	0	0	0	0	0	0	1	1	0	0	0	1	0	0	0	0	0	0	0	0	0	0	0
PS41_30_2_bin.71	1	1	2	1	2	2	0	0	0	1	0	1	0	0	0	1	1	1	0	0	0	0	29	2	2	0	0	0	0	0	1	0	0	0	1	1	0	1	0	0	0	2	0	0	1	0	1	0	1
PS41_30_2_bin.72	1	1	1	1	1	1	2	2	1	1	0	1	0	0	0	3	1	1	0	0	0	0	0	0	0	0	0	0	0	1	1	1	0	1	1	0	0	1	0	1	0	0	0	0	0	1	0	0	0
PS41_30_2_bin.73	0	0	0	0	0	0	0	0	0	0	0	0	0	0	0	0	1	0	0	0	0	0	4	0	0	0	0	0	0	0	0	0	1	0	0	0	0	0	0	0	0	0	0	0	0	0	0	0	0
PS41_30_2_bin.74	0	1	1	1	1	1	1	1	1	0	1	1	1	1	0	1	1	1	0	0	1	0	2	0	0	0	0	0	0	1	0	0	0	0	0	0	1	1	0	0	0	0	1	0	1	1	1	1	0
PS41_30_2_bin.75	1	1	1	1	1	1	1	1	1	1	0	1	0	0	0	1	0	1	0	0	0	0	4	0	0	0	0	0	0	1	1	0	0	0	1	1	0	1	0	0	0	0	0	0	0	1	1	0	0
PS41_30_2_bin.9	2	1	1	1	1	1	1	1	0	2	1	1	0	0	0	2	1	1	0	0	1	0	0	0	0	0	0	0	0	0	1	0	1	1	0	1	1	1	0	0	0	0	0	0	0	0	0	0	0
PS52_06_1_bin.1	0	0	1	2	0	2	0	0	1	0	1	0	0	0	0	2	0	0	1	1	1	1	4	4	4	0	0	0	0	0	0	0	0	0	1	1	1	1	1	0	0	0	1	0	0	0	0	1	0
PS52_06_1_bin.14	1	0	2	2	2	1	0	0	0	1	1	2	0	0	0	1	1	2	0	0	0	1	4	0	0	0	0	0	0	0	0	0	0	0	0	1	0	1	0	0	0	0	1	0	1	1	0	1	0
PS52_06_1_bin.15	0	0	0	0	0	1	0	0	0	0	1	0	0	0	0	0	0	0	0	0	1	1	3	0	0	0	0	1	0	1	0	0	0	0	0	0	0	1	0	0	2	2	0	0	0	1	0	0	0
PS52_06_1_bin.18	2	1	0	0	1	0	0	0	0	2	1	1	1	1	0	0	0	1	1	1	0	1	1	0	0	0	0	0	0	1	1	0	0	0	1	0	1	1	0	0	0	1	0	0	0	1	1	0	1
PS52_06_1_bin.19	1	1	1	1	0	0	0	1	1	1	1	1	0	0	0	1	0	1	0	0	1	1	1	0	0	0	0	0	0	0	0	0	1	0	0	0	0	1	0	0	0	1	0	0	0	0	3	0	1
PS52_06_1_bin.20	1	1	1	1	1	1	2	0	1	1	1	1	0	0	0	1	1	1	1	1	0	0	11	0	0	0	0	0	0	0	1	0	0	0	1	0	1	1	1	0	0	1	0	1	0	1	1	1	1
PS52_06_1_bin.21	0	0	0	0	0	0	0	0	0	0	1	0	0	0	0	0	0	0	1	0	0	0	0	0	0	8	0	0	0	0	0	0	0	0	0	0	0	1	0	0	0	1	0	0	0	1	1	0	0
PS52_06_1_bin.22	0	0	0	0	0	1	0	0	0	0	1	0	0	0	0	1	0	0	1	1	1	0	2	1	1	0	0	0	0	1	1	0	0	1	0	0	1	1	1	0	0	1	0	0	0	0	2	1	1
PS52_06_1_bin.23	0	0	1	1	1	1	0	0	0	0	1	0	0	0	0	1	0	0	1	1	0	0	0	0	0	0	0	0	0	1	0	0	0	0	1	1	1	0	0	0	0	1	0	0	0	0	1	1	1
PS52_06_1_bin.24	1	1	1	1	1	0	2	1	0	1	1	0	0	0	0	1	0	0	1	1	1	0	3	0	0	1	0	0	0	0	1	0	1	0	0	0	1	1	0	0	0	1	1	0	0	1	1	1	1
PS52_06_1_bin.25	0	1	0	1	0	1	0	0	0	0	1	0	0	0	0	1	0	0	1	1	0	0	3	1	1	0	0	0	0	1	0	0	1	1	0	0	1	1	0	0	0	1	0	0	0	0	0	0	0
PS52_06_1_bin.27	2	1	1	1	1	1	0	0	0	2	0	1	0	0	0	1	0	1	1	0	1	0	1	0	0	0	0	0	1	1	0	0	0	1	1	0	0	1	0	0	0	0	0	0	1	0	1	2	0
PS52_06_1_bin.29	1	0	1	1	2	2	2	1	1	1	1	0	0	0	0	2	0	0	1	0	1	0	0	0	0	0	0	0	0	1	0	0	0	0	0	0	0	1	0	0	0	0	0	0	1	0	0	0	0
PS52_06_1_bin.3	0	0	0	0	0	0	0	0	0	0	0	1	0	0	0	1	0	1	0	1	0	1	2	3	3	0	0	0	0	1	0	0	0	1	0	1	0	1	0	0	0	1	0	0	0	0	2	1	0
PS52_06_1_bin.30	1	1	1	1	2	2	0	0	0	1	1	2	0	0	0	1	1	2	1	1	1	0	5	14	14	0	0	1	0	1	0	0	1	1	0	0	0	1	0	0	1	1	0	0	0	0	0	0	0
PS52_06_1_bin.32	0	0	0	0	0	0	0	0	0	0	1	0	0	0	0	0	0	0	0	0	0	0	0	0	0	0	0	0	0	0	0	0	0	0	1	0	0	1	0	0	0	0	0	0	0	0	1	0	0
PS52_06_1_bin.34	0	0	0	0	0	1	0	0	0	0	1	1	1	0	0	1	2	1	1	1	1	1	0	0	0	0	0	0	0	1	1	0	0	0	0	0	1	1	0	0	0	0	1	0	0	1	2	0	0
PS52_06_1_bin.35	1	1	1	1	1	2	1	0	1	1	1	1	0	0	0	1	1	1	0	0	0	0	2	2	2	0	0	0	0	1	0	1	0	0	1	0	0	1	0	0	0	0	0	0	0	0	0	0	0
PS52_06_1_bin.39	0	1	1	1	2	2	1	1	1	0	0	1	0	0	0	1	1	1	1	1	1	0	7	0	0	1	0	0	0	0	1	1	0	0	1	0	0	1	0	0	0	0	0	0	0	0	0	0	1
PS52_06_1_bin.4	1	1	1	2	2	1	0	0	0	1	1	1	0	0	0	1	0	1	1	0	0	0	2	0	0	0	0	0	0	1	0	0	0	0	0	0	1	1	0	0	0	0	1	0	0	2	1	0	0
PS52_06_1_bin.42	1	1	1	1	2	2	1	1	1	1	1	1	0	0	0	1	1	1	0	1	1	0	5	1	1	0	0	0	1	1	0	0	0	1	0	0	1	1	0	0	0	0	0	0	0	0	1	0	0
PS52_06_1_bin.43	1	1	1	1	1	3	0	0	0	1	0	0	0	0	0	1	1	0	0	0	1	0	0	0	0	0	0	0	0	1	0	0	1	0	0	0	0	1	0	0	0	1	0	0	0	0	1	1	0
PS52_06_1_bin.46	1	1	1	1	2	2	1	0	0	1	1	0	0	0	0	2	0	0	0	0	0	0	0	0	0	0	0	0	0	1	0	0	1	0	0	0	1	1	0	1	1	0	0	0	0	0	0	0	0
PS52_06_1_bin.5	1	1	2	1	1	1	0	0	0	1	1	0	0	0	0	2	0	0	1	1	1	1	6	0	0	0	0	0	0	0	0	1	1	0	1	0	1	1	0	0	0	0	1	0	0	1	3	0	1
PS52_06_1_bin.50	0	0	0	0	0	0	1	1	1	0	1	0	0	0	0	2	0	0	0	0	0	0	0	0	0	0	0	0	0	1	1	0	0	1	0	0	1	1	0	0	0	0	2	0	0	1	1	0	0
PS52_06_1_bin.52	2	1	1	1	1	1	0	0	0	2	1	0	0	0	0	0	0	0	1	1	0	1	1	0	0	0	0	0	0	0	0	0	1	1	1	0	0	1	0	0	0	0	1	0	2	0	2	0	0
PS52_06_1_bin.55	1	2	0	0	1	1	0	0	0	1	1	2	0	0	0	1	0	2	0	0	1	0	2	0	0	0	0	0	0	1	0	0	1	0	0	0	0	1	1	0	0	0	1	0	1	0	1	0	1
PS52_06_1_bin.56	0	0	0	0	2	2	1	1	0	0	1	0	0	0	0	2	1	0	0	0	0	0	0	0	0	0	0	0	0	1	0	0	1	0	0	0	0	0	0	0	0	0	0	0	0	0	0	0	0
PS52_06_1_bin.59	0	0	0	0	0	0	0	0	0	0	1	0	0	0	0	0	0	0	1	1	1	1	0	0	0	0	0	0	0	0	0	0	0	0	1	0	0	1	0	0	0	1	0	0	1	1	0	0	0
PS52_06_1_bin.6	0	0	0	0	0	0	0	0	0	0	1	0	0	0	0	0	0	0	1	0	0	1	0	0	0	0	0	0	0	0	0	0	1	0	1	1	1	1	0	0	0	1	0	0	0	0	0	0	1
PS52_06_1_bin.60	2	1	0	0	1	0	0	0	0	2	1	0	0	1	0	1	0	0	1	1	0	1	0	0	0	0	0	1	0	1	0	0	1	1	0	0	1	1	0	0	0	1	0	0	0	0	1	1	1
PS52_06_1_bin.62	0	0	0	0	0	0	1	2	0	0	1	1	0	0	0	1	1	1	1	1	1	0	0	0	0	0	0	0	0	0	0	0	0	0	1	0	0	1	0	0	0	0	0	0	1	0	1	0	0
PS52_06_1_bin.64	0	0	0	0	0	0	0	0	0	0	1	0	0	0	0	0	0	0	1	1	0	1	0	0	0	0	0	0	0	0	0	1	0	0	1	0	1	1	0	0	0	1	0	0	0	1	1	1	1
PS52_06_1_bin.69	2	1	1	1	1	0	1	0	2	2	1	0	0	0	0	2	1	0	1	0	1	1	3	0	0	0	1	0	1	1	0	0	0	0	1	0	1	0	0	0	1	2	1	0	0	0	0	0	0
PS52_06_1_bin.7	2	1	0	1	0	1	0	0	0	2	1	1	0	0	0	1	0	1	1	1	0	0	3	1	1	0	0	0	0	0	1	0	1	1	0	0	1	1	1	0	0	0	1	0	0	1	1	1	0
PS52_06_1_bin.72	1	1	1	0	1	0	1	1	1	1	1	1	0	0	0	2	0	1	1	0	1	1	7	0	0	0	0	0	0	0	1	1	1	1	1	1	1	1	0	0	0	0	0	0	0	0	0	0	0
PS52_06_1_bin.74	1	1	1	1	1	1	0	0	0	1	1	1	0	0	0	2	1	1	0	0	0	1	2	0	0	0	0	0	0	1	1	0	1	1	1	0	0	1	1	0	0	0	0	0	1	0	0	0	0
PS52_06_1_bin.76	1	2	1	1	1	2	0	1	0	1	1	0	1	0	0	2	1	0	0	0	0	0	6	0	0	0	0	2	1	1	1	0	1	0	1	0	1	1	0	0	0	0	0	0	0	0	0	0	0
PS52_06_1_bin.81	0	0	0	0	0	1	0	0	0	0	1	0	0	0	0	0	1	0	0	0	1	0	0	0	0	0	0	0	0	0	0	0	0	0	0	0	1	1	0	0	0	0	0	0	0	0	0	0	0
PS52_06_1_bin.83	2	1	1	1	0	1	0	0	0	2	1	0	0	0	0	0	1	0	1	0	0	0	0	0	0	0	0	0	1	1	0	0	1	1	1	0	1	0	0	0	0	0	2	0	0	0	1	0	0
PS52_06_1_bin.84	1	0	2	1	1	1	0	2	0	1	0	1	0	0	0	0	1	1	0	0	0	0	9	0	0	0	0	0	0	1	0	0	0	0	1	0	0	0	0	0	0	0	0	0	0	0	0	0	0
PS52_06_1_bin.85	1	1	1	1	2	2	1	1	0	1	0	0	0	0	0	2	0	0	0	0	0	0	0	0	0	0	0	0	0	1	1	1	1	0	1	1	0	0	0	0	0	0	0	0	0	0	0	0	0
PS52_06_1_bin.9	1	1	1	1	1	1	0	0	0	1	1	0	0	0	0	2	1	0	0	0	0	0	1	1	1	0	0	0	0	1	1	0	1	0	0	0	0	1	0	0	0	0	0	0	0	0	1	0	0
PS52_06_2_bin.10	1	1	1	1	1	2	0	1	0	1	1	0	0	0	0	1	1	0	1	0	0	1	0	0	0	0	0	0	0	0	1	0	0	0	1	0	0	1	0	0	0	0	0	0	1	0	0	0	0
PS52_06_2_bin.15	1	1	1	1	2	2	0	1	1	1	1	1	0	0	0	1	1	1	1	1	0	1	0	0	0	0	0	0	0	1	1	0	0	0	1	1	1	1	0	0	0	0	1	0	1	0	1	1	1
PS52_06_2_bin.17	1	1	0	0	0	1	0	0	0	1	0	0	0	0	0	1	1	0	0	0	0	0	5	1	1	0	0	0	0	1	0	0	0	0	1	1	0	0	0	0	0	0	0	0	0	1	0	0	0
PS52_06_2_bin.2	0	1	0	1	2	1	0	1	0	0	1	0	0	0	0	1	0	0	1	1	0	0	2	0	0	0	0	1	0	0	0	0	0	0	1	0	1	1	0	0	0	0	0	0	0	1	1	1	1
PS52_06_2_bin.20	1	1	1	1	2	2	0	0	1	1	1	1	0	0	0	1	1	1	0	0	1	0	4	2	2	0	0	0	1	0	0	0	1	0	0	0	0	1	0	0	2	1	0	0	0	0	1	0	0
PS52_06_2_bin.22	1	1	1	1	1	1	0	0	0	1	1	1	0	0	0	1	1	1	1	1	1	1	2	0	0	0	0	0	0	0	0	0	0	0	0	0	1	1	0	0	0	1	0	0	0	0	0	0	0
PS52_06_2_bin.23	1	1	1	1	1	1	0	1	1	1	1	1	1	0	0	1	1	1	1	1	1	1	4	0	0	0	0	1	0	0	0	0	0	0	1	0	0	1	1	0	0	1	0	0	2	0	1	0	0
PS52_06_2_bin.24	1	1	1	1	1	1	1	1	1	1	1	1	0	0	0	1	1	1	1	1	0	1	2	0	0	0	0	0	0	1	1	0	1	1	0	0	1	1	1	0	0	1	1	0	0	2	2	1	0
PS52_06_2_bin.29	0	0	0	0	0	0	0	0	0	0	1	0	0	0	0	0	0	0	0	0	1	1	3	4	4	0	0	0	0	1	0	1	1	1	1	0	0	1	0	0	0	0	0	0	1	0	0	0	0
PS52_06_2_bin.30	1	1	1	1	2	2	1	1	0	1	1	1	0	0	0	1	1	1	1	1	0	1	0	0	0	0	0	0	0	1	1	1	1	1	1	0	0	1	0	0	0	1	0	0	1	0	0	0	0
PS52_06_2_bin.33	1	2	1	2	2	2	0	0	0	1	1	2	0	0	0	1	1	2	1	0	1	1	5	14	14	0	0	1	0	1	0	1	1	1	1	1	1	1	0	0	0	0	1	0	0	1	0	0	0
PS52_06_2_bin.34	1	1	1	1	2	2	2	2	1	1	1	0	0	0	0	3	0	0	1	1	0	0	0	0	0	0	0	0	0	0	0	0	1	0	1	0	1	1	1	0	0	0	1	0	0	1	1	1	0
PS52_06_2_bin.35	0	0	0	0	0	0	0	0	0	0	1	1	0	0	0	1	1	1	1	1	0	1	2	0	0	0	0	0	0	1	1	0	1	1	1	1	1	1	1	0	0	0	1	1	0	0	0	1	1
PS52_06_2_bin.36	0	0	0	0	0	0	0	0	0	0	1	1	0	0	0	1	0	1	1	1	0	1	0	0	0	0	0	0	0	0	0	0	0	0	0	0	0	1	1	0	0	0	1	0	1	0	0	0	0
PS52_06_2_bin.38	0	0	0	0	0	1	0	0	0	0	1	0	0	0	0	1	1	0	0	0	0	0	4	3	3	0	0	1	0	0	0	0	0	0	1	0	1	1	0	0	0	1	0	1	0	0	1	1	1
PS52_06_2_bin.39	1	1	1	0	0	0	0	0	0	1	0	1	0	0	0	0	0	1	0	0	0	0	2	0	0	6	0	0	0	0	1	0	1	0	0	0	0	1	0	0	0	1	0	0	0	1	1	1	1
PS52_06_2_bin.4	0	0	0	0	0	0	0	0	0	0	0	0	0	0	0	0	0	0	0	0	0	1	2	0	0	0	0	0	0	1	0	0	0	0	0	0	0	1	0	0	0	1	0	0	0	0	1	0	0
PS52_06_2_bin.40	1	0	1	1	1	2	0	0	0	1	1	0	0	0	0	1	0	0	1	1	0	1	0	0	0	0	0	0	0	1	1	1	0	0	1	0	1	1	0	0	0	1	0	0	0	0	0	0	0
PS52_06_2_bin.48	1	1	1	0	2	2	1	1	1	1	1	1	0	0	0	1	1	1	1	1	1	0	0	0	0	0	0	0	0	1	0	0	1	0	1	0	1	1	0	0	0	0	1	0	0	2	0	1	0
PS52_06_2_bin.49	0	0	0	0	0	2	0	0	0	0	1	0	0	0	0	1	1	0	1	1	0	1	3	2	2	0	0	0	0	0	0	1	0	0	0	1	1	1	0	0	0	1	1	0	0	2	1	0	0
PS52_06_2_bin.5	0	1	0	0	2	2	2	2	1	0	1	0	0	0	0	3	0	0	1	1	1	0	0	0	0	0	0	0	0	0	0	0	0	0	1	0	1	1	0	0	0	1	1	0	0	1	1	1	0
PS52_06_2_bin.52	0	0	0	0	0	0	0	0	0	0	1	0	0	0	0	1	0	0	0	0	0	1	0	0	0	0	0	0	0	1	1	0	1	1	1	0	0	1	0	0	0	0	1	0	1	0	1	0	0
PS52_06_2_bin.57	1	1	1	1	3	4	0	0	0	1	1	2	0	0	0	4	1	2	1	1	0	0	0	0	0	0	0	0	0	0	1	0	1	0	1	0	1	1	0	0	0	1	1	0	0	2	1	1	1
PS52_06_2_bin.59	0	0	0	0	0	0	0	0	0	0	1	1	0	0	0	0	1	1	0	0	1	0	4	0	0	0	0	0	0	1	0	0	0	0	1	0	0	1	1	0	0	0	1	0	1	0	1	0	0
PS52_06_2_bin.61	2	1	1	1	1	0	0	1	1	2	1	1	0	1	0	0	0	1	1	1	0	0	4	0	0	0	0	1	0	1	0	0	1	0	1	1	1	0	0	0	0	2	2	0	0	1	1	0	0
PS52_06_2_bin.63	0	4	1	2	2	1	0	0	0	0	1	1	0	0	0	1	0	1	1	0	1	0	2	6	6	3	0	1	0	1	0	0	0	0	0	0	0	1	0	0	0	0	0	0	0	0	0	0	0
PS52_06_2_bin.65	1	2	0	1	3	5	0	0	0	1	0	1	1	0	0	1	2	1	0	0	0	0	1	0	0	0	0	0	0	0	0	0	0	0	0	0	0	1	0	0	3	1	0	0	0	0	0	0	0
PS52_06_2_bin.7	1	1	1	1	3	3	1	1	0	1	0	1	0	0	0	1	1	1	1	0	1	1	1	0	0	0	0	0	0	0	1	0	1	1	0	1	0	1	0	0	0	0	0	1	1	0	1	0	0
PS52_06_2_bin.9	1	1	1	1	2	2	0	0	0	1	1	1	0	0	0	0	2	1	1	1	0	1	1	0	0	1	0	0	0	1	0	0	0	0	1	0	1	1	0	0	0	1	0	1	0	1	1	0	2
PS52_18_1_bin.1	1	1	1	1	1	1	1	1	0	1	0	1	0	0	0	1	1	1	0	0	0	0	9	0	0	0	0	0	0	0	1	0	0	0	1	0	0	1	0	0	0	0	0	0	0	0	0	1	0
PS52_18_1_bin.11	0	1	1	0	1	2	0	0	0	0	1	0	0	0	0	1	0	0	1	1	0	0	0	0	0	0	0	0	0	1	1	1	1	0	1	0	0	1	1	0	2	0	0	0	0	0	0	0	0
PS52_18_1_bin.12	0	0	0	0	0	0	0	0	0	0	1	0	0	0	0	0	0	0	0	0	0	1	0	0	0	0	0	0	0	0	0	0	1	0	0	0	1	1	0	0	0	0	1	0	0	1	0	0	0
PS52_18_1_bin.16	0	0	0	0	0	0	0	0	0	0	1	0	0	0	0	0	0	0	1	1	0	0	0	0	0	0	0	0	0	0	0	0	1	0	0	0	1	1	0	0	0	1	0	1	0	0	1	1	1
PS52_18_1_bin.18	1	1	1	1	1	1	0	0	0	1	1	0	0	0	0	1	1	0	0	1	1	1	3	0	0	5	0	0	0	0	0	0	1	0	0	0	0	1	0	0	0	0	0	1	0	0	2	0	0
PS52_18_1_bin.2	1	1	1	0	1	2	0	1	2	1	1	1	0	0	0	2	0	1	0	0	0	0	4	0	0	0	1	0	0	1	0	0	1	1	0	1	1	1	0	0	0	1	2	0	0	1	1	1	1
PS52_18_1_bin.20	0	0	0	0	0	0	0	0	0	0	1	0	0	0	0	2	1	0	1	0	1	1	5	0	0	0	0	0	0	0	1	0	1	1	1	0	1	1	1	0	0	1	0	0	0	0	0	0	0
PS52_18_1_bin.23	1	1	1	1	2	2	1	1	1	1	1	0	0	0	0	2	1	0	1	1	0	0	0	0	0	0	0	0	0	1	1	0	1	0	1	0	0	1	1	0	0	0	0	0	1	0	0	0	0
PS52_18_1_bin.26	1	1	0	1	3	2	0	1	0	1	1	1	0	0	0	0	0	1	1	1	0	1	1	0	0	0	0	0	0	1	1	1	0	0	1	0	1	1	0	0	0	0	0	0	0	1	1	0	1
PS52_18_1_bin.27	1	1	1	1	2	2	0	0	0	1	1	1	0	0	0	1	1	1	1	1	0	1	0	0	0	0	0	0	0	0	1	0	0	0	1	0	1	1	1	0	0	0	1	0	0	2	1	0	1
PS52_18_1_bin.28	0	0	0	0	0	0	0	0	0	0	1	0	0	0	0	0	0	0	0	0	1	0	2	1	1	0	0	0	0	0	1	0	1	0	0	1	0	1	1	0	0	0	0	0	1	0	1	0	0
PS52_18_1_bin.29	1	1	0	0	1	1	0	0	1	1	1	0	0	0	0	1	0	0	1	1	1	1	3	0	0	0	0	0	1	1	1	0	1	0	0	0	0	1	1	0	1	0	1	0	1	0	1	0	0
PS52_18_1_bin.3	1	1	1	1	0	1	0	0	0	1	1	1	0	0	0	1	1	1	1	1	1	1	5	0	0	0	0	0	0	0	0	0	0	0	1	0	1	1	0	0	0	1	0	1	0	1	2	1	1
PS52_18_1_bin.30	1	1	1	0	0	2	0	0	0	1	1	1	0	0	0	1	1	1	1	1	1	1	1	0	0	1	0	0	0	0	1	0	1	0	0	0	0	1	0	0	0	1	0	0	0	0	0	0	0
PS52_18_1_bin.33	1	1	1	1	0	0	0	0	0	1	1	2	0	0	0	1	1	2	1	1	1	1	0	0	0	0	0	1	0	1	0	0	0	0	0	1	1	1	0	0	0	0	1	0	0	1	0	0	0
PS52_18_1_bin.34	0	0	0	0	0	1	0	0	0	0	1	1	0	0	0	1	0	1	0	0	1	1	0	0	0	0	0	0	0	0	1	1	1	1	1	1	0	1	0	0	1	0	0	0	0	0	0	0	0
PS52_18_1_bin.35	1	1	1	0	0	0	1	1	0	1	1	1	0	0	0	2	0	1	0	0	0	0	5	0	0	3	0	0	1	0	0	0	0	0	0	0	0	0	0	0	0	0	0	0	0	0	0	0	0
PS52_18_1_bin.37	1	1	1	0	2	2	0	0	0	1	0	1	1	1	0	1	0	1	0	0	0	0	1	0	0	0	0	0	0	1	0	0	1	1	0	0	0	0	0	0	0	0	0	0	0	0	1	0	0
PS52_18_1_bin.38	1	1	1	1	1	1	0	0	0	1	1	0	0	0	0	1	1	0	1	1	1	0	0	0	0	0	0	0	0	1	1	0	1	0	1	0	1	1	0	1	0	0	0	0	0	1	0	0	1
PS52_18_1_bin.42	2	2	1	0	1	2	1	1	1	2	1	0	0	0	0	1	0	0	1	0	0	1	6	1	1	0	0	0	1	1	0	0	1	1	0	0	1	1	0	0	0	1	0	0	0	0	0	0	1
PS52_18_1_bin.44	0	0	0	0	0	0	0	0	0	0	0	0	0	0	0	0	0	0	1	0	0	0	0	0	0	0	0	0	0	0	0	0	0	0	1	0	0	1	0	0	0	1	0	0	1	1	0	0	0
PS52_18_1_bin.45	0	0	1	0	0	0	0	0	0	0	1	1	0	0	0	0	0	1	1	1	0	0	3	0	0	0	0	0	0	0	1	1	1	1	1	0	1	1	1	0	0	0	1	0	0	2	1	1	0
PS52_18_1_bin.46	2	1	0	2	0	1	0	0	0	2	1	0	0	0	0	1	0	0	1	0	1	0	0	1	1	0	0	0	1	1	0	0	0	0	0	0	0	1	1	0	0	0	0	0	1	0	0	0	0
PS52_18_1_bin.47	0	0	0	0	0	0	0	0	0	0	1	2	0	0	0	0	2	2	1	1	0	1	2	0	0	0	0	0	0	1	1	0	1	1	0	1	1	1	0	0	0	0	1	1	0	1	1	1	1
PS52_18_1_bin.48	0	0	0	0	0	0	0	0	0	0	0	0	0	1	0	0	1	0	0	0	0	0	11	0	0	0	0	0	0	1	1	1	1	0	1	1	0	1	0	0	0	0	0	0	0	0	0	0	0
PS52_18_1_bin.51	0	0	0	0	0	0	0	0	0	0	1	1	1	0	0	1	1	1	1	1	1	1	1	0	0	0	0	0	0	0	1	0	1	0	0	0	1	1	0	0	0	0	1	0	0	1	0	1	0
PS52_18_1_bin.53	1	1	2	1	0	1	0	0	1	1	1	0	0	0	0	2	0	0	0	0	1	1	7	0	0	0	0	0	0	0	0	0	0	0	0	0	0	1	0	0	2	1	0	0	0	1	0	0	0
PS52_18_1_bin.54	0	0	0	0	0	1	0	0	0	0	1	0	0	1	0	1	1	0	0	0	0	0	0	0	0	0	0	0	0	0	1	1	1	0	1	0	1	1	0	1	1	0	0	0	0	1	0	0	0
PS52_18_1_bin.55	1	1	1	1	2	2	0	1	0	1	1	1	0	0	0	1	1	1	1	0	0	1	4	1	1	0	0	0	1	0	1	0	1	0	1	1	1	1	0	0	0	0	1	0	0	1	0	1	0
PS52_18_1_bin.60	0	0	0	0	0	0	0	0	0	0	1	1	1	1	0	1	1	1	1	1	0	0	0	0	0	1	0	0	0	0	0	0	1	0	0	0	1	1	0	0	0	1	2	0	0	1	1	1	1
PS52_18_1_bin.62	1	1	1	1	3	4	0	0	0	1	0	1	0	0	0	1	0	1	0	0	0	0	0	0	0	0	0	0	0	1	0	1	1	0	1	0	0	1	0	0	1	0	0	0	0	0	0	0	0
PS52_18_1_bin.63	0	0	0	0	0	0	2	2	2	0	1	0	0	0	0	1	0	0	1	1	1	1	1	0	0	0	0	0	1	0	1	1	1	1	1	0	1	1	0	1	0	1	0	0	0	1	0	0	0
PS52_18_1_bin.65	2	1	1	1	1	1	0	0	0	2	1	0	1	1	0	1	0	0	1	1	1	1	1	0	0	0	0	1	0	0	0	0	0	0	0	0	0	1	0	0	0	2	1	0	1	1	0	1	0
PS52_18_1_bin.66	1	1	1	1	2	2	1	1	1	1	1	0	0	0	0	1	0	0	1	0	0	0	0	0	0	0	0	0	0	1	1	1	1	1	1	0	1	1	0	0	0	0	1	0	0	1	1	1	0
PS52_18_1_bin.69	1	2	1	2	2	0	0	0	0	1	1	2	0	0	0	1	1	2	1	0	0	1	4	17	17	0	0	1	0	0	0	0	0	1	0	0	1	1	0	0	0	1	0	0	0	1	1	1	0
PS52_18_1_bin.7	0	0	0	0	0	0	0	0	0	0	0	1	0	0	0	0	1	1	0	0	0	0	3	0	0	0	0	0	0	0	0	0	1	0	0	0	0	0	0	0	0	0	0	0	0	0	0	0	0
PS52_18_1_bin.70	0	0	0	0	0	2	0	0	0	0	0	0	0	0	0	1	0	0	1	0	1	0	1	1	1	0	0	1	0	1	0	0	1	0	0	0	0	1	0	0	0	0	0	0	0	0	0	0	0
PS52_18_1_bin.71	0	0	0	0	0	0	0	0	0	0	1	0	0	0	0	0	0	0	0	0	0	0	0	0	0	0	0	0	0	1	0	0	1	1	0	0	0	0	0	0	0	0	0	0	0	0	0	0	0
PS52_18_1_bin.72	0	0	0	0	0	1	0	0	0	0	1	1	0	0	0	0	1	1	1	0	1	0	2	0	0	0	0	1	0	1	0	0	1	1	0	1	0	1	0	0	0	0	0	0	2	0	0	0	0
PS52_18_1_bin.74	2	1	1	1	0	0	0	0	0	2	1	0	0	0	0	0	0	0	0	1	1	1	2	0	0	0	0	0	0	1	0	1	1	1	1	1	0	1	0	0	0	0	0	0	0	0	0	0	1
PS52_18_1_bin.9	0	1	1	1	1	1	0	0	0	0	0	0	0	0	0	1	0	0	0	0	1	1	0	0	0	1	0	0	0	0	0	0	0	0	1	0	1	1	0	0	0	0	0	1	0	0	0	0	1
PS52_18_2_bin.1	1	1	1	1	2	2	0	1	0	1	1	0	0	0	0	2	1	0	1	1	1	1	0	0	0	0	0	0	0	0	0	1	0	0	0	0	0	1	0	0	1	1	1	0	1	0	1	0	0
PS52_18_2_bin.10	1	1	1	0	2	2	0	2	2	1	1	1	0	0	0	2	1	1	1	0	0	0	7	0	0	0	1	0	1	1	0	0	1	1	0	0	0	1	0	0	0	0	1	0	0	1	2	0	1
PS52_18_2_bin.16	1	1	1	1	1	0	0	0	0	1	1	1	1	0	0	1	1	1	1	1	1	0	1	0	0	0	0	0	0	1	0	1	0	0	1	0	1	0	0	0	0	1	0	0	1	1	0	0	0
PS52_18_2_bin.18	0	1	0	0	0	0	0	0	0	0	1	0	0	0	0	2	0	0	1	1	0	1	0	0	0	0	0	0	0	1	0	0	0	0	0	0	0	1	0	0	0	1	0	0	0	1	1	0	0
PS52_18_2_bin.19	2	2	2	1	1	1	0	0	1	2	1	0	0	0	0	1	0	0	1	1	0	0	9	0	0	0	0	0	0	0	1	0	1	0	0	0	1	1	0	0	0	0	0	0	0	0	0	0	0
PS52_18_2_bin.2	2	1	1	1	0	0	1	1	1	2	1	1	0	0	0	1	1	1	1	1	0	0	7	0	0	0	0	0	1	0	1	1	0	1	1	0	1	1	1	0	0	0	0	0	1	0	0	0	0
PS52_18_2_bin.21	0	0	0	0	0	1	0	0	0	0	1	1	0	0	0	1	1	1	1	1	1	0	3	8	8	8	0	1	0	1	0	0	1	1	0	0	0	1	0	0	0	0	1	0	0	2	0	0	1
PS52_18_2_bin.24	1	0	1	2	0	2	0	0	0	1	1	0	0	0	0	1	0	0	1	1	0	0	1	0	0	0	0	0	2	0	0	0	1	0	0	0	1	1	0	0	0	1	0	0	0	0	0	0	0
PS52_18_2_bin.25	1	1	1	1	2	2	0	0	0	1	1	1	0	0	0	2	1	1	1	1	0	0	39	1	1	0	0	0	0	1	0	1	0	0	1	1	0	1	0	0	0	1	1	0	0	2	1	1	1
PS52_18_2_bin.26	0	0	0	0	0	0	0	0	0	0	1	0	0	0	0	1	0	0	0	0	1	0	0	0	0	0	0	0	0	0	1	1	1	0	1	0	1	1	1	0	0	0	1	0	1	0	1	0	0
PS52_18_2_bin.28	0	0	0	0	0	0	0	0	0	0	1	0	0	0	0	0	0	0	1	1	0	0	0	0	0	0	0	0	0	0	1	0	1	0	1	0	0	1	1	0	2	0	0	0	0	0	0	0	0
PS52_18_2_bin.29	1	1	1	1	2	2	1	1	1	1	0	1	0	0	0	4	1	1	1	1	0	0	32	1	1	0	0	0	0	1	0	0	0	0	1	0	0	1	1	0	0	0	0	0	0	0	1	0	0
PS52_18_2_bin.3	1	1	1	1	1	2	0	0	0	1	0	0	0	0	0	2	0	0	0	0	0	0	2	4	4	0	0	3	0	0	1	0	0	0	1	0	0	1	0	0	0	0	0	0	0	0	0	0	0
PS52_18_2_bin.30	1	0	0	0	0	1	0	0	0	1	0	1	0	0	0	0	1	1	0	1	1	1	1	0	0	0	0	0	0	1	0	1	1	0	1	0	0	1	0	0	0	1	0	0	0	0	2	1	0
PS52_18_2_bin.36	0	0	0	0	0	0	0	0	0	0	0	1	0	0	0	1	1	1	0	0	0	0	0	0	0	0	0	0	0	0	0	0	1	0	1	0	0	1	0	0	0	0	0	0	1	0	0	0	0
PS52_18_2_bin.4	0	0	0	0	0	0	0	0	0	0	1	1	0	0	0	0	1	1	1	1	0	0	2	0	0	0	0	0	0	1	0	0	1	1	1	0	0	1	0	0	0	0	1	0	0	2	1	1	0
PS52_18_2_bin.41	0	0	0	0	0	0	0	0	0	0	1	0	0	0	0	0	0	0	1	1	0	0	7	0	0	0	0	0	0	0	1	0	1	0	0	0	1	1	1	0	0	0	1	0	0	1	1	0	0
PS52_18_2_bin.44	0	0	0	0	0	0	0	0	0	0	1	0	0	0	0	0	0	0	1	0	0	0	0	0	0	5	0	0	0	1	0	0	0	0	0	0	1	1	0	0	0	1	0	0	0	1	1	1	0
PS52_18_2_bin.47	1	0	0	0	0	0	0	1	0	1	1	0	0	0	0	0	0	0	1	1	0	0	0	0	0	0	0	0	0	0	0	0	0	0	0	0	1	1	0	0	0	1	1	0	1	1	0	0	0
PS52_18_2_bin.48	2	1	1	0	2	2	0	0	1	2	1	1	0	0	0	1	1	1	1	1	1	1	1	0	0	0	0	0	0	1	0	0	1	0	0	1	0	1	0	0	0	1	0	0	0	0	0	0	0
PS52_18_2_bin.49	0	0	0	0	0	2	0	0	0	0	1	0	0	0	0	0	0	0	1	1	1	1	4	4	4	0	0	0	0	1	0	0	0	0	0	0	0	1	1	0	0	0	1	0	0	1	0	0	0
PS52_18_2_bin.50	0	3	0	0	3	5	0	0	0	0	1	0	0	0	0	1	0	0	1	1	1	1	5	0	0	0	0	0	0	0	0	0	0	0	0	0	1	1	0	1	0	0	0	0	0	2	0	0	0
PS52_18_2_bin.53	2	0	0	1	0	1	0	0	0	2	1	0	0	0	0	1	0	0	1	1	1	1	0	1	1	0	0	0	0	1	0	0	0	0	1	0	1	1	0	0	0	1	0	1	1	0	1	0	1
PS52_18_2_bin.55	2	1	1	1	0	0	0	0	1	2	1	0	0	0	0	1	1	0	1	0	0	0	0	0	0	0	0	0	0	1	0	0	0	1	1	0	0	1	0	0	0	0	0	0	0	0	0	0	0
PS52_18_2_bin.58	1	1	1	1	2	2	1	1	1	1	1	1	0	0	0	1	0	1	1	1	1	1	5	2	2	0	0	0	1	0	0	0	0	0	0	0	0	0	0	0	0	1	0	0	0	0	2	0	1
PS52_18_2_bin.59	1	1	0	0	1	1	0	0	0	1	1	1	1	1	0	1	0	1	1	1	1	1	0	0	0	0	0	1	0	0	0	1	1	1	1	0	0	1	1	0	0	0	0	0	1	0	0	0	0
PS52_18_2_bin.6	1	0	1	1	0	1	0	0	0	1	1	0	1	1	0	1	0	0	0	0	0	0	1	0	0	0	0	1	0	0	0	0	1	0	0	0	0	1	0	0	0	0	0	0	0	0	0	0	0
PS52_18_2_bin.61	1	1	0	1	1	1	2	2	1	1	1	1	0	0	0	1	1	1	0	0	1	1	1	3	3	0	0	2	0	0	0	0	0	0	0	0	0	1	0	0	3	1	0	0	0	0	0	0	0
PS52_18_2_bin.62	1	1	0	1	2	1	1	1	1	1	0	1	0	0	0	1	1	1	0	0	0	0	1	0	0	0	0	0	0	1	1	0	1	0	0	0	0	1	0	0	0	0	0	0	0	0	0	0	0
PS52_18_2_bin.63	1	1	1	1	1	1	1	1	0	1	1	0	0	0	0	1	0	0	1	1	1	1	4	0	0	0	0	0	1	1	0	0	1	1	0	0	0	0	1	0	0	1	0	0	0	0	1	0	1
PS52_18_2_bin.66	1	1	1	1	1	1	1	1	1	1	1	1	1	1	0	1	1	1	0	0	0	1	1	0	0	0	0	0	1	0	0	0	0	0	0	0	1	1	0	0	0	0	0	0	1	0	0	1	0
PS52_18_2_bin.68	1	1	1	1	2	2	1	1	1	1	1	1	0	0	0	2	1	1	0	0	0	0	6	3	3	0	0	1	1	1	0	0	0	0	0	0	0	1	1	0	0	0	1	0	0	0	0	0	0
PS52_18_2_bin.69	1	1	1	1	1	1	1	1	1	1	1	1	0	0	0	1	1	1	0	0	0	1	3	0	0	0	0	0	1	0	0	0	1	0	0	0	0	0	0	0	0	0	0	0	0	0	0	0	0
PS52_18_2_bin.70	1	0	1	1	1	1	0	0	0	1	1	1	1	0	0	0	0	1	1	0	0	0	1	0	0	0	0	2	2	1	1	1	0	0	1	1	0	1	0	0	0	0	0	0	0	1	2	0	1
PS52_18_2_bin.71	3	1	1	0	2	1	0	1	1	3	0	0	0	0	0	2	0	0	0	0	0	1	0	0	0	0	0	0	0	0	0	0	1	0	0	0	0	1	0	0	0	0	0	0	1	1	0	0	0
PS52_18_2_bin.72	1	0	1	1	2	1	0	0	0	1	0	0	0	0	0	3	0	0	0	0	0	0	0	1	1	0	0	0	0	1	0	0	0	0	1	0	0	1	0	0	0	0	0	0	0	0	0	0	0
PS52_18_2_bin.73	1	1	1	1	1	1	1	1	1	1	1	1	1	1	0	1	1	1	1	0	0	1	0	0	0	0	0	0	1	0	1	0	0	0	1	1	0	0	0	0	0	0	0	0	0	0	0	0	0
PS52_18_2_bin.74	1	1	1	1	2	2	1	1	1	1	1	1	0	0	0	1	1	1	1	1	1	1	5	0	0	0	0	1	1	1	0	0	1	0	0	0	0	1	0	0	0	0	0	0	0	0	0	0	0
PS52_18_2_bin.8	1	1	1	1	2	1	0	0	0	1	1	1	0	0	0	1	0	1	0	0	1	1	5	0	0	0	0	0	0	1	0	1	1	1	1	1	1	1	1	0	0	0	0	0	1	0	0	0	0
PS52_18_2_bin.9	0	0	0	0	0	0	0	0	0	0	0	1	0	0	0	2	0	1	0	0	1	1	0	0	0	0	0	0	0	0	0	0	0	1	0	0	0	1	0	0	0	1	0	0	1	0	0	0	0
RC41_B04_2_bin.1	0	0	0	0	0	1	0	0	0	0	1	1	0	0	0	1	0	1	1	0	0	0	2	3	3	0	0	0	0	1	0	0	0	1	1	0	0	0	0	0	0	0	0	0	0	0	0	0	0
RC41_B04_2_bin.10	1	3	0	1	1	1	0	0	0	1	1	0	0	0	0	1	0	0	1	0	0	0	3	0	0	0	0	0	0	1	1	1	1	0	1	1	0	1	0	0	0	0	0	0	0	0	1	1	0
RC41_B04_2_bin.12	0	0	0	0	0	0	0	0	0	0	1	0	0	0	0	0	0	0	1	1	0	1	0	0	0	0	0	0	0	1	1	0	1	0	0	0	1	1	0	0	0	1	0	0	0	1	1	0	1
RC41_B04_2_bin.13	1	1	1	1	2	1	0	1	1	1	1	0	0	0	0	1	0	0	0	1	0	1	0	0	0	0	0	0	0	1	0	0	1	0	0	0	1	1	0	0	0	1	0	0	0	0	0	0	0
RC41_B04_2_bin.14	1	1	1	1	1	1	0	1	0	1	1	0	0	0	0	1	0	0	0	0	0	1	2	0	0	0	0	1	1	1	1	1	1	0	0	0	0	1	0	0	0	1	0	0	0	0	0	0	0
RC41_B04_2_bin.15	1	0	1	1	3	2	0	1	1	1	1	0	0	0	0	1	0	0	0	0	0	1	5	0	0	4	0	0	0	0	0	0	0	0	0	0	0	1	0	0	0	0	0	0	0	0	0	0	1
RC41_B04_2_bin.17	1	2	1	1	4	3	1	1	1	1	0	2	0	0	0	1	0	2	0	0	0	1	7	0	0	1	0	0	0	1	0	0	1	0	1	0	0	1	0	0	0	1	0	0	0	0	0	0	1
RC41_B04_2_bin.18	0	0	0	0	0	1	1	1	0	0	1	1	0	1	0	1	0	1	1	1	1	1	3	0	0	0	0	0	1	1	0	0	1	0	0	0	0	1	0	0	0	1	0	0	0	1	1	1	1
RC41_B04_2_bin.19	0	0	0	0	0	0	0	0	0	0	1	1	0	0	0	1	0	1	1	1	0	0	3	5	5	1	0	1	0	0	0	0	1	0	0	1	1	1	0	0	0	2	1	0	0	1	1	1	1
RC41_B04_2_bin.2	1	0	1	1	1	0	0	0	0	1	1	1	2	1	0	1	1	1	1	1	0	1	2	0	0	0	0	1	1	1	1	0	1	0	0	1	1	1	0	0	0	2	0	1	0	1	2	1	1
RC41_B04_2_bin.20	0	0	0	0	0	0	2	2	1	0	1	1	0	0	0	1	1	1	1	1	1	1	1	0	0	0	0	0	0	0	0	0	0	0	0	1	1	1	0	0	0	1	0	0	0	0	0	0	1
RC41_B04_2_bin.22	0	0	0	0	0	0	0	0	0	0	0	0	0	0	0	0	0	0	0	1	0	1	0	0	0	1	0	0	0	1	1	0	1	1	0	0	1	1	0	0	0	0	0	0	0	0	0	0	0
RC41_B04_2_bin.23	2	1	1	1	0	0	0	1	1	2	1	0	1	0	0	1	0	0	1	1	0	0	5	0	0	0	0	2	0	0	1	1	0	0	1	0	0	1	0	0	0	0	0	0	0	0	1	0	0
RC41_B04_2_bin.24	1	1	1	1	1	1	1	1	1	1	1	1	0	0	0	2	1	1	0	0	0	1	0	0	0	0	0	0	0	0	0	0	0	0	0	0	1	1	0	0	0	0	0	0	0	1	1	0	1
RC41_B04_2_bin.3	0	0	0	0	0	2	0	0	0	0	1	1	0	0	0	0	0	1	1	1	0	0	0	0	0	0	0	0	0	0	0	0	0	0	1	0	1	1	0	0	0	1	2	0	0	1	1	2	0
RC41_B04_2_bin.5	2	1	1	2	1	1	0	0	0	2	1	0	0	0	0	0	1	0	1	1	0	1	0	0	0	0	0	0	0	0	1	0	1	1	1	0	1	1	0	0	0	0	0	2	0	0	0	0	1
RC41_B04_2_bin.6	1	1	1	1	1	1	1	1	1	1	0	1	0	0	0	0	1	1	0	0	1	1	0	0	0	0	0	0	0	1	1	0	1	0	0	0	1	1	0	0	0	0	0	0	0	0	0	0	0
RC41_B21_3_bin.11	1	1	1	1	1	1	1	1	0	1	1	1	0	1	0	1	0	1	0	0	1	1	1	0	0	0	0	2	0	1	0	0	1	0	1	0	0	1	0	0	0	0	0	0	0	1	1	0	0
RC41_B21_3_bin.14	1	1	0	1	2	2	0	0	0	1	0	0	0	0	0	1	0	0	0	1	0	1	1	1	1	0	0	0	0	0	1	0	1	1	1	0	0	1	0	0	0	0	0	0	0	0	0	0	0
RC41_B21_3_bin.18	1	1	0	1	1	1	0	0	0	1	1	1	0	0	0	1	1	1	1	0	0	0	1	0	0	0	0	4	1	0	0	0	1	0	0	1	0	1	0	0	0	1	0	1	0	0	0	0	0
RC41_B21_3_bin.2	1	1	1	1	2	1	0	0	0	1	1	0	0	0	0	1	0	0	0	0	0	1	0	1	1	0	0	0	0	1	1	0	0	0	0	0	0	1	0	0	0	0	0	0	0	0	0	0	0
RC41_B21_3_bin.22	1	1	1	1	1	1	1	0	0	1	1	1	0	0	0	1	1	1	1	1	0	1	9	0	0	0	0	2	0	0	0	0	0	0	0	0	0	1	0	0	0	1	1	0	0	1	0	1	1
RC41_B21_3_bin.24	0	1	1	1	2	1	2	2	2	0	1	1	0	0	0	3	1	1	1	1	0	1	0	1	1	2	0	0	0	1	0	0	1	0	0	0	0	1	0	0	0	0	1	0	0	1	2	0	1
RC41_B21_3_bin.27	1	1	1	1	2	2	0	0	0	1	0	1	0	0	0	1	1	1	0	0	1	0	6	0	0	0	0	0	1	1	1	0	1	1	0	1	1	1	0	0	0	0	0	0	0	0	0	0	0
RC41_B21_3_bin.28	1	1	1	1	1	1	0	0	0	1	0	0	0	0	0	2	1	0	0	1	1	1	2	1	1	2	0	0	0	1	0	0	0	0	0	0	0	1	0	0	0	0	0	0	0	0	0	1	1
RC41_B21_3_bin.3	0	0	0	0	0	1	0	0	0	0	1	0	0	0	0	0	0	0	1	1	0	0	3	0	0	0	0	0	0	1	1	0	1	0	0	0	0	1	0	0	0	1	0	0	0	0	0	0	0
RC41_B21_3_bin.30	1	1	1	1	3	0	0	0	0	1	1	0	0	0	0	1	0	0	0	0	0	1	0	0	0	0	0	0	0	1	1	0	1	0	1	0	0	1	0	0	0	0	0	0	0	0	0	0	1
RC41_B21_3_bin.32	1	1	0	0	0	0	2	2	1	1	0	1	0	0	0	4	0	1	0	0	0	0	0	0	0	0	0	0	0	0	0	0	1	1	1	0	0	1	0	0	0	0	0	0	0	0	0	0	0
RC41_B21_3_bin.33	1	0	1	1	0	1	0	0	0	1	1	1	1	0	0	0	0	1	1	1	1	1	1	0	0	0	0	1	0	0	1	0	1	1	0	0	0	0	0	0	0	0	2	0	0	1	1	0	1
RC41_B44_1_bin.1	1	1	0	1	2	3	0	0	0	1	1	2	0	0	0	1	1	2	1	1	0	1	8	1	1	0	0	2	0	1	1	0	1	1	0	0	1	1	0	0	0	1	0	1	0	0	0	0	1
RC41_B44_1_bin.10	2	1	1	1	2	2	2	2	1	2	0	1	0	0	0	1	1	1	0	1	0	1	0	1	1	0	0	0	0	0	0	0	1	0	0	0	1	1	0	0	0	0	0	0	0	0	0	0	0
RC41_B44_1_bin.13	1	1	2	1	1	1	0	0	0	1	1	0	0	0	0	0	0	0	1	1	0	1	0	0	0	0	0	0	1	1	1	0	0	1	0	1	0	1	0	1	0	0	0	0	0	0	0	0	0
RC41_B44_1_bin.14	2	0	0	0	0	0	0	1	1	2	1	0	0	0	0	0	0	0	1	1	0	1	0	0	0	0	0	0	0	1	1	0	1	0	0	0	1	1	0	0	0	1	0	0	0	0	0	0	0
RC41_B44_1_bin.17	1	1	1	2	1	1	0	0	0	1	1	0	0	0	0	1	1	0	0	0	0	1	0	1	1	0	0	0	2	1	0	0	1	0	0	0	0	1	0	0	0	0	0	0	0	0	0	0	1
RC41_B44_1_bin.19	0	0	0	0	0	1	0	0	0	0	1	1	0	0	0	1	0	1	0	0	1	0	3	3	3	0	0	0	0	1	1	0	1	1	0	0	0	1	0	0	0	0	0	0	0	1	1	0	0
RC41_B44_1_bin.2	0	0	0	1	1	1	0	0	0	0	1	1	0	0	0	2	1	1	0	0	0	1	4	0	0	0	0	0	0	1	1	0	1	1	0	0	0	1	0	0	0	1	0	0	0	0	0	0	1
RC41_B44_1_bin.20	1	1	1	0	2	2	1	2	3	1	1	1	0	0	0	2	1	1	1	1	0	0	7	0	0	1	1	0	1	1	0	1	1	0	1	0	0	1	0	0	0	0	0	0	0	1	1	0	0
RC41_B44_1_bin.21	2	1	1	1	2	2	1	1	1	2	1	1	0	0	0	1	1	1	1	1	1	1	6	2	2	0	0	0	1	1	0	0	1	1	0	0	0	1	0	0	0	1	0	1	0	1	2	1	0
RC41_B44_1_bin.22	1	1	1	1	1	1	0	0	0	1	1	1	0	0	0	2	1	1	1	1	0	1	4	0	0	1	0	0	0	0	0	0	0	0	1	0	1	1	0	0	0	1	0	0	0	1	1	0	1
RC41_B44_1_bin.23	1	0	1	1	1	0	0	0	0	1	1	0	0	0	0	2	0	0	1	1	0	1	1	0	0	0	0	0	0	0	0	0	1	0	0	0	1	1	1	0	0	0	1	1	0	1	1	1	1
RC41_B44_1_bin.24	1	1	1	1	1	1	1	1	0	1	1	1	0	0	0	1	1	1	0	1	1	1	1	0	0	0	0	2	0	1	0	1	0	0	1	1	1	1	0	0	0	0	0	0	0	1	1	0	0
RC41_B44_1_bin.26	1	2	1	0	2	0	0	0	0	1	1	0	0	0	0	1	0	0	0	0	0	0	1	0	0	0	0	0	0	1	0	0	1	0	1	0	0	1	0	0	0	0	0	0	0	0	0	0	0
RC41_B44_1_bin.28	1	1	1	1	2	2	1	1	1	1	1	1	0	0	0	1	1	1	1	1	0	1	0	0	0	0	0	0	0	0	0	0	1	0	0	0	0	1	0	0	0	0	0	0	0	1	1	0	0
RC41_B44_1_bin.29	1	1	1	1	2	2	1	1	1	1	1	1	0	0	0	2	1	1	1	1	0	0	0	0	0	0	0	0	0	0	0	0	0	0	0	0	1	0	0	0	0	1	0	0	1	0	1	1	0
RC41_F28_1_bin.11	1	1	2	1	1	1	0	1	0	1	1	1	0	0	0	2	0	1	1	1	0	1	8	2	2	1	0	3	0	0	0	0	0	0	0	0	0	1	0	0	0	1	0	0	0	1	1	0	1
RC41_F28_1_bin.12	0	1	1	0	0	2	0	0	0	0	0	1	0	1	0	1	1	1	1	1	0	0	4	0	0	0	0	0	2	0	1	0	1	1	1	1	1	1	0	0	0	0	0	0	0	0	0	0	0
RC41_F28_1_bin.13	1	1	1	2	2	2	0	0	0	1	1	1	0	0	0	2	1	1	0	0	0	0	7	1	1	0	0	2	1	0	1	0	1	1	0	1	0	1	0	0	0	1	0	0	0	0	0	0	0
RC41_F28_1_bin.17	2	0	0	0	1	2	0	0	0	2	1	1	0	0	0	2	1	1	1	1	0	1	3	0	0	0	0	0	0	1	1	0	0	1	0	0	1	1	0	0	0	0	0	0	0	0	0	0	0
RC41_F28_1_bin.20	1	1	1	2	1	1	0	0	0	1	1	1	2	0	0	1	1	1	0	0	1	1	1	0	0	0	0	1	1	0	0	0	1	0	0	0	0	1	0	0	0	1	0	0	0	1	1	0	0
RC41_F28_1_bin.21	1	1	1	2	1	1	2	2	1	1	1	1	0	0	0	3	1	1	1	1	1	1	4	1	1	0	0	0	0	1	0	0	1	0	1	0	0	1	0	0	0	1	0	0	0	1	1	1	1
RC41_F28_1_bin.22	1	1	1	1	1	0	3	3	0	1	1	1	0	0	0	1	1	1	1	1	0	1	3	0	0	0	0	0	0	0	1	0	1	0	0	1	1	1	0	0	0	1	0	0	0	1	1	0	1
RC41_F28_1_bin.24	1	1	1	1	1	2	0	1	0	1	1	0	0	0	0	1	0	0	1	1	0	0	2	0	0	1	0	0	0	0	0	0	0	0	1	1	1	1	0	0	0	1	0	0	0	0	1	1	1
RC41_F28_1_bin.25	1	1	1	1	2	1	1	1	0	1	1	1	0	0	0	2	1	1	1	0	0	1	4	2	2	0	0	0	0	1	0	0	1	0	0	0	1	1	0	0	0	0	0	0	0	0	1	0	0
RC41_F28_1_bin.26	1	0	1	2	1	1	0	0	0	1	1	0	1	1	0	1	0	0	0	0	0	1	1	0	0	0	0	0	1	1	1	1	1	0	1	0	1	1	0	0	0	0	0	0	0	0	0	0	1
RC41_F28_1_bin.31	1	1	1	1	2	2	0	0	0	1	1	1	0	0	0	5	1	1	0	0	0	0	5	0	0	0	0	0	0	1	0	1	1	0	1	0	0	1	0	0	0	0	0	0	0	0	2	0	0
RC41_F28_1_bin.33	2	1	1	2	2	3	0	0	0	2	1	0	0	0	0	3	0	0	1	1	0	0	8	2	2	0	0	2	0	0	1	0	1	0	1	0	0	1	0	0	0	1	0	1	0	0	1	1	1
RC41_F28_1_bin.35	0	0	0	0	0	1	0	0	0	0	1	0	0	0	0	1	0	0	1	1	0	0	4	0	0	1	0	0	0	1	0	0	0	1	1	0	1	1	1	0	0	0	1	0	0	1	1	1	1
RC41_F28_1_bin.37	1	1	1	1	1	1	1	1	1	1	1	1	0	0	0	2	1	1	1	0	0	1	9	0	0	0	0	0	1	0	1	0	1	1	1	1	1	1	0	0	0	0	0	0	0	0	0	0	0
RC41_F28_1_bin.38	0	0	0	0	0	0	0	0	0	0	1	1	0	0	0	0	0	1	1	0	1	1	0	2	2	0	0	0	0	0	0	0	0	0	1	0	1	1	0	0	0	1	0	0	0	0	0	1	1
RC41_F28_1_bin.6	1	1	1	1	1	2	0	0	0	1	1	1	0	0	0	1	1	1	1	1	0	1	9	0	0	0	0	4	0	0	1	0	1	1	1	1	0	1	0	0	0	1	0	1	0	1	2	1	0
RC41_F44_3_bin.11	1	3	1	1	5	3	0	0	0	1	0	0	0	0	0	1	0	0	0	0	1	0	0	0	0	0	0	0	0	1	0	0	1	0	0	0	1	1	0	0	0	0	0	0	0	0	1	0	0
RC41_F44_3_bin.13	0	0	0	0	0	1	0	0	0	0	1	0	0	0	0	0	0	0	1	1	0	0	4	0	0	0	0	0	0	1	1	0	1	0	1	1	0	1	0	0	0	1	0	0	0	0	0	0	1
RC41_F44_3_bin.17	1	0	1	1	0	1	0	0	0	1	1	0	0	0	0	0	0	0	1	1	0	1	0	0	0	0	0	0	0	1	0	0	0	0	1	0	0	1	1	0	0	1	0	0	0	0	2	0	1
RC41_F44_3_bin.18	1	1	1	3	1	1	0	0	0	1	1	2	1	1	0	1	1	2	1	1	1	0	4	0	0	0	0	2	1	0	0	0	0	0	0	0	1	1	0	0	0	1	0	0	0	0	0	1	1
RC41_F44_3_bin.2	0	0	0	0	0	0	0	0	0	0	1	0	0	0	0	0	0	0	1	1	1	1	0	0	0	0	0	0	0	0	0	0	0	0	0	0	0	1	1	0	0	3	0	0	0	1	1	0	0
RC41_F44_3_bin.20	0	0	0	0	0	1	0	0	0	0	1	1	0	0	0	0	0	1	1	1	1	1	2	2	2	0	0	1	0	0	0	0	1	0	0	0	1	1	1	0	0	1	0	0	0	0	2	0	1
RC41_F44_3_bin.21	2	1	1	1	1	0	0	0	0	2	1	0	0	0	0	1	0	0	0	0	1	1	5	1	1	2	0	0	0	0	0	0	1	0	0	0	1	1	0	0	0	0	0	0	0	0	1	0	1
RC41_F44_3_bin.22	1	1	1	1	1	1	0	0	0	1	1	0	0	0	0	2	0	0	1	1	0	0	0	0	0	0	0	0	1	1	1	0	1	0	1	0	0	1	0	0	0	0	0	0	0	0	0	0	0
RC41_F44_3_bin.23	1	1	1	1	1	1	0	0	0	1	1	0	0	0	0	1	1	0	1	1	1	1	0	1	1	0	0	0	0	0	0	0	0	0	1	0	0	1	1	0	0	1	0	0	0	0	1	0	1
RC41_F44_3_bin.24	1	1	1	1	1	1	0	0	0	1	1	0	0	0	0	1	1	0	1	1	1	0	0	1	1	2	0	0	0	1	1	1	1	0	1	1	1	1	0	0	0	2	0	0	1	1	1	1	0
RC41_F44_3_bin.25	0	0	0	0	0	1	0	0	0	0	0	1	0	0	0	0	1	1	1	1	1	0	4	3	3	0	0	0	0	0	1	0	1	0	0	0	1	1	0	0	0	0	0	0	0	0	1	1	1
RC41_F44_3_bin.28	1	1	1	1	2	3	0	0	0	1	1	1	0	0	0	0	1	1	1	1	1	1	2	0	0	0	0	1	0	1	0	1	1	1	1	1	0	1	0	1	0	1	0	0	0	1	0	0	0
RC41_F44_3_bin.29	2	2	1	2	4	4	0	0	0	2	1	1	0	0	0	2	1	1	1	1	0	0	13	2	2	0	0	0	0	0	1	0	0	0	0	1	1	1	0	0	0	0	0	0	0	0	0	0	0
RC41_F44_3_bin.30	1	1	1	1	2	1	0	1	1	1	1	0	0	0	0	1	1	0	1	1	1	1	0	0	0	0	0	0	0	0	0	0	0	0	1	0	0	1	0	0	0	0	0	0	0	0	0	0	1
RC41_F44_3_bin.31	1	1	1	1	1	1	1	1	1	1	1	1	0	0	0	5	0	1	1	1	0	0	0	0	0	0	0	0	0	0	1	0	0	0	0	0	1	1	0	0	0	0	0	0	0	1	0	1	0
RC41_F44_3_bin.34	2	2	2	2	2	3	0	0	0	2	1	1	0	1	0	1	1	1	1	1	0	0	4	0	0	0	0	0	2	1	0	0	1	0	1	0	0	1	0	0	0	0	0	0	0	0	0	0	0
RC41_F44_3_bin.35	1	1	1	1	3	1	0	0	0	1	1	0	0	0	0	1	0	0	1	1	0	1	0	0	0	0	0	0	0	0	1	0	0	0	1	0	1	1	0	0	0	1	0	0	0	0	0	0	1
RC41_F44_3_bin.36	1	1	1	1	2	2	1	1	1	1	0	1	0	0	0	1	1	1	0	0	0	0	4	0	0	1	0	1	0	0	0	0	0	0	0	0	0	1	0	0	0	0	0	0	0	1	0	0	0
RC41_F44_3_bin.37	1	1	1	1	2	2	1	1	1	1	0	1	0	0	0	2	1	1	0	0	0	1	3	1	1	0	0	1	1	0	0	1	0	0	1	0	0	0	0	0	0	0	0	0	0	0	0	1	0
RC41_F44_3_bin.39	0	1	1	1	2	1	1	1	0	0	1	0	0	0	0	2	1	0	0	1	1	1	0	0	0	0	0	0	0	1	1	0	1	1	1	1	0	1	0	0	0	0	0	0	0	1	0	0	0
RC41_F44_3_bin.5	0	0	0	0	0	0	0	0	0	0	1	0	0	0	0	1	0	0	1	1	0	1	0	0	0	0	0	0	0	1	1	1	1	1	1	0	0	1	0	0	0	0	0	1	0	0	0	1	1
RC41_F44_3_bin.6	1	1	1	2	1	2	0	0	0	1	0	0	3	2	0	1	1	0	1	1	1	1	9	1	1	0	0	0	1	1	0	0	1	0	0	0	1	1	0	0	0	0	0	1	0	0	0	1	0
RC41_F44_3_bin.8	1	0	1	0	1	2	0	0	1	1	1	1	0	0	0	1	0	1	1	1	0	1	0	0	0	0	0	0	0	0	0	0	0	0	1	0	0	1	0	0	0	0	0	0	0	1	2	1	1
RC52_B28_1_bin.13	2	2	1	1	2	2	0	1	1	2	1	1	0	0	0	1	1	1	1	1	0	1	5	1	1	0	0	0	1	0	0	1	0	0	0	0	1	1	0	0	0	0	1	0	0	1	1	0	1
RC52_B28_1_bin.20	1	1	1	2	1	1	0	0	0	1	1	0	0	0	0	1	0	0	1	1	1	1	1	0	0	0	0	0	0	1	1	0	1	0	0	0	1	1	0	0	0	1	1	1	0	1	2	1	1
RC52_B28_1_bin.22	0	0	0	0	0	0	0	0	0	0	1	0	0	0	0	1	0	0	1	0	0	0	0	0	0	0	0	0	0	0	1	0	0	0	1	1	1	1	0	0	0	0	1	0	0	1	1	1	1
RC52_B28_1_bin.24	0	0	0	0	0	1	0	0	0	0	1	0	0	0	0	1	0	0	1	1	0	1	3	0	0	0	0	0	0	1	0	0	1	1	0	1	0	1	1	0	0	1	0	1	0	0	1	0	1
RC52_B28_1_bin.25	0	0	0	0	0	1	0	0	0	0	1	1	0	0	0	0	0	1	1	1	1	0	4	0	0	0	0	0	0	1	0	0	1	0	0	0	1	1	0	0	0	0	0	0	0	0	0	1	1
RC52_B28_1_bin.26	0	0	0	0	0	0	0	0	0	0	0	0	2	1	0	1	0	0	1	1	0	0	6	0	0	0	0	0	0	0	1	0	1	1	0	1	0	1	0	0	0	0	0	0	0	1	0	0	0
RC52_B28_1_bin.27	1	0	1	1	1	1	0	0	0	1	1	1	2	1	0	1	1	1	1	1	0	1	7	0	0	5	0	0	1	1	1	0	1	0	1	0	0	1	0	0	0	1	0	0	0	1	1	1	1
RC52_B28_1_bin.33	0	0	0	0	0	0	0	0	0	0	1	0	0	0	0	0	0	0	1	1	0	1	5	0	0	0	0	0	0	0	1	0	1	0	1	0	1	1	0	0	0	2	0	0	0	1	2	1	1
RC52_B28_1_bin.34	0	0	0	0	0	0	0	0	0	0	1	0	6	1	1	0	0	0	1	1	0	0	5	0	0	0	0	0	0	0	0	1	0	1	1	0	1	1	0	0	0	1	0	0	0	1	0	0	1
RC52_B28_1_bin.35	1	1	1	1	2	2	2	1	2	1	1	1	0	0	0	3	1	1	1	1	0	0	0	1	1	0	0	0	0	0	0	0	0	0	0	0	1	1	0	0	0	0	0	0	0	1	0	0	1
RC52_B28_1_bin.37	0	0	0	0	0	0	0	0	0	0	1	0	2	1	0	1	1	0	1	0	0	0	4	0	0	0	0	0	0	0	1	0	0	0	1	0	1	1	1	0	0	0	1	0	0	0	2	0	0
RC52_B28_1_bin.7	0	0	0	0	0	0	0	0	0	0	1	0	0	0	0	0	0	0	1	1	0	1	0	0	0	1	0	0	0	1	1	0	1	0	0	0	1	1	0	0	0	1	0	0	0	1	2	2	0
RC52_B28_1_bin.8	0	0	0	0	0	0	1	1	1	0	1	1	1	1	0	1	1	1	0	0	0	0	1	0	0	0	0	1	0	1	0	0	1	0	0	0	1	1	0	0	0	0	0	0	0	0	0	0	0
RC52_B44_1_bin.1	1	0	0	0	0	0	0	1	0	1	0	1	0	0	0	1	0	1	0	0	0	0	4	0	0	0	0	1	0	0	0	0	0	0	0	0	0	1	0	0	0	0	0	0	0	0	0	0	0
RC52_B44_1_bin.14	0	0	0	0	0	0	0	0	0	0	0	0	2	1	0	1	0	0	0	0	1	1	4	0	0	0	0	0	0	0	0	0	0	0	0	0	0	1	0	0	0	0	0	0	0	0	0	0	1
RC52_B44_1_bin.16	1	1	0	0	2	1	1	1	1	1	0	1	0	0	0	1	1	1	0	0	0	0	0	0	0	0	0	0	0	1	0	0	1	0	0	0	1	1	0	0	0	0	0	0	1	0	0	0	0
RC52_B44_1_bin.18	2	1	1	1	0	1	0	0	0	2	0	1	0	0	0	1	1	1	0	0	0	0	5	1	1	0	0	0	1	1	0	0	1	0	0	1	0	0	0	0	0	0	0	0	0	0	0	0	0
RC52_B44_1_bin.19	0	0	0	0	0	1	0	0	0	0	1	1	0	0	0	0	1	1	1	1	0	1	3	0	0	0	0	0	0	1	1	1	0	1	1	1	0	1	1	0	0	0	0	0	0	0	0	0	1
RC52_B44_1_bin.2	0	0	0	0	0	1	0	0	0	0	0	1	0	0	0	0	0	1	0	0	0	1	0	0	0	0	0	0	0	0	0	0	0	0	0	0	1	1	0	0	0	0	0	0	0	0	0	0	1
RC52_B44_1_bin.23	0	0	0	0	0	0	0	0	0	0	1	0	1	1	0	0	0	0	0	0	0	1	5	0	0	0	0	0	0	1	1	0	1	0	1	0	0	1	0	0	0	0	0	0	0	0	0	0	0
RC52_B44_1_bin.24	0	0	0	0	0	0	0	0	0	0	0	1	1	1	0	0	1	1	0	0	0	0	0	0	0	0	0	0	0	0	0	0	0	0	0	0	0	1	0	0	0	1	0	1	0	0	1	1	1
RC52_B44_1_bin.25	0	0	0	0	0	0	0	0	0	0	1	0	1	1	0	1	0	0	1	1	0	0	0	0	0	0	0	0	0	1	0	0	1	0	0	0	0	1	0	0	0	0	0	0	0	1	1	0	1
RC52_B44_1_bin.28	0	0	0	0	0	0	0	0	0	0	0	0	0	0	1	0	0	0	0	1	1	1	0	0	0	0	0	0	0	0	1	0	0	0	0	0	0	1	0	0	0	0	0	0	0	0	3	1	1
RC52_B44_1_bin.3	1	1	0	0	1	1	0	0	0	1	0	0	0	0	0	0	0	0	0	1	0	0	1	1	1	0	0	0	0	0	0	0	1	0	0	1	0	1	0	0	0	0	0	0	0	0	0	0	0
RC52_B44_1_bin.31	0	0	0	0	0	0	0	0	0	0	0	0	0	0	0	0	0	0	0	0	0	1	6	0	0	0	0	0	0	0	0	0	1	0	1	1	0	1	0	0	0	1	0	0	0	0	0	0	0
RC52_B44_1_bin.33	0	0	0	0	0	0	1	1	1	0	0	0	0	0	0	1	0	0	0	0	0	0	0	0	0	2	0	0	0	0	1	0	0	0	0	0	0	1	0	0	0	0	0	0	0	0	0	0	0
RC52_B44_1_bin.34	1	1	1	1	1	1	1	1	0	1	0	1	0	0	0	1	1	1	0	0	0	0	8	0	0	0	0	4	0	0	1	0	1	0	0	0	0	1	0	0	0	0	0	0	0	0	0	0	0
RC52_B44_1_bin.35	0	0	0	0	0	0	1	0	0	0	0	0	0	0	0	0	0	0	0	0	0	0	0	0	0	0	0	0	0	1	0	0	0	1	1	0	0	0	0	0	0	0	0	0	0	0	0	0	0
RC52_B44_1_bin.37	1	1	1	1	1	1	0	0	0	1	0	0	0	0	0	0	0	0	0	0	1	0	3	0	0	0	0	0	1	1	1	0	1	1	1	0	0	0	0	0	0	0	1	0	1	0	0	0	0
RC52_B44_1_bin.38	0	0	0	0	0	0	1	1	1	0	0	1	0	0	0	1	1	1	0	0	0	0	0	0	0	0	0	0	1	0	0	0	1	0	0	0	0	1	0	0	0	0	0	0	0	0	0	0	0
RC52_B44_1_bin.39	1	1	0	1	1	2	0	0	0	1	1	0	0	0	0	1	0	0	1	1	0	0	3	1	1	0	0	0	0	1	0	1	1	0	1	1	0	1	0	0	0	1	0	1	0	0	1	1	0
RC52_B44_1_bin.4	1	1	1	1	0	0	0	0	0	1	1	0	0	0	0	1	0	0	1	1	1	1	0	1	1	0	0	0	0	1	0	0	0	0	1	0	1	1	0	0	0	0	0	0	0	0	0	0	0
RC52_B44_1_bin.41	1	2	1	0	1	1	0	0	0	1	1	0	1	1	0	1	1	0	0	0	1	1	1	0	0	1	0	1	1	1	1	1	1	0	1	0	0	1	0	0	0	0	0	0	0	0	1	0	0
RC52_B44_1_bin.42	0	0	0	0	0	0	0	0	0	0	0	0	1	1	0	1	1	0	0	0	0	0	7	0	0	0	0	0	0	1	0	0	1	0	0	0	1	1	0	0	0	1	0	0	0	0	0	0	1
RC52_B44_1_bin.43	0	0	0	0	0	0	0	0	0	0	0	1	1	1	0	1	0	1	1	1	1	1	0	0	0	0	0	0	0	0	1	0	0	0	1	0	0	1	0	0	0	1	0	0	0	1	0	1	1
RC52_B44_1_bin.45	1	1	1	1	3	3	0	0	0	1	1	0	0	0	0	2	1	0	1	1	0	0	7	0	0	0	0	0	0	0	0	0	0	0	1	0	0	1	0	0	0	0	0	1	0	0	0	0	0
RC52_B44_1_bin.47	0	0	0	0	0	0	0	0	0	0	0	0	0	0	0	1	1	0	1	1	0	0	0	0	0	1	0	0	0	0	0	0	0	0	1	0	1	1	0	0	0	0	0	0	0	0	0	0	0
RC52_B44_1_bin.48	2	2	2	2	4	6	0	0	0	2	0	0	0	0	0	6	0	0	0	0	1	1	14	2	2	0	0	0	0	1	0	0	0	0	1	0	0	1	0	0	0	1	0	1	0	1	0	0	1
RC52_B44_1_bin.49	0	0	0	0	0	1	0	0	0	0	0	0	0	0	0	0	0	0	1	1	0	0	3	0	0	0	0	0	0	1	0	0	1	1	1	1	0	1	0	0	0	0	0	0	0	0	0	0	0
RC52_B44_1_bin.51	0	1	1	1	2	2	0	0	0	0	1	0	0	0	0	1	0	0	1	1	1	1	0	0	0	0	0	1	0	0	1	1	1	0	1	0	0	1	0	0	0	1	0	1	0	0	0	0	1
RC52_B44_1_bin.52	1	1	0	1	1	1	0	1	1	1	0	1	1	0	0	0	0	1	0	0	0	1	6	0	0	0	0	3	0	0	1	1	1	0	1	0	1	1	0	0	0	0	0	0	0	1	0	0	1
RC52_B44_1_bin.53	0	0	1	1	1	0	0	0	0	0	1	0	0	0	0	1	0	0	1	1	1	0	0	0	0	0	0	0	0	0	1	0	1	0	0	1	0	1	0	0	0	2	0	0	2	0	2	2	0
RC52_B44_1_bin.54	0	0	0	0	0	1	0	0	0	0	0	0	0	0	0	1	0	0	1	1	0	1	0	2	2	1	0	0	0	1	0	0	1	0	0	0	1	1	0	0	0	0	0	0	1	0	0	0	0
RC52_B44_1_bin.55	0	0	0	0	0	0	0	0	0	0	1	1	1	0	1	0	1	1	1	1	0	1	5	0	0	0	0	0	0	1	0	0	1	0	0	0	0	1	0	0	0	0	2	0	0	2	1	2	0
RC52_B44_1_bin.56	1	1	1	1	1	1	1	1	1	1	1	1	0	0	0	1	1	1	1	0	1	0	0	0	0	0	0	0	0	0	1	0	0	0	1	0	1	1	1	0	0	0	0	0	0	2	1	1	0
RC52_B44_1_bin.57	0	0	0	0	0	0	0	0	0	0	1	0	0	0	0	1	0	0	1	0	0	0	3	0	0	0	0	0	0	1	0	1	0	1	0	1	1	1	0	0	0	0	0	0	0	2	0	0	0
RC52_B44_1_bin.58	1	1	1	1	1	2	0	0	0	1	0	0	0	0	0	0	1	0	0	0	0	1	3	0	0	0	0	0	0	0	0	0	1	0	0	0	1	1	0	0	0	1	0	0	0	0	0	0	1
RC52_B44_1_bin.59	1	0	0	1	1	0	0	0	0	1	0	1	1	0	0	1	1	1	0	0	0	0	0	2	2	0	0	0	2	0	0	0	0	0	0	0	0	1	0	0	0	0	0	0	0	0	0	0	0
RC52_B44_1_bin.6	0	0	0	0	0	0	0	0	0	0	1	0	0	0	0	1	0	0	1	1	0	0	9	0	0	0	0	0	0	0	0	0	1	0	1	0	0	0	0	0	1	2	0	0	0	1	1	0	1
RC52_B44_1_bin.60	1	1	1	1	1	1	1	1	1	1	0	1	0	0	0	2	1	1	0	0	0	1	2	0	0	0	0	0	0	1	0	1	0	0	0	0	1	1	0	0	0	0	0	0	0	0	0	0	1
RC52_B44_1_bin.61	1	1	0	1	1	2	1	1	1	1	1	0	0	1	0	1	0	0	1	1	1	1	3	2	2	0	0	0	2	0	0	0	1	0	1	0	0	1	0	0	0	0	0	0	0	1	1	0	0
RC52_B44_1_bin.62	1	1	1	1	1	1	0	0	0	1	1	0	0	0	0	0	0	0	0	1	0	1	0	0	0	6	0	1	0	0	1	1	0	0	0	0	1	1	0	0	0	0	0	0	0	1	2	0	0
RC52_B44_1_bin.8	0	0	0	0	0	0	0	0	0	0	0	1	0	0	0	1	0	1	0	0	0	1	0	0	0	0	0	0	0	0	0	0	1	0	0	0	1	1	0	0	0	0	0	0	1	0	0	0	0
RC52_F14_3_bin.10	1	1	1	2	3	3	0	0	0	1	1	0	0	0	0	1	1	0	1	1	1	0	8	0	0	0	0	1	0	0	0	0	1	0	0	0	0	0	0	0	0	1	1	0	0	2	0	1	1
RC52_F14_3_bin.11	1	1	1	1	1	1	0	0	0	1	0	2	0	0	0	1	2	2	0	0	1	1	0	0	0	0	0	0	0	1	1	0	1	0	0	0	1	1	0	0	0	0	1	0	0	1	1	0	0
RC52_F14_3_bin.12	2	1	1	1	0	0	1	1	1	2	1	0	0	0	0	2	1	0	1	1	0	0	0	1	1	0	0	0	1	0	0	0	0	0	1	0	0	1	0	0	0	0	1	0	0	3	0	1	0
RC52_F14_3_bin.13	0	0	0	0	0	0	0	0	0	0	0	1	0	0	0	0	1	1	1	1	0	0	7	0	0	0	0	0	0	0	1	0	1	1	1	0	1	0	0	0	0	0	0	0	0	0	0	0	0
RC52_F14_3_bin.14	0	0	0	0	0	0	0	0	0	0	0	0	2	1	1	0	0	0	0	0	0	1	4	0	0	1	0	0	0	0	1	0	0	0	1	0	0	1	0	0	0	0	0	0	0	0	0	0	1
RC52_F14_3_bin.16	0	0	0	0	0	0	0	0	0	0	1	0	0	0	0	0	0	0	1	1	0	1	0	0	0	0	0	0	0	0	1	0	0	1	1	0	1	1	0	0	0	0	1	0	0	1	2	1	0
RC52_F14_3_bin.17	0	0	0	0	0	0	0	0	0	0	1	1	0	1	0	1	1	1	1	1	0	1	0	0	0	0	0	0	0	0	0	1	0	1	1	0	1	1	0	0	0	0	0	1	0	0	0	0	1
RC52_F14_3_bin.18	0	0	1	0	1	0	0	0	0	0	0	1	2	1	0	1	0	1	0	0	0	0	1	0	0	1	0	1	0	0	0	1	1	0	1	0	1	1	0	0	0	0	0	0	0	0	0	0	1
RC52_F14_3_bin.22	0	0	0	0	0	0	0	0	0	0	0	0	2	1	0	1	1	0	0	0	0	0	3	0	0	0	0	0	0	1	1	0	1	1	1	1	0	1	0	0	0	0	0	0	0	0	0	0	0
RC52_F14_3_bin.24	0	0	0	0	0	3	0	0	0	0	1	1	0	0	0	0	1	1	0	0	0	0	1	0	0	0	0	0	0	1	0	0	1	0	0	0	0	1	0	0	0	0	0	0	0	0	0	0	0
RC52_F14_3_bin.25	1	1	1	2	1	1	0	0	0	1	0	0	1	1	0	1	1	0	0	0	0	0	0	0	0	0	0	2	0	1	1	1	1	0	1	1	0	0	0	0	0	0	0	0	0	0	0	0	0
RC52_F14_3_bin.30	0	0	1	1	2	2	1	1	1	0	1	1	0	0	0	1	1	1	0	0	0	1	0	0	0	0	0	0	0	1	0	1	0	1	1	0	0	1	0	0	0	0	0	0	0	0	0	0	0
RC52_F14_3_bin.32	1	1	1	1	2	2	1	1	1	1	0	1	0	0	0	0	1	1	0	0	1	1	0	0	0	0	0	0	0	1	0	1	0	0	1	1	0	1	0	0	0	0	0	0	0	0	0	0	0
RC52_F14_3_bin.33	0	0	0	0	0	0	0	0	0	0	0	1	0	0	0	0	1	1	0	0	1	0	0	0	0	0	0	0	0	1	0	0	1	1	0	0	0	1	0	0	0	1	0	0	0	0	0	0	0
RC52_F14_3_bin.35	0	0	0	0	0	0	0	0	0	0	1	0	0	1	0	1	0	0	1	1	0	0	7	3	3	0	0	0	0	1	1	0	0	0	1	0	0	1	0	0	0	0	0	0	0	0	1	0	1
RC52_F14_3_bin.38	0	1	0	0	1	1	0	0	0	0	1	1	0	0	0	0	1	1	0	0	0	0	1	2	2	0	0	0	0	0	0	0	0	0	0	0	0	1	0	0	0	1	1	0	0	1	1	0	0
RC52_F14_3_bin.41	0	0	0	0	0	0	0	0	0	0	1	0	0	0	0	1	1	0	1	1	0	0	7	0	0	0	0	0	0	0	0	0	0	0	1	0	1	1	0	0	0	1	0	1	0	0	1	0	1
RC52_F14_3_bin.44	1	1	1	1	0	1	1	0	1	1	0	1	1	0	0	1	1	1	0	0	0	0	8	0	0	0	0	0	1	1	0	0	1	0	1	1	1	1	0	0	0	1	0	0	0	1	0	1	0
RC52_F14_3_bin.45	1	1	1	2	1	0	0	0	0	1	0	0	0	0	0	0	0	0	0	0	1	1	0	0	0	0	0	0	0	0	0	0	0	0	0	0	0	1	0	0	0	1	0	0	0	1	1	0	0
RC52_F14_3_bin.47	2	1	1	1	1	2	1	0	2	2	0	0	0	0	0	1	0	0	1	1	0	1	0	0	0	0	0	0	0	1	0	0	0	0	1	1	0	1	0	0	0	1	0	0	1	0	0	1	0
RC52_F14_3_bin.49	1	1	1	1	2	2	1	1	0	1	0	1	0	0	0	1	1	1	0	0	1	1	4	0	0	0	0	1	0	0	1	0	1	1	1	0	0	1	0	0	0	0	0	0	0	0	0	0	1
RC52_F14_3_bin.5	1	1	1	1	2	1	1	1	1	1	1	1	0	0	0	3	0	1	1	1	1	1	1	0	0	0	0	0	0	1	0	0	0	0	0	0	0	1	0	0	0	0	1	0	0	1	3	1	0
RC52_F14_3_bin.50	0	0	0	0	0	0	0	0	0	0	1	0	0	0	0	0	1	0	0	0	0	0	0	0	0	0	0	0	0	0	1	0	0	0	1	0	1	1	0	0	0	1	0	0	1	0	1	0	0
RC52_F14_3_bin.51	1	1	1	1	2	2	2	2	2	1	1	1	0	0	0	3	1	1	1	0	0	0	0	1	1	0	0	0	0	0	0	0	0	1	1	0	0	1	0	0	0	0	1	0	0	0	0	0	0
[truncated: 41 more rows]
[truncated: 19 more columns]

## Sheet: Table S5
Table S5: KEGG genes and pathways related to the biofilm cycle, biogeochemical cycling (carbon, nitrogen, sulfur, iron), and ATPases observed for both actively and non-actively replicating MAGs (based on iREP) of planktonic communities, generated by DRAM and METABOLIC-G, and compared in Figures 2, 3B, 3C, 4, and 5.
[truncated: 899 more rows]
[truncated: 19 more columns]

[truncated: 2 more sheets: Table S6, Table S7]
