# Supplementary material for: Two worlds beneath: Distinct microbial strategies of the rock-attached and planktonic subsurface biosphere
Source: Research Square preprint supplement (doi:10.21203/rs.3.rs-7131340/v1), 2025-07-16
Supplement: Supplementary file 2 [file ffa276eaa3823bf4fd223754.docx]

## Two worlds beneath: Distinct microbial strategies of the rock-attached and planktonic subsurface biosphere

Alisha Sharma1, Kirsten Küsel1,2,3, Carl-Eric Wegner1, Olga Maria Pérez-Carrascal1,2, Martin Taubert1,2

*1Aquatic Geomicrobiology, Institute of Biodiversity Ecology and Evolution, Friedrich Schiller University Jena, Dornburger Strasse 159, 07743, Jena, Germany*

*2Cluster of Excellence Balance of the Microverse, Friedrich Schiller University Jena, Grüne Aue, 07745, Jena, Germany*

*3German Center for Integrative Biodiversity Research (iDiv) Halle-Jena-Leipzig, Puschstrasse 4, 04103, Leipzig, Germany*

*4BIOMICS-Group, Heinrich Heine University, Düsseldorf, Universitätsstraße 1, 40225 Düsseldorf, Germany*

Keywords: Biofilms; Chemolithoautotrophy; Carbonate rock; Groundwater; Metagenomics

***Corresponding author**: Martin Taubert (martin.taubert@uni-jena.de)

**
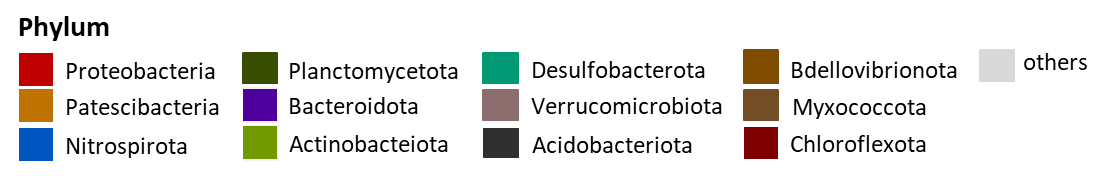

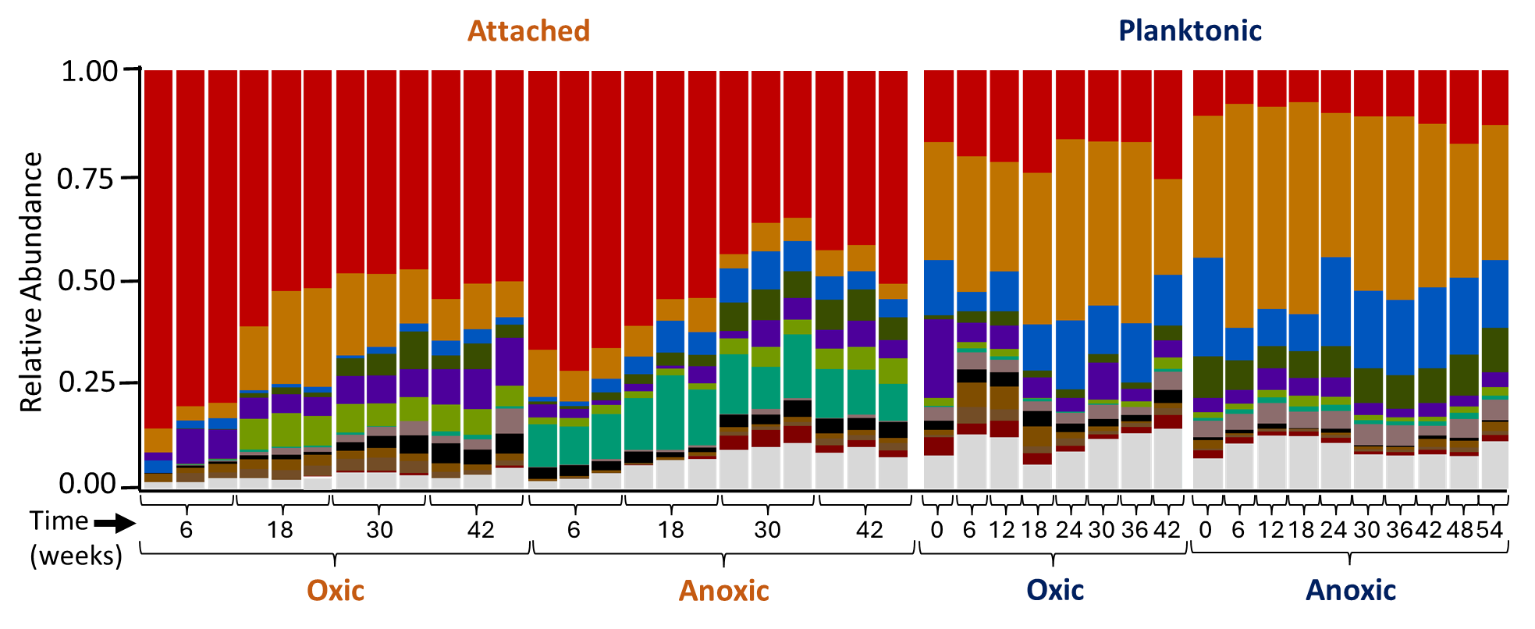
**

**Figure S1:** Taxonomic composition of bacterial community. Taxonomic profiles were derived from read abundance obtained through Illumina MiSeq sequencing of bacterial 16S rRNA genes from DNA extracted from passive samplers and in situ groundwater under (a) oxic and (b) anoxic conditions. Passive sampler material were collected at four time points with three replicates per condition (n = 24). In situ groundwater samples were collected at eight time points under oxic conditions and ten time points under anoxic conditions. The figure displays the 12 most abundant bacterial phyla; less abundant phyla are grouped under the category “others.”


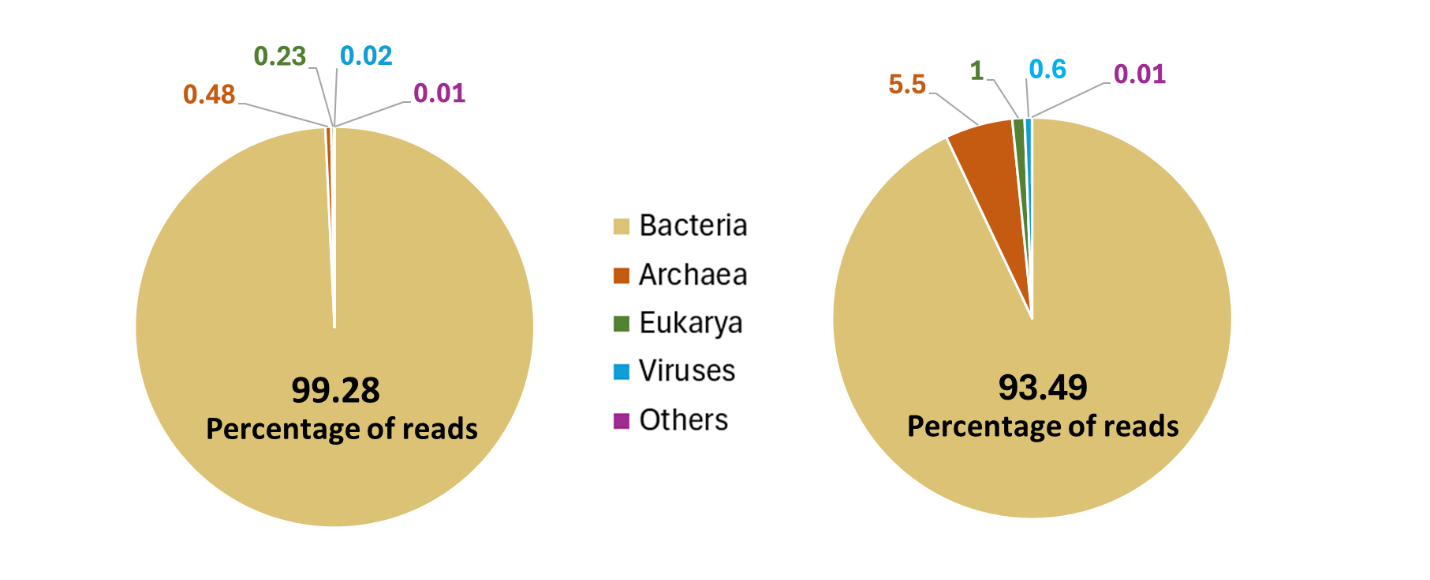


A

B


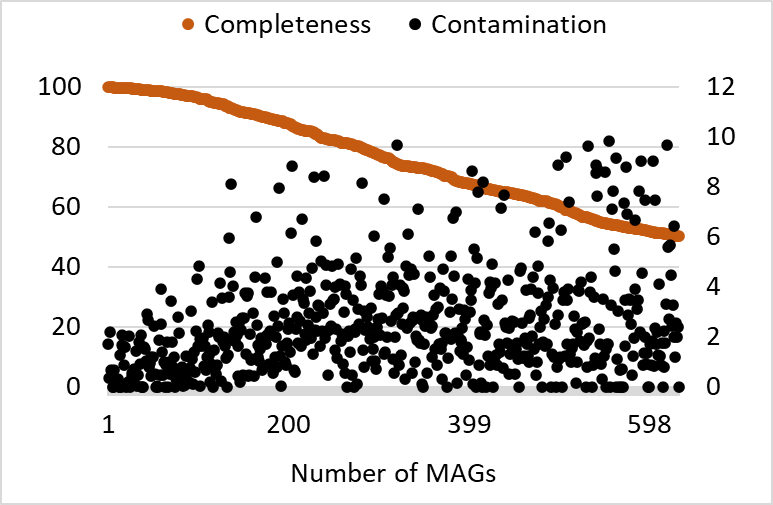

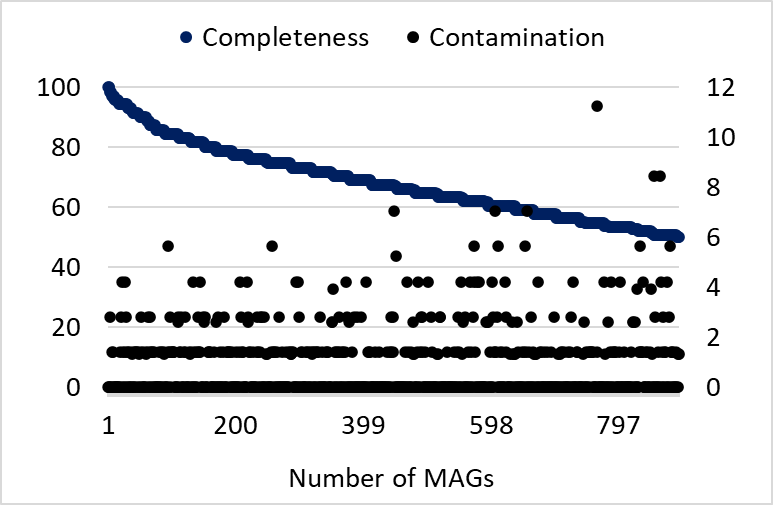


**Figure S2:** (A) Community composition of the rock-attached and groundwater microbes based on metagenomic reads obtained from 10 samples each of bioreactor experiment and passive samplers exposed to oxic (well H41) and anoxic (well H52) groundwater of Hainich CZE. (B) quality of dereplicated MAGs obtained. Only medium- and high-quality MAGs from rock-attached (orange) and planktonic (blue) microbial communities were included in the analysis, with each black dot in the figure representing the contamination level of the corresponding MAG.


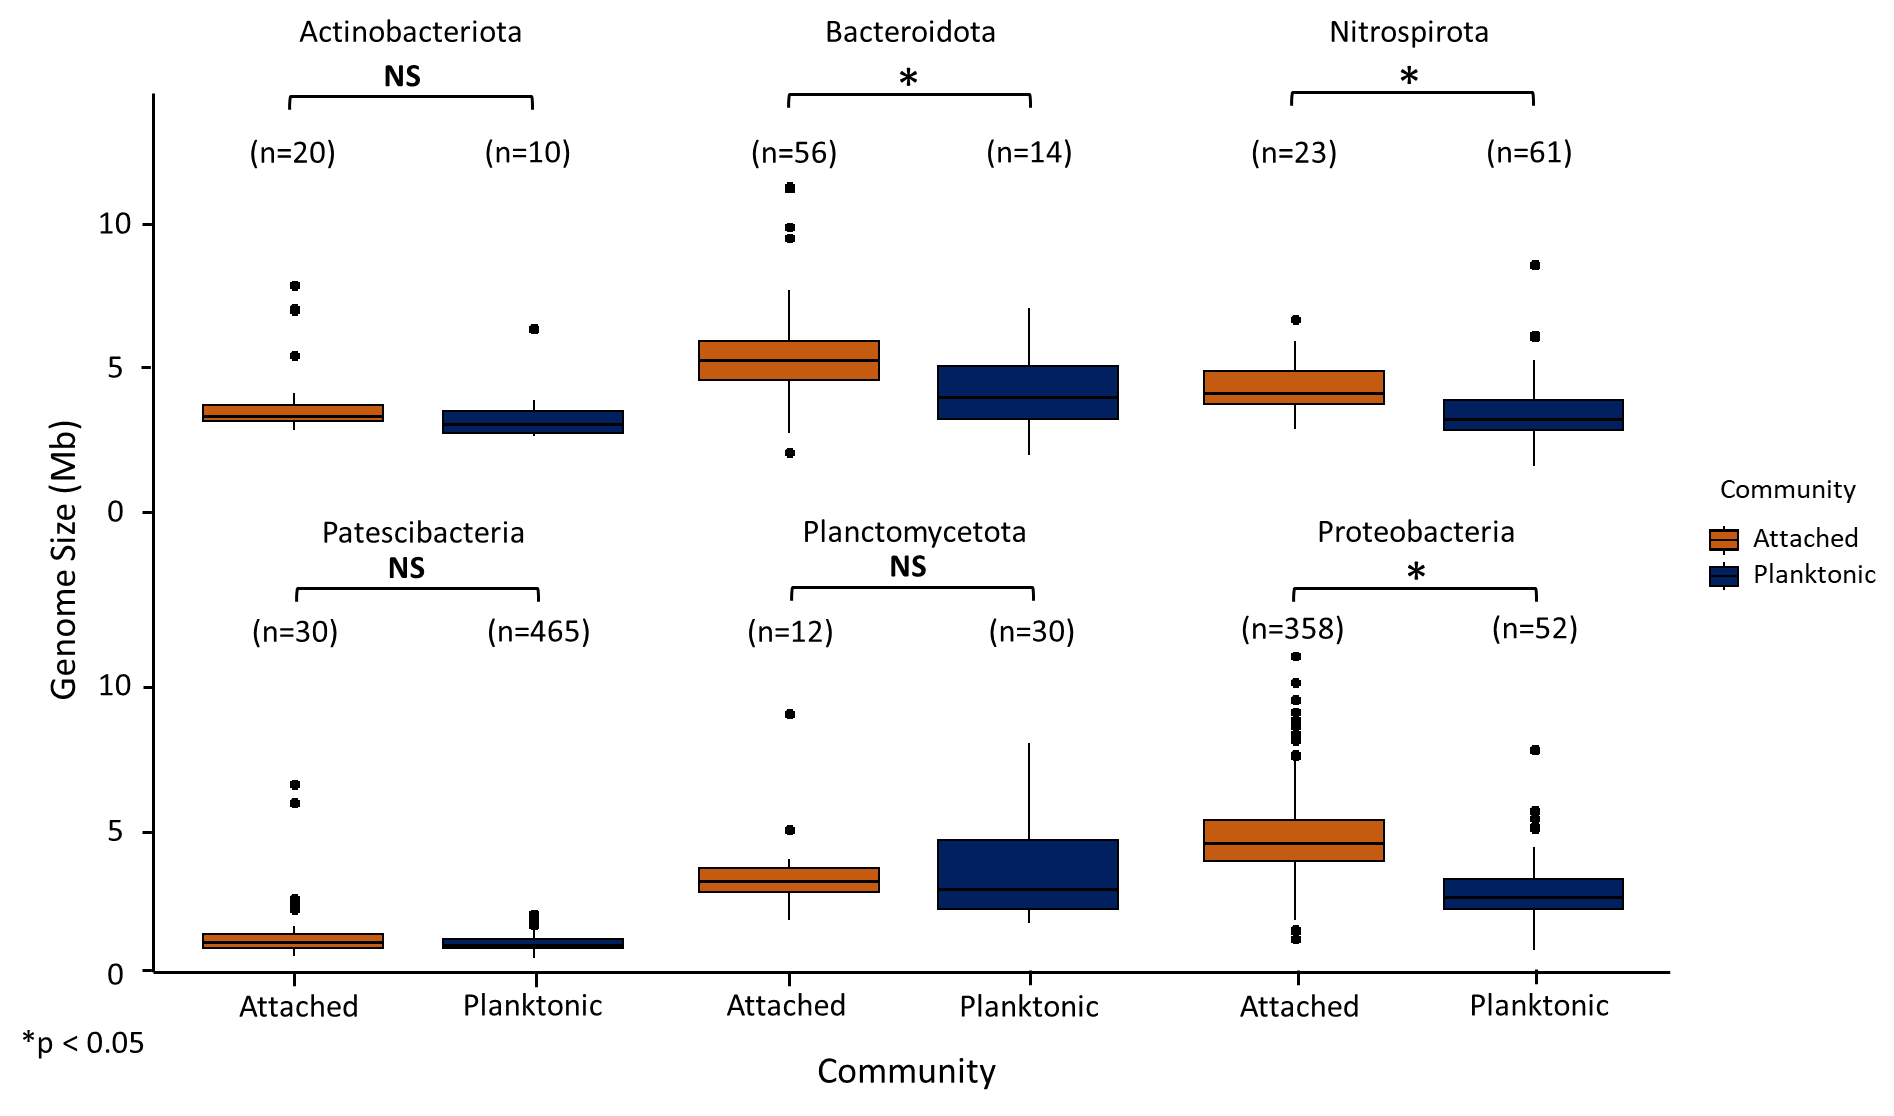


**Figure S3:** Genome size differences between attached and planktonic phyla with more than 10 MAGs. The data was derived from checkM analysis and genome size of each MAG was corrected for completeness and contamination. Statistical significance is denoted as not significant (NS) for *p* > 0.05, * for *p* ≤ 0.05, and *** for *p* ≤ 0.001
